# Supplementary material for: Exploring the Mechanism of Flavonoids Through Systematic Bioinformatics Analysis
Source: Front Pharmacol. 2018 Aug 15;9:918. doi: 10.3389/fphar.2018.00918 (PMC6104453; doi:10.3389/fphar.2018.00918)
Supplement: Supplementary file 1 [file Table_1.xlsx]

## Sheet: 679 flavonoids
Supplementary Table 1. Information of 679 flavonoids and 481 corresponding targets.
common_name	subclass	IUPAC_name	Formula	InCHIKey	InCHI	SMILES	Target	number of target
2-(4-Hydroxyphenyl)-7-Methoxychromen-4-One	Flavones	2-(4-hydroxyphenyl)-7-methoxychromen-4-one	C16H12O4	DZUKXCCSULKRJA-UHFFFAOYSA-N	InChI=1S/C16H12O4/c1-19-12-6-7-13-14(18)9-15(20-16(13)8-12)10-2-4-11(17)5-3-10/h2-9,17H,1H3	COc1ccc2c(c1)oc(cc2=O)c1ccc(cc1)O	P00352,P11712,Q03164,P15428,P10636,P08684,Q99714,P10635,P33261	9
Licoflavanone A	Flavones	7-hydroxy-2-(4-hydroxyphenyl)-6-(3-methylbut-2-enyl)chromen-4-one	C20H18O4	HJGURBGBPIKRER-UHFFFAOYSA-N	InChI=1S/C20H18O4/c1-12(2)3-4-14-9-16-18(23)11-19(24-20(16)10-17(14)22)13-5-7-15(21)8-6-13/h3,5-11,21-22H,4H2,1-2H3	CC(=CCc1cc2c(=O)cc(oc2cc1O)c1ccc(cc1)O)C	P18031	1
Phaseol	Others	3,9-dihydroxy-4-(3-methylbut-2-enyl)-[1]benzofuro[3,2-c]chromen-6-one	C20H16O5	FRXPSBUCIWPZMH-UHFFFAOYSA-N	InChI=1S/C20H16O5/c1-10(2)3-5-12-15(22)8-7-14-18(12)25-20(23)17-13-6-4-11(21)9-16(13)24-19(14)17/h3-4,6-9,21-22H,5H2,1-2H3	CC(=CCc1c(O)ccc2c1oc(=O)c1c2oc2c1ccc(c2)O)C	P18031	1
Kuwanon E	Flavanones	2-[5-[(2E)-3,7-dimethylocta-2,6-dienyl]-2,4-dihydroxyphenyl]-5,7-dihydroxy-2,3-dihydrochromen-4-one	C25H28O6	GJFHZVPRFLHEBR-VIZOYTHASA-N	InChI=1S/C25H28O6/c1-14(2)5-4-6-15(3)7-8-16-9-18(20(28)12-19(16)27)23-13-22(30)25-21(29)10-17(26)11-24(25)31-23/h5,7,9-12,23,26-29H,4,6,8,13H2,1-3H3/b15-7+	C/C(=CCc1cc(c(cc1O)O)C1CC(=O)c2c(O1)cc(cc2O)O)/CCC=C(C)C	P06276,P22303	2
Glycyrol	Others	3,9-dihydroxy-1-methoxy-2-(3-methylbut-2-enyl)-[1]benzofuro[3,2-c]chromen-6-one	C21H18O6	LWESBHWAOZORCQ-UHFFFAOYSA-N	InChI=1S/C21H18O6/c1-10(2)4-6-12-14(23)9-16-18(19(12)25-3)20-17(21(24)27-16)13-7-5-11(22)8-15(13)26-20/h4-5,7-9,22-23H,6H2,1-3H3	COc1c(CC=C(C)C)c(O)cc2c1c1oc3c(c1c(=O)o2)ccc(c3)O	O75496,Q16236,P84022,O75874	4
Ermanin	Flavonols	5,7-dihydroxy-3-methoxy-2-(4-methoxyphenyl)chromen-4-one	C17H14O6	RJCJVIFSIXKSAH-UHFFFAOYSA-N	InChI=1S/C17H14O6/c1-21-11-5-3-9(4-6-11)16-17(22-2)15(20)14-12(19)7-10(18)8-13(14)23-16/h3-8,18-19H,1-2H3	COc1ccc(cc1)c1oc2cc(O)cc(c2c(=O)c1OC)O	P10635,P08684	2
(R)-Pinocembrin	Flavanones	(2R)-5,7-dihydroxy-2-phenyl-2,3-dihydrochromen-4-one	C15H12O4	URFCJEUYXNAHFI-CYBMUJFWSA-N	InChI=1S/C15H12O4/c16-10-6-11(17)15-12(18)8-13(19-14(15)7-10)9-4-2-1-3-5-9/h1-7,13,16-17H,8H2/t13-/m1/s1	Oc1cc2O[C@H](CC(=O)c2c(c1)O)c1ccccc1	Q03164,P10636,Q99714,P33261	4
5,7-Dihydroxy-2-(4-Hydroxyphenyl)-6-[3,4,5-Trihydroxy-6-(Hydroxymethyl)Oxan-2-Yl]-8-(3,4,5-Trihydroxyoxan-2-Yl)Chromen-4-One	Flavones	5,7-dihydroxy-2-(4-hydroxyphenyl)-6-[3,4,5-trihydroxy-6-(hydroxymethyl)oxan-2-yl]-8-(3,4,5-trihydroxyoxan-2-yl)chromen-4-one	C26H28O14	MMDUKUSNQNWVET-UHFFFAOYSA-N	InChI=1S/C26H28O14/c27-6-13-18(32)21(35)23(37)26(40-13)15-19(33)14-10(29)5-12(8-1-3-9(28)4-2-8)39-24(14)16(20(15)34)25-22(36)17(31)11(30)7-38-25/h1-5,11,13,17-18,21-23,25-28,30-37H,6-7H2	OCC1OC(C(C(C1O)O)O)c1c(O)c(C2OCC(C(C2O)O)O)c2c(c1O)c(=O)cc(o2)c1ccc(cc1)O	P27695,P39748,Q9UBT6,P06746,Q9UNA4,P10253,Q9Y253	7
(-)-Catechingallate	Flavan-3-ols	[(2S,3R)-2-(3,4-dihydroxyphenyl)-5,7-dihydroxy-3,4-dihydro-2H-chromen-3-yl] 3,4,5-trihydroxybenzoate	C22H18O10	LSHVYAFMTMFKBA-CTNGQTDRSA-N	InChI=1S/C22H18O10/c23-11-6-14(25)12-8-19(32-22(30)10-4-16(27)20(29)17(28)5-10)21(31-18(12)7-11)9-1-2-13(24)15(26)3-9/h1-7,19,21,23-29H,8H2/t19-,21+/m1/s1	Oc1cc(O)c2c(c1)O[C@H]([C@@H](C2)OC(=O)c1cc(O)c(c(c1)O)O)c1ccc(c(c1)O)O	P52209,P56817	2
Formononetin	Isoflavones	7-hydroxy-3-(4-methoxyphenyl)chromen-4-one	C16H12O4	HKQYGTCOTHHOMP-UHFFFAOYSA-N	InChI=1S/C16H12O4/c1-19-12-5-2-10(3-6-12)14-9-20-15-8-11(17)4-7-13(15)16(14)18/h2-9,17H,1H3	COc1ccc(cc1)c1coc2c(c1=O)ccc(c2)O	P19838,Q03181,Q9NPD5,Q9Y6L6,P13866,Q16637,P33261,P38398,P04637,P10275,P31639,Q03431,P04798,Q07869,B2RXH2,P10635,P37231,P11712,Q03164,P15428,P10636,Q16236,P60568	23
(+)-Conocarpan	Others	4-[(2R,3R)-3-methyl-5-[(E)-prop-1-enyl]-2,3-dihydro-1-benzofuran-2-yl]phenol	C18H18O2	GXJSAHXNLJFDPO-CGBXWHSCSA-N	InChI=1S/C18H18O2/c1-3-4-13-5-10-17-16(11-13)12(2)18(20-17)14-6-8-15(19)9-7-14/h3-12,18-19H,1-2H3/b4-3+/t12-,18-/m1/s1	C/C=C/c1ccc2c(c1)[C@@H](C)[C@@H](O2)c1ccc(cc1)O	O14684,P09917	2
5,7-Dihydroxy-2-(4-Hydroxyphenyl)-8-(3-Methylbut-2-Enyl)-3-[(2S,3R,4R,5R,6S)-3,4,5-Trihydroxy-6-Methyloxan-2-Yl]Oxychromen-4-One	Flavonols	5,7-dihydroxy-2-(4-hydroxyphenyl)-8-(3-methylbut-2-enyl)-3-[(2S,3R,4R,5R,6S)-3,4,5-trihydroxy-6-methyloxan-2-yl]oxychromen-4-one	C26H28O10	RPLMLWBOUPDPQF-GULSFEPBSA-N	InChI=1S/C26H28O10/c1-11(2)4-9-15-16(28)10-17(29)18-20(31)25(36-26-22(33)21(32)19(30)12(3)34-26)23(35-24(15)18)13-5-7-14(27)8-6-13/h4-8,10,12,19,21-22,26-30,32-33H,9H2,1-3H3/t12-,19-,21+,22+,26-/m0/s1	CC(=CCc1c(O)cc(c2c1oc(c1ccc(cc1)O)c(c2=O)O[C@@H]1O[C@@H](C)[C@@H]([C@H]([C@H]1O)O)O)O)C	P43220,P61088,O75164,P17405	4
3-(2,4-Dihydroxyphenyl)-5,7-Dihydroxychromen-4-One	Isoflavones	3-(2,4-dihydroxyphenyl)-5,7-dihydroxychromen-4-one	C15H10O6	GSSOWCUOWLMMRJ-UHFFFAOYSA-N	InChI=1S/C15H10O6/c16-7-1-2-9(11(18)3-7)10-6-21-13-5-8(17)4-12(19)14(13)15(10)20/h1-6,16-19H	Oc1ccc(c(c1)O)c1coc2c(c1=O)c(O)cc(c2)O	P27695,P10636,Q9UBT6,Q03431,Q9UNA4,P10253,Q9Y253,Q96QE3	8
Sideroxylonal	Others	(2R,3S,4S)-2-(3,5-diformyl-2,4,6-trihydroxyphenyl)-5,7-dihydroxy-4-(2-methylpropyl)-3-propan-2-yl-3,4-dihydro-2H-chromene-6,8-dicarbaldehyde	C26H28O10	PHQDMQGEKNBIPF-GKZOTJLQSA-N	InChI=1S/C26H28O10/c1-10(2)5-12-17(11(3)4)26(19-23(34)13(6-27)20(31)14(7-28)24(19)35)36-25-16(9-30)21(32)15(8-29)22(33)18(12)25/h6-12,17,26,31-35H,5H2,1-4H3/t12-,17-,26+/m0/s1	O=Cc1c2O[C@H]([C@H]([C@@H](c2c(c(c1O)C=O)O)CC(C)C)C(C)C)c1c(O)c(C=O)c(c(c1O)C=O)O	P05121	1
Cyanin	Others	(2S,3R,4S,5S,6R)-2-[2-(3,4-dihydroxyphenyl)-7-hydroxy-3-[(2S,3R,4S,5S,6R)-3,4,5-trihydroxy-6-(hydroxymethyl)oxan-2-yl]oxychromenylium-5-yl]oxy-6-(hydroxymethyl)oxane-3,4,5-triol	C27H30O16	RDFLLVCQYHQOBU-ZOTFFYTFSA-O	InChI=1S/C27H30O16/c28-7-17-19(33)21(35)23(37)26(42-17)40-15-5-10(30)4-14-11(15)6-16(25(39-14)9-1-2-12(31)13(32)3-9)41-27-24(38)22(36)20(34)18(8-29)43-27/h1-6,17-24,26-29,33-38H,7-8H2,(H2-,30,31,32)/p+1/t17-,18-,19-,20-,21+,22+,23-,24-,26-,27-/m1/s1	OC[C@H]1O[C@@H](Oc2cc(O)cc3c2cc(O[C@@H]2O[C@H](CO)[C@H]([C@@H]([C@H]2O)O)O)c([o+]3)c2ccc(c(c2)O)O)[C@@H]([C@H]([C@@H]1O)O)O	P00734	1
Cirsilineol	Flavones	2-(4-hydroxy-3-methoxyphenyl)-6,7-dimethoxychromen-4-one	C18H16O6	YPSSIDWEZCIQGA-UHFFFAOYSA-N	InChI=1S/C18H16O6/c1-21-16-6-10(4-5-12(16)19)14-8-13(20)11-7-17(22-2)18(23-3)9-15(11)24-14/h4-9,19H,1-3H3	COc1cc2oc(cc(=O)c2cc1OC)c1ccc(c(c1)OC)O	P35354,P23219	2
3-(3,4-Dimethoxyphenyl)-7-Methoxychromen-4-One	Isoflavones	3-(3,4-dimethoxyphenyl)-7-methoxychromen-4-one	C18H16O5	UKWLNMIPRJLYGH-UHFFFAOYSA-N	InChI=1S/C18H16O5/c1-20-12-5-6-13-16(9-12)23-10-14(18(13)19)11-4-7-15(21-2)17(8-11)22-3/h4-10H,1-3H3	COc1ccc2c(c1)occ(c2=O)c1ccc(c(c1)OC)OC	P27695,P43220,P10636,O15118,Q03431,P51151,Q96QE3,P38398	8
Moracin M	Others	5-(6-hydroxy-1-benzofuran-2-yl)benzene-1,3-diol	C14H10O4	LHPRYOJTASOZGJ-UHFFFAOYSA-N	InChI=1S/C14H10O4/c15-10-2-1-8-5-13(18-14(8)7-10)9-3-11(16)6-12(17)4-9/h1-7,15-17H	Oc1cc(O)cc(c1)c1oc2c(c1)ccc(c2)O	Q08499,P35354,Q8WZA2,O76083,P23219,Q03431,P17405,P11511,P05067,Q9H0H5,Q07343,O76074	12
2-(3,4-Dihydroxyphenyl)-5,7-Dihydroxychroman-3-Yl 3,4,5-Trihydroxybenzoate	Flavan-3-ols	[2-(3,4-dihydroxyphenyl)-5,7-dihydroxy-3,4-dihydro-2H-chromen-3-yl] 3,4,5-trihydroxybenzoate	C22H18O10	LSHVYAFMTMFKBA-UHFFFAOYSA-N	InChI=1S/C22H18O10/c23-11-6-14(25)12-8-19(32-22(30)10-4-16(27)20(29)17(28)5-10)21(31-18(12)7-11)9-1-2-13(24)15(26)3-9/h1-7,19,21,23-29H,8H2	Oc1cc(O)c2c(c1)OC(C(C2)OC(=O)c1cc(O)c(c(c1)O)O)c1ccc(c(c1)O)O	P22303	1
Cyclorigidol	Flavones	2,3,8,10-tetrahydroxy-9,11-bis(3-methylbut-2-enyl)-6-(2-methylprop-1-enyl)-6H-chromeno[4,3-b]chromen-7-one	C30H32O7	MOPJKKUUKHCZPG-UHFFFAOYSA-N	InChI=1S/C30H32O7/c1-14(2)7-9-17-26(33)18(10-8-15(3)4)29-25(27(17)34)28(35)24-23(11-16(5)6)36-22-13-21(32)20(31)12-19(22)30(24)37-29/h7-8,11-13,23,31-34H,9-10H2,1-6H3	CC(=CCc1c(O)c(CC=C(C)C)c(c2c1oc1c3cc(O)c(cc3OC(c1c2=O)C=C(C)C)O)O)C	P19838	1
Isorhamnetin-3-O-Nehesperridin	Flavonols	3-[(2S,3R,4S,5S,6R)-4,5-dihydroxy-6-(hydroxymethyl)-3-[(2S,3R,4R,5R,6S)-3,4,5-trihydroxy-6-methyloxan-2-yl]oxyoxan-2-yl]oxy-5,7-dihydroxy-2-(4-hydroxy-3-methoxyphenyl)chromen-4-one	C28H32O16	QHLKSZBFIJJREC-SPSUIZEHSA-N	InChI=1S/C28H32O16/c1-9-18(33)21(36)23(38)27(40-9)44-26-22(37)19(34)16(8-29)42-28(26)43-25-20(35)17-13(32)6-11(30)7-15(17)41-24(25)10-3-4-12(31)14(5-10)39-2/h3-7,9,16,18-19,21-23,26-34,36-38H,8H2,1-2H3/t9-,16+,18-,19+,21+,22-,23+,26+,27-,28-/m0/s1	OC[C@H]1O[C@@H](Oc2c(oc3c(c2=O)c(O)cc(c3)O)c2ccc(c(c2)OC)O)[C@@H]([C@H]([C@@H]1O)O)O[C@@H]1O[C@@H](C)[C@@H]([C@H]([C@H]1O)O)O	P03372	1
Isomyricitrin	Flavonols	5,7-dihydroxy-3-[(2S,3R,4S,5S,6R)-3,4,5-trihydroxy-6-(hydroxymethyl)oxan-2-yl]oxy-2-(3,4,5-trihydroxyphenyl)chromen-4-one	C21H20O13	FOHXFLPXBUAOJM-LIBJPBHASA-N	InChI=1S/C21H20O13/c22-5-12-15(28)17(30)18(31)21(33-12)34-20-16(29)13-8(24)3-7(23)4-11(13)32-19(20)6-1-9(25)14(27)10(26)2-6/h1-4,12,15,17-18,21-28,30-31H,5H2/t12-,15-,17+,18-,21+/m1/s1	OC[C@H]1O[C@@H](Oc2c(oc3c(c2=O)c(O)cc(c3)O)c2cc(O)c(c(c2)O)O)[C@@H]([C@H]([C@@H]1O)O)O	P34913	1
2-(3,4-Dihydroxyphenyl)-5-Hydroxy-7-[(2R,3R,4S,5S,6R)-3,4,5-Trihydroxy-6-(Hydroxymethyl)Oxan-2-Yl]Oxychromen-4-One	Flavones	2-(3,4-dihydroxyphenyl)-5-hydroxy-7-[(2R,3R,4S,5S,6R)-3,4,5-trihydroxy-6-(hydroxymethyl)oxan-2-yl]oxychromen-4-one	C21H20O11	PEFNSGRTCBGNAN-RQXATKFSSA-N	InChI=1S/C21H20O11/c22-7-16-18(27)19(28)20(29)21(32-16)30-9-4-12(25)17-13(26)6-14(31-15(17)5-9)8-1-2-10(23)11(24)3-8/h1-6,16,18-25,27-29H,7H2/t16-,18-,19+,20-,21+/m1/s1	OC[C@H]1O[C@H](Oc2cc(O)c3c(c2)oc(cc3=O)c2ccc(c(c2)O)O)[C@@H]([C@H]([C@@H]1O)O)O	P27695,B2RXH2,P46063,Q03164,Q9UBT6,P10636,P11021	7
7,8-Dihydroxyflavone	Flavones	7,8-dihydroxy-2-phenylchromen-4-one	C15H10O4	COCYGNDCWFKTMF-UHFFFAOYSA-N	InChI=1S/C15H10O4/c16-11-7-6-10-12(17)8-13(19-15(10)14(11)18)9-4-2-1-3-5-9/h1-8,16,18H	Oc1ccc2c(c1O)oc(cc2=O)c1ccccc1	P27695,O94782,Q9NPD5,Q9Y6L6,Q16637,Q16620,P04637,P16050,P11473,P00352,O14746,O14920,O15296,Q02880,P28482,P27338,Q03164,P15428,P08684,Q9UBT6,P06239,B2RXH2	22
Santin	Flavonols	5,7-dihydroxy-3,6-dimethoxy-2-(4-methoxyphenyl)chromen-4-one	C18H16O7	DWZAJFZEYZIHPO-UHFFFAOYSA-N	InChI=1S/C18H16O7/c1-22-10-6-4-9(5-7-10)16-18(24-3)15(21)13-12(25-16)8-11(19)17(23-2)14(13)20/h4-8,19-20H,1-3H3	COc1ccc(cc1)c1oc2cc(O)c(c(c2c(=O)c1OC)O)OC	P27695,Q9BUF5,P47989,P43220,Q9HC16,P14618,O75496,Q9UIF8,Q99700,P10636	10
Sappanol	Others	(3R,4S)-3-[(3,4-dihydroxyphenyl)methyl]-2,4-dihydrochromene-3,4,7-triol	C16H16O6	MPGFEHZDABUJFR-JKSUJKDBSA-N	InChI=1S/C16H16O6/c17-10-2-3-11-14(6-10)22-8-16(21,15(11)20)7-9-1-4-12(18)13(19)5-9/h1-6,15,17-21H,7-8H2/t15-,16+/m0/s1	Oc1ccc2c(c1)OC[C@]([C@H]2O)(O)Cc1ccc(c(c1)O)O	P12931,P35968	2
Erybraedin C	Others	(6aR,11aR)-2,10-bis(3-methylbut-2-enyl)-6a,11a-dihydro-6H-[1]benzofuro[3,2-c]chromene-3,9-diol	C25H28O4	LDKAMVCGTURXMH-CPJSRVTESA-N	InChI=1S/C25H28O4/c1-14(2)5-7-16-11-19-23(12-22(16)27)28-13-20-17-9-10-21(26)18(8-6-15(3)4)24(17)29-25(19)20/h5-6,9-12,20,25-27H,7-8,13H2,1-4H3/t20-,25-/m0/s1	CC(=CCc1cc2c(cc1O)OC[C@@H]1[C@H]2Oc2c1ccc(c2CC=C(C)C)O)C	P18031	1
5-Demethylnobiletin	Flavones	2-(3,4-dimethoxyphenyl)-5-hydroxy-6,7,8-trimethoxychromen-4-one	C20H20O8	DOFJNFPSMUCECH-UHFFFAOYSA-N	InChI=1S/C20H20O8/c1-23-12-7-6-10(8-14(12)24-2)13-9-11(21)15-16(22)18(25-3)20(27-5)19(26-4)17(15)28-13/h6-9,22H,1-5H3	COc1cc(ccc1OC)c1cc(=O)c2c(o1)c(OC)c(c(c2O)OC)OC	Q9BUF5,P00352,P02545,P28482,O75604,P10636	6
Afzelin	Flavonols	5,7-dihydroxy-2-(4-hydroxyphenyl)-3-[(2S,3R,4R,5R,6S)-3,4,5-trihydroxy-6-methyloxan-2-yl]oxychromen-4-one	C21H20O10	SOSLMHZOJATCCP-AEIZVZFYSA-N	InChI=1S/C21H20O10/c1-8-15(25)17(27)18(28)21(29-8)31-20-16(26)14-12(24)6-11(23)7-13(14)30-19(20)9-2-4-10(22)5-3-9/h2-8,15,17-18,21-25,27-28H,1H3/t8-,15-,17+,18+,21-/m0/s1	Oc1ccc(cc1)c1oc2cc(O)cc(c2c(=O)c1O[C@@H]1O[C@@H](C)[C@@H]([C@H]([C@H]1O)O)O)O	P08684	1
Tephrocandidin	Flavanones	7-hydroxy-8-[(Z)-3-hydroxy-3-methylbut-1-enyl]-2-(4-hydroxyphenyl)-5-methoxy-2,3-dihydrochromen-4-one	C21H22O6	UQJDHMKAJSKDGS-HJWRWDBZSA-N	InChI=1S/C21H22O6/c1-21(2,25)9-8-14-15(23)10-18(26-3)19-16(24)11-17(27-20(14)19)12-4-6-13(22)7-5-12/h4-10,17,22-23,25H,11H2,1-3H3/b9-8-	COc1cc(O)c(c2c1C(=O)CC(O2)c1ccc(cc1)O)/C=CC(O)(C)C	P03372	1
Sigmoidin C	Flavanones	(2S)-5,7-dihydroxy-2-(8-hydroxy-2,2-dimethylchromen-6-yl)-2,3-dihydrochromen-4-one	C20H18O6	RFBNSYVWJNUVHE-INIZCTEOSA-N	InChI=1S/C20H18O6/c1-20(2)4-3-10-5-11(6-15(24)19(10)26-20)16-9-14(23)18-13(22)7-12(21)8-17(18)25-16/h3-8,16,21-22,24H,9H2,1-2H3/t16-/m0/s1	Oc1cc2O[C@@H](CC(=O)c2c(c1)O)c1cc(O)c2c(c1)C=CC(O2)(C)C	P18031	1
Gancaonin P	Flavonols	2-(3,4-dihydroxyphenyl)-3,5,7-trihydroxy-6-(3-methylbut-2-enyl)chromen-4-one	C20H18O7	OCIIFJFJVOTFTN-UHFFFAOYSA-N	InChI=1S/C20H18O7/c1-9(2)3-5-11-13(22)8-15-16(17(11)24)18(25)19(26)20(27-15)10-4-6-12(21)14(23)7-10/h3-4,6-8,21-24,26H,5H2,1-2H3	CC(=CCc1c(O)cc2c(c1O)c(=O)c(c(o2)c1ccc(c(c1)O)O)O)C	P11511	1
Saponarin	Flavones	5,7-dihydroxy-2-(4-hydroxyphenyl)-6,8-bis[[(2S,3R,4S,5S,6R)-3,4,5-trihydroxy-6-(hydroxymethyl)oxan-2-yl]oxy]chromen-4-one	C27H30O17	CSNXTSWTBUEIJB-PXJYGDGDSA-N	InChI=1S/C27H30O17/c28-6-12-15(32)18(35)20(37)26(41-12)43-24-17(34)14-10(31)5-11(8-1-3-9(30)4-2-8)40-23(14)25(22(24)39)44-27-21(38)19(36)16(33)13(7-29)42-27/h1-5,12-13,15-16,18-21,26-30,32-39H,6-7H2/t12-,13-,15-,16-,18+,19+,20-,21-,26+,27+/m1/s1	OC[C@H]1O[C@@H](Oc2c(O)c(O[C@@H]3O[C@H](CO)[C@H]([C@@H]([C@H]3O)O)O)c(c3c2oc(cc3=O)c2ccc(cc2)O)O)[C@@H]([C@H]([C@@H]1O)O)O	Q9UGI9,P47989	2
Epigallocatechin	Flavan-3-ols	(2R,3R)-2-(3,4,5-trihydroxyphenyl)-3,4-dihydro-2H-chromene-3,5,7-triol	C15H14O7	XMOCLSLCDHWDHP-IUODEOHRSA-N	InChI=1S/C15H14O7/c16-7-3-9(17)8-5-12(20)15(22-13(8)4-7)6-1-10(18)14(21)11(19)2-6/h1-4,12,15-21H,5H2/t12-,15-/m1/s1	Oc1cc2O[C@H](c3cc(O)c(c(c3)O)O)[C@@H](Cc2c(c1)O)O	Q9NPD5,Q9Y6L6	2
Cladrin	Isoflavones	3-(3,4-dimethoxyphenyl)-7-hydroxychromen-4-one	C17H14O5	VFZIJLPRJAQGFO-UHFFFAOYSA-N	InChI=1S/C17H14O5/c1-20-14-6-3-10(7-16(14)21-2)13-9-22-15-8-11(18)4-5-12(15)17(13)19/h3-9,18H,1-2H3	COc1cc(ccc1OC)c1coc2c(c1=O)ccc(c2)O	P43220,P10636,O15118,P04637,Q99714,P38398,P51151,B2RXH2,Q96QE3,P37231	10
Isokaempferide	Flavonols	5,7-dihydroxy-2-(4-hydroxyphenyl)-3-methoxychromen-4-one	C16H12O6	VJJZJBUCDWKPLC-UHFFFAOYSA-N	InChI=1S/C16H12O6/c1-21-16-14(20)13-11(19)6-10(18)7-12(13)22-15(16)8-2-4-9(17)5-3-8/h2-7,17-19H,1H3	COc1c(oc2c(c1=O)c(O)cc(c2)O)c1ccc(cc1)O	P27695,P06746,P83916,P39748,O75164,Q07817,Q9UIF8,P10635,P46063,Q07820,Q9UNA4,Q9Y253,Q96QE3,Q9UBT6,P08684,Q16236,Q96KQ7,B2RXH2	18
Sigmoidin E	Flavanones	(2S)-2-[2,2-dimethyl-8-(3-methylbut-2-enyl)chromen-6-yl]-5,7-dihydroxy-2,3-dihydrochromen-4-one	C25H26O5	CKTMJKHXYHXNKU-NRFANRHFSA-N	InChI=1S/C25H26O5/c1-14(2)5-6-15-9-17(10-16-7-8-25(3,4)30-24(15)16)21-13-20(28)23-19(27)11-18(26)12-22(23)29-21/h5,7-12,21,26-27H,6,13H2,1-4H3/t21-/m0/s1	CC(=CCc1cc(cc2c1OC(C)(C)C=C2)[C@@H]1CC(=O)c2c(O1)cc(cc2O)O)C	P18031	1
Pelargonidin Chloride	Others	2-(4-hydroxyphenyl)chromenylium-3,5,7-triol;chloride	C15H10O5.ClH	YPVZJXMTXCOTJN-UHFFFAOYSA-N	InChI=1S/C15H10O5.ClH/c16-9-3-1-8(2-4-9)15-13(19)7-11-12(18)5-10(17)6-14(11)20-15;/h1-7H,(H3-,16,17,18,19);1H	Oc1ccc(cc1)c1[o+]c2cc(O)cc(c2cc1[O-])O.Cl	Q04760	1
Pinostrobin	Flavanones	(2S)-5-hydroxy-7-methoxy-2-phenyl-2,3-dihydrochromen-4-one	C16H14O4	ORJDDOBAOGKRJV-AWEZNQCLSA-N	InChI=1S/C16H14O4/c1-19-11-7-12(17)16-13(18)9-14(20-15(16)8-11)10-5-3-2-4-6-10/h2-8,14,17H,9H2,1H3/t14-/m0/s1	COc1cc2O[C@@H](CC(=O)c2c(c1)O)c1ccccc1	Q9UNQ0	1
b"(2S)-3,4,5,7-Tetrahydroxy-2,2-Dimethyl-2,6-Bichroman-4-One"	Flavanones	(2S)-2-(3,4-dihydroxy-2,2-dimethyl-3,4-dihydrochromen-6-yl)-5,7-dihydroxy-2,3-dihydrochromen-4-one	C20H20O7	SJILHXXGADEART-MNNVXMFVSA-N	InChI=1S/C20H20O7/c1-20(2)19(25)18(24)11-5-9(3-4-14(11)27-20)15-8-13(23)17-12(22)6-10(21)7-16(17)26-15/h3-7,15,18-19,21-22,24-25H,8H2,1-2H3/t15-,18?,19?/m0/s1	Oc1cc2O[C@@H](CC(=O)c2c(c1)O)c1ccc2c(c1)C(O)C(C(O2)(C)C)O	P18031	1
b"(2S)-2,4-Dihydroxy-2 -(1-Hydroxy-1-Methylethyl)Dihydrofuro[2,3-H]Flavanone"	Flavanones	(2S)-2-(2,4-dihydroxyphenyl)-8-(2-hydroxypropan-2-yl)-2,3,8,9-tetrahydrofuro[2,3-h]chromen-4-one	C20H20O6	JXVOAHGNNBAJCD-ZENAZSQFSA-N	InChI=1S/C20H20O6/c1-20(2,24)18-8-13-16(25-18)6-5-12-15(23)9-17(26-19(12)13)11-4-3-10(21)7-14(11)22/h3-7,17-18,21-22,24H,8-9H2,1-2H3/t17-,18?/m0/s1	Oc1ccc(c(c1)O)[C@@H]1CC(=O)c2c(O1)c1CC(Oc1cc2)C(O)(C)C	P11511	1
Catechin Pentaacetate	Flavan-3-ols	[(2R,3S)-5,7-diacetyloxy-2-(3,4-diacetyloxyphenyl)-3,4-dihydro-2H-chromen-3-yl] acetate	C25H24O11	BKYWAYNSDFXIPL-LOSJGSFVSA-N	InChI=1S/C25H24O11/c1-12(26)31-18-9-21(33-14(3)28)19-11-24(35-16(5)30)25(36-22(19)10-18)17-6-7-20(32-13(2)27)23(8-17)34-15(4)29/h6-10,24-25H,11H2,1-5H3/t24-,25+/m0/s1	CC(=O)Oc1cc2O[C@H](c3ccc(c(c3)OC(=O)C)OC(=O)C)[C@H](Cc2c(c1)OC(=O)C)OC(=O)C	Q9NPD5,Q9Y6L6	2
7-Methoxyflavone	Flavones	7-methoxy-2-phenylchromen-4-one	C16H12O3	QKNDCRMJDZLFEG-UHFFFAOYSA-N	InChI=1S/C16H12O3/c1-18-12-7-8-13-14(17)10-15(19-16(13)9-12)11-5-3-2-4-6-11/h2-10H,1H3	COc1ccc2c(c1)oc(cc2=O)c1ccccc1	O95271,P27338	2
Soulattrolide	Others	</td></tr>\r\n\t\t\t\t<tr><td align=right><b>Synonyms: &nbsp</b>	C25H24O5	BXENDTPSKAICGV-RXSFTSLZSA-N	InChI=1S/C25H24O5/c1-13-14(2)28-22-16-10-11-25(3,4)30-23(16)19-17(15-8-6-5-7-9-15)12-18(26)29-24(19)20(22)21(13)27/h5-14,21,27H,1-4H3/t13-,14-,21-/m0/s1	C[C@@H]1Oc2c3C=CC(Oc3c3c(c2[C@H]([C@H]1C)O)oc(=O)cc3c1ccccc1)(C)C	P06746,P09884	2
b"Isoquercitin 2-O-Gallate"	Flavonols	[(2S,3R,4S,5S,6R)-2-[2-(3,4-dihydroxyphenyl)-5,7-dihydroxy-4-oxochromen-3-yl]oxy-4,5-dihydroxy-6-(hydroxymethyl)oxan-3-yl] 3,4,5-trihydroxybenzoate	C28H24O16	PXGWEUQZDRUMRE-KQOASZHBSA-N	InChI=1S/C28H24O16/c29-8-18-21(37)23(39)26(43-27(40)10-4-15(34)20(36)16(35)5-10)28(42-18)44-25-22(38)19-14(33)6-11(30)7-17(19)41-24(25)9-1-2-12(31)13(32)3-9/h1-7,18,21,23,26,28-37,39H,8H2/t18-,21-,23+,26-,28+/m1/s1	OC[C@H]1O[C@@H](Oc2c(oc3c(c2=O)c(O)cc(c3)O)c2ccc(c(c2)O)O)[C@@H]([C@H]([C@@H]1O)O)OC(=O)c1cc(O)c(c(c1)O)O	P34913	1
b"(2S)-3,4,5,7,8-Pentahydroxy-2,2-Dimethyl-7-(3-Methylbut-2-Enyl)-2,6-Bichroman-4-One"	Flavanones	(2S)-5,7-dihydroxy-2-[3,4,8-trihydroxy-2,2-dimethyl-7-(3-methylbut-2-enyl)-3,4-dihydrochromen-6-yl]-2,3-dihydrochromen-4-one	C25H28O8	CNJVHHYFXJIZHZ-IYHNFFKESA-N	InChI=1S/C25H28O8/c1-11(2)5-6-13-14(9-15-22(30)24(31)25(3,4)33-23(15)21(13)29)18-10-17(28)20-16(27)7-12(26)8-19(20)32-18/h5,7-9,18,22,24,26-27,29-31H,6,10H2,1-4H3/t18-,22?,24?/m0/s1	CC(=CCc1c(cc2c(c1O)OC(C(C2O)O)(C)C)[C@@H]1CC(=O)c2c(O1)cc(cc2O)O)C	P18031	1
Delphinidin Chloride	Others	2-(3,4,5-trihydroxyphenyl)chromenylium-3,5,7-triol;chloride	C15H10O7.ClH	FFNDMZIBVDSQFI-UHFFFAOYSA-N	InChI=1S/C15H10O7.ClH/c16-7-3-9(17)8-5-12(20)15(22-13(8)4-7)6-1-10(18)14(21)11(19)2-6;/h1-5H,(H5-,16,17,18,19,20,21);1H	Oc1cc(O)c2c(c1)[o+]c(c(c2)O)c1cc(O)c(c(c1)O)[O-].Cl	Q04760	1
Moracin D	Others	7-(6-hydroxy-1-benzofuran-2-yl)-2,2-dimethylchromen-5-ol	C19H16O4	CHAAQDMHLLQJRO-UHFFFAOYSA-N	InChI=1S/C19H16O4/c1-19(2)6-5-14-15(21)7-12(9-18(14)23-19)16-8-11-3-4-13(20)10-17(11)22-16/h3-10,20-21H,1-2H3	Oc1ccc2c(c1)oc(c2)c1cc(O)c2c(c1)OC(C=C2)(C)C	P11511	1
Kurarinone	Flavanones	(2S)-2-(2,4-dihydroxyphenyl)-7-hydroxy-5-methoxy-8-(5-methyl-2-prop-1-en-2-ylhex-4-enyl)-2,3-dihydrochromen-4-one	C26H30O6	LTTQKYMNTNISSZ-KESSSICBSA-N	InChI=1S/C26H30O6/c1-14(2)6-7-16(15(3)4)10-19-21(29)12-24(31-5)25-22(30)13-23(32-26(19)25)18-9-8-17(27)11-20(18)28/h6,8-9,11-12,16,23,27-29H,3,7,10,13H2,1-2,4-5H3/t16?,23-/m0/s1	COc1cc(O)c(c2c1C(=O)C[C@H](O2)c1ccc(cc1O)O)CC(C(=C)C)CC=C(C)C	P03372,P31639,P13866,P23219,P56817	5
1,3,8-Trihydroxy-[1]Benzofuro[2,3-B]Chromen-11-One	Others	1,3,8-trihydroxy-[1]benzofuro[2,3-b]chromen-11-one	C15H8O6	BBBAWACESCACAP-UHFFFAOYSA-N	InChI=1S/C15H8O6/c16-6-1-2-8-10(4-6)20-15-12(8)14(19)13-9(18)3-7(17)5-11(13)21-15/h1-5,16-18H	Oc1ccc2c(c1)oc1c2c(=O)c2c(o1)cc(cc2O)O	Q92731,P03372	2
Baicalin	Flavones	(2S,3S,4S,5R,6S)-6-(5,6-dihydroxy-4-oxo-2-phenylchromen-7-yl)oxy-3,4,5-trihydroxyoxane-2-carboxylic acid	C21H18O11	IKIIZLYTISPENI-ZFORQUDYSA-N	InChI=1S/C21H18O11/c22-9-6-10(8-4-2-1-3-5-8)30-11-7-12(14(23)15(24)13(9)11)31-21-18(27)16(25)17(26)19(32-21)20(28)29/h1-7,16-19,21,23-27H,(H,28,29)/t16-,17-,18+,19-,21+/m0/s1	OC(=O)[C@H]1O[C@@H](Oc2cc3oc(cc(=O)c3c(c2O)O)c2ccccc2)[C@@H]([C@H]([C@@H]1O)O)O	Q9NPD5,Q9Y6L6,P06493,P27487,P34969,P48147,Q92887,P03372,Q16445,O94956,P35030	11
Tetramethylscutellarein	Flavones	5,6,7-trimethoxy-2-(4-methoxyphenyl)chromen-4-one	C19H18O6	URSUMOWUGDXZHU-UHFFFAOYSA-N	InChI=1S/C19H18O6/c1-21-12-7-5-11(6-8-12)14-9-13(20)17-15(25-14)10-16(22-2)18(23-3)19(17)24-4/h5-10H,1-4H3	COc1ccc(cc1)c1cc(=O)c2c(o1)cc(c(c2OC)OC)OC	P43220,P00352,Q13148,Q96QE3,Q03164,Q16236,Q9UNA4	7
(+/-)-Furowanin	Isoflavones	3-(3,4-dihydroxyphenyl)-5-hydroxy-8-(2-hydroxypropan-2-yl)-6-(3-methylbut-2-enyl)-8,9-dihydrofuro[2,3-h]chromen-4-one	C25H26O7	YOKJEIDBLPWOSL-UHFFFAOYSA-N	InChI=1S/C25H26O7/c1-12(2)5-7-14-21(28)20-22(29)16(13-6-8-17(26)18(27)9-13)11-31-24(20)15-10-19(25(3,4)30)32-23(14)15/h5-6,8-9,11,19,26-28,30H,7,10H2,1-4H3	CC(=CCc1c2OC(Cc2c2c(c1O)c(=O)c(co2)c1ccc(c(c1)O)O)C(O)(C)C)C	P03372	1
b"5,7,2,4-Tetrahydroxy-3-Geranylflavone"	Flavones	2-(2,4-dihydroxyphenyl)-3-[(2E)-3,7-dimethylocta-2,6-dienyl]-5,7-dihydroxychromen-4-one	C25H26O6	GRRICQNASNJYBZ-VIZOYTHASA-N	InChI=1S/C25H26O6/c1-14(2)5-4-6-15(3)7-9-19-24(30)23-21(29)12-17(27)13-22(23)31-25(19)18-10-8-16(26)11-20(18)28/h5,7-8,10-13,26-29H,4,6,9H2,1-3H3/b15-7+	C/C(=CCc1c(oc2c(c1=O)c(O)cc(c2)O)c1ccc(cc1O)O)/CCC=C(C)C	P11511	1
Gneyulin A	Others	4-[(E)-2-[(2R,3R)-3-(3,5-dihydroxyphenyl)-2-[(2R,3R)-2-(2,4-dihydroxyphenyl)-3-(3,5-dihydroxyphenyl)-6-hydroxy-2,3-dihydro-1-benzofuran-5-yl]-4-hydroxy-2,3-dihydro-1-benzofuran-6-yl]ethenyl]benzene-1,3-diol	C42H32O12	ICXRYDWDNDYFEC-LUJHVKMYSA-N	InChI=1S/C42H32O12/c43-23-4-3-20(32(49)15-23)2-1-19-7-35(52)40-37(8-19)54-42(39(40)22-11-27(47)14-28(48)12-22)30-17-31-36(18-34(30)51)53-41(29-6-5-24(44)16-33(29)50)38(31)21-9-25(45)13-26(46)10-21/h1-18,38-39,41-52H/b2-1+/t38-,39-,41+,42+/m1/s1	Oc1cc(O)cc(c1)[C@@H]1c2c(O[C@H]1c1cc3c(cc1O)O[C@H]([C@@H]3c1cc(O)cc(c1)O)c1ccc(cc1O)O)cc(cc2O)/C=C/c1ccc(cc1O)O	P31639,P13866	2
Kazinol	Others	6-[(2S)-7-hydroxy-3,4-dihydro-2H-chromen-2-yl]-2,2-dimethyl-7-(3-methylbut-2-enyl)chromen-8-ol	C25H28O4	QSCBHDIGHKHWKC-NRFANRHFSA-N	InChI=1S/C25H28O4/c1-15(2)5-9-19-20(13-17-11-12-25(3,4)29-24(17)23(19)27)21-10-7-16-6-8-18(26)14-22(16)28-21/h5-6,8,11-14,21,26-27H,7,9-10H2,1-4H3/t21-/m0/s1	CC(=CCc1c(cc2c(c1O)OC(C=C2)(C)C)[C@@H]1CCc2c(O1)cc(cc2)O)C	P35354,O75496,Q13526,P84022,Q13148	5
3,4,5-Trihydroxy-Benzoic Acid (2R,3S)-5,7-Dihydroxy-2-(3,4,5-Trihydroxy-Phenyl)-Chroman-3-Yl Ester	Flavan-3-ols	[(2R,3S)-5,7-dihydroxy-2-(3,4,5-trihydroxyphenyl)-3,4-dihydro-2H-chromen-3-yl] 3,4,5-trihydroxybenzoate	C22H18O11	WMBWREPUVVBILR-GHTZIAJQSA-N	InChI=1S/C22H18O11/c23-10-5-12(24)11-7-18(33-22(31)9-3-15(27)20(30)16(28)4-9)21(32-17(11)6-10)8-1-13(25)19(29)14(26)2-8/h1-6,18,21,23-30H,7H2/t18-,21+/m0/s1	Oc1cc(O)c2c(c1)O[C@@H]([C@H](C2)OC(=O)c1cc(O)c(c(c1)O)O)c1cc(O)c(c(c1)O)O	P56817	1
Ohioensin G	Others	</td></tr>\r\n\t\t\t\t<tr><td align=right><b>Synonyms: &nbsp</b>	C23H16O6	JFOHOILWNMBZGW-QSABTFIQSA-N	InChI=1S/C23H16O6/c24-11-6-3-5-10-15(11)17-12(25)8-13(26)18-19(17)20-16(21(27)22(18)28)9-4-1-2-7-14(9)29-23(10)20/h1-8,16,20-21,23-27H/t16-,20+,21-,23+/m1/s1	Oc1cc(O)c2c3c1C(=O)[C@H](O)[C@H]1[C@@H]3[C@H](c3c2c(O)ccc3)Oc2c1cccc2	P18031	1
Kurarinol	Flavanones	(2S)-2-(2,4-dihydroxyphenyl)-7-hydroxy-8-[(2R)-5-hydroxy-5-methyl-2-prop-1-en-2-ylhexyl]-5-methoxy-2,3-dihydrochromen-4-one	C26H32O7	XMUPAAIHKAIUSU-QRQCRPRQSA-N	InChI=1S/C26H32O7/c1-14(2)15(8-9-26(3,4)31)10-18-20(29)12-23(32-5)24-21(30)13-22(33-25(18)24)17-7-6-16(27)11-19(17)28/h6-7,11-12,15,22,27-29,31H,1,8-10,13H2,2-5H3/t15-,22+/m1/s1	COc1cc(O)c(c2c1C(=O)C[C@H](O2)c1ccc(cc1O)O)C[C@H](C(=C)C)CCC(O)(C)C	P56817	1
2-(3,4-Dihydroxyphenyl)-5,7-Dihydroxy-3-[(2S,3R,4S,5S,6R)-3,4,5-Trihydroxy-6-[[(2R,3R,4R,5R,6S)-3,4,5-Trihydroxy-6-Methyloxan-2-Yl]Oxymethyl]Oxan-2-Yl]Oxychromen-4-One;Hydrate	Flavonols	2-(3,4-dihydroxyphenyl)-5,7-dihydroxy-3-[(2S,3R,4S,5S,6R)-3,4,5-trihydroxy-6-[[(2R,3R,4R,5R,6S)-3,4,5-trihydroxy-6-methyloxan-2-yl]oxymethyl]oxan-2-yl]oxychromen-4-one;hydrate	C27H30O16.H2O	PGHSKTKIQIBATG-ZAAWVBGYSA-N	InChI=1S/C27H30O16.H2O/c1-8-17(32)20(35)22(37)26(40-8)39-7-15-18(33)21(36)23(38)27(42-15)43-25-19(34)16-13(31)5-10(28)6-14(16)41-24(25)9-2-3-11(29)12(30)4-9;/h2-6,8,15,17-18,20-23,26-33,35-38H,7H2,1H3;1H2/t8-,15+,17-,18+,20+,21-,22+,23+,26+,27-;/m0./s1	Oc1cc(O)c2c(c1)oc(c(c2=O)O[C@@H]1O[C@H](CO[C@@H]2O[C@@H](C)[C@@H]([C@H]([C@H]2O)O)O)[C@H]([C@@H]([C@H]1O)O)O)c1ccc(c(c1)O)O.O	P83916,O94925,O75496,P07237,Q99700	5
7-Hydroxy-3-(4-Hydroxyphenyl)-5-Methoxychromen-4-One	Isoflavones	7-hydroxy-3-(4-hydroxyphenyl)-5-methoxychromen-4-one	C16H12O5	YSINCDVRUMTOPK-UHFFFAOYSA-N	InChI=1S/C16H12O5/c1-20-13-6-11(18)7-14-15(13)16(19)12(8-21-14)9-2-4-10(17)5-3-9/h2-8,17-18H,1H3	COc1cc(O)cc2c1c(=O)c(co2)c1ccc(cc1)O	P43220,P06746,O75496,Q9UNA4,B2RXH2,Q96QE3	6
Taxifolin	Flavanonol	2-(3,4-dihydroxyphenyl)-3,5,7-trihydroxy-2,3-dihydrochromen-4-one	C15H12O7	CXQWRCVTCMQVQX-UHFFFAOYSA-N	InChI=1S/C15H12O7/c16-7-4-10(19)12-11(5-7)22-15(14(21)13(12)20)6-1-2-8(17)9(18)3-6/h1-5,14-19,21H	Oc1cc2OC(c3ccc(c(c3)O)O)C(C(=O)c2c(c1)O)O	P15289,P11021,P06746,P14780,P43166,P47989,P0DMS8,P21728,P83916,P39748,P45452,P08254,Q92887,P11511,Q13526,P54132,P46063,Q9UNA4,Q01453,P22748,Q9Y253,O43570,P49798,Q9UBT6,Q03164,P10636,P15428,P09917,P08253,P39900,Q96KQ7,B2RXH2	32
b"Procyanidin B-2 3,3-Di-O-Gallate"	Flavan-3-ols	[(2R,3R)-2-(3,4-dihydroxyphenyl)-8-[(2R,3R,4R)-2-(3,4-dihydroxyphenyl)-5,7-dihydroxy-3-(3,4,5-trihydroxybenzoyl)oxy-3,4-dihydro-2H-chromen-4-yl]-5,7-dihydroxy-3,4-dihydro-2H-chromen-3-yl] 3,4,5-trihydroxybenzoate	C44H34O20	KTLUHRSHFRODPS-RIQPQZJCSA-N	InChI=1S/C44H34O20/c45-19-11-26(51)34-32(12-19)61-40(16-2-4-22(47)25(50)6-16)42(64-44(60)18-9-30(55)38(58)31(56)10-18)36(34)35-27(52)14-23(48)20-13-33(62-43(59)17-7-28(53)37(57)29(54)8-17)39(63-41(20)35)15-1-3-21(46)24(49)5-15/h1-12,14,33,36,39-40,42,45-58H,13H2/t33-,36-,39-,40-,42-/m1/s1	Oc1cc(O)c2c(c1)O[C@@H]([C@@H]([C@H]2c1c(O)cc(c2c1O[C@@H]([C@@H](C2)OC(=O)c1cc(O)c(c(c1)O)O)c1ccc(c(c1)O)O)O)OC(=O)c1cc(O)c(c(c1)O)O)c1ccc(c(c1)O)O	Q04759	1
n.a.	Flavan-3-ols	</td></tr>\r\n\t\t\t\t<tr><td align=right><b>Synonyms: &nbsp</b>	C36H42N2O9	ZPZIOXSKRNWLQT-YFLBEWKFSA-N	InChI=1S/C36H42N2O9/c1-22(16-19-39)32(40)37-17-8-9-18-38-33(41)31-29(23-10-6-5-7-11-23)35(43)30-27(46-4)20-26(45-3)21-28(30)47-36(31,34(35)42)24-12-14-25(44-2)15-13-24/h5-7,10-16,20-21,29,31,34,39,42-43H,8-9,17-19H2,1-4H3,(H,37,40)(H,38,41)/b22-16+/t29-,31+,34?,35-,36+/m0/s1	OC/C=C(/C(=NCCCCN=C([C@H]1[C@H](c2ccccc2)[C@]2(C([C@@]1(Oc1c2c(OC)cc(c1)OC)c1ccc(cc1)OC)O)O)O)O)C	Q04206	1
Cyanidin Chloride	Others	2-(3,4-dihydroxyphenyl)chromenylium-3,5,7-triol;chloride	C15H10O6.ClH	COAWNPJQKJEHPG-UHFFFAOYSA-N	InChI=1S/C15H10O6.ClH/c16-8-4-11(18)9-6-13(20)15(21-14(9)5-8)7-1-2-10(17)12(19)3-7;/h1-6H,(H4-,16,17,18,19,20);1H	Oc1cc(O)c2c(c1)[o+]c(c(c2)[O-])c1ccc(c(c1)O)O.Cl	Q04760	1
Erythraddison I	Isoflavones	10-(2,3-dihydroxy-1-methoxy-3-methylbutyl)-5-hydroxy-7-(4-hydroxyphenyl)-2,2-dimethylpyrano[3,2-g]chromen-6-one	C26H28O8	LZZOZGIVJWVVNH-UHFFFAOYSA-N	InChI=1S/C26H28O8/c1-25(2)11-10-15-19(28)17-20(29)16(13-6-8-14(27)9-7-13)12-33-22(17)18(21(15)34-25)23(32-5)24(30)26(3,4)31/h6-12,23-24,27-28,30-31H,1-5H3	COC(C(C(O)(C)C)O)c1c2OC(C)(C)C=Cc2c(c2c1occ(c2=O)c1ccc(cc1)O)O	P18031	1
Itoside N	Flavones	</td></tr>\r\n\t\t\t\t<tr><td align=right><b>Synonyms: &nbsp</b>	C39H32O14	FJUGWGGYGGSGCO-FAXYJIGKSA-N	InChI=1S/C39H32O14/c40-20-7-1-17(2-8-20)26-15-25(44)31-24(43)13-23(14-27(31)51-26)50-39-35(46)34(45)36-28(52-39)16-49-37(47)32-29(18-3-9-21(41)10-4-18)30(33(32)38(48)53-36)19-5-11-22(42)12-6-19/h1-15,28-30,32-36,39-43,45-46H,16H2/t28-,29-,30+,32+,33-,34-,35-,36-,39-/m1/s1	Oc1ccc(cc1)[C@@H]1[C@H]2C(=O)O[C@@H]3[C@@H](COC(=O)[C@H]2[C@@H]1c1ccc(cc1)O)O[C@H]([C@@H]([C@H]3O)O)Oc1cc(O)c2c(c1)oc(cc2=O)c1ccc(cc1)O	P35354	1
b"4-Isobutyrylhomoeriodictyol"	Flavanones	[4-[(2S)-5,7-dihydroxy-4-oxo-2,3-dihydrochromen-2-yl]-2-methoxyphenyl] 2-methylpropanoate	C20H20O7	IGCZWOGVHOOOEO-INIZCTEOSA-N	InChI=1S/C20H20O7/c1-10(2)20(24)27-15-5-4-11(6-17(15)25-3)16-9-14(23)19-13(22)7-12(21)8-18(19)26-16/h4-8,10,16,21-22H,9H2,1-3H3/t16-/m0/s1	COc1cc(ccc1OC(=O)C(C)C)[C@@H]1CC(=O)c2c(O1)cc(cc2O)O	P59538	1
Mulberrofuran W	Others	5-(6-hydroxy-1-benzofuran-2-yl)-4-[(2Z,6Z)-3,7,11-trimethyldodeca-2,6,10-trienyl]benzene-1,3-diol	C29H34O4	YUFBSQFJPYHMTK-QUYCRGELSA-N	InChI=1S/C29H34O4/c1-19(2)7-5-8-20(3)9-6-10-21(4)11-14-25-26(16-24(31)17-27(25)32)29-15-22-12-13-23(30)18-28(22)33-29/h7,9,11-13,15-18,30-32H,5-6,8,10,14H2,1-4H3/b20-9-,21-11-	C/C(=C/Cc1c(O)cc(cc1c1oc2c(c1)ccc(c2)O)O)/CC/C=C(CCC=C(C)C)/C	P18031	1
Angustone A	Isoflavones	3-[2,4-dihydroxy-3-(3-methylbut-2-enyl)phenyl]-5,7-dihydroxy-6-(3-methylbut-2-enyl)chromen-4-one	C25H26O6	KKFAKKIIFUFASS-UHFFFAOYSA-N	InChI=1S/C25H26O6/c1-13(2)5-7-16-19(26)10-9-15(23(16)28)18-12-31-21-11-20(27)17(8-6-14(3)4)24(29)22(21)25(18)30/h5-6,9-12,26-29H,7-8H2,1-4H3	CC(=CCc1c(O)ccc(c1O)c1coc2c(c1=O)c(O)c(c(c2)O)CC=C(C)C)C	P18031,P22303	2
Skullcapflavone Ii	Flavones	5-hydroxy-2-(2-hydroxy-6-methoxyphenyl)-6,7,8-trimethoxychromen-4-one	C19H18O8	GMQFOKBGMKVUQZ-UHFFFAOYSA-N	InChI=1S/C19H18O8/c1-23-11-7-5-6-9(20)13(11)12-8-10(21)14-15(22)17(24-2)19(26-4)18(25-3)16(14)27-12/h5-8,20,22H,1-4H3	COc1cccc(c1c1cc(=O)c2c(o1)c(OC)c(c(c2O)OC)OC)O	P35030	1
Diosmin	Flavones	5-hydroxy-2-(3-hydroxy-4-methoxyphenyl)-7-[(2S,3R,4S,5S,6R)-3,4,5-trihydroxy-6-[[(2R,3R,4R,5R,6S)-3,4,5-trihydroxy-6-methyloxan-2-yl]oxymethyl]oxan-2-yl]oxychromen-4-one	C28H32O15	GZSOSUNBTXMUFQ-YFAPSIMESA-N	InChI=1S/C28H32O15/c1-10-21(32)23(34)25(36)27(40-10)39-9-19-22(33)24(35)26(37)28(43-19)41-12-6-14(30)20-15(31)8-17(42-18(20)7-12)11-3-4-16(38-2)13(29)5-11/h3-8,10,19,21-30,32-37H,9H2,1-2H3/t10-,19+,21-,22+,23+,24-,25+,26+,27+,28+/m0/s1	COc1ccc(cc1O)c1cc(=O)c2c(o1)cc(cc2O)O[C@@H]1O[C@H](CO[C@@H]2O[C@@H](C)[C@@H]([C@H]([C@H]2O)O)O)[C@H]([C@@H]([C@H]1O)O)O	O94782,Q92830,P06746,Q9NPD5,Q9Y6L6,P39748,O75496,Q9Y253,Q96QE3,Q03164,Q9UBT6,Q16236,Q03164,Q9UNA4	14
Sophoraflavanone G	Flavanones	(2S)-2-(2,4-dihydroxyphenyl)-5,7-dihydroxy-8-[(2R)-5-methyl-2-prop-1-en-2-ylhex-4-enyl]-2,3-dihydrochromen-4-one	C25H28O6	XRYVAQQLDYTHCL-CMJOXMDJSA-N	InChI=1S/C25H28O6/c1-13(2)5-6-15(14(3)4)9-18-20(28)11-21(29)24-22(30)12-23(31-25(18)24)17-8-7-16(26)10-19(17)27/h5,7-8,10-11,15,23,26-29H,3,6,9,12H2,1-2,4H3/t15-,23+/m1/s1	CC(=CC[C@@H](C(=C)C)Cc1c(O)cc(c2c1O[C@@H](CC2=O)c1ccc(cc1O)O)O)C	P31639,P13866,P56817	3
5,7-Dihydroxy-3,6,8-Trimethoxy-2-(3,4,5-Trimethoxyphenyl)Chromen-4-One	Flavonols	5,7-dihydroxy-3,6,8-trimethoxy-2-(3,4,5-trimethoxyphenyl)chromen-4-one	C21H22O10	QXRNWRWFNALYGH-UHFFFAOYSA-N	InChI=1S/C21H22O10/c1-25-10-7-9(8-11(26-2)17(10)27-3)16-20(29-5)14(23)12-13(22)19(28-4)15(24)21(30-6)18(12)31-16/h7-8,22,24H,1-6H3	COc1c(OC)cc(cc1OC)c1oc2c(OC)c(O)c(c(c2c(=O)c1OC)O)OC	Q9BUF5	1
Moracin O	Others	5-[6-(2-hydroxypropan-2-yl)-5,6-dihydrofuro[3,2-f][1]benzofuran-2-yl]benzene-1,3-diol	C19H18O5	HMTMYIWMPJSCAZ-UHFFFAOYSA-N	InChI=1S/C19H18O5/c1-19(2,22)18-7-11-3-10-6-15(23-16(10)9-17(11)24-18)12-4-13(20)8-14(21)5-12/h3-6,8-9,18,20-22H,7H2,1-2H3	Oc1cc(O)cc(c1)c1oc2c(c1)cc1c(c2)OC(C1)C(O)(C)C	P18031,Q16665	2
Diosmetin	Flavones	5,7-dihydroxy-2-(3-hydroxy-4-methoxyphenyl)chromen-4-one	C16H12O6	MBNGWHIJMBWFHU-UHFFFAOYSA-N	InChI=1S/C16H12O6/c1-21-13-3-2-8(4-10(13)18)14-7-12(20)16-11(19)5-9(17)6-15(16)22-14/h2-7,17-19H,1H3	COc1ccc(cc1O)c1cc(=O)c2c(o1)cc(cc2O)O	P27695,Q07869,Q03181,Q9NPD5,Q9Y6L6,P05177,P04745,P04798,Q16678,Q92887,P37231	11
5,7-Dihydroxy-2-(4-Hydroxyphenyl)-6-[3,4,5-Trihydroxy-6-(Hydroxymethyl)Oxan-2-Yl]Chromen-4-One	Flavones	5,7-dihydroxy-2-(4-hydroxyphenyl)-6-[3,4,5-trihydroxy-6-(hydroxymethyl)oxan-2-yl]chromen-4-one	C21H20O10	MYXNWGACZJSMBT-UHFFFAOYSA-N	InChI=1S/C21H20O10/c22-7-14-17(26)19(28)20(29)21(31-14)16-11(25)6-13-15(18(16)27)10(24)5-12(30-13)8-1-3-9(23)4-2-8/h1-6,14,17,19-23,25-29H,7H2	OCC1OC(C(C(C1O)O)O)c1c(O)cc2c(c1O)c(=O)cc(o2)c1ccc(cc1)O	P27695,Q13951,Q9Y468,Q9UBT6,O75164,P30989,P06746,Q13526,Q16236,Q9UIF8,P46063,Q9UNA4,B2RXH2,Q9NR56,Q9Y253,Q96QE3	16
8-(2,4-Dihydroxyphenyl)-5-Hydroxy-2,2-Dimethylpyrano[3,2-G]Chromen-6-One	Flavones	8-(2,4-dihydroxyphenyl)-5-hydroxy-2,2-dimethylpyrano[3,2-g]chromen-6-one	C20H16O6	LXEJWVDCRDILQQ-UHFFFAOYSA-N	InChI=1S/C20H16O6/c1-20(2)6-5-12-16(26-20)9-17-18(19(12)24)14(23)8-15(25-17)11-4-3-10(21)7-13(11)22/h3-9,21-22,24H,1-2H3	Oc1ccc(c(c1)O)c1cc(=O)c2c(o1)cc1c(c2O)C=CC(O1)(C)C	O75908	1
Isoquercetin	Flavonols	2-(3,4-dihydroxyphenyl)-5,7-dihydroxy-3-[(2S,3R,4S,5S,6R)-3,4,5-trihydroxy-6-(hydroxymethyl)oxan-2-yl]oxychromen-4-one	C21H20O12	OVSQVDMCBVZWGM-QSOFNFLRSA-N	InChI=1S/C21H20O12/c22-6-13-15(27)17(29)18(30)21(32-13)33-20-16(28)14-11(26)4-8(23)5-12(14)31-19(20)7-1-2-9(24)10(25)3-7/h1-5,13,15,17-18,21-27,29-30H,6H2/t13-,15-,17+,18-,21+/m1/s1	OC[C@H]1O[C@@H](Oc2c(oc3c(c2=O)c(O)cc(c3)O)c2ccc(c(c2)O)O)[C@@H]([C@H]([C@@H]1O)O)O	P27695,P15121,P00747,P06746,P35354,P43166,P47989,P09923,P36888,B2RXH2,P10696,P34913,P22748,O43570,P10636,P05186,P00918,Q96KQ7,P10253	19
Abyssinin Ii	Flavanones	(2S)-5,7-dihydroxy-2-[4-hydroxy-3-methoxy-5-(3-methylbut-2-enyl)phenyl]-2,3-dihydrochromen-4-one	C21H22O6	UQFQODVSORPELA-KRWDZBQOSA-N	InChI=1S/C21H22O6/c1-11(2)4-5-12-6-13(7-19(26-3)21(12)25)17-10-16(24)20-15(23)8-14(22)9-18(20)27-17/h4,6-9,17,22-23,25H,5,10H2,1-3H3/t17-/m0/s1	COc1cc(cc(c1O)CC=C(C)C)[C@@H]1CC(=O)c2c(O1)cc(cc2O)O	P18031	1
Ochnaflavone	Flavones	2-[4-[5-(5,7-dihydroxy-4-oxochromen-2-yl)-2-hydroxyphenoxy]phenyl]-5,7-dihydroxychromen-4-one	C30H18O10	NNPGECDACGBKDH-UHFFFAOYSA-N	InChI=1S/C30H18O10/c31-16-8-20(34)29-22(36)12-24(39-27(29)10-16)14-1-4-18(5-2-14)38-26-7-15(3-6-19(26)33)25-13-23(37)30-21(35)9-17(32)11-28(30)40-25/h1-13,31-35H	Oc1cc(O)c2c(c1)oc(cc2=O)c1ccc(cc1)Oc1cc(ccc1O)c1cc(=O)c2c(o1)cc(cc2O)O	P14555	1
b"3-Deoxysappanone A"	Others	(3E)-7-hydroxy-3-[(4-hydroxyphenyl)methylidene]chromen-4-one	C16H12O4	CWFKSHWAQPOKQP-YRNVUSSQSA-N	InChI=1S/C16H12O4/c17-12-3-1-10(2-4-12)7-11-9-20-15-8-13(18)5-6-14(15)16(11)19/h1-8,17-18H,9H2/b11-7+	Oc1ccc(cc1)/C=C/1COc2c(C1=O)ccc(c2)O	P10721,P12931,P11362,P00533,P08581,P35968	6
2-(2,4-Dihydroxyphenyl)-5,7-Dihydroxy-6-(3-Methylbut-2-Enyl)Chromen-4-One	Flavones	2-(2,4-dihydroxyphenyl)-5,7-dihydroxy-6-(3-methylbut-2-enyl)chromen-4-one	C20H18O6	YWUVFGZTDLJVCR-UHFFFAOYSA-N	InChI=1S/C20H18O6/c1-10(2)3-5-13-15(23)8-18-19(20(13)25)16(24)9-17(26-18)12-6-4-11(21)7-14(12)22/h3-4,6-9,21-23,25H,5H2,1-2H3	CC(=CCc1c(O)cc2c(c1O)c(=O)cc(o2)c1ccc(cc1O)O)C	P31749	1
Kaempferol 3-O-Beta-D-Glucopyranosyl-7-O-Alpha-L-Rhamnopyranoside	Flavonols	5-hydroxy-2-(4-hydroxyphenyl)-3-[(2S,3R,4S,5S,6R)-3,4,5-trihydroxy-6-(hydroxymethyl)oxan-2-yl]oxy-7-[(2S,3R,4R,5R,6S)-3,4,5-trihydroxy-6-methyloxan-2-yl]oxychromen-4-one	C27H30O15	JYXSWDCPHRTYGU-RVCYDTIBSA-N	InChI=1S/C27H30O15/c1-9-17(31)20(34)22(36)26(38-9)39-12-6-13(30)16-14(7-12)40-24(10-2-4-11(29)5-3-10)25(19(16)33)42-27-23(37)21(35)18(32)15(8-28)41-27/h2-7,9,15,17-18,20-23,26-32,34-37H,8H2,1H3/t9-,15+,17-,18+,20+,21-,22+,23+,26-,27-/m0/s1	OC[C@H]1O[C@@H](Oc2c(oc3c(c2=O)c(O)cc(c3)O[C@@H]2O[C@@H](C)[C@@H]([C@H]([C@H]2O)O)O)c2ccc(cc2)O)[C@@H]([C@H]([C@@H]1O)O)O	P11388,P11387	2
Phlorizin	Others	1-[2,4-dihydroxy-6-[(2S,3R,4S,5S,6R)-3,4,5-trihydroxy-6-(hydroxymethyl)oxan-2-yl]oxyphenyl]-3-(4-hydroxyphenyl)propan-1-one	C21H24O10	IOUVKUPGCMBWBT-QNDFHXLGSA-N	InChI=1S/C21H24O10/c22-9-16-18(27)19(28)20(29)21(31-16)30-15-8-12(24)7-14(26)17(15)13(25)6-3-10-1-4-11(23)5-2-10/h1-2,4-5,7-8,16,18-24,26-29H,3,6,9H2/t16-,18-,19+,20-,21-/m1/s1	OC[C@H]1O[C@@H](Oc2cc(O)cc(c2C(=O)CCc2ccc(cc2)O)O)[C@@H]([C@H]([C@@H]1O)O)O	Q92830,Q9NPD5,Q9Y6L6,P13866,Q9NY91,P31639,Q99808,O00337,P34913,P15428,Q9HAS3,O43868	12
b"Myricetin 3,3,4-Trimethylether"	Flavonols	5,7-dihydroxy-2-(3-hydroxy-4,5-dimethoxyphenyl)-3-methoxychromen-4-one	C18H16O8	YTYFGDJADQYGLC-UHFFFAOYSA-N	InChI=1S/C18H16O8/c1-23-13-5-8(4-11(21)17(13)24-2)16-18(25-3)15(22)14-10(20)6-9(19)7-12(14)26-16/h4-7,19-21H,1-3H3	COc1c(O)cc(cc1OC)c1oc2cc(O)cc(c2c(=O)c1OC)O	O14763	1
b"4,5,7-Trihydroxy-6,8-Dimethylisoflavone"	Isoflavones	5,7-dihydroxy-3-(4-hydroxyphenyl)-6,8-dimethylchromen-4-one	C17H14O5	VSEIMGCATUFLSE-UHFFFAOYSA-N	InChI=1S/C17H14O5/c1-8-14(19)9(2)17-13(15(8)20)16(21)12(7-22-17)10-3-5-11(18)6-4-10/h3-7,18-20H,1-2H3	Oc1ccc(cc1)c1coc2c(c1=O)c(O)c(c(c2C)O)C	Q92731,P03372	2
Glycybenzofuran	Others	4-(6-hydroxy-3-methyl-1-benzofuran-2-yl)-5-methoxy-6-(3-methylbut-2-enyl)benzene-1,3-diol	C21H22O5	OEIIVGQLDAYZNT-UHFFFAOYSA-N	InChI=1S/C21H22O5/c1-11(2)5-7-15-16(23)10-17(24)19(21(15)25-4)20-12(3)14-8-6-13(22)9-18(14)26-20/h5-6,8-10,22-24H,7H2,1-4H3	COc1c(CC=C(C)C)c(O)cc(c1c1oc2c(c1C)ccc(c2)O)O	P18031,P17706,P51452	3
Myricetin	Flavonols	3,5,7-trihydroxy-2-(3,4,5-trihydroxyphenyl)chromen-4-one	C15H10O8	IKMDFBPHZNJCSN-UHFFFAOYSA-N	InChI=1S/C15H10O8/c16-6-3-7(17)11-10(4-6)23-15(14(22)13(11)21)5-1-8(18)12(20)9(19)2-5/h1-4,16-20,22H	Oc1cc(O)c2c(c1)oc(c(c2=O)O)c1cc(O)c(c(c1)O)O	P28907,P47989,Q08493,P42345,P39748,Q15746,P16050,Q13526,Q99714,Q9Y253,P10636,P05186,P27695,P31941,P06276,P33261,P29372,P55210,P48736,P11511,P00352,P05067,Q9Y468,P04745,P10696,Q01453,P11388,O75874,P49798,Q03164,P05177,Q96KQ7,P33527,Q9UNA4,P56817,P15121,P35354,Q9HC97,Q9NUW8,P27487,P36888,P22303,Q9Y3R4,P11309,Q04760,P08238,Q03164,Q16678,B2RXH2,P15289,P04062,P53350,Q99549,Q9HC16,Q92887,P43405,P46063,…	62
Quercetin	Flavonols	2-(3,4-dihydroxyphenyl)-3,5,7-trihydroxychromen-4-one	C15H10O7	REFJWTPEDVJJIY-UHFFFAOYSA-N	InChI=1S/C15H10O7/c16-7-4-10(19)12-11(5-7)22-15(14(21)13(12)20)6-1-2-8(17)9(18)3-6/h1-5,16-19,21H	Oc1cc(O)c2c(c1)oc(c(c2=O)O)c1ccc(c(c1)O)O	P28907,P14780,P06746,P43166,P47989,P31749,P51679,P24941,P21728,P39748,P10632,P16050,Q9NWT6,P14635,P06737,P22309,O00141,P02545,P45983,Q13526,Q99714,P10635,P28482,P49841,P11712,P10636,P05412,P06239,P27695,P51955,O60285,P19838,P35218,Q9HAW9,Q9NPD5,Q9Y6L6,P06276,P33261,P25024,Q00613,P14679,P17252,P48736,Q16512,P23219,P00734,P00915,P05067,Q16539,P68400,P51589,P16473,P24385,O95067,P04745,Q01453,P34913,…	142
b"5,7,4-Tri-O-Methylkaempferol"	Flavonols	3-hydroxy-5,7-dimethoxy-2-(4-methoxyphenyl)chromen-4-one	C18H16O6	SGPXJCVFCJANKN-UHFFFAOYSA-N	InChI=1S/C18H16O6/c1-21-11-6-4-10(5-7-11)18-17(20)16(19)15-13(23-3)8-12(22-2)9-14(15)24-18/h4-9,20H,1-3H3	COc1ccc(cc1)c1oc2cc(OC)cc(c2c(=O)c1O)OC	Q9UNQ0,Q04206	2
Topazolin	Flavonols	5,7-dihydroxy-2-(4-hydroxyphenyl)-3-methoxy-6-(3-methylbut-2-enyl)chromen-4-one	C21H20O6	VVXGFIWLFZMBCJ-UHFFFAOYSA-N	InChI=1S/C21H20O6/c1-11(2)4-9-14-15(23)10-16-17(18(14)24)19(25)21(26-3)20(27-16)12-5-7-13(22)8-6-12/h4-8,10,22-24H,9H2,1-3H3	COc1c(oc2c(c1=O)c(O)c(c(c2)O)CC=C(C)C)c1ccc(cc1)O	P18031	1
b"(S)-5,7,8-Trihydroxy-2,2-Dimethyl-2,6-Bichroman-4,4-Dione"	Flavanones	6-[(2S)-5,7-dihydroxy-4-oxo-2,3-dihydrochromen-2-yl]-8-hydroxy-2,2-dimethyl-3H-chromen-4-one	C20H18O7	QVJWSGOMMDXZOF-INIZCTEOSA-N	InChI=1S/C20H18O7/c1-20(2)8-15(25)11-3-9(4-14(24)19(11)27-20)16-7-13(23)18-12(22)5-10(21)6-17(18)26-16/h3-6,16,21-22,24H,7-8H2,1-2H3/t16-/m0/s1	Oc1cc2O[C@@H](CC(=O)c2c(c1)O)c1cc(O)c2c(c1)C(=O)CC(O2)(C)C	P18031	1
b"3,4,5,7-Tetrahydroxy-6-(3,3-Dimethylallyl)-Flavone"	Flavones	2-(3,4-dihydroxyphenyl)-5,7-dihydroxy-6-(3-methylbut-2-enyl)chromen-4-one	C20H18O6	AFJYQKPCJLMHCC-UHFFFAOYSA-N	InChI=1S/C20H18O6/c1-10(2)3-5-12-14(22)8-18-19(20(12)25)16(24)9-17(26-18)11-4-6-13(21)15(23)7-11/h3-4,6-9,21-23,25H,5H2,1-2H3	CC(=CCc1c(O)cc2c(c1O)c(=O)cc(o2)c1ccc(c(c1)O)O)C	P31749	1
(-)-Catechin	Flavan-3-ols	(2S,3R)-2-(3,4-dihydroxyphenyl)-3,4-dihydro-2H-chromene-3,5,7-triol	C15H14O6	PFTAWBLQPZVEMU-HIFRSBDPSA-N	InChI=1S/C15H14O6/c16-8-4-11(18)9-6-13(20)15(21-14(9)5-8)7-1-2-10(17)12(19)3-7/h1-5,13,15-20H,6H2/t13-,15+/m1/s1	Oc1cc2O[C@@H](c3ccc(c(c3)O)O)[C@@H](Cc2c(c1)O)O	P02768	1
Malvidin	Others	2-(4-hydroxy-3,5-dimethoxyphenyl)chromenylium-3,5,7-triol	C17H14O7	KZMACGJDUUWFCH-UHFFFAOYSA-O	InChI=1S/C17H14O7/c1-22-14-3-8(4-15(23-2)16(14)21)17-12(20)7-10-11(19)5-9(18)6-13(10)24-17/h3-7H,1-2H3,(H3-,18,19,20,21)/p+1	COc1cc(cc(c1O)OC)c1[o+]c2cc(O)cc(c2cc1O)O	P28907	1
(+)-Epicatechin	Flavan-3-ols	(2S,3S)-2-(3,4-dihydroxyphenyl)-3,4-dihydro-2H-chromene-3,5,7-triol	C15H14O6	PFTAWBLQPZVEMU-ZFWWWQNUSA-N	InChI=1S/C15H14O6/c16-8-4-11(18)9-6-13(20)15(21-14(9)5-8)7-1-2-10(17)12(19)3-7/h1-5,13,15-20H,6H2/t13-,15-/m0/s1	Oc1cc2O[C@@H](c3ccc(c(c3)O)O)[C@H](Cc2c(c1)O)O	P56817,P49327	2
Quercetin-3-Beta-Robinobioside	Flavonols	2-(3,4-dihydroxyphenyl)-5,7-dihydroxy-3-[(2S,3R,4S,5R,6R)-3,4,5-trihydroxy-6-[[(2R,3R,4R,5R,6S)-3,4,5-trihydroxy-6-methyloxan-2-yl]oxymethyl]oxan-2-yl]oxychromen-4-one	C27H30O16	IKGXIBQEEMLURG-IEBISRBZSA-N	InChI=1S/C27H30O16/c1-8-17(32)20(35)22(37)26(40-8)39-7-15-18(33)21(36)23(38)27(42-15)43-25-19(34)16-13(31)5-10(28)6-14(16)41-24(25)9-2-3-11(29)12(30)4-9/h2-6,8,15,17-18,20-23,26-33,35-38H,7H2,1H3/t8-,15+,17-,18-,20+,21-,22+,23+,26+,27-/m0/s1	Oc1cc(O)c2c(c1)oc(c(c2=O)O[C@@H]1O[C@H](CO[C@@H]2O[C@@H](C)[C@@H]([C@H]([C@H]2O)O)O)[C@@H]([C@@H]([C@H]1O)O)O)c1ccc(c(c1)O)O	Q14469	1
Ternatin	Flavonols	5-hydroxy-2-(4-hydroxy-3-methoxyphenyl)-3,7,8-trimethoxychromen-4-one	C19H18O8	DGUWNYKZOJRCQQ-UHFFFAOYSA-N	InChI=1S/C19H18O8/c1-23-12-7-9(5-6-10(12)20)16-19(26-4)15(22)14-11(21)8-13(24-2)17(25-3)18(14)27-16/h5-8,20-21H,1-4H3	COc1cc(ccc1O)c1oc2c(OC)c(OC)cc(c2c(=O)c1OC)O	Q9BUF5	1
(6Ar,11Ar)-1-Methoxy-10-(3-Methylbut-2-Enyl)-6A,11A-Dihydro-6H-[1]Benzofuro[3,2-C]Chromene-3,9-Diol	Others	(6aR,11aR)-1-methoxy-10-(3-methylbut-2-enyl)-6a,11a-dihydro-6H-[1]benzofuro[3,2-c]chromene-3,9-diol	C21H22O5	YKTZRMXYANFKQR-YCRPNKLZSA-N	InChI=1S/C21H22O5/c1-11(2)4-5-14-16(23)7-6-13-15-10-25-18-9-12(22)8-17(24-3)19(18)21(15)26-20(13)14/h4,6-9,15,21-23H,5,10H2,1-3H3/t15-,21+/m0/s1	COc1cc(O)cc2c1[C@@H]1Oc3c([C@@H]1CO2)ccc(c3CC=C(C)C)O	P43220,O94782,Q9Y253,O75164,P84022,Q99700	6
Quercetin-3-Ogalactopyranoside	Flavonols	2-(3,4-dihydroxyphenyl)-5,7-dihydroxy-3-[(3R,4S,5R,6R)-3,4,5-trihydroxy-6-(hydroxymethyl)oxan-2-yl]oxychromen-4-one	C21H20O12	OVSQVDMCBVZWGM-HBDJNLTOSA-N	InChI=1S/C21H20O12/c22-6-13-15(27)17(29)18(30)21(32-13)33-20-16(28)14-11(26)4-8(23)5-12(14)31-19(20)7-1-2-9(24)10(25)3-7/h1-5,13,15,17-18,21-27,29-30H,6H2/t13-,15+,17+,18-,21?/m1/s1	OC[C@H]1OC(Oc2c(oc3c(c2=O)c(O)cc(c3)O)c2ccc(c(c2)O)O)[C@@H]([C@H]([C@H]1O)O)O	P36888	1
Homoeriodictyol	Flavanones	(2S)-5,7-dihydroxy-2-(4-hydroxy-3-methoxyphenyl)-2,3-dihydrochromen-4-one	C16H14O6	FTODBIPDTXRIGS-ZDUSSCGKSA-N	InChI=1S/C16H14O6/c1-21-14-4-8(2-3-10(14)18)13-7-12(20)16-11(19)5-9(17)6-15(16)22-13/h2-6,13,17-19H,7H2,1H3/t13-/m0/s1	COc1cc(ccc1O)[C@@H]1CC(=O)c2c(O1)cc(cc2O)O	P05177,P04798,Q16678	3
5,7-Dihydroxy-2-Phenyl-2,3-Dihydrochromen-4-One	Flavanones	5,7-dihydroxy-2-phenyl-2,3-dihydrochromen-4-one	C15H12O4	URFCJEUYXNAHFI-UHFFFAOYSA-N	InChI=1S/C15H12O4/c16-10-6-11(17)15-12(18)8-13(19-14(15)7-10)9-4-2-1-3-5-9/h1-7,13,16-17H,8H2	Oc1cc2OC(CC(=O)c2c(c1)O)c1ccccc1	P27695,Q13526,Q96QE3	3
Kaempferol-3-Beta-D-(6-O-Cis-P-Coumaroyl)Glucopyranoside	Flavonols	[(2R,3S,4S,5R,6S)-6-[5,7-dihydroxy-2-(4-hydroxyphenyl)-4-oxochromen-3-yl]oxy-3,4,5-trihydroxyoxan-2-yl]methyl (Z)-3-(4-hydroxyphenyl)prop-2-enoate	C30H26O13	DVGGLGXQSFURLP-PYFXTMFGSA-N	InChI=1S/C30H26O13/c31-16-6-1-14(2-7-16)3-10-22(35)40-13-21-24(36)26(38)27(39)30(42-21)43-29-25(37)23-19(34)11-18(33)12-20(23)41-28(29)15-4-8-17(32)9-5-15/h1-12,21,24,26-27,30-34,36,38-39H,13H2/b10-3-/t21-,24-,26+,27-,30+/m1/s1	O=C(OC[C@H]1O[C@@H](Oc2c(oc3c(c2=O)c(O)cc(c3)O)c2ccc(cc2)O)[C@@H]([C@H]([C@@H]1O)O)O)/C=Cc1ccc(cc1)O	P08684	1
Norartocarpetin	Flavones	2-(2,4-dihydroxyphenyl)-5,7-dihydroxychromen-4-one	C15H10O6	ZSYPIPFQOQGYHH-UHFFFAOYSA-N	InChI=1S/C15H10O6/c16-7-1-2-9(10(18)3-7)13-6-12(20)15-11(19)4-8(17)5-14(15)21-13/h1-6,16-19H	Oc1ccc(c(c1)O)c1cc(=O)c2c(o1)cc(cc2O)O	P35354,P23219,P56817	3
b"4,3-Di-O-Methylapocynin-B"	Flavan-3-ols	(2R,3S,10R)-2-(3,5-dihydroxy-4-methoxyphenyl)-3,5-dihydroxy-10-(4-hydroxy-3-methoxyphenyl)-3,4,9,10-tetrahydro-2H-pyrano[2,3-f]chromen-8-one	C26H24O10	GWDMTADRTCKKKV-ZXWJAXLNSA-N	InChI=1S/C26H24O10/c1-33-20-7-11(3-4-15(20)27)13-9-22(32)35-21-10-16(28)14-8-19(31)24(36-25(14)23(13)21)12-5-17(29)26(34-2)18(30)6-12/h3-7,10,13,19,24,27-31H,8-9H2,1-2H3/t13-,19+,24-/m1/s1	COc1c(O)cc(cc1O)[C@H]1Oc2c(C[C@@H]1O)c(O)cc1c2[C@H](CC(=O)O1)c1ccc(c(c1)OC)O	Q16539	1
Sid85272548	Isoflavones	[6-methoxy-3-(4-methoxyphenyl)-4-oxochromen-7-yl] acetate	C19H16O6	OLSFYFUZJCERJF-UHFFFAOYSA-N	InChI=1S/C19H16O6/c1-11(20)25-18-9-16-14(8-17(18)23-3)19(21)15(10-24-16)12-4-6-13(22-2)7-5-12/h4-10H,1-3H3	COc1cc2c(cc1OC(=O)C)occ(c2=O)c1ccc(cc1)OC	P83916,O75874,Q8WZA2,O75496,Q03431,P17405,Q13148,Q96QE3,P38398	9
Kaempferol 3-O-Beta-D-Galactopyranosyl-7-O-Alpha-L-Rhamnopyranoside	Flavonols	5-hydroxy-2-(4-hydroxyphenyl)-3-[(2S,3R,4S,5R,6R)-3,4,5-trihydroxy-6-(hydroxymethyl)oxan-2-yl]oxy-7-[(2S,3R,4R,5R,6S)-3,4,5-trihydroxy-6-methyloxan-2-yl]oxychromen-4-one	C27H30O15	JYXSWDCPHRTYGU-VYARGGPUSA-N	InChI=1S/C27H30O15/c1-9-17(31)20(34)22(36)26(38-9)39-12-6-13(30)16-14(7-12)40-24(10-2-4-11(29)5-3-10)25(19(16)33)42-27-23(37)21(35)18(32)15(8-28)41-27/h2-7,9,15,17-18,20-23,26-32,34-37H,8H2,1H3/t9-,15+,17-,18-,20+,21-,22+,23+,26-,27-/m0/s1	OC[C@H]1O[C@@H](Oc2c(oc3c(c2=O)c(O)cc(c3)O[C@@H]2O[C@@H](C)[C@@H]([C@H]([C@H]2O)O)O)c2ccc(cc2)O)[C@@H]([C@H]([C@H]1O)O)O	P11387	1
3,5-Dihydroxy-2-Phenylchromen-4-One	Flavonols	3,5-dihydroxy-2-phenylchromen-4-one	C15H10O4	QHYWQIVTVQAKQF-UHFFFAOYSA-N	InChI=1S/C15H10O4/c16-10-7-4-8-11-12(10)13(17)14(18)15(19-11)9-5-2-1-3-6-9/h1-8,16,18H	Oc1cccc2c1c(=O)c(c(o2)c1ccccc1)O	P02545,O75604,P10636,P16050,P18054,P04637,Q99714,B2RXH2	8
Mundulone	Isoflavones	3-hydroxy-7-(5-methoxy-2,2-dimethylchromen-6-yl)-2,2-dimethyl-3,4-dihydropyrano[3,2-g]chromen-6-one	C26H26O6	KJTDZAHLWHEULN-UHFFFAOYSA-N	InChI=1S/C26H26O6/c1-25(2)9-8-16-19(31-25)7-6-15(24(16)29-5)18-13-30-21-12-20-14(10-17(21)23(18)28)11-22(27)26(3,4)32-20/h6-10,12-13,22,27H,11H2,1-5H3	COc1c2C=CC(Oc2ccc1c1coc2c(c1=O)cc1c(c2)OC(C(C1)O)(C)C)(C)C	P00352,P04062,O94782,P15428,P08684,P11021,Q9NPD5,P04637,Q9Y6L6,Q16637,O15296	11
Erythribyssin A	Others	(6aS,11aS)-6a,9-dimethoxy-10-(3-methylbut-2-enyl)-6,11a-dihydro-[1]benzofuro[3,2-c]chromen-3-ol	C22H24O5	IGSYALWDCAHJEF-FCHUYYIVSA-N	InChI=1S/C22H24O5/c1-13(2)5-7-15-18(24-3)10-9-17-20(15)27-21-16-8-6-14(23)11-19(16)26-12-22(17,21)25-4/h5-6,8-11,21,23H,7,12H2,1-4H3/t21-,22+/m0/s1	CO[C@]12COc3c([C@@H]2Oc2c1ccc(c2CC=C(C)C)OC)ccc(c3)O	P18031	1
Isovitexin	Flavones	5,7-dihydroxy-2-(4-hydroxyphenyl)-6-[(2S,3R,4R,5S,6R)-3,4,5-trihydroxy-6-(hydroxymethyl)oxan-2-yl]chromen-4-one	C21H20O10	MYXNWGACZJSMBT-VJXVFPJBSA-N	InChI=1S/C21H20O10/c22-7-14-17(26)19(28)20(29)21(31-14)16-11(25)6-13-15(18(16)27)10(24)5-12(30-13)8-1-3-9(23)4-2-8/h1-6,14,17,19-23,25-29H,7H2/t14-,17-,19+,20-,21+/m1/s1	OC[C@H]1O[C@H]([C@@H]([C@H]([C@@H]1O)O)O)c1c(O)cc2c(c1O)c(=O)cc(o2)c1ccc(cc1)O	Q9NUW8,P63092,P10253,O75874	4
Scutellarein	Flavones	5,6,7-trihydroxy-2-(4-hydroxyphenyl)chromen-4-one	C15H10O6	JVXZRQGOGOXCEC-UHFFFAOYSA-N	InChI=1S/C15H10O6/c16-8-3-1-7(2-4-8)11-5-9(17)13-12(21-11)6-10(18)14(19)15(13)20/h1-6,16,18-20H	Oc1ccc(cc1)c1cc(=O)c2c(o1)cc(c(c2O)O)O	Q13332,P51649,P36888,P29350,P04798,P22309,Q9Y3R4,Q16445,P04745,O75874,P18031,Q16678,P18433,P43250	14
3-(4-Hydroxyphenyl)-6-Methoxy-7-[3,4,5-Trihydroxy-6-(Hydroxymethyl)Oxan-2-Yl]Oxychromen-4-One	Isoflavones	3-(4-hydroxyphenyl)-6-methoxy-7-[3,4,5-trihydroxy-6-(hydroxymethyl)oxan-2-yl]oxychromen-4-one	C22H22O10	OZBAVEKZGSOMOJ-UHFFFAOYSA-N	InChI=1S/C22H22O10/c1-29-15-6-12-14(30-9-13(18(12)25)10-2-4-11(24)5-3-10)7-16(15)31-22-21(28)20(27)19(26)17(8-23)32-22/h2-7,9,17,19-24,26-28H,8H2,1H3	OCC1OC(Oc2cc3occ(c(=O)c3cc2OC)c2ccc(cc2)O)C(C(C1O)O)O	P00352,Q16637,Q96QE3	3
Proanthocyanidin A1	Flavan-3-ols	</td></tr>\r\n\t\t\t\t<tr><td align=right><b>Synonyms: &nbsp</b>	C30H24O12	NSEWTSAADLNHNH-TXZJYACMSA-N	InChI=1S/C30H24O12/c31-13-7-20(37)24-22(8-13)41-30(12-2-4-16(33)19(36)6-12)29(39)26(24)25-23(42-30)10-17(34)14-9-21(38)27(40-28(14)25)11-1-3-15(32)18(35)5-11/h1-8,10,21,26-27,29,31-39H,9H2/t21-,26+,27+,29+,30-/m0/s1	Oc1cc(O)c2c(c1)O[C@@]1([C@@H]([C@H]2c2c(O1)cc(c1c2O[C@@H]([C@H](C1)O)c1ccc(c(c1)O)O)O)O)c1ccc(c(c1)O)O	P15692,P49763	2
2-(3,4-Dihydroxyphenyl)-5-Hydroxy-7-[(2S,3R,4S,5S,6R)-3,4,5-Trihydroxy-6-[[(2R,3R,4R,5R,6S)-3,4,5-Trihydroxy-6-Methyloxan-2-Yl]Oxymethyl]Oxan-2-Yl]Oxychromen-4-One	Flavones	2-(3,4-dihydroxyphenyl)-5-hydroxy-7-[(2S,3R,4S,5S,6R)-3,4,5-trihydroxy-6-[[(2R,3R,4R,5R,6S)-3,4,5-trihydroxy-6-methyloxan-2-yl]oxymethyl]oxan-2-yl]oxychromen-4-one	C27H30O15	MGYBYJXAXUBTQF-FOBVWLSUSA-N	InChI=1S/C27H30O15/c1-9-20(32)22(34)24(36)26(39-9)38-8-18-21(33)23(35)25(37)27(42-18)40-11-5-14(30)19-15(31)7-16(41-17(19)6-11)10-2-3-12(28)13(29)4-10/h2-7,9,18,20-30,32-37H,8H2,1H3/t9-,18+,20-,21+,22+,23-,24+,25+,26+,27+/m0/s1	O[C@H]1[C@@H](O[C@@H]([C@H]([C@@H]1O)O)CO[C@@H]1O[C@@H](C)[C@@H]([C@H]([C@H]1O)O)O)Oc1cc(O)c2c(c1)oc(cc2=O)c1ccc(c(c1)O)O	O94925,O75164,Q9P0U3,Q9H3R0,Q13526,O75496,Q9H0H5	7
Tangeretin	Flavones	5,6,7,8-tetramethoxy-2-(4-methoxyphenyl)chromen-4-one	C20H20O7	ULSUXBXHSYSGDT-UHFFFAOYSA-N	InChI=1S/C20H20O7/c1-22-12-8-6-11(7-9-12)14-10-13(21)15-16(23-2)18(24-3)20(26-5)19(25-4)17(15)27-14/h6-10H,1-5H3	COc1ccc(cc1)c1cc(=O)c2c(o1)c(OC)c(c(c2OC)OC)OC	O94782,Q8WZA2,Q9Y6L6,P83916,Q9UNQ0,P00352,O94956,P08183,Q13148,P10828,Q03164,P08684	12
Kuhlmannin	Others	6-hydroxy-7,8-dimethoxy-4-phenylchromen-2-one	C17H14O5	ABUBCBFUQXIEAU-UHFFFAOYSA-N	InChI=1S/C17H14O5/c1-20-16-13(18)8-12-11(10-6-4-3-5-7-10)9-14(19)22-15(12)17(16)21-2/h3-9,18H,1-2H3	COc1c(OC)c(O)cc2c1oc(=O)cc2c1ccccc1	P00352,P08684,Q9NPD5,Q9Y6L6	4
Cinnamtannin B1	Flavan-3-ols	</td></tr>\r\n\t\t\t\t<tr><td align=right><b>Synonyms: &nbsp</b>	C45H36O18	BYSRPHRKESMCPO-LQNPQWRQSA-N	InChI=1S/C45H36O18/c46-18-10-27(54)33-31(11-18)62-45(17-3-6-22(49)26(53)9-17)44(59)38(33)36-32(63-45)14-29(56)35-37(39(58)41(61-43(35)36)16-2-5-21(48)25(52)8-16)34-28(55)13-23(50)19-12-30(57)40(60-42(19)34)15-1-4-20(47)24(51)7-15/h1-11,13-14,30,37-41,44,46-59H,12H2/t30-,37+,38-,39-,40-,41-,44-,45+/m1/s1	Oc1cc(O)c2c(c1)O[C@@]1([C@@H]([C@H]2c2c(O1)cc(c1c2O[C@H](c2ccc(c(c2)O)O)[C@@H]([C@H]1c1c(O)cc(c2c1O[C@@H]([C@@H](C2)O)c1ccc(c(c1)O)O)O)O)O)O)c1ccc(c(c1)O)O	Q06187,P35354	2
Hispidulin	Flavones	5,7-dihydroxy-2-(4-hydroxyphenyl)-6-methoxychromen-4-one	C16H12O6	IHFBPDAQLQOCBX-UHFFFAOYSA-N	InChI=1S/C16H12O6/c1-21-16-11(19)7-13-14(15(16)20)10(18)6-12(22-13)8-2-4-9(17)5-3-8/h2-7,17,19-20H,1H3	COc1c(O)cc2c(c1O)c(=O)cc(o2)c1ccc(cc1)O	P06746,P51151,P55789,Q13315,P10636,Q03431,Q16445,Q03164,P51843,Q9NUW8,P11166,O15118,P11309,O94782,P04637,Q96QE3,Q9UBT6	17
b"(2S)-6-(Gamma,Gamma-Dimethylallyl)-5,4-Dihydroxy-3-Methoxy-6,6-Dimethylpyran[2,3:7,8]Flavanone"	Flavanones	(2S)-5-hydroxy-2-(4-hydroxy-3-methoxyphenyl)-8,8-dimethyl-6-(3-methylbut-2-enyl)-2,3-dihydropyrano[2,3-h]chromen-4-one	C26H28O6	KCZWDIXZSAGPCD-FQEVSTJZSA-N	InChI=1S/C26H28O6/c1-14(2)6-8-16-23(29)22-19(28)13-20(15-7-9-18(27)21(12-15)30-5)31-25(22)17-10-11-26(3,4)32-24(16)17/h6-7,9-12,20,27,29H,8,13H2,1-5H3/t20-/m0/s1	COc1cc(ccc1O)[C@@H]1CC(=O)c2c(O1)c1C=CC(Oc1c(c2O)CC=C(C)C)(C)C	P11926	1
Maackiain	Others	</td></tr>\r\n\t\t\t\t<tr><td align=right><b>Synonyms: &nbsp</b>	C16H12O5	HUKSJTUUSUGIDC-ZBEGNZNMSA-N	InChI=1S/C16H12O5/c17-8-1-2-9-12(3-8)18-6-11-10-4-14-15(20-7-19-14)5-13(10)21-16(9)11/h1-5,11,16-17H,6-7H2/t11-,16-/m0/s1	Oc1ccc2c(c1)OC[C@@H]1[C@H]2Oc2c1cc1c(c2)OCO1	Q9NPD5,Q9Y6L6,P13866,P31639	4
2-[3,4-Dihydroxy-5-(3-Methylbut-2-Enyl)Phenyl]-3,5,7-Trihydroxy-8-(2-Methylbut-3-En-2-Yl)Chromen-4-One	Flavonols	2-[3,4-dihydroxy-5-(3-methylbut-2-enyl)phenyl]-3,5,7-trihydroxy-8-(2-methylbut-3-en-2-yl)chromen-4-one	C25H26O7	XCKYBRFHABGHMT-UHFFFAOYSA-N	InChI=1S/C25H26O7/c1-6-25(4,5)19-16(27)11-15(26)18-21(30)22(31)23(32-24(18)19)14-9-13(8-7-12(2)3)20(29)17(28)10-14/h6-7,9-11,26-29,31H,1,8H2,2-5H3	C=CC(c1c(O)cc(c2c1oc(c1cc(O)c(c(c1)CC=C(C)C)O)c(c2=O)O)O)(C)C	P18031	1
Galangin	Flavonols	3,5,7-trihydroxy-2-phenylchromen-4-one	C15H10O5	VCCRNZQBSJXYJD-UHFFFAOYSA-N	InChI=1S/C15H10O5/c16-9-6-10(17)12-11(7-9)20-15(14(19)13(12)18)8-4-2-1-3-5-8/h1-7,16-17,19H	Oc1cc(O)c2c(c1)oc(c(c2=O)O)c1ccccc1	P35503,P43166,P06276,P47989,P33261,P0DMS8,P38398,P22303,P22309,P04798,P54855,P29274,P05067,O75496,P10635,P08183,P22748,Q96QE3,O43570,P11712,O94925,O60656,O75874,Q03164,P10636,P08684,P05177,Q16678,Q9UNA4	29
b"5-Hydroxy-6,7,3,4-Tetramethoxyflavone"	Flavones	2-(3,4-dimethoxyphenyl)-5-hydroxy-6,7-dimethoxychromen-4-one	C19H18O7	QEWSAPKRFOFQIU-UHFFFAOYSA-N	InChI=1S/C19H18O7/c1-22-12-6-5-10(7-14(12)23-2)13-8-11(20)17-15(26-13)9-16(24-3)19(25-4)18(17)21/h5-9,21H,1-4H3	COc1ccc(cc1OC)c1cc(=O)c2c(o1)cc(c(c2O)OC)OC	P41145,P34972,P41143,P35372,P21554	5
Glabrone	Isoflavones	7-hydroxy-3-(5-hydroxy-2,2-dimethylchromen-6-yl)chromen-4-one	C20H16O5	COLMVFWKLOZOOP-UHFFFAOYSA-N	InChI=1S/C20H16O5/c1-20(2)8-7-14-16(25-20)6-5-12(18(14)22)15-10-24-17-9-11(21)3-4-13(17)19(15)23/h3-10,21-22H,1-2H3	Oc1ccc2c(c1)occ(c2=O)c1ccc2c(c1O)C=CC(O2)(C)C	P18031	1
3-(Gamma,Gamma-Dimethylpropenyl)Moracinm	Others	5-[6-hydroxy-7-(3-methylbut-2-enyl)-1-benzofuran-2-yl]benzene-1,3-diol	C19H18O4	PMSZSXKBGUQXFG-UHFFFAOYSA-N	InChI=1S/C19H18O4/c1-11(2)3-5-16-17(22)6-4-12-9-18(23-19(12)16)13-7-14(20)10-15(21)8-13/h3-4,6-10,20-22H,5H2,1-2H3	CC(=CCc1c(O)ccc2c1oc(c2)c1cc(O)cc(c1)O)C	P35354,P23219	2
Ouratea-Catechin	Flavan-3-ols	(2R,3R)-2-(3,5-dihydroxy-4-methoxyphenyl)-3,4-dihydro-2H-chromene-3,5,7-triol	C16H16O7	ITDYPNOEEHONAH-UKRRQHHQSA-N	InChI=1S/C16H16O7/c1-22-16-11(19)2-7(3-12(16)20)15-13(21)6-9-10(18)4-8(17)5-14(9)23-15/h2-5,13,15,17-21H,6H2,1H3/t13-,15-/m1/s1	COc1c(O)cc(cc1O)[C@H]1Oc2cc(O)cc(c2C[C@H]1O)O	Q16539,P35354,P23219	3
Procyanidin C1	Flavan-3-ols	(2R,3R,4S)-2-(3,4-dihydroxyphenyl)-4-[(2R,3R)-2-(3,4-dihydroxyphenyl)-3,5,7-trihydroxy-3,4-dihydro-2H-chromen-8-yl]-8-[(2R,3R,4R)-2-(3,4-dihydroxyphenyl)-3,5,7-trihydroxy-3,4-dihydro-2H-chromen-4-yl]-3,4-dihydro-2H-chromene-3,5,7-triol	C45H38O18	MOJZMWJRUKIQGL-XILRTYJMSA-N	InChI=1S/C45H38O18/c46-18-10-27(54)33-32(11-18)61-42(16-2-5-21(48)25(52)8-16)39(59)37(33)35-29(56)14-30(57)36-38(40(60)43(63-45(35)36)17-3-6-22(49)26(53)9-17)34-28(55)13-23(50)19-12-31(58)41(62-44(19)34)15-1-4-20(47)24(51)7-15/h1-11,13-14,31,37-43,46-60H,12H2/t31-,37-,38+,39-,40-,41-,42-,43-/m1/s1	Oc1cc(O)c2c(c1)O[C@@H]([C@@H]([C@H]2c1c(O)cc(c2c1O[C@H](c1ccc(c(c1)O)O)[C@@H]([C@H]2c1c(O)cc(c2c1O[C@@H]([C@@H](C2)O)c1ccc(c(c1)O)O)O)O)O)O)c1ccc(c(c1)O)O	P14780,P08253,Q04759	3
Abyssinoflavone V	Flavanones	(2S)-2-(2,2-dimethylchromen-6-yl)-5,7-dihydroxy-2,3-dihydrochromen-4-one	C20H18O5	WQCFPYAJTXOZMT-KRWDZBQOSA-N	InChI=1S/C20H18O5/c1-20(2)6-5-12-7-11(3-4-16(12)25-20)17-10-15(23)19-14(22)8-13(21)9-18(19)24-17/h3-9,17,21-22H,10H2,1-2H3/t17-/m0/s1	Oc1cc2O[C@@H](CC(=O)c2c(c1)O)c1ccc2c(c1)C=CC(O2)(C)C	P18031	1
Licarin A	Others	2-methoxy-4-[(2S,3S)-7-methoxy-3-methyl-5-[(E)-prop-1-enyl]-2,3-dihydro-1-benzofuran-2-yl]phenol	C20H22O4	ITDOFWOJEDZPCF-FNINDUDTSA-N	InChI=1S/C20H22O4/c1-5-6-13-9-15-12(2)19(24-20(15)18(10-13)23-4)14-7-8-16(21)17(11-14)22-3/h5-12,19,21H,1-4H3/b6-5+/t12-,19-/m0/s1	C/C=C/c1cc2c(c(c1)OC)O[C@@H]([C@H]2C)c1ccc(c(c1)OC)O	P43220,P39748,O75164,Q8WZA2,O75496,P84022	6
b"Astragalin 2,3-O-Digallate"	Flavonols	[(2S,3R,4S,5R,6R)-2-[5,7-dihydroxy-2-(4-hydroxyphenyl)-4-oxochromen-3-yl]oxy-5-hydroxy-6-(hydroxymethyl)-3-(3,4,5-trihydroxybenzoyl)oxyoxan-4-yl] 3,4,5-trihydroxybenzoate	C35H28O19	XIJNRDKMQMEBGV-FGQFUJKUSA-N	InChI=1S/C35H28O19/c36-11-23-27(46)30(52-33(48)13-5-18(40)25(44)19(41)6-13)32(53-34(49)14-7-20(42)26(45)21(43)8-14)35(51-23)54-31-28(47)24-17(39)9-16(38)10-22(24)50-29(31)12-1-3-15(37)4-2-12/h1-10,23,27,30,32,35-46H,11H2/t23-,27-,30+,32-,35+/m1/s1	OC[C@H]1O[C@@H](Oc2c(oc3c(c2=O)c(O)cc(c3)O)c2ccc(cc2)O)[C@@H]([C@H]([C@@H]1O)OC(=O)c1cc(O)c(c(c1)O)O)OC(=O)c1cc(O)c(c(c1)O)O	P34913	1
b"3,5,7-Trihydroxy-3,4,5-Trimethoxyflavone"	Flavonols	3,5,7-trihydroxy-2-(3,4,5-trimethoxyphenyl)chromen-4-one	C18H16O8	LHNLHJJGLDWGFS-UHFFFAOYSA-N	InChI=1S/C18H16O8/c1-23-12-4-8(5-13(24-2)18(12)25-3)17-16(22)15(21)14-10(20)6-9(19)7-11(14)26-17/h4-7,19-20,22H,1-3H3	COc1c(OC)cc(cc1OC)c1oc2cc(O)cc(c2c(=O)c1O)O	P08183	1
Kazinol U	Others	4-[(2R)-7-hydroxy-3,4-dihydro-2H-chromen-2-yl]-3-(3-methylbut-2-enyl)benzene-1,2-diol	C20H22O4	MVHAAGZZSATGDD-GOSISDBHSA-N	InChI=1S/C20H22O4/c1-12(2)3-7-16-15(8-9-17(22)20(16)23)18-10-5-13-4-6-14(21)11-19(13)24-18/h3-4,6,8-9,11,18,21-23H,5,7,10H2,1-2H3/t18-/m1/s1	CC(=CCc1c(ccc(c1O)O)[C@H]1CCc2c(O1)cc(cc2)O)C	Q92731,P03372	2
Egonol Oleate	Others	3-[2-(1,3-benzodioxol-5-yl)-7-methoxy-1-benzofuran-5-yl]propyl (Z)-octadec-9-enoate	C37H50O6	GVZWPCDBHBSBHJ-KHPPLWFESA-N	InChI=1S/C37H50O6/c1-3-4-5-6-7-8-9-10-11-12-13-14-15-16-17-20-36(38)40-23-18-19-29-24-31-27-33(43-37(31)35(25-29)39-2)30-21-22-32-34(26-30)42-28-41-32/h10-11,21-22,24-27H,3-9,12-20,23,28H2,1-2H3/b11-10-	CCCCCCCC/C=CCCCCCCCC(=O)OCCCc1cc(OC)c2c(c1)cc(o2)c1ccc2c(c1)OCO2	P22303	1
9-Hydroxy-7-(4-Hydroxyphenyl)-[1,3]Dioxolo[4,5-G]Chromen-8-One	Isoflavones	9-hydroxy-7-(4-hydroxyphenyl)-[1,3]dioxolo[4,5-g]chromen-8-one	C16H10O6	NUGRQNBDTZWXTP-UHFFFAOYSA-N	InChI=1S/C16H10O6/c17-9-3-1-8(2-4-9)10-6-20-11-5-12-16(22-7-21-12)15(19)13(11)14(10)18/h1-6,17,19H,7H2	Oc1ccc(cc1)c1coc2c(c1=O)c(O)c1c(c2)OCO1	O60656,Q9HAW8,Q9HAW9,Q9HAW7,P22309	5
Sid26657808	Others	(2Z)-6-hydroxy-2-[(4-hydroxy-3-methoxyphenyl)methylidene]-1-benzofuran-3-one	C16H12O5	HPSPCMSCDNHZJM-CHHVJCJISA-N	InChI=1S/C16H12O5/c1-20-14-6-9(2-5-12(14)18)7-15-16(19)11-4-3-10(17)8-13(11)21-15/h2-8,17-18H,1H3/b15-7-	COc1cc(ccc1O)/C=C/1Oc2c(C1=O)ccc(c2)O	Q92830,P06746,Q8IUX4,P51151,P83916,P43220,O15118,P04637,Q03431,Q99816,O75496,P63092,Q9UNA4,Q9H0H5,Q9NR56,Q99700,Q96QE3,Q03164,Q14191,P10636,Q03164,B2RXH2	22
Sideroxylonal A	Others	(2R,3R,4S)-2-(3,5-diformyl-2,4,6-trihydroxyphenyl)-5,7-dihydroxy-4-(2-methylpropyl)-3-propan-2-yl-3,4-dihydro-2H-chromene-6,8-dicarbaldehyde	C26H28O10	PHQDMQGEKNBIPF-FLFOAQQMSA-N	InChI=1S/C26H28O10/c1-10(2)5-12-17(11(3)4)26(19-23(34)13(6-27)20(31)14(7-28)24(19)35)36-25-16(9-30)21(32)15(8-29)22(33)18(12)25/h6-12,17,26,31-35H,5H2,1-4H3/t12-,17+,26+/m0/s1	O=Cc1c2O[C@H]([C@@H]([C@@H](c2c(c(c1O)C=O)O)CC(C)C)C(C)C)c1c(O)c(C=O)c(c(c1O)C=O)O	P05121	1
Addisofuran A	Others	2-[4-hydroxy-2-methoxy-5-(3-methylbut-2-enyl)phenyl]-1-benzofuran-6-ol	C20H20O4	XQVKBMIVACNFLX-UHFFFAOYSA-N	InChI=1S/C20H20O4/c1-12(2)4-5-13-8-16(19(23-3)11-17(13)22)20-9-14-6-7-15(21)10-18(14)24-20/h4,6-11,21-22H,5H2,1-3H3	COc1cc(O)c(cc1c1cc2c(o1)cc(cc2)O)CC=C(C)C	P18031	1
Cirsiliol	Flavones	2-(3,4-dihydroxyphenyl)-5-hydroxy-6,7-dimethoxychromen-4-one	C17H14O7	IMEYGBIXGJLUIS-UHFFFAOYSA-N	InChI=1S/C17H14O7/c1-22-14-7-13-15(16(21)17(14)23-2)11(20)6-12(24-13)8-3-4-9(18)10(19)5-8/h3-7,18-19,21H,1-2H3	COc1cc2oc(cc(=O)c2c(c1OC)O)c1ccc(c(c1)O)O	P04798	1
Isoorientin	Flavones	2-(3,4-dihydroxyphenyl)-5,7-dihydroxy-6-[(2S,3R,4R,5S,6R)-3,4,5-trihydroxy-6-(hydroxymethyl)oxan-2-yl]chromen-4-one	C21H20O11	ODBRNZZJSYPIDI-VJXVFPJBSA-N	InChI=1S/C21H20O11/c22-6-14-17(27)19(29)20(30)21(32-14)16-11(26)5-13-15(18(16)28)10(25)4-12(31-13)7-1-2-8(23)9(24)3-7/h1-5,14,17,19-24,26-30H,6H2/t14-,17-,19+,20-,21+/m1/s1	OC[C@H]1O[C@H]([C@@H]([C@H]([C@@H]1O)O)O)c1c(O)cc2c(c1O)c(=O)cc(o2)c1ccc(c(c1)O)O	P27695,P15121,Q9NUW8,O75164,Q9Y468,Q9UNA4,Q9H0H5,Q9Y253,Q96QE3,Q13951	10
2-(3,4-Dihydroxyphenyl)-5,7-Dihydroxy-3-[3,4,5-Trihydroxy-6-(Hydroxymethyl)Oxan-2-Yl]Oxychromen-4-One	Flavonols	2-(3,4-dihydroxyphenyl)-5,7-dihydroxy-3-[3,4,5-trihydroxy-6-(hydroxymethyl)oxan-2-yl]oxychromen-4-one	C21H20O12	OVSQVDMCBVZWGM-UHFFFAOYSA-N	InChI=1S/C21H20O12/c22-6-13-15(27)17(29)18(30)21(32-13)33-20-16(28)14-11(26)4-8(23)5-12(14)31-19(20)7-1-2-9(24)10(25)3-7/h1-5,13,15,17-18,21-27,29-30H,6H2	OCC1OC(Oc2c(oc3c(c2=O)c(O)cc(c3)O)c2ccc(c(c2)O)O)C(C(C1O)O)O	P27695,O94925,Q13951,O94782,Q9UBT6,B2RXH2,P34949,Q16637,O75496,P07237,Q9UNA4,P10253,Q9Y253	13
Psi-Tectorigenin	Isoflavones	5,7-dihydroxy-3-(4-hydroxyphenyl)-8-methoxychromen-4-one	C16H12O6	UYLQOGTYNFVQQX-UHFFFAOYSA-N	InChI=1S/C16H12O6/c1-21-15-12(19)6-11(18)13-14(20)10(7-22-16(13)15)8-2-4-9(17)5-3-8/h2-7,17-19H,1H3	COc1c(O)cc(c2c1occ(c2=O)c1ccc(cc1)O)O	P00533	1
5-Hydroxyflavone	Flavones	5-hydroxy-2-phenylchromen-4-one	C15H10O3	IYBLVRRCNVHZQJ-UHFFFAOYSA-N	InChI=1S/C15H10O3/c16-11-7-4-8-13-15(11)12(17)9-14(18-13)10-5-2-1-3-6-10/h1-9,16H	Oc1cccc2c1c(=O)cc(o2)c1ccccc1	P04062,Q16637,P10275,P16050,P04798,P00352,O75496,P11388,P49798,P10636,P08684,P05177,Q16236,Q9UNA4	14
Ononin	Isoflavones	3-(4-methoxyphenyl)-7-[(2S,3R,4S,5S,6R)-3,4,5-trihydroxy-6-(hydroxymethyl)oxan-2-yl]oxychromen-4-one	C22H22O9	MGJLSBDCWOSMHL-MIUGBVLSSA-N	InChI=1S/C22H22O9/c1-28-12-4-2-11(3-5-12)15-10-29-16-8-13(6-7-14(16)18(15)24)30-22-21(27)20(26)19(25)17(9-23)31-22/h2-8,10,17,19-23,25-27H,9H2,1H3/t17-,19-,20+,21-,22-/m1/s1	OC[C@H]1O[C@@H](Oc2ccc3c(c2)occ(c3=O)c2ccc(cc2)OC)[C@@H]([C@H]([C@@H]1O)O)O	P15121,P04637,Q16236,P51151,P05091,Q9UNA4,P60568,Q96QE3,P38398	9
Wogonin	Flavones	5,7-dihydroxy-8-methoxy-2-phenylchromen-4-one	C16H12O5	XLTFNNCXVBYBSX-UHFFFAOYSA-N	InChI=1S/C16H12O5/c1-20-15-12(19)7-10(17)14-11(18)8-13(21-16(14)15)9-5-3-2-4-6-9/h2-8,17,19H,1H3	COc1c(O)cc(c2c1oc(cc2=O)c1ccccc1)O	P35354,P34969,P83916,P04637,P84022,P07550,P03372,Q16445,O75496,O95398,O94925,P35030	12
b"3-Deoxy-O-Methylsappanol"	Others	(3R,4S)-3-[(4-hydroxyphenyl)methyl]-4-methoxy-2,4-dihydrochromene-3,7-diol	C17H18O5	NRDMATSOBGRQDO-DLBZAZTESA-N	InChI=1S/C17H18O5/c1-21-16-14-7-6-13(19)8-15(14)22-10-17(16,20)9-11-2-4-12(18)5-3-11/h2-8,16,18-20H,9-10H2,1H3/t16-,17+/m0/s1	CO[C@H]1c2ccc(cc2OC[C@]1(O)Cc1ccc(cc1)O)O	P10721,P12931,P11362,P00533,P35968	5
Xambioona	Flavanones	(2S)-2-(2,2-dimethylchromen-6-yl)-8,8-dimethyl-2,3-dihydropyrano[2,3-f]chromen-4-one	C25H24O4	FGJUXFVUOCKRCY-QFIPXVFZSA-N	InChI=1S/C25H24O4/c1-24(2)11-9-16-13-15(5-7-20(16)28-24)22-14-19(26)17-6-8-21-18(23(17)27-22)10-12-25(3,4)29-21/h5-13,22H,14H2,1-4H3/t22-/m0/s1	O=C1C[C@H](Oc2c1ccc1c2C=CC(O1)(C)C)c1ccc2c(c1)C=CC(O2)(C)C	P18031	1
Sid489025	Flavonols	2-(3,4-dimethoxyphenyl)-5-hydroxy-3,6,7,8-tetramethoxychromen-4-one	C21H22O9	JDVPHCLYMGBZLE-UHFFFAOYSA-N	InChI=1S/C21H22O9/c1-24-11-8-7-10(9-12(11)25-2)16-18(26-3)14(22)13-15(23)19(27-4)21(29-6)20(28-5)17(13)30-16/h7-9,23H,1-6H3	COc1cc(ccc1OC)c1oc2c(OC)c(OC)c(c(c2c(=O)c1OC)O)OC	Q9BUF5,P83916,P43220,O75496,Q13526,Q9NR56,Q96QE3,Q13148,P10636,Q16236,P10253	11
Mulberrofuran C	Others	[(1S,2R,6R)-2-[2,6-dihydroxy-4-(6-hydroxy-1-benzofuran-2-yl)phenyl]-6-(2,4-dihydroxyphenyl)-4-methylcyclohex-3-en-1-yl]-(2,4-dihydroxyphenyl)methanone	C34H28O9	WTGKDESIYCVAOP-UNTHUGQZSA-N	InChI=1S/C34H28O9/c1-16-8-24(22-6-4-19(35)13-26(22)38)32(34(42)23-7-5-20(36)14-27(23)39)25(9-16)33-28(40)10-18(11-29(33)41)30-12-17-2-3-21(37)15-31(17)43-30/h2-7,9-15,24-25,32,35-41H,8H2,1H3/t24-,25+,32-/m0/s1	Oc1ccc(c(c1)O)[C@@H]1CC(=C[C@H]([C@H]1C(=O)c1ccc(cc1O)O)c1c(O)cc(cc1O)c1cc2c(o1)cc(cc2)O)C	P18031,P51452	2
Albafuran A	Others	4-[(2E)-3,7-dimethylocta-2,6-dienyl]-5-(6-hydroxy-1-benzofuran-2-yl)benzene-1,3-diol	C24H26O4	KGOOVUKZICPAIZ-FRKPEAEDSA-N	InChI=1S/C24H26O4/c1-15(2)5-4-6-16(3)7-10-20-21(12-19(26)13-22(20)27)24-11-17-8-9-18(25)14-23(17)28-24/h5,7-9,11-14,25-27H,4,6,10H2,1-3H3/b16-7+	C/C(=CCc1c(O)cc(cc1c1oc2c(c1)ccc(c2)O)O)/CCC=C(C)C	P18031	1
Galuteolin	Flavones	2-(3,4-dihydroxyphenyl)-5-hydroxy-7-[(2S,3R,4S,5S,6R)-3,4,5-trihydroxy-6-(hydroxymethyl)oxan-2-yl]oxychromen-4-one	C21H20O11	PEFNSGRTCBGNAN-QNDFHXLGSA-N	InChI=1S/C21H20O11/c22-7-16-18(27)19(28)20(29)21(32-16)30-9-4-12(25)17-13(26)6-14(31-15(17)5-9)8-1-2-10(23)11(24)3-8/h1-6,16,18-25,27-29H,7H2/t16-,18-,19+,20-,21-/m1/s1	OC[C@H]1O[C@@H](Oc2cc(O)c3c(c2)oc(cc3=O)c2ccc(c(c2)O)O)[C@@H]([C@H]([C@@H]1O)O)O	O94782,P00747,Q9NUW8,P39748,O75164,P04637,P24298,Q9Y468,O75496,Q13526,P01375,Q99700,Q96QE3,O75874,P18031,Q9Y253,Q9UBT6,Q14191,Q9UNA4,P60568	20
b"4-O-Methyl-8-Prenylnaringenin"	Flavanones	(2S)-5,7-dihydroxy-2-(4-methoxyphenyl)-8-(3-methylbut-2-enyl)-2,3-dihydrochromen-4-one	C21H22O5	CTFJUDTWKJHYNX-IBGZPJMESA-N	InChI=1S/C21H22O5/c1-12(2)4-9-15-16(22)10-17(23)20-18(24)11-19(26-21(15)20)13-5-7-14(25-3)8-6-13/h4-8,10,19,22-23H,9,11H2,1-3H3/t19-/m0/s1	COc1ccc(cc1)[C@@H]1CC(=O)c2c(O1)c(CC=C(C)C)c(cc2O)O	Q9UNQ0	1
b"4-O-Methyldiplacone"	Flavanones	(2S)-6-[(2E)-3,7-dimethylocta-2,6-dienyl]-5,7-dihydroxy-2-(3-hydroxy-4-methoxyphenyl)-2,3-dihydrochromen-4-one	C26H30O6	FVUVHWPNLPHERN-SICWBLJQSA-N	InChI=1S/C26H30O6/c1-15(2)6-5-7-16(3)8-10-18-19(27)13-24-25(26(18)30)21(29)14-23(32-24)17-9-11-22(31-4)20(28)12-17/h6,8-9,11-13,23,27-28,30H,5,7,10,14H2,1-4H3/b16-8+/t23-/m0/s1	COc1ccc(cc1O)[C@@H]1CC(=O)c2c(O1)cc(c(c2O)C/C=C(/CCC=C(C)C)C)O	P22303	1
Lithospermic Acid	Others	(2S,3S)-4-[(E)-3-[(1R)-1-carboxy-2-(3,4-dihydroxyphenyl)ethoxy]-3-oxoprop-1-enyl]-2-(3,4-dihydroxyphenyl)-7-hydroxy-2,3-dihydro-1-benzofuran-3-carboxylic acid	C27H22O12	UJZQBMQZMKFSRV-RGKBJLTCSA-N	InChI=1S/C27H22O12/c28-15-5-1-12(9-18(15)31)10-20(26(34)35)38-21(33)8-4-13-2-7-17(30)25-22(13)23(27(36)37)24(39-25)14-3-6-16(29)19(32)11-14/h1-9,11,20,23-24,28-32H,10H2,(H,34,35)(H,36,37)/b8-4+/t20-,23+,24-/m1/s1	O=C(O[C@@H](C(=O)O)Cc1ccc(c(c1)O)O)/C=C/c1ccc(c2c1[C@H](C(=O)O)[C@H](O2)c1ccc(c(c1)O)O)O	O43570,P22748,P43166,P00915	4
b"7-Hydroxy-4-Methoxy-3-(3-Hydroxy-3-Methyl-Trans-But-1-Enyl)-5-(3-Methylbut-2-Enyl)Flavanone"	Flavanones	(2S)-7-hydroxy-2-[3-[(E)-3-hydroxy-3-methylbut-1-enyl]-4-methoxy-5-(3-methylbut-2-enyl)phenyl]-2,3-dihydrochromen-4-one	C26H30O5	SRFNFECUBWLUHV-YSESTWPTSA-N	InChI=1S/C26H30O5/c1-16(2)6-7-17-12-19(13-18(25(17)30-5)10-11-26(3,4)29)23-15-22(28)21-9-8-20(27)14-24(21)31-23/h6,8-14,23,27,29H,7,15H2,1-5H3/b11-10+/t23-/m0/s1	COc1c(CC=C(C)C)cc(cc1/C=C/C(O)(C)C)[C@@H]1CC(=O)c2c(O1)cc(cc2)O	P18031	1
Boeravinone A	Isoflavones	9,11-dihydroxy-6-methoxy-10-methyl-6H-chromeno[3,4-b]chromen-12-one	C18H14O6	TXTGITRXQUOAJM-UHFFFAOYSA-N	InChI=1S/C18H14O6/c1-8-10(19)7-12-14(15(8)20)16(21)13-9-5-3-4-6-11(9)24-18(22-2)17(13)23-12/h3-7,18-20H,1-2H3	COC1Oc2ccccc2c2c1oc1cc(O)c(c(c1c2=O)O)C	Q9UNQ0	1
b"5,6,7,3,4,5-Hexamethoxyflavone"	Flavones	5,6,7-trimethoxy-2-(3,4,5-trimethoxyphenyl)chromen-4-one	C21H22O8	DYDFNKUHYXHWFM-UHFFFAOYSA-N	InChI=1S/C21H22O8/c1-23-15-7-11(8-16(24-2)19(15)26-4)13-9-12(22)18-14(29-13)10-17(25-3)20(27-5)21(18)28-6/h7-10H,1-6H3	COc1c(OC)cc(cc1OC)c1cc(=O)c2c(o1)cc(c(c2OC)OC)OC	P08183	1
Daphnodorin F	Flavanonol	</td></tr>\r\n\t\t\t\t<tr><td align=right><b>Synonyms: &nbsp</b>	C30H22O10	KVPJDVHJFGPPAB-XOHQIPOJSA-N	InChI=1S/C30H22O10/c31-16-5-1-14(2-6-16)22-10-9-19-20(34)13-24-26(27(19)38-22)29(37)28(36)25-21(35)11-18(33)12-23(25)39-30(29,40-24)15-3-7-17(32)8-4-15/h1-8,11-13,22,31-35,37H,9-10H2/t22-,29+,30+/m0/s1	Oc1ccc(cc1)[C@@H]1CCc2c(O1)c1c(cc2O)O[C@@]2([C@]1(O)C(=O)c1c(O)cc(cc1O2)O)c1ccc(cc1)O	P14780,P08254,P08253,P45452	4
2-(4-Hydroxyphenyl)-5-(E)-Propenylbenzofuran	Others	4-[5-[(E)-prop-1-enyl]-1-benzofuran-2-yl]phenol	C17H14O2	OAMUEWCGJSSPRS-NSCUHMNNSA-N	InChI=1S/C17H14O2/c1-2-3-12-4-9-16-14(10-12)11-17(19-16)13-5-7-15(18)8-6-13/h2-11,18H,1H3/b3-2+	C/C=C/c1ccc2c(c1)cc(o2)c1ccc(cc1)O	O14684,P09917	2
Pachypodol	Flavonols	5-hydroxy-2-(4-hydroxy-3-methoxyphenyl)-3,7-dimethoxychromen-4-one	C18H16O7	KQFUXLQBMQGNRT-UHFFFAOYSA-N	InChI=1S/C18H16O7/c1-22-10-7-12(20)15-14(8-10)25-17(18(24-3)16(15)21)9-4-5-11(19)13(6-9)23-2/h4-8,19-20H,1-3H3	COc1cc(O)c2c(c1)oc(c(c2=O)OC)c1ccc(c(c1)OC)O	Q9UNQ0	1
b"3-Prenylnaringenin"	Flavones	5,7-dihydroxy-2-[4-hydroxy-3-(3-methylbut-2-enyl)phenyl]chromen-4-one	C20H18O5	PFQMUQWFRINBBG-UHFFFAOYSA-N	InChI=1S/C20H18O5/c1-11(2)3-4-12-7-13(5-6-15(12)22)18-10-17(24)20-16(23)8-14(21)9-19(20)25-18/h3,5-10,21-23H,4H2,1-2H3	CC(=CCc1cc(ccc1O)c1cc(=O)c2c(o1)cc(cc2O)O)C	P18031	1
Datiscetin	Flavonols	3,5,7-trihydroxy-2-(2-hydroxyphenyl)chromen-4-one	C15H10O6	WCNLFPKXBGWWDS-UHFFFAOYSA-N	InChI=1S/C15H10O6/c16-7-5-10(18)12-11(6-7)21-15(14(20)13(12)19)8-3-1-2-4-9(8)17/h1-6,16-18,20H	Oc1cc(O)c2c(c1)oc(c(c2=O)O)c1ccccc1O	P05067	1
2,3-Dihydroamentoflavone	Flavones	8-[5-[(2S)-5,7-dihydroxy-4-oxo-2,3-dihydrochromen-2-yl]-2-hydroxyphenyl]-5,7-dihydroxy-2-(4-hydroxyphenyl)chromen-4-one	C30H20O10	JVBCTBWKMWXQQO-VWLOTQADSA-N	InChI=1S/C30H20O10/c31-15-4-1-13(2-5-15)24-12-23(38)29-21(36)10-20(35)27(30(29)40-24)17-7-14(3-6-18(17)33)25-11-22(37)28-19(34)8-16(32)9-26(28)39-25/h1-10,12,25,31-36H,11H2/t25-/m0/s1	Oc1ccc(cc1)c1cc(=O)c2c(o1)c(c(cc2O)O)c1cc(ccc1O)[C@@H]1CC(=O)c2c(O1)cc(cc2O)O	P43235,P56817	2
Flemingsin	Isoflavones	5,7-dihydroxy-3-(4-hydroxy-3-methoxyphenyl)-6,8-bis(3-methylbut-2-enyl)chromen-4-one	C26H28O6	HTHLDJJBNQWUJJ-UHFFFAOYSA-N	InChI=1S/C26H28O6/c1-14(2)6-9-17-23(28)18(10-7-15(3)4)26-22(24(17)29)25(30)19(13-32-26)16-8-11-20(27)21(12-16)31-5/h6-8,11-13,27-29H,9-10H2,1-5H3	COc1cc(ccc1O)c1coc2c(c1=O)c(O)c(c(c2CC=C(C)C)O)CC=C(C)C	P18031	1
5-Hydroxy-3-(4-Hydroxyphenyl)-7-[3,4,5-Trihydroxy-6-(Hydroxymethyl)Oxan-2-Yl]Oxychromen-4-One	Isoflavones	5-hydroxy-3-(4-hydroxyphenyl)-7-[3,4,5-trihydroxy-6-(hydroxymethyl)oxan-2-yl]oxychromen-4-one	C21H20O10	ZCOLJUOHXJRHDI-UHFFFAOYSA-N	InChI=1S/C21H20O10/c22-7-15-18(26)19(27)20(28)21(31-15)30-11-5-13(24)16-14(6-11)29-8-12(17(16)25)9-1-3-10(23)4-2-9/h1-6,8,15,18-24,26-28H,7H2	OCC1OC(Oc2cc(O)c3c(c2)occ(c3=O)c2ccc(cc2)O)C(C(C1O)O)O	Q16637,P51151,P38398,P04637,P02545,Q9UIF8,Q13148,Q9NR56,Q96QE3,P15428,Q16236	11
Erybreadin C	Others	(6aR,11aR)-4,8-bis(3-methylbut-2-enyl)-6a,11a-dihydro-6H-[1]benzofuro[3,2-c]chromene-3,9-diol	C25H28O4	SAXBNTXROWQAKX-CPJSRVTESA-N	InChI=1S/C25H28O4/c1-14(2)5-7-16-11-19-20-13-28-24-17(8-6-15(3)4)21(26)10-9-18(24)25(20)29-23(19)12-22(16)27/h5-6,9-12,20,25-27H,7-8,13H2,1-4H3/t20-,25-/m0/s1	CC(=CCc1cc2c(cc1O)O[C@@H]1[C@H]2COc2c1ccc(c2CC=C(C)C)O)C	P18031	1
Ombuine	Flavonols	3,5-dihydroxy-2-(3-hydroxy-4-methoxyphenyl)-7-methoxychromen-4-one	C17H14O7	BWORNNDZQGOKBY-UHFFFAOYSA-N	InChI=1S/C17H14O7/c1-22-9-6-11(19)14-13(7-9)24-17(16(21)15(14)20)8-3-4-12(23-2)10(18)5-8/h3-7,18-19,21H,1-2H3	COc1cc(O)c2c(c1)oc(c(c2=O)O)c1ccc(c(c1)O)OC	P27487,P47989	2
Lanceolatin	Flavones	2-phenylfuro[2,3-h]chromen-4-one	C17H10O3	NQNOTBRHBRJKKH-UHFFFAOYSA-N	InChI=1S/C17H10O3/c18-14-10-16(11-4-2-1-3-5-11)20-17-12(14)6-7-15-13(17)8-9-19-15/h1-10H	O=c1cc(oc2c1ccc1c2cco1)c1ccccc1	P18031	1
[5,7-Dihydroxy-2-(3,4,5-Trihydroxyphenyl)-3,4-Dihydro-2H-Chromen-3-Yl] 3,4,5-Trihydroxybenzoate	Flavan-3-ols	[5,7-dihydroxy-2-(3,4,5-trihydroxyphenyl)-3,4-dihydro-2H-chromen-3-yl] 3,4,5-trihydroxybenzoate	C22H18O11	WMBWREPUVVBILR-UHFFFAOYSA-N	InChI=1S/C22H18O11/c23-10-5-12(24)11-7-18(33-22(31)9-3-15(27)20(30)16(28)4-9)21(32-17(11)6-10)8-1-13(25)19(29)14(26)2-8/h1-6,18,21,23-30H,7H2	Oc1cc(O)c2c(c1)OC(C(C2)OC(=O)c1cc(O)c(c(c1)O)O)c1cc(O)c(c(c1)O)O	P00352,P27695,O94782,Q03164,Q9UBT6,P15428,Q92830,P10636,P16050,P51570,Q9NUW8,P28482,P11473,P46063,Q99714,B2RXH2,Q12809	17
2-(3,4-Dihydroxyphenyl)-3,7-Dihydroxy-5-Methoxychromen-4-One	Flavonols	2-(3,4-dihydroxyphenyl)-3,7-dihydroxy-5-methoxychromen-4-one	C16H12O7	RJBAXROZAXAEEM-UHFFFAOYSA-N	InChI=1S/C16H12O7/c1-22-11-5-8(17)6-12-13(11)14(20)15(21)16(23-12)7-2-3-9(18)10(19)4-7/h2-6,17-19,21H,1H3	COc1cc(O)cc2c1c(=O)c(c(o2)c1ccc(c(c1)O)O)O	Q9NPH5	1
Kushenol A	Flavanones	(2S)-5,7-dihydroxy-2-(2-hydroxyphenyl)-8-[(2R)-5-methyl-2-prop-1-en-2-ylhex-4-enyl]-2,3-dihydrochromen-4-one	C25H28O5	OGBMVWVBHWHRGD-MWTRTKDXSA-N	InChI=1S/C25H28O5/c1-14(2)9-10-16(15(3)4)11-18-20(27)12-21(28)24-22(29)13-23(30-25(18)24)17-7-5-6-8-19(17)26/h5-9,12,16,23,26-28H,3,10-11,13H2,1-2,4H3/t16-,23+/m1/s1	CC(=CC[C@@H](C(=C)C)Cc1c(O)cc(c2c1O[C@@H](CC2=O)c1ccccc1O)O)C	P56817	1
Fisetinidol	Flavan-3-ols	(2R,3S)-2-(3,4-dihydroxyphenyl)-3,4-dihydro-2H-chromene-3,7-diol	C15H14O5	VFZYLYJWCROVLO-DZGCQCFKSA-N	InChI=1S/C15H14O5/c16-10-3-1-8-5-13(19)15(20-14(8)7-10)9-2-4-11(17)12(18)6-9/h1-4,6-7,13,15-19H,5H2/t13-,15+/m0/s1	Oc1ccc2c(c1)O[C@@H]([C@H](C2)O)c1ccc(c(c1)O)O	Q9NPD5,Q9Y6L6	2
Kaempferol-3-O-Rhamnoside	Flavonols	5,7-dihydroxy-2-(4-hydroxyphenyl)-3-[(2R,3S,4S,5S,6R)-3,4,5-trihydroxy-6-methyloxan-2-yl]oxychromen-4-one	C21H20O10	SOSLMHZOJATCCP-QBWVUYDZSA-N	InChI=1S/C21H20O10/c1-8-15(25)17(27)18(28)21(29-8)31-20-16(26)14-12(24)6-11(23)7-13(14)30-19(20)9-2-4-10(22)5-3-9/h2-8,15,17-18,21-25,27-28H,1H3/t8-,15-,17+,18+,21-/m1/s1	Oc1ccc(cc1)c1oc2cc(O)cc(c2c(=O)c1O[C@H]1O[C@H](C)[C@H]([C@@H]([C@@H]1O)O)O)O	P16083	1
Licoarylcoumarin	Others	3-(2,4-dihydroxyphenyl)-7-hydroxy-5-methoxy-8-(2-methylbut-3-en-2-yl)chromen-2-one	C21H20O6	LCRIQVFKVCYUAO-UHFFFAOYSA-N	InChI=1S/C21H20O6/c1-5-21(2,3)18-16(24)10-17(26-4)14-9-13(20(25)27-19(14)18)12-7-6-11(22)8-15(12)23/h5-10,22-24H,1H2,2-4H3	C=CC(c1c(O)cc(c2c1oc(=O)c(c2)c1ccc(cc1O)O)OC)(C)C	Q16236	1
Axillarin	Flavonols	2-(3,4-dihydroxyphenyl)-5,7-dihydroxy-3,6-dimethoxychromen-4-one	C17H14O8	KIGVXRGRNLQNNI-UHFFFAOYSA-N	InChI=1S/C17H14O8/c1-23-16-10(20)6-11-12(13(16)21)14(22)17(24-2)15(25-11)7-3-4-8(18)9(19)5-7/h3-6,18-21H,1-2H3	COc1c(O)cc2c(c1O)c(=O)c(c(o2)c1ccc(c(c1)O)O)OC	P47989	1
Pentamethylquercetin	Flavonols	2-(3,4-dimethoxyphenyl)-3,5,7-trimethoxychromen-4-one	C20H20O7	ALGDHWVALRSLBT-UHFFFAOYSA-N	InChI=1S/C20H20O7/c1-22-12-9-15(25-4)17-16(10-12)27-19(20(26-5)18(17)21)11-6-7-13(23-2)14(8-11)24-3/h6-10H,1-5H3	COc1cc(OC)c2c(c1)oc(c(c2=O)OC)c1ccc(c(c1)OC)OC	Q9NUW8,P43220,P33527,P39748,Q9UNQ0,P17405,P00352,Q13526,P08183,P28482,Q96QE3,P08684,B2RXH2	13
Rataniaphenol Iii	Others	3-methoxy-4-[5-[(E)-prop-1-enyl]-1-benzofuran-2-yl]phenol	C18H16O3	LYELQAFKYBUWAN-ONEGZZNKSA-N	InChI=1S/C18H16O3/c1-3-4-12-5-8-16-13(9-12)10-18(21-16)15-7-6-14(19)11-17(15)20-2/h3-11,19H,1-2H3/b4-3+	C/C=C/c1ccc2c(c1)cc(o2)c1ccc(cc1OC)O	O14684,P09917	2
b"2-Methoxyformonetin"	Isoflavones	3-(2,4-dimethoxyphenyl)-7-hydroxychromen-4-one	C17H14O5	SSRCYGATNWFTBJ-UHFFFAOYSA-N	InChI=1S/C17H14O5/c1-20-11-4-6-12(15(8-11)21-2)14-9-22-16-7-10(18)3-5-13(16)17(14)19/h3-9,18H,1-2H3	COc1cc(OC)ccc1c1coc2c(c1=O)ccc(c2)O	P15428,P08684,Q9NPD5,Q9Y6L6,Q99714,B2RXH2	6
Phaseollidin	Others	(6aR,11aR)-10-(3-methylbut-2-enyl)-6a,11a-dihydro-6H-[1]benzofuro[3,2-c]chromene-3,9-diol	C20H20O4	OFWYIUYVHYPQNX-JXFKEZNVSA-N	InChI=1S/C20H20O4/c1-11(2)3-5-14-17(22)8-7-13-16-10-23-18-9-12(21)4-6-15(18)20(16)24-19(13)14/h3-4,6-9,16,20-22H,5,10H2,1-2H3/t16-,20-/m0/s1	CC(=CCc1c(O)ccc2c1O[C@@H]1[C@H]2COc2c1ccc(c2)O)C	P18031	1
Glycitein	Isoflavones	7-hydroxy-3-(4-hydroxyphenyl)-6-methoxychromen-4-one	C16H12O5	DXYUAIFZCFRPTH-UHFFFAOYSA-N	InChI=1S/C16H12O5/c1-20-15-6-11-14(7-13(15)18)21-8-12(16(11)19)9-2-4-10(17)5-3-9/h2-8,17-18H,1H3	COc1cc2c(cc1O)occ(c2=O)c1ccc(cc1)O	P47989	1
Licoagrocarpin	Others	(6aR,11aR)-9-methoxy-4-(3-methylbut-2-enyl)-6a,11a-dihydro-6H-[1]benzofuro[3,2-c]chromen-3-ol	C21H22O4	NYWUHXBEDBSRQB-UWJYYQICSA-N	InChI=1S/C21H22O4/c1-12(2)4-6-15-18(22)9-8-16-20(15)24-11-17-14-7-5-13(23-3)10-19(14)25-21(16)17/h4-5,7-10,17,21-22H,6,11H2,1-3H3/t17-,21-/m0/s1	COc1ccc2c(c1)O[C@@H]1[C@H]2COc2c1ccc(c2CC=C(C)C)O	P18031	1
Erythraddison Ii	Isoflavones	3-(2,4-dihydroxyphenyl)-7-hydroxy-6,8-bis(3-methylbut-2-enyl)chromen-4-one	C25H26O5	DPJZYONMQLGZJE-UHFFFAOYSA-N	InChI=1S/C25H26O5/c1-14(2)5-7-16-11-20-24(29)21(18-10-8-17(26)12-22(18)27)13-30-25(20)19(23(16)28)9-6-15(3)4/h5-6,8,10-13,26-28H,7,9H2,1-4H3	CC(=CCc1cc2c(=O)c(coc2c(c1O)CC=C(C)C)c1ccc(cc1O)O)C	P18031	1
Swertifrancheside	Flavones	2-[2-(3,4-dihydroxyphenyl)-5,7-dihydroxy-4-oxo-6-[(2S,3R,4R,5S,6R)-3,4,5-trihydroxy-6-(hydroxymethyl)oxan-2-yl]chromen-8-yl]-1,4,8-trihydroxy-6-methoxyxanthen-9-one	C35H28O17	JAANJQNFIJSRTK-KYRPIRIWSA-N	InChI=1S/C35H28O17/c1-49-11-5-15(39)22-19(6-11)51-33-17(41)7-12(26(42)24(33)29(22)45)21-28(44)25(35-32(48)31(47)27(43)20(9-36)52-35)30(46)23-16(40)8-18(50-34(21)23)10-2-3-13(37)14(38)4-10/h2-8,20,27,31-32,35-39,41-44,46-48H,9H2,1H3/t20-,27-,31+,32-,35+/m1/s1	OC[C@H]1O[C@H]([C@@H]([C@H]([C@@H]1O)O)O)c1c(O)c(c2c(c1O)c(=O)cc(o2)c1ccc(c(c1)O)O)c1cc(O)c2c(c1O)c(=O)c1c(o2)cc(cc1O)OC	P06746	1
Robustaflavone	Flavones	6-[5-(5,7-dihydroxy-4-oxochromen-2-yl)-2-hydroxyphenyl]-5,7-dihydroxy-2-(4-hydroxyphenyl)chromen-4-one	C30H18O10	BORWSEZUWHQTOK-UHFFFAOYSA-N	InChI=1S/C30H18O10/c31-15-4-1-13(2-5-15)23-11-22(37)29-26(39-23)12-20(35)27(30(29)38)17-7-14(3-6-18(17)33)24-10-21(36)28-19(34)8-16(32)9-25(28)40-24/h1-12,31-35,38H	Oc1ccc(cc1)c1cc(=O)c2c(o1)cc(c(c2O)c1cc(ccc1O)c1cc(=O)c2c(o1)cc(cc2O)O)O	P18031,P56817	2
(+)-(2R)Kazinol I	Others	5-[(2R)-7-hydroxy-3,4-dihydro-2H-chromen-2-yl]-3,4-bis(3-methylbut-2-enyl)benzene-1,2-diol	C25H30O4	AOUGZVKCLQLQNU-HSZRJFAPSA-N	InChI=1S/C25H30O4/c1-15(2)5-10-19-20(11-6-16(3)4)25(28)22(27)14-21(19)23-12-8-17-7-9-18(26)13-24(17)29-23/h5-7,9,13-14,23,26-28H,8,10-12H2,1-4H3/t23-/m1/s1	CC(=CCc1c(cc(c(c1CC=C(C)C)O)O)[C@H]1CCc2c(O1)cc(cc2)O)C	P03372,Q92731	2
Kaempferol-3-O-(3\\,4\\"-Diacetyl-2\\",6\\"-Di-E-P-Coumaroyl)-Glucoside	Flavonols	[(2R,3R,4S,5R,6S)-3,4-diacetyloxy-6-[5,7-dihydroxy-2-(4-hydroxyphenyl)-4-oxochromen-3-yl]oxy-5-[(E)-3-(4-hydroxyphenyl)prop-2-enoyl]oxyoxan-2-yl]methyl (E)-3-(4-hydroxyphenyl)prop-2-enoate	C43H36O17	IFLHDGGEJKVLAF-FEMPFSAESA-N	InChI=1S/C43H36O17/c1-22(44)55-39-33(21-54-34(51)17-7-24-3-11-27(46)12-4-24)58-43(42(41(39)56-23(2)45)59-35(52)18-8-25-5-13-28(47)14-6-25)60-40-37(53)36-31(50)19-30(49)20-32(36)57-38(40)26-9-15-29(48)16-10-26/h3-20,33,39,41-43,46-50H,21H2,1-2H3/b17-7+,18-8+/t33-,39-,41+,42-,43+/m1/s1	O=C(OC[C@H]1O[C@@H](Oc2c(oc3c(c2=O)c(O)cc(c3)O)c2ccc(cc2)O)[C@@H]([C@H]([C@@H]1OC(=O)C)OC(=O)C)OC(=O)/C=C/c1ccc(cc1)O)/C=C/c1ccc(cc1)O	O43570,P22748,P00918,P43166,P00915	5
Tiliroside	Flavonols	[(2R,3S,4S,5R,6S)-6-[5,7-dihydroxy-2-(4-hydroxyphenyl)-4-oxochromen-3-yl]oxy-3,4,5-trihydroxyoxan-2-yl]methyl (E)-3-(4-hydroxyphenyl)prop-2-enoate	C30H26O13	DVGGLGXQSFURLP-VWMSDXGPSA-N	InChI=1S/C30H26O13/c31-16-6-1-14(2-7-16)3-10-22(35)40-13-21-24(36)26(38)27(39)30(42-21)43-29-25(37)23-19(34)11-18(33)12-20(23)41-28(29)15-4-8-17(32)9-5-15/h1-12,21,24,26-27,30-34,36,38-39H,13H2/b10-3+/t21-,24-,26+,27-,30+/m1/s1	O=C(OC[C@H]1O[C@@H](Oc2c(oc3c(c2=O)c(O)cc(c3)O)c2ccc(cc2)O)[C@@H]([C@H]([C@@H]1O)O)O)/C=C/c1ccc(cc1)O	P43166,P47989,P00915,P22748,O43570,P08684	6
(2R,3S)-2-(3,4-Dihydroxyphenyl)-3,5,7-Trihydroxy-2,3-Dihydrochromen-4-One	Flavanonol	(2R,3S)-2-(3,4-dihydroxyphenyl)-3,5,7-trihydroxy-2,3-dihydrochromen-4-one	C15H12O7	CXQWRCVTCMQVQX-HUUCEWRRSA-N	InChI=1S/C15H12O7/c16-7-4-10(19)12-11(5-7)22-15(14(21)13(12)20)6-1-2-8(17)9(18)3-6/h1-5,14-19,21H/t14-,15-/m1/s1	Oc1cc2O[C@H](c3ccc(c(c3)O)O)[C@@H](C(=O)c2c(c1)O)O	P27695,P06746,Q9UIF8,P46063,B2RXH2,P10253	6
b"2-O-Demethylbidwillol B"	Others	4-(6-hydroxy-1-benzofuran-2-yl)-2-(3-methylbut-2-enyl)benzene-1,3-diol	C19H18O4	JTWAOWXXBMXCGP-UHFFFAOYSA-N	InChI=1S/C19H18O4/c1-11(2)3-6-14-16(21)8-7-15(19(14)22)18-9-12-4-5-13(20)10-17(12)23-18/h3-5,7-10,20-22H,6H2,1-2H3	CC(=CCc1c(O)ccc(c1O)c1cc2c(o1)cc(cc2)O)C	P18031	1
b"6-Geranyl-3,5,5,7-Tetrahydroxy-4-Methoxyflavanone"	Flavanones	2-(3,5-dihydroxy-4-methoxyphenyl)-6-[(2E)-3,7-dimethylocta-2,6-dienyl]-5,7-dihydroxy-2,3-dihydrochromen-4-one	C26H30O7	GMGRYHOHJJROMP-OVCLIPMQSA-N	InChI=1S/C26H30O7/c1-14(2)6-5-7-15(3)8-9-17-18(27)12-23-24(25(17)31)19(28)13-22(33-23)16-10-20(29)26(32-4)21(30)11-16/h6,8,10-12,22,27,29-31H,5,7,9,13H2,1-4H3/b15-8+	COc1c(O)cc(cc1O)C1CC(=O)c2c(O1)cc(c(c2O)C/C=C(/CCC=C(C)C)C)O	P22303	1
b"5,7-Dihydroxy-3,3,4,6-Tetramethoxyflavone"	Flavonols	2-(3,4-dimethoxyphenyl)-5,7-dihydroxy-3,6-dimethoxychromen-4-one	C19H18O8	SDTFURCSGWUESP-UHFFFAOYSA-N	InChI=1S/C19H18O8/c1-23-11-6-5-9(7-12(11)24-2)17-19(26-4)16(22)14-13(27-17)8-10(20)18(25-3)15(14)21/h5-8,20-21H,1-4H3	COc1cc(ccc1OC)c1oc2cc(O)c(c(c2c(=O)c1OC)O)OC	Q9BUF5	1
b"3,5,7-Trihydroxy-3,4,5,6-Tetramethoxyflavone"	Flavonols	5,7-dihydroxy-2-(3-hydroxy-4,5-dimethoxyphenyl)-3,6-dimethoxychromen-4-one	C19H18O9	WTTGIVJDHDPLCL-UHFFFAOYSA-N	InChI=1S/C19H18O9/c1-24-12-6-8(5-9(20)17(12)25-2)16-19(27-4)15(23)13-11(28-16)7-10(21)18(26-3)14(13)22/h5-7,20-22H,1-4H3	COc1c(O)cc(cc1OC)c1oc2cc(O)c(c(c2c(=O)c1OC)O)OC	Q9BUF5	1
b"(2S)-4,5,7-Trihydroxyflavan-(4Beta->8)-Afzelechin"	Flavan-3-ols	(2R,3S)-8-[(2S,4R)-5,7-dihydroxy-2-(4-hydroxyphenyl)-3,4-dihydro-2H-chromen-4-yl]-2-(4-hydroxyphenyl)-3,4-dihydro-2H-chromene-3,5,7-triol	C30H26O9	FWNROEJRQURIKY-VGGRNRAKSA-N	InChI=1S/C30H26O9/c31-16-5-1-14(2-6-16)25-12-20(27-22(35)9-18(33)10-26(27)38-25)28-23(36)13-21(34)19-11-24(37)29(39-30(19)28)15-3-7-17(32)8-4-15/h1-10,13,20,24-25,29,31-37H,11-12H2/t20-,24+,25+,29-/m1/s1	Oc1ccc(cc1)[C@H]1Oc2cc(O)cc(c2[C@@H](C1)c1c(O)cc(c2c1O[C@H](c1ccc(cc1)O)[C@H](C2)O)O)O	P15692,P17948,P49763	3
Cianidanol	Flavan-3-ols	(2R,3S)-2-(3,4-dihydroxyphenyl)-3,4-dihydro-2H-chromene-3,5,7-triol	C15H14O6	PFTAWBLQPZVEMU-DZGCQCFKSA-N	InChI=1S/C15H14O6/c16-8-4-11(18)9-6-13(20)15(21-14(9)5-8)7-1-2-10(17)12(19)3-7/h1-5,13,15-20H,6H2/t13-,15+/m0/s1	Oc1cc2O[C@H](c3ccc(c(c3)O)O)[C@H](Cc2c(c1)O)O	P27695,P15289,P06746,P35354,Q6W5P4,Q9Y6L6,Q16637,P47989,Q9NPD5,P39748,P24298,P23219,P00734,Q99714,P46063,Q01453,P53355,P10636,Q96KQ7,B2RXH2	20
Pomiferin	Isoflavones	3-(3,4-dihydroxyphenyl)-5-hydroxy-8,8-dimethyl-6-(3-methylbut-2-enyl)pyrano[2,3-h]chromen-4-one	C25H24O6	GHCZYXUOYFOXIP-UHFFFAOYSA-N	InChI=1S/C25H24O6/c1-13(2)5-7-15-21(28)20-22(29)17(14-6-8-18(26)19(27)11-14)12-30-24(20)16-9-10-25(3,4)31-23(15)16/h5-6,8-12,26-28H,7H2,1-4H3	CC(=CCc1c2OC(C)(C)C=Cc2c2c(c1O)c(=O)c(co2)c1ccc(c(c1)O)O)C	P07900,P39748,Q13526,P28482,P11712,P10636,Q9NPD5,Q9Y6L6,P33261,P17405,P00352,O75496,P01215,O75874,Q03164,Q9UNA4,Q16637,P38398,B2RXH2,P83916,Q969S8,P04637,Q9UBT6	23
Nobiletin	Flavones	2-(3,4-dimethoxyphenyl)-5,6,7,8-tetramethoxychromen-4-one	C21H22O8	MRIAQLRQZPPODS-UHFFFAOYSA-N	InChI=1S/C21H22O8/c1-23-13-8-7-11(9-15(13)24-2)14-10-12(22)16-17(25-3)19(26-4)21(28-6)20(27-5)18(16)29-14/h7-10H,1-6H3	COc1cc(ccc1OC)c1cc(=O)c2c(o1)c(OC)c(c(c2OC)OC)OC	Q92830,Q9NPD5,Q9Y6L6,P43220,Q9UNQ0,P00352,O94956,O75496,Q13526,Q99714,P08183,P28482,Q13148,Q96QE3,Q03164,Q96KQ7,B2RXH2	17
Sinensetin	Flavones	2-(3,4-dimethoxyphenyl)-5,6,7-trimethoxychromen-4-one	C20H20O7	LKMNXYDUQXAUCZ-UHFFFAOYSA-N	InChI=1S/C20H20O7/c1-22-13-7-6-11(8-15(13)23-2)14-9-12(21)18-16(27-14)10-17(24-3)19(25-4)20(18)26-5/h6-10H,1-5H3	COc1ccc(cc1OC)c1cc(=O)c2c(o1)cc(c(c2OC)OC)OC	Q03164,Q9UBT6,Q92830,Q9UNQ0,P04798,P08183	6
Demethoxymatteucinol	Flavanones	(2S)-5,7-dihydroxy-6,8-dimethyl-2-phenyl-2,3-dihydrochromen-4-one	C17H16O4	HAIHGFWQOPJMPV-ZDUSSCGKSA-N	InChI=1S/C17H16O4/c1-9-15(19)10(2)17-14(16(9)20)12(18)8-13(21-17)11-6-4-3-5-7-11/h3-7,13,19-20H,8H2,1-2H3/t13-/m0/s1	Cc1c2O[C@@H](CC(=O)c2c(c(c1O)C)O)c1ccccc1	P83916,Q9UNA4,Q99700	3
Butin	Flavanones	(2S)-2-(3,4-dihydroxyphenyl)-7-hydroxy-2,3-dihydrochromen-4-one	C15H12O5	MJBPUQUGJNAPAZ-AWEZNQCLSA-N	InChI=1S/C15H12O5/c16-9-2-3-10-12(18)7-14(20-15(10)6-9)8-1-4-11(17)13(19)5-8/h1-6,14,16-17,19H,7H2/t14-/m0/s1	Oc1ccc2c(c1)O[C@@H](CC2=O)c1ccc(c(c1)O)O	P11511	1
n.a.	Others	</td></tr>\r\n\t\t\t\t<tr><td align=right><b>Synonyms: &nbsp</b>	C16H12O5	HUKSJTUUSUGIDC-UHFFFAOYSA-N	InChI=1S/C16H12O5/c17-8-1-2-9-12(3-8)18-6-11-10-4-14-15(20-7-19-14)5-13(10)21-16(9)11/h1-5,11,16-17H,6-7H2	Oc1ccc2c(c1)OCC1C2Oc2c1cc1c(c2)OCO1	P08684	1
Kuromanin	Others	(2S,3R,4S,5S,6R)-2-[2-(3,4-dihydroxyphenyl)-5,7-dihydroxychromenylium-3-yl]oxy-6-(hydroxymethyl)oxane-3,4,5-triol	C21H20O11	RKWHWFONKJEUEF-GQUPQBGVSA-O	InChI=1S/C21H20O11/c22-7-16-17(27)18(28)19(29)21(32-16)31-15-6-10-12(25)4-9(23)5-14(10)30-20(15)8-1-2-11(24)13(26)3-8/h1-6,16-19,21-22,27-29H,7H2,(H3-,23,24,25,26)/p+1/t16-,17-,18+,19-,21-/m1/s1	OC[C@H]1O[C@@H](Oc2cc3c(O)cc(cc3[o+]c2c2ccc(c(c2)O)O)O)[C@@H]([C@H]([C@@H]1O)O)O	P28907	1
Epiafzelechin (2R,3R)(-)	Flavan-3-ols	(2R,3R)-2-(4-hydroxyphenyl)-3,4-dihydro-2H-chromene-3,5,7-triol	C15H14O5	RSYUFYQTACJFML-UKRRQHHQSA-N	InChI=1S/C15H14O5/c16-9-3-1-8(2-4-9)15-13(19)7-11-12(18)5-10(17)6-14(11)20-15/h1-6,13,15-19H,7H2/t13-,15-/m1/s1	Oc1ccc(cc1)[C@H]1Oc2cc(O)cc(c2C[C@H]1O)O	Q9NPD5,P35354,Q9Y6L6,P23219	4
Vicenin-2	Flavones	5,7-dihydroxy-2-(4-hydroxyphenyl)-6,8-bis[(2S,3R,4R,5S,6R)-3,4,5-trihydroxy-6-(hydroxymethyl)oxan-2-yl]chromen-4-one	C27H30O15	FIAAVMJLAGNUKW-VQVVXJKKSA-N	InChI=1S/C27H30O15/c28-6-12-17(32)21(36)23(38)26(41-12)15-19(34)14-10(31)5-11(8-1-3-9(30)4-2-8)40-25(14)16(20(15)35)27-24(39)22(37)18(33)13(7-29)42-27/h1-5,12-13,17-18,21-24,26-30,32-39H,6-7H2/t12-,13-,17-,18-,21+,22+,23-,24-,26+,27+/m1/s1	OC[C@H]1O[C@H]([C@@H]([C@H]([C@@H]1O)O)O)c1c(O)c([C@@H]2O[C@H](CO)[C@H]([C@@H]([C@H]2O)O)O)c(c2c1oc(cc2=O)c1ccc(cc1)O)O	P27695,P18031,P04062,P63092,Q96KQ7,B2RXH2,P10253	7
Jaceosidine	Flavones	5,7-dihydroxy-2-(4-hydroxy-3-methoxyphenyl)-6-methoxychromen-4-one	C17H14O7	GLAAQZFBFGEBPS-UHFFFAOYSA-N	InChI=1S/C17H14O7/c1-22-13-5-8(3-4-9(13)18)12-6-10(19)15-14(24-12)7-11(20)17(23-2)16(15)21/h3-7,18,20-21H,1-2H3	COc1cc(ccc1O)c1cc(=O)c2c(o1)cc(c(c2O)OC)O	P59538	1
(+/-)-Moracin P	Others	5-(6-hydroxy-7,7-dimethyl-5,6-dihydrofuro[3,2-g]chromen-2-yl)benzene-1,3-diol	C19H18O5	QFUCSEIKNTUPPA-UHFFFAOYSA-N	InChI=1S/C19H18O5/c1-19(2)18(22)7-11-3-10-6-15(23-16(10)9-17(11)24-19)12-4-13(20)8-14(21)5-12/h3-6,8-9,18,20-22H,7H2,1-2H3	Oc1cc(O)cc(c1)c1oc2c(c1)cc1c(c2)OC(C(C1)O)(C)C	P43220,O75496,Q03431,P17405,Q16665	5
Uralenol	Flavonols	2-[3,4-dihydroxy-5-(3-methylbut-2-enyl)phenyl]-3,5,7-trihydroxychromen-4-one	C20H18O7	WOMWVGHYSNATOB-UHFFFAOYSA-N	InChI=1S/C20H18O7/c1-9(2)3-4-10-5-11(6-14(23)17(10)24)20-19(26)18(25)16-13(22)7-12(21)8-15(16)27-20/h3,5-8,21-24,26H,4H2,1-2H3	CC(=CCc1cc(cc(c1O)O)c1oc2cc(O)cc(c2c(=O)c1O)O)C	P18031	1
Morin	Flavonols	2-(2,4-dihydroxyphenyl)-3,5,7-trihydroxychromen-4-one	C15H10O7	YXOLAZRVSSWPPT-UHFFFAOYSA-N	InChI=1S/C15H10O7/c16-6-1-2-8(9(18)3-6)15-14(21)13(20)12-10(19)4-7(17)5-11(12)22-15/h1-5,16-19,21H	Oc1ccc(c(c1)O)c1oc2cc(O)cc(c2c(=O)c1O)O	P27695,P19838,Q13332,O00167,P06746,Q9BUF5,Q9Y6L6,Q9HC97,Q9NUW8,P47989,Q9NPD5,Q96S37,P0DMS8,P21728,P33527,P53350,P39748,Q9UNQ0,P04637,Q92887,P05067,P43405,O94956,Q13526,Q9UIF8,Q99714,P46063,Q07820,Q92731,P11388,Q9Y253,Q04760,O75604,Q03164,P53355,P10636,P15428,Q9UBT6,P56817,Q99549,B2RXH2,P40225	42
Wogonin 7-O-Glucuronide	Flavones	(2S,3S,4S,5R,6S)-3,4,5-trihydroxy-6-(5-hydroxy-8-methoxy-4-oxo-2-phenylchromen-7-yl)oxyoxane-2-carboxylic acid	C22H20O11	LNOHXHDWGCMVCO-NTKSAMNMSA-N	InChI=1S/C22H20O11/c1-30-18-13(32-22-17(27)15(25)16(26)20(33-22)21(28)29)8-11(24)14-10(23)7-12(31-19(14)18)9-5-3-2-4-6-9/h2-8,15-17,20,22,24-27H,1H3,(H,28,29)/t15-,16-,17+,20-,22+/m0/s1	COc1c(O[C@@H]2O[C@H](C(=O)O)[C@H]([C@@H]([C@H]2O)O)O)cc(c2c1oc(cc2=O)c1ccccc1)O	P35030	1
Isoangustone A	Isoflavones	3-[3,4-dihydroxy-5-(3-methylbut-2-enyl)phenyl]-5,7-dihydroxy-6-(3-methylbut-2-enyl)chromen-4-one	C25H26O6	QNLGNISMYMFVHP-UHFFFAOYSA-N	InChI=1S/C25H26O6/c1-13(2)5-7-15-9-16(10-20(27)23(15)28)18-12-31-21-11-19(26)17(8-6-14(3)4)24(29)22(21)25(18)30/h5-6,9-12,26-29H,7-8H2,1-4H3	CC(=CCc1cc(cc(c1O)O)c1coc2c(c1=O)c(O)c(c(c2)O)CC=C(C)C)C	P18031	1
Syringetin	Flavonols	3,5,7-trihydroxy-2-(4-hydroxy-3,5-dimethoxyphenyl)chromen-4-one	C17H14O8	UZMAPBJVXOGOFT-UHFFFAOYSA-N	InChI=1S/C17H14O8/c1-23-11-3-7(4-12(24-2)14(11)20)17-16(22)15(21)13-9(19)5-8(18)6-10(13)25-17/h3-6,18-20,22H,1-2H3	COc1cc(cc(c1O)OC)c1oc2cc(O)cc(c2c(=O)c1O)O	P06239,P37231	2
Pectolinarin	Flavones	5-hydroxy-6-methoxy-2-(4-methoxyphenyl)-7-[(2S,3R,4S,5S,6R)-3,4,5-trihydroxy-6-[[(2R,3R,4R,5R,6S)-3,4,5-trihydroxy-6-methyloxan-2-yl]oxymethyl]oxan-2-yl]oxychromen-4-one	C29H34O15	DUXQKCCELUKXOE-CBBZIXHGSA-N	InChI=1S/C29H34O15/c1-11-20(31)23(34)25(36)28(41-11)40-10-18-21(32)24(35)26(37)29(44-18)43-17-9-16-19(22(33)27(17)39-3)14(30)8-15(42-16)12-4-6-13(38-2)7-5-12/h4-9,11,18,20-21,23-26,28-29,31-37H,10H2,1-3H3/t11-,18+,20-,21+,23+,24-,25+,26+,28+,29+/m0/s1	COc1c(O[C@@H]2O[C@H](CO[C@@H]3O[C@@H](C)[C@@H]([C@H]([C@H]3O)O)O)[C@H]([C@@H]([C@H]2O)O)O)cc2c(c1O)c(=O)cc(o2)c1ccc(cc1)OC	Q9NPD5,Q9Y6L6	2
5-Hydroxy-3-[(Z)-4-Hydroxy-3-Methylbut-2-Enyl]-8,8-Dimethyl-2-(2,4,5-Trihydroxyphenyl)Pyrano[2,3-H]Chromen-4-One	Flavones	5-hydroxy-3-[(Z)-4-hydroxy-3-methylbut-2-enyl]-8,8-dimethyl-2-(2,4,5-trihydroxyphenyl)pyrano[2,3-h]chromen-4-one	C25H24O8	UTYRRYOOGHLXNT-QCDXTXTGSA-N	InChI=1S/C25H24O8/c1-12(11-26)4-5-14-22(31)21-19(30)10-20-13(6-7-25(2,3)33-20)24(21)32-23(14)15-8-17(28)18(29)9-16(15)27/h4,6-10,26-30H,5,11H2,1-3H3/b12-4-	OC/C(=CCc1c(oc2c(c1=O)c(O)cc1c2C=CC(O1)(C)C)c1cc(O)c(cc1O)O)/C	Q9UNQ0	1
Formonetin	Isoflavones	6,7-dihydroxy-3-(4-methoxyphenyl)chromen-4-one	C16H12O5	GCWOYVFHJDNKIN-UHFFFAOYSA-N	InChI=1S/C16H12O5/c1-20-10-4-2-9(3-5-10)12-8-21-15-7-14(18)13(17)6-11(15)16(12)19/h2-8,17-18H,1H3	COc1ccc(cc1)c1coc2c(c1=O)cc(c(c2)O)O	P18054	1
Apiin	Flavones	7-[(2S,3R,4S,5S,6R)-3-[(2S,3R,4R)-3,4-dihydroxy-4-(hydroxymethyl)oxolan-2-yl]oxy-4,5-dihydroxy-6-(hydroxymethyl)oxan-2-yl]oxy-5-hydroxy-2-(4-hydroxyphenyl)chromen-4-one	C26H28O14	NTDLXWMIWOECHG-YRCFQSNFSA-N	InChI=1S/C26H28O14/c27-8-18-20(32)21(33)22(40-25-23(34)26(35,9-28)10-36-25)24(39-18)37-13-5-14(30)19-15(31)7-16(38-17(19)6-13)11-1-3-12(29)4-2-11/h1-7,18,20-25,27-30,32-35H,8-10H2/t18-,20-,21+,22-,23+,24-,25+,26-/m1/s1	OC[C@H]1O[C@@H](Oc2cc(O)c3c(c2)oc(cc3=O)c2ccc(cc2)O)[C@@H]([C@H]([C@@H]1O)O)O[C@@H]1OC[C@]([C@H]1O)(O)CO	Q03164,Q9NPD5,O75496,Q9Y6L6,Q9UIF8	5
Ohioensin C	Others	</td></tr>\r\n\t\t\t\t<tr><td align=right><b>Synonyms: &nbsp</b>	C24H18O5	ZVFNSNHXUYAPTP-VVTWNTARSA-N	InChI=1S/C24H18O5/c1-28-18-10-16(27)21-15(26)9-13-11-5-2-3-8-17(11)29-24-12-6-4-7-14(25)19(12)22(18)23(21)20(13)24/h2-8,10,13,20,24-25,27H,9H2,1H3/t13-,20+,24+/m1/s1	COc1cc(O)c2c3c1c1c(O)cccc1[C@H]1[C@H]3[C@H](CC2=O)c2c(O1)cccc2	P18031	1
Ebenfuran Ii	Others	2-(2,4-dihydroxyphenyl)-4-hydroxy-6-methoxy-1-benzofuran-3-carbaldehyde	C16H12O6	MYAHOBWCBIQQLV-UHFFFAOYSA-N	InChI=1S/C16H12O6/c1-21-9-5-13(20)15-11(7-17)16(22-14(15)6-9)10-3-2-8(18)4-12(10)19/h2-7,18-20H,1H3	COc1cc(O)c2c(c1)oc(c2C=O)c1ccc(cc1O)O	P03372	1
Abyssinoflavanone Vii	Flavanones	(2S)-5,7-dihydroxy-2-[4-hydroxy-3-(2-hydroxy-3-methylbut-3-enyl)-5-(3-methylbut-2-enyl)phenyl]-2,3-dihydrochromen-4-one	C25H28O6	FZUJHUDJFJCWMT-BPARTEKVSA-N	InChI=1S/C25H28O6/c1-13(2)5-6-15-7-16(8-17(25(15)30)9-19(27)14(3)4)22-12-21(29)24-20(28)10-18(26)11-23(24)31-22/h5,7-8,10-11,19,22,26-28,30H,3,6,9,12H2,1-2,4H3/t19?,22-/m0/s1	CC(=CCc1cc(cc(c1O)CC(C(=C)C)O)[C@@H]1CC(=O)c2c(O1)cc(cc2O)O)C	P18031	1
4-Methoxydalbergione	Others	2-methoxy-5-(1-phenylprop-2-enyl)cyclohexa-2,5-diene-1,4-dione	C16H14O3	RGSUZUQISVAJJF-UHFFFAOYSA-N	InChI=1S/C16H14O3/c1-3-12(11-7-5-4-6-8-11)13-9-15(18)16(19-2)10-14(13)17/h3-10,12H,1H2,2H3	COC1=CC(=O)C(=CC1=O)C(c1ccccc1)C=C	O94782,Q9NPD5,Q9Y6L6,Q9NUW8,P16050,P11473,P00352,Q99714,O75604,P10636,P15428,B2RXH2	12
3,9-Dihydroxy-4-Prenyl-[6Ar;11Ar]Pterocarpan	Others	(6aR,11aR)-4-(3-methylbut-2-enyl)-6a,11a-dihydro-6H-[1]benzofuro[3,2-c]chromene-3,9-diol	C20H20O4	QKYUTKLCEVEMIE-JXFKEZNVSA-N	InChI=1S/C20H20O4/c1-11(2)3-5-14-17(22)8-7-15-19(14)23-10-16-13-6-4-12(21)9-18(13)24-20(15)16/h3-4,6-9,16,20-22H,5,10H2,1-2H3/t16-,20-/m0/s1	CC(=CCc1c(O)ccc2c1OC[C@@H]1[C@H]2Oc2c1ccc(c2)O)C	P18031	1
5-Deoxyabyssinin Ii	Flavanones	(2S)-7-hydroxy-2-[4-hydroxy-3-methoxy-5-(3-methylbut-2-enyl)phenyl]-2,3-dihydrochromen-4-one	C21H22O5	GZTDFKLABHOHBU-SFHVURJKSA-N	InChI=1S/C21H22O5/c1-12(2)4-5-13-8-14(9-20(25-3)21(13)24)18-11-17(23)16-7-6-15(22)10-19(16)26-18/h4,6-10,18,22,24H,5,11H2,1-3H3/t18-/m0/s1	COc1cc(cc(c1O)CC=C(C)C)[C@@H]1CC(=O)c2c(O1)cc(cc2)O	P18031	1
Myricitrin	Flavonols	5,7-dihydroxy-3-[(2S,3R,4R,5R,6S)-3,4,5-trihydroxy-6-methyloxan-2-yl]oxy-2-(3,4,5-trihydroxyphenyl)chromen-4-one	C21H20O12	DCYOADKBABEMIQ-OWMUPTOHSA-N	InChI=1S/C21H20O12/c1-6-14(26)17(29)18(30)21(31-6)33-20-16(28)13-9(23)4-8(22)5-12(13)32-19(20)7-2-10(24)15(27)11(25)3-7/h2-6,14,17-18,21-27,29-30H,1H3/t6-,14-,17+,18+,21-/m0/s1	Oc1cc(O)c2c(c1)oc(c(c2=O)O[C@@H]1O[C@@H](C)[C@@H]([C@H]([C@H]1O)O)O)c1cc(O)c(c(c1)O)O	P27695,P06746,Q9NUW8,P83916,P53350,P39748,P00352,Q9UIF8,P46063,O95398,Q9UNA4,Q9NR56,Q9Y253,Q99700,Q9UBT6,P10636,P34949,P07237,Q96KQ7,B2RXH2,P10253	21
Sophorapterocarpan A	Others	(6aR,11aR)-8-(3-methylbut-2-enyl)-6a,11a-dihydro-6H-[1]benzofuro[3,2-c]chromene-3,9-diol	C20H20O4	AZLNYSCXKUKIRV-JXFKEZNVSA-N	InChI=1S/C20H20O4/c1-11(2)3-4-12-7-15-16-10-23-18-8-13(21)5-6-14(18)20(16)24-19(15)9-17(12)22/h3,5-9,16,20-22H,4,10H2,1-2H3/t16-,20-/m0/s1	CC(=CCc1cc2c(cc1O)O[C@@H]1[C@H]2COc2c1ccc(c2)O)C	P18031	1
Wistin	Isoflavones	6-methoxy-3-(4-methoxyphenyl)-7-[(2S,3R,4S,5S,6R)-3,4,5-trihydroxy-6-(hydroxymethyl)oxan-2-yl]oxychromen-4-one	C23H24O10	YLYJXNTZVUEFJZ-DODNOZFWSA-N	InChI=1S/C23H24O10/c1-29-12-5-3-11(4-6-12)14-10-31-15-8-17(16(30-2)7-13(15)19(14)25)32-23-22(28)21(27)20(26)18(9-24)33-23/h3-8,10,18,20-24,26-28H,9H2,1-2H3/t18-,20-,21+,22-,23-/m1/s1	OC[C@H]1O[C@@H](Oc2cc3occ(c(=O)c3cc2OC)c2ccc(cc2)OC)[C@@H]([C@H]([C@@H]1O)O)O	P04637,Q96QE3	2
b"3-O-Methyldiplacol"	Flavanonol	(2R,3R)-6-[(2E)-3,7-dimethylocta-2,6-dienyl]-3,5,7-trihydroxy-2-(4-hydroxy-3-methoxyphenyl)-2,3-dihydrochromen-4-one	C26H30O7	YHOYRZLJSAAOGW-WFQOKMFZSA-N	InChI=1S/C26H30O7/c1-14(2)6-5-7-15(3)8-10-17-19(28)13-21-22(23(17)29)24(30)25(31)26(33-21)16-9-11-18(27)20(12-16)32-4/h6,8-9,11-13,25-29,31H,5,7,10H2,1-4H3/b15-8+/t25-,26+/m0/s1	COc1cc(ccc1O)[C@H]1Oc2cc(O)c(c(c2C(=O)[C@@H]1O)O)C/C=C(/CCC=C(C)C)C	P22303	1
Erysubin E	Others	</td></tr>\r\n\t\t\t\t<tr><td align=right><b>Synonyms: &nbsp</b>	C25H26O5	CMHGFGMNRHHGSN-UKILVPOCSA-N	InChI=1S/C25H26O5/c1-14(2)5-6-15-11-17-21(12-19(15)26)28-13-25(27)18-7-8-20-16(22(18)29-23(17)25)9-10-24(3,4)30-20/h5,7-12,23,26-27H,6,13H2,1-4H3/t23-,25+/m0/s1	CC(=CCc1cc2c(cc1O)OC[C@@]1([C@H]2Oc2c1ccc1c2C=CC(O1)(C)C)O)C	P18031	1
Deguelin	Others	</td></tr>\r\n\t\t\t\t<tr><td align=right><b>Synonyms: &nbsp</b>	C23H22O6	ORDAZKGHSNRHTD-UXHICEINSA-N	InChI=1S/C23H22O6/c1-23(2)8-7-12-15(29-23)6-5-13-21(24)20-14-9-17(25-3)18(26-4)10-16(14)27-11-19(20)28-22(12)13/h5-10,19-20H,11H2,1-4H3/t19-,20+/m1/s1	COc1cc2c(cc1OC)OC[C@@H]1[C@H]2C(=O)c2c(O1)c1C=CC(Oc1cc2)(C)C	P27695,O94782,Q9NPD5,Q9Y6L6,P33261,Q16665,P04637,Q9HC16,P16473,P10635,P10636,P08684	12
Podocarpusflavone A	Flavones	8-[5-(5,7-dihydroxy-4-oxochromen-2-yl)-2-hydroxyphenyl]-5,7-dihydroxy-2-(4-methoxyphenyl)chromen-4-one	C31H20O10	RBTRUVNXLDXHBJ-UHFFFAOYSA-N	InChI=1S/C31H20O10/c1-39-17-5-2-14(3-6-17)25-13-24(38)30-22(36)11-21(35)28(31(30)41-25)18-8-15(4-7-19(18)33)26-12-23(37)29-20(34)9-16(32)10-27(29)40-26/h2-13,32-36H,1H3	COc1ccc(cc1)c1cc(=O)c2c(o1)c(c(cc2O)O)c1cc(ccc1O)c1cc(=O)c2c(o1)cc(cc2O)O	P43235,P56817	2
Genistin	Isoflavones	5-hydroxy-3-(4-hydroxyphenyl)-7-[(2S,3R,4S,5S,6R)-3,4,5-trihydroxy-6-(hydroxymethyl)oxan-2-yl]oxychromen-4-one	C21H20O10	ZCOLJUOHXJRHDI-CMWLGVBASA-N	InChI=1S/C21H20O10/c22-7-15-18(26)19(27)20(28)21(31-15)30-11-5-13(24)16-14(6-11)29-8-12(17(16)25)9-1-3-10(23)4-2-9/h1-6,8,15,18-24,26-28H,7H2/t15-,18-,19+,20-,21-/m1/s1	OC[C@H]1O[C@@H](Oc2cc(O)c3c(c2)occ(c3=O)c2ccc(cc2)O)[C@@H]([C@H]([C@@H]1O)O)O	P00533	1
Gardenin	Flavones	5-hydroxy-6,7,8-trimethoxy-2-(4-methoxyphenyl)chromen-4-one	C19H18O7	LXEVSYZNYDZSOB-UHFFFAOYSA-N	InChI=1S/C19H18O7/c1-22-11-7-5-10(6-8-11)13-9-12(20)14-15(21)17(23-2)19(25-4)18(24-3)16(14)26-13/h5-9,21H,1-4H3	COc1ccc(cc1)c1cc(=O)c2c(o1)c(OC)c(c(c2O)OC)OC	P15559,P84022,P00352,O75496,P63092,P28482	6
n.a.	Flavan-3-ols	</td></tr>\r\n\t\t\t\t<tr><td align=right><b>Synonyms: &nbsp</b>	C75H62O30	QRFZGLTZLZZHCM-NWYMYRDLSA-N	InChI=1S/C75H62O30/c76-28-16-41(88)51-50(17-28)101-68(24-2-7-31(78)37(84)12-24)63(97)59(51)53-43(90)20-45(92)55-61(65(99)70(103-73(53)55)26-4-9-33(80)39(86)14-26)57-47(94)22-48(95)58-62(66(100)71(105-75(57)58)27-5-10-34(81)40(87)15-27)56-46(93)21-44(91)54-60(64(98)69(104-74(54)56)25-3-8-32(79)38(85)13-25)52-42(89)19-35(82)29-18-49(96)67(102-72(29)52)23-1-6-30(77)36(83)11-23/h1-17,19-22,49,59-71,7…	Oc1cc(O)c2c(c1)O[C@@H]([C@@H]([C@H]2c1c(O)cc(c2c1O[C@H](c1ccc(c(c1)O)O)[C@@H]([C@H]2c1c(O)cc(c2c1O[C@H](c1ccc(c(c1)O)O)[C@@H]([C@H]2c1c(O)cc(c2c1O[C@H](c1ccc(c(c1)O)O)[C@@H]([C@H]2c1c(O)cc(c2c1O[C@@H]([C@@H](C2)O)c1ccc(c(c1)O)O)O)O)O)O)O)O)O)O)c1ccc(c(c1)O)O	P08253,P14780	2
Dihydrokaempferol	Flavanonol	(2R,3R)-3,5,7-trihydroxy-2-(4-hydroxyphenyl)-2,3-dihydrochromen-4-one	C15H12O6	PADQINQHPQKXNL-LSDHHAIUSA-N	InChI=1S/C15H12O6/c16-8-3-1-7(2-4-8)15-14(20)13(19)12-10(18)5-9(17)6-11(12)21-15/h1-6,14-18,20H/t14-,15+/m0/s1	Oc1ccc(cc1)[C@H]1Oc2cc(O)cc(c2C(=O)[C@@H]1O)O	P83916,P11511,O75496,P36888	4
Nicotifloroside	Flavonols	5,7-dihydroxy-2-(4-hydroxyphenyl)-3-[(2S,3R,4S,5S,6R)-3,4,5-trihydroxy-6-[[(2R,3R,4R,5R,6S)-3,4,5-trihydroxy-6-methyloxan-2-yl]oxymethyl]oxan-2-yl]oxychromen-4-one	C27H30O15	RTATXGUCZHCSNG-QHWHWDPRSA-N	InChI=1S/C27H30O15/c1-9-17(31)20(34)22(36)26(39-9)38-8-15-18(32)21(35)23(37)27(41-15)42-25-19(33)16-13(30)6-12(29)7-14(16)40-24(25)10-2-4-11(28)5-3-10/h2-7,9,15,17-18,20-23,26-32,34-37H,8H2,1H3/t9-,15+,17-,18+,20+,21-,22+,23+,26+,27-/m0/s1	Oc1ccc(cc1)c1oc2cc(O)cc(c2c(=O)c1O[C@@H]1O[C@H](CO[C@@H]2O[C@@H](C)[C@@H]([C@H]([C@H]2O)O)O)[C@H]([C@@H]([C@H]1O)O)O)O	P47989	1
Ourateaproanthocyanidin A	Flavan-3-ols	(2R,3R)-2-(3,5-dihydroxy-4-methoxyphenyl)-8-[(2R,3R,4R)-3,5,7-trihydroxy-2-(4-hydroxyphenyl)-3,4-dihydro-2H-chromen-4-yl]-3,4-dihydro-2H-chromene-3,5,7-triol	C31H28O12	JPFCOVZKLAXXOE-NFJBMHMQSA-N	InChI=1S/C31H28O12/c1-41-31-20(37)6-13(7-21(31)38)28-22(39)10-16-17(34)11-19(36)25(30(16)43-28)26-24-18(35)8-15(33)9-23(24)42-29(27(26)40)12-2-4-14(32)5-3-12/h2-9,11,22,26-29,32-40H,10H2,1H3/t22-,26-,27-,28-,29-/m1/s1	COc1c(O)cc(cc1O)[C@H]1Oc2c(C[C@H]1O)c(O)cc(c2[C@@H]1[C@@H](O)[C@H](Oc2c1c(O)cc(c2)O)c1ccc(cc1)O)O	P35354,P23219	2
Sequoiaflavone	Flavones	5,7-dihydroxy-8-[2-hydroxy-5-(5-hydroxy-7-methoxy-4-oxochromen-2-yl)phenyl]-2-(4-hydroxyphenyl)chromen-4-one	C31H20O10	TYUMAYSMJLPFAN-UHFFFAOYSA-N	InChI=1S/C31H20O10/c1-39-17-9-20(34)29-23(37)12-26(40-27(29)10-17)15-4-7-19(33)18(8-15)28-21(35)11-22(36)30-24(38)13-25(41-31(28)30)14-2-5-16(32)6-3-14/h2-13,32-36H,1H3	COc1cc(O)c2c(c1)oc(cc2=O)c1ccc(c(c1)c1c(O)cc(c2c1oc(cc2=O)c1ccc(cc1)O)O)O	P56817	1
3,5-Dihydroxy-2-(3-Hydroxy-4-Methoxyphenyl)-6,7-Dimethoxychromen-4-One	Flavonols	3,5-dihydroxy-2-(3-hydroxy-4-methoxyphenyl)-6,7-dimethoxychromen-4-one	C18H16O8	ZZEQOHMDRQUMMH-UHFFFAOYSA-N	InChI=1S/C18H16O8/c1-23-10-5-4-8(6-9(10)19)17-16(22)14(20)13-11(26-17)7-12(24-2)18(25-3)15(13)21/h4-7,19,21-22H,1-3H3	COc1cc2oc(c3ccc(c(c3)O)OC)c(c(=O)c2c(c1OC)O)O	Q9BUF5	1
b"4,7,8-Trihydroxyisoflavone"	Isoflavones	7,8-dihydroxy-3-(4-hydroxyphenyl)chromen-4-one	C15H10O5	BMZFZTMWBCFKSS-UHFFFAOYSA-N	InChI=1S/C15H10O5/c16-9-3-1-8(2-4-9)11-7-20-15-10(13(11)18)5-6-12(17)14(15)19/h1-7,16-17,19H	Oc1ccc(cc1)c1coc2c(c1=O)ccc(c2O)O	Q16875,P47989	2
(+/-)-Millewanin H	Isoflavones	3-(3,4-dihydroxyphenyl)-5,7-dihydroxy-8-(2-hydroxy-3-methylbut-3-enyl)-6-(3-methylbut-2-enyl)chromen-4-one	C25H26O7	RZHIZFURFGRHHQ-UHFFFAOYSA-N	InChI=1S/C25H26O7/c1-12(2)5-7-15-22(29)16(10-19(27)13(3)4)25-21(23(15)30)24(31)17(11-32-25)14-6-8-18(26)20(28)9-14/h5-6,8-9,11,19,26-30H,3,7,10H2,1-2,4H3	CC(=CCc1c(O)c(CC(C(=C)C)O)c2c(c1O)c(=O)c(co2)c1ccc(c(c1)O)O)C	P03372	1
Licocoumarone	Others	4-[6-hydroxy-4-methoxy-5-(3-methylbut-2-enyl)-1-benzofuran-2-yl]benzene-1,3-diol	C20H20O5	CNPMAFLUEHEXRE-UHFFFAOYSA-N	InChI=1S/C20H20O5/c1-11(2)4-6-14-17(23)10-19-15(20(14)24-3)9-18(25-19)13-7-5-12(21)8-16(13)22/h4-5,7-10,21-23H,6H2,1-3H3	COc1c(CC=C(C)C)c(O)cc2c1cc(o2)c1ccc(cc1O)O	P18031	1
b"Luteolin-4glucoside"	Flavones	5,7-dihydroxy-2-[3-hydroxy-4-[(2S,3R,4S,5S,6R)-3,4,5-trihydroxy-6-(hydroxymethyl)oxan-2-yl]oxyphenyl]chromen-4-one	C21H20O11	UHNXUSWGOJMEFO-QNDFHXLGSA-N	InChI=1S/C21H20O11/c22-7-16-18(27)19(28)20(29)21(32-16)31-13-2-1-8(3-10(13)24)14-6-12(26)17-11(25)4-9(23)5-15(17)30-14/h1-6,16,18-25,27-29H,7H2/t16-,18-,19+,20-,21-/m1/s1	OC[C@H]1O[C@@H](Oc2ccc(cc2O)c2cc(=O)c3c(o2)cc(cc3O)O)[C@@H]([C@H]([C@@H]1O)O)O	P00747	1
(2S)-Abyssinone Ii	Flavanones	5,7-dihydroxy-2-[4-hydroxy-3-(3-methylbut-2-enyl)phenyl]-2,3-dihydrochromen-4-one	C20H20O5	CGKWSLSAYABZTL-UHFFFAOYSA-N	InChI=1S/C20H20O5/c1-11(2)3-4-12-7-13(5-6-15(12)22)18-10-17(24)20-16(23)8-14(21)9-19(20)25-18/h3,5-9,18,21-23H,4,10H2,1-2H3	CC(=CCc1cc(ccc1O)C1CC(=O)c2c(O1)cc(cc2O)O)C	P11511	1
Sciadopitisin	Flavones	5,7-dihydroxy-8-[5-(5-hydroxy-7-methoxy-4-oxochromen-2-yl)-2-methoxyphenyl]-2-(4-methoxyphenyl)chromen-4-one	C33H24O10	YCXRBCHEOFVYEN-UHFFFAOYSA-N	InChI=1S/C33H24O10/c1-39-18-7-4-16(5-8-18)27-15-25(38)32-23(36)13-22(35)30(33(32)43-27)20-10-17(6-9-26(20)41-3)28-14-24(37)31-21(34)11-19(40-2)12-29(31)42-28/h4-15,34-36H,1-3H3	COc1ccc(cc1)c1cc(=O)c2c(o1)c(c(cc2O)O)c1cc(ccc1OC)c1cc(=O)c2c(o1)cc(cc2O)OC	Q03164,P56817	2
(2R)-5,7-Dihydroxy-2-(3-Hydroxy-4-Methoxyphenyl)-2,3-Dihydrochromen-4-One	Flavanones	(2R)-5,7-dihydroxy-2-(3-hydroxy-4-methoxyphenyl)-2,3-dihydrochromen-4-one	C16H14O6	AIONOLUJZLIMTK-CQSZACIVSA-N	InChI=1S/C16H14O6/c1-21-13-3-2-8(4-10(13)18)14-7-12(20)16-11(19)5-9(17)6-15(16)22-14/h2-6,14,17-19H,7H2,1H3/t14-/m1/s1	COc1ccc(cc1O)[C@H]1CC(=O)c2c(O1)cc(cc2O)O	P14618,O75496,Q9UNA4,Q96QE3,O75874	5
b"3,4-Dimethoxyflavone"	Flavones	2-(3,4-dimethoxyphenyl)chromen-4-one	C17H14O4	ZGHORMOOTZTQFL-UHFFFAOYSA-N	InChI=1S/C17H14O4/c1-19-15-8-7-11(9-17(15)20-2)16-10-13(18)12-5-3-4-6-14(12)21-16/h3-10H,1-2H3	COc1cc(ccc1OC)c1cc(=O)c2c(o1)cccc2	O94782,Q9NPD5,Q9Y6L6,Q16637,P06280,P00352,Q99714,P08183,P28482,P10828,Q03164,P08684,B2RXH2	13
5,7-Dihydroxy-6-Methoxy-2-Phenyl-2,3-Dihydrochromen-4-One	Flavanones	5,7-dihydroxy-6-methoxy-2-phenyl-2,3-dihydrochromen-4-one	C16H14O5	QUAPPCXFYKSDSV-UHFFFAOYSA-N	InChI=1S/C16H14O5/c1-20-16-11(18)8-13-14(15(16)19)10(17)7-12(21-13)9-5-3-2-4-6-9/h2-6,8,12,18-19H,7H2,1H3	COc1c(O)cc2c(c1O)C(=O)CC(O2)c1ccccc1	P27695,O15118,P51151,Q96QE3	4
Moracin N	Others	5-[6-hydroxy-5-(3-methylbut-2-enyl)-1-benzofuran-2-yl]benzene-1,3-diol	C19H18O4	WBSCSIABHGPAMC-UHFFFAOYSA-N	InChI=1S/C19H18O4/c1-11(2)3-4-12-5-13-8-18(23-19(13)10-17(12)22)14-6-15(20)9-16(21)7-14/h3,5-10,20-22H,4H2,1-2H3	CC(=CCc1cc2cc(oc2cc1O)c1cc(O)cc(c1)O)C	P11511	1
Cycloaltilisin 7	Flavanones	5-hydroxy-2-(4-hydroxyphenyl)-8-methyl-8-(4-methylpent-3-enyl)-2,3-dihydropyrano[2,3-h]chromen-4-one	C25H26O5	VSBUTPUUSVOZDI-UHFFFAOYSA-N	InChI=1S/C25H26O5/c1-15(2)5-4-11-25(3)12-10-18-22(30-25)14-20(28)23-19(27)13-21(29-24(18)23)16-6-8-17(26)9-7-16/h5-10,12,14,21,26,28H,4,11,13H2,1-3H3	CC(=CCCC1(C)C=Cc2c(O1)cc(c1c2OC(CC1=O)c1ccc(cc1)O)O)C	P43235	1
Podoverine A	Flavonols	2-[3,4-dihydroxy-2-(3-methylbut-2-enyl)phenyl]-5,7-dihydroxy-3-methoxychromen-4-one	C21H20O7	MGFXFQXRHGAKQN-UHFFFAOYSA-N	InChI=1S/C21H20O7/c1-10(2)4-5-12-13(6-7-14(23)18(12)25)20-21(27-3)19(26)17-15(24)8-11(22)9-16(17)28-20/h4,6-9,22-25H,5H2,1-3H3	COc1c(oc2c(c1=O)c(O)cc(c2)O)c1ccc(c(c1CC=C(C)C)O)O	Q9BUF5	1
7-Demethoxyegonol-9(Z),12(Z)Linoleate	Others	3-[2-(1,3-benzodioxol-5-yl)-1-benzofuran-5-yl]propyl (9Z,12Z)-octadeca-9,12-dienoate	C36H46O5	AABHSZUTAUSICN-HZJYTTRNSA-N	InChI=1S/C36H46O5/c1-2-3-4-5-6-7-8-9-10-11-12-13-14-15-16-19-36(37)38-24-17-18-29-20-22-32-31(25-29)27-34(41-32)30-21-23-33-35(26-30)40-28-39-33/h6-7,9-10,20-23,25-27H,2-5,8,11-19,24,28H2,1H3/b7-6-,10-9-	CCCCC/C=CC/C=CCCCCCCCC(=O)OCCCc1ccc2c(c1)cc(o2)c1ccc2c(c1)OCO2	P22303	1
Luteolin	Flavones	2-(3,4-dihydroxyphenyl)-5,7-dihydroxychromen-4-one	C15H10O6	IQPNAANSBPBGFQ-UHFFFAOYSA-N	InChI=1S/C15H10O6/c16-8-4-11(19)15-12(20)6-13(21-14(15)5-8)7-1-2-9(17)10(18)3-7/h1-6,16-19H	Oc1cc(O)c2c(c1)oc(cc2=O)c1ccc(c(c1)O)O	P09874,P14780,P06746,P43166,P47989,P24941,P16050,Q07817,P02545,P49841,Q9H2K2,P10636,O95271,P27695,P11387,P06276,P33261,Q16665,P23219,P05067,P16473,O95067,O75496,Q9UIF8,P04745,P54132,P22748,P10828,P11388,O75874,Q03164,P00918,P05177,P08253,Q16236,P39900,Q9UNA4,P15121,P00747,P35354,P51570,Q9HC97,Q9NUW8,P27338,P36888,P22303,Q9NPH5,P21397,P04798,Q9Y3R4,P11309,Q04760,Q14191,Q16678,P10253,P10415,P06280,…	74
5-Hydroxy-2-(4-Hydroxy-3,5-Dimethoxyphenyl)-6,7-Dimethoxychromen-4-One	Flavones	5-hydroxy-2-(4-hydroxy-3,5-dimethoxyphenyl)-6,7-dimethoxychromen-4-one	C19H18O8	XEHLDSAKZSXOFK-UHFFFAOYSA-N	InChI=1S/C19H18O8/c1-23-13-5-9(6-14(24-2)17(13)21)11-7-10(20)16-12(27-11)8-15(25-3)19(26-4)18(16)22/h5-8,21-22H,1-4H3	COc1cc2oc(cc(=O)c2c(c1OC)O)c1cc(OC)c(c(c1)OC)O	Q14191,B2RXH2,P06746,Q13526,Q03431,P46063,Q9UNA4,Q9NR56,Q9Y253,Q96QE3,O75874	11
1-[2,6-Dihydroxy-4-[(2S,3R,4S,5S,6R)-3,4,5-Trihydroxy-6-(Hydroxymethyl)Oxan-2-Yl]Oxyphenyl]-3-(4-Hydroxyphenyl)Propan-1-One	Others	1-[2,6-dihydroxy-4-[(2S,3R,4S,5S,6R)-3,4,5-trihydroxy-6-(hydroxymethyl)oxan-2-yl]oxyphenyl]-3-(4-hydroxyphenyl)propan-1-one	C21H24O10	GSTCPEBQYSOEHV-QNDFHXLGSA-N	InChI=1S/C21H24O10/c22-9-16-18(27)19(28)20(29)21(31-16)30-12-7-14(25)17(15(26)8-12)13(24)6-3-10-1-4-11(23)5-2-10/h1-2,4-5,7-8,16,18-23,25-29H,3,6,9H2/t16-,18-,19+,20-,21-/m1/s1	OC[C@H]1O[C@@H](Oc2cc(O)c(c(c2)O)C(=O)CCc2ccc(cc2)O)[C@@H]([C@H]([C@@H]1O)O)O	Q9HAS3	1
Karanjin	Flavonols	3-methoxy-2-phenylfuro[2,3-h]chromen-4-one	C18H12O4	LKPQNZRGGNOPPU-UHFFFAOYSA-N	InChI=1S/C18H12O4/c1-20-18-15(19)13-7-8-14-12(9-10-21-14)17(13)22-16(18)11-5-3-2-4-6-11/h2-10H,1H3	COc1c(oc2c(c1=O)ccc1c2cco1)c1ccccc1	Q9NPD5,Q8WZA2,Q9Y6L6,P33261,P83916,P16473,Q13526,Q99714,P10635,P63092,Q96QE3,P01215,P18031,P11712,Q9UBT6,P15428,P08684,P10636,Q16236,B2RXH2	20
n.a.	Flavan-3-ols	</td></tr>\r\n\t\t\t\t<tr><td align=right><b>Synonyms: &nbsp</b>	C30H24O12	NSEWTSAADLNHNH-UAFVEXHRSA-N	InChI=1S/C30H24O12/c31-13-7-20(37)24-22(8-13)41-30(12-2-4-16(33)19(36)6-12)29(39)26(24)25-23(42-30)10-17(34)14-9-21(38)27(40-28(14)25)11-1-3-15(32)18(35)5-11/h1-8,10,21,26-27,29,31-39H,9H2/t21-,26?,27-,29-,30+/m1/s1	Oc1cc(O)c2c(c1)O[C@@]1([C@@H](C2c2c(O1)cc(c1c2O[C@@H]([C@@H](C1)O)c1ccc(c(c1)O)O)O)O)c1ccc(c(c1)O)O	Q04759	1
Leachianone A	Flavanones	(2S)-5,7-dihydroxy-2-(4-hydroxy-2-methoxyphenyl)-8-[(2R)-5-methyl-2-prop-1-en-2-ylhex-4-enyl]-2,3-dihydrochromen-4-one	C26H30O6	YLTPWCZXKJSORQ-GYCJOSAFSA-N	InChI=1S/C26H30O6/c1-14(2)6-7-16(15(3)4)10-19-20(28)12-21(29)25-22(30)13-24(32-26(19)25)18-9-8-17(27)11-23(18)31-5/h6,8-9,11-12,16,24,27-29H,3,7,10,13H2,1-2,4-5H3/t16-,24+/m1/s1	COc1cc(O)ccc1[C@@H]1CC(=O)c2c(O1)c(C[C@H](C(=C)C)CC=C(C)C)c(cc2O)O	P56817	1
Kaempferol 3-O-Beta-D-Apiofuranosyl-7-O-Alpha-L-Rhamnopyranoside	Flavonols	3-[(2R,3S,4S)-3,4-dihydroxy-4-(hydroxymethyl)oxolan-2-yl]oxy-5-hydroxy-2-(4-hydroxyphenyl)-7-[(2S,3R,4R,5R,6S)-3,4,5-trihydroxy-6-methyloxan-2-yl]oxychromen-4-one	C26H28O14	SVQKJHRWPYLYKM-IFHXNFKFSA-N	InChI=1S/C26H28O14/c1-10-17(30)19(32)20(33)24(37-10)38-13-6-14(29)16-15(7-13)39-21(11-2-4-12(28)5-3-11)22(18(16)31)40-25-23(34)26(35,8-27)9-36-25/h2-7,10,17,19-20,23-25,27-30,32-35H,8-9H2,1H3/t10-,17-,19+,20+,23+,24-,25+,26-/m0/s1	OC[C@]1(O)CO[C@@H]([C@H]1O)Oc1c(oc2c(c1=O)c(O)cc(c2)O[C@@H]1O[C@@H](C)[C@@H]([C@H]([C@H]1O)O)O)c1ccc(cc1)O	P11388	1
b"(-)-Epicatechin 3-O-(3-O-Methyl)Gallate"	Flavan-3-ols	[(2R,3R)-2-(3,4-dihydroxyphenyl)-5,7-dihydroxy-3,4-dihydro-2H-chromen-3-yl] 3,4-dihydroxy-5-methoxybenzoate	C23H20O10	XGTBMCGGGJLOPS-IFMALSPDSA-N	InChI=1S/C23H20O10/c1-31-19-6-11(5-17(28)21(19)29)23(30)33-20-9-13-15(26)7-12(24)8-18(13)32-22(20)10-2-3-14(25)16(27)4-10/h2-8,20,22,24-29H,9H2,1H3/t20-,22-/m1/s1	COc1cc(cc(c1O)O)C(=O)O[C@@H]1Cc2c(O)cc(cc2O[C@@H]1c1ccc(c(c1)O)O)O	P50281,P08253,P09237	3
Licoricidin	Others	4-[(3R)-7-hydroxy-5-methoxy-6-(3-methylbut-2-enyl)-3,4-dihydro-2H-chromen-3-yl]-2-(3-methylbut-2-enyl)benzene-1,3-diol	C26H32O5	GBRZTUJCDFSIHM-KRWDZBQOSA-N	InChI=1S/C26H32O5/c1-15(2)6-8-19-22(27)11-10-18(25(19)29)17-12-21-24(31-14-17)13-23(28)20(26(21)30-5)9-7-16(3)4/h6-7,10-11,13,17,27-29H,8-9,12,14H2,1-5H3/t17-/m0/s1	COc1c2C[C@@H](COc2cc(c1CC=C(C)C)O)c1ccc(c(c1O)CC=C(C)C)O	P18031,P22303	2
Delphinidin	Others	2-(3,4,5-trihydroxyphenyl)chromenylium-3,5,7-triol	C15H10O7	JKHRCGUTYDNCLE-UHFFFAOYSA-O	InChI=1S/C15H10O7/c16-7-3-9(17)8-5-12(20)15(22-13(8)4-7)6-1-10(18)14(21)11(19)2-6/h1-5H,(H5-,16,17,18,19,20,21)/p+1	Oc1cc(O)c2c(c1)[o+]c(c(c2)O)c1cc(O)c(c(c1)O)O	P28907	1
Cinnamtannin D1	Flavan-3-ols	</td></tr>\r\n\t\t\t\t<tr><td align=right><b>Synonyms: &nbsp</b>	C45H36O18	BYSRPHRKESMCPO-HMQYECKYSA-N	InChI=1S/C45H36O18/c46-18-10-27(54)33-31(11-18)62-45(17-3-6-22(49)26(53)9-17)44(59)38(33)36-32(63-45)14-29(56)35-37(39(58)41(61-43(35)36)16-2-5-21(48)25(52)8-16)34-28(55)13-23(50)19-12-30(57)40(60-42(19)34)15-1-4-20(47)24(51)7-15/h1-11,13-14,30,37-41,44,46-59H,12H2/t30-,37-,38+,39+,40+,41+,44+,45-/m0/s1	Oc1cc(O)c2c(c1)O[C@@]1([C@@H]([C@H]2c2c(O1)cc(c1c2O[C@H](c2ccc(c(c2)O)O)[C@@H]([C@H]1c1c(O)cc(c2c1O[C@@H]([C@H](C2)O)c1ccc(c(c1)O)O)O)O)O)O)c1ccc(c(c1)O)O	P35354	1
(2S,3R)-2-(3,4-Dihydroxyphenyl)-8-[(2R,3S,4S)-2-(3,4-Dihydroxyphenyl)-3,5,7-Trihydroxy-3,4-Dihydro-2H-Chromen-4-Yl]-3,4-Dihydro-2H-Chromene-3,5,7-Triol	Flavan-3-ols	(2S,3R)-2-(3,4-dihydroxyphenyl)-8-[(2R,3S,4S)-2-(3,4-dihydroxyphenyl)-3,5,7-trihydroxy-3,4-dihydro-2H-chromen-4-yl]-3,4-dihydro-2H-chromene-3,5,7-triol	C30H26O12	XFZJEEAOWLFHDH-LEZVGZISSA-N	InChI=1S/C30H26O12/c31-13-7-20(37)24-23(8-13)41-29(12-2-4-16(33)19(36)6-12)27(40)26(24)25-21(38)10-17(34)14-9-22(39)28(42-30(14)25)11-1-3-15(32)18(35)5-11/h1-8,10,22,26-29,31-40H,9H2/t22-,26+,27+,28+,29-/m1/s1	Oc1cc(O)c2c(c1)O[C@@H]([C@H]([C@@H]2c1c(O)cc(c2c1O[C@H]([C@@H](C2)O)c1ccc(c(c1)O)O)O)O)c1ccc(c(c1)O)O	Q99714,P05177,P16050	3
Rutin	Flavonols	2-(3,4-dihydroxyphenyl)-5,7-dihydroxy-3-[(2S,3R,4S,5S,6R)-3,4,5-trihydroxy-6-[[(2R,3R,4R,5R,6S)-3,4,5-trihydroxy-6-methyloxan-2-yl]oxymethyl]oxan-2-yl]oxychromen-4-one	C27H30O16	IKGXIBQEEMLURG-NVPNHPEKSA-N	InChI=1S/C27H30O16/c1-8-17(32)20(35)22(37)26(40-8)39-7-15-18(33)21(36)23(38)27(42-15)43-25-19(34)16-13(31)5-10(28)6-14(16)41-24(25)9-2-3-11(29)12(30)4-9/h2-6,8,15,17-18,20-23,26-33,35-38H,7H2,1H3/t8-,15+,17-,18+,20+,21-,22+,23+,26+,27-/m0/s1	Oc1cc(O)c2c(c1)oc(c(c2=O)O[C@@H]1O[C@H](CO[C@@H]2O[C@@H](C)[C@@H]([C@H]([C@H]2O)O)O)[C@H]([C@@H]([C@H]1O)O)O)c1ccc(c(c1)O)O	P18825,P06746,P27487,P06276,P47989,P22303,Q9UNQ0,P48147,Q9GZQ4,P03372,P28482,P34913,Q9NR56,P08913,Q9UBT6,P35030,P10636,P08684,Q16236,Q96KQ7,P33527,B2RXH2,P10253	23
Sideroxylonal C	Others	(2R,3R,4R)-2-(3,5-diformyl-2,4,6-trihydroxyphenyl)-5,7-dihydroxy-4-(2-methylpropyl)-3-propan-2-yl-3,4-dihydro-2H-chromene-6,8-dicarbaldehyde	C26H28O10	PHQDMQGEKNBIPF-RAFFTOIBSA-N	InChI=1S/C26H28O10/c1-10(2)5-12-17(11(3)4)26(19-23(34)13(6-27)20(31)14(7-28)24(19)35)36-25-16(9-30)21(32)15(8-29)22(33)18(12)25/h6-12,17,26,31-35H,5H2,1-4H3/t12-,17-,26-/m1/s1	O=Cc1c2O[C@H]([C@@H]([C@H](c2c(c(c1O)C=O)O)CC(C)C)C(C)C)c1c(O)c(C=O)c(c(c1O)C=O)O	P05121	1
Abyssinones Iii	Flavanones	(2S)-2-[2,2-dimethyl-8-(3-methylbut-2-enyl)chromen-6-yl]-7-hydroxy-2,3-dihydrochromen-4-one	C25H26O4	BWSXMPVDLMJKKY-QFIPXVFZSA-N	InChI=1S/C25H26O4/c1-15(2)5-6-16-11-18(12-17-9-10-25(3,4)29-24(16)17)22-14-21(27)20-8-7-19(26)13-23(20)28-22/h5,7-13,22,26H,6,14H2,1-4H3/t22-/m0/s1	CC(=CCc1cc(cc2c1OC(C)(C)C=C2)[C@@H]1CC(=O)c2c(O1)cc(cc2)O)C	P18031	1
Vitexin	Flavones	5,7-dihydroxy-2-(4-hydroxyphenyl)-8-[(2S,3R,4R,5S,6R)-3,4,5-trihydroxy-6-(hydroxymethyl)oxan-2-yl]chromen-4-one	C21H20O10	SGEWCQFRYRRZDC-VPRICQMDSA-N	InChI=1S/C21H20O10/c22-7-14-17(27)18(28)19(29)21(31-14)16-11(25)5-10(24)15-12(26)6-13(30-20(15)16)8-1-3-9(23)4-2-8/h1-6,14,17-19,21-25,27-29H,7H2/t14-,17-,18+,19-,21+/m1/s1	OC[C@H]1O[C@H]([C@@H]([C@H]([C@@H]1O)O)O)c1c(O)cc(c2c1oc(cc2=O)c1ccc(cc1)O)O	P27695,P15121,Q13951,Q9UBT6	4
Erycrystagallin	Others	2,10-bis(3-methylbut-2-enyl)-6H-[1]benzofuro[3,2-c]chromene-3,9-diol	C25H26O4	VNTSSLCFFUCTNP-UHFFFAOYSA-N	InChI=1S/C25H26O4/c1-14(2)5-7-16-11-19-23(12-22(16)27)28-13-20-17-9-10-21(26)18(8-6-15(3)4)24(17)29-25(19)20/h5-6,9-12,26-27H,7-8,13H2,1-4H3	CC(=CCc1cc2c(cc1O)OCc1c2oc2c1ccc(c2CC=C(C)C)O)C	P04054	1
Zapotin	Flavones	2-(2,6-dimethoxyphenyl)-5,6-dimethoxychromen-4-one	C19H18O6	PBQMALAAFQMDSP-UHFFFAOYSA-N	InChI=1S/C19H18O6/c1-21-12-6-5-7-13(22-2)18(12)16-10-11(20)17-14(25-16)8-9-15(23-3)19(17)24-4/h5-10H,1-4H3	COc1cccc(c1c1cc(=O)c2c(o1)ccc(c2OC)OC)OC	P11926	1
5,7-Dihydroxy-6-Methyl-2-Phenylchromen-4-One	Flavones	5,7-dihydroxy-6-methyl-2-phenylchromen-4-one	C16H12O4	XRJWLVUOUWIPHW-UHFFFAOYSA-N	InChI=1S/C16H12O4/c1-9-11(17)7-14-15(16(9)19)12(18)8-13(20-14)10-5-3-2-4-6-10/h2-8,17,19H,1H3	Oc1cc2oc(cc(=O)c2c(c1C)O)c1ccccc1	P08183	1
Tetramethylkaempferol	Flavonols	3,5,7-trimethoxy-2-(4-methoxyphenyl)chromen-4-one	C19H18O6	YZWIIEJLESXODL-UHFFFAOYSA-N	InChI=1S/C19H18O6/c1-21-12-7-5-11(6-8-12)18-19(24-4)17(20)16-14(23-3)9-13(22-2)10-15(16)25-18/h5-10H,1-4H3	COc1ccc(cc1)c1oc2cc(OC)cc(c2c(=O)c1OC)OC	P0DMS8	1
Erybreadin	Others	</td></tr>\r\n\t\t\t\t<tr><td align=right><b>Synonyms: &nbsp</b>	C25H26O4	XDRMVDDOBVPELW-CYFREDJKSA-N	InChI=1S/C25H26O4/c1-14(2)5-6-16-20(26)9-7-18-22(16)27-13-19-15-8-10-21-17(23(15)28-24(18)19)11-12-25(3,4)29-21/h5,7-12,19,24,26H,6,13H2,1-4H3/t19-,24-/m0/s1	CC(=CCc1c(O)ccc2c1OC[C@@H]1[C@H]2Oc2c1ccc1c2C=CC(O1)(C)C)C	P18031	1
Gardenin	Flavones	5-hydroxy-6,7,8-trimethoxy-2-(3,4,5-trimethoxyphenyl)chromen-4-one	C21H22O9	MQBFFYQCZCKSBX-UHFFFAOYSA-N	InChI=1S/C21H22O9/c1-24-13-7-10(8-14(25-2)17(13)26-3)12-9-11(22)15-16(23)19(27-4)21(29-6)20(28-5)18(15)30-12/h7-9,23H,1-6H3	COc1c(OC)cc(cc1OC)c1cc(=O)c2c(o1)c(OC)c(c(c2O)OC)OC	Q9BUF5,P00352,P63092,Q96QE3,P08684,Q16236,P37840	7
4-[(3S)-8,8-Dimethyl-3,4-Dihydro-2H-Pyrano[2,3-F]Chromen-3-Yl]Benzene-1,3-Diol	Others	4-[(3S)-8,8-dimethyl-3,4-dihydro-2H-pyrano[2,3-f]chromen-3-yl]benzene-1,3-diol	C20H20O4	LBQIJVLKGVZRIW-CYBMUJFWSA-N	InChI=1S/C20H20O4/c1-20(2)8-7-16-18(24-20)6-3-12-9-13(11-23-19(12)16)15-5-4-14(21)10-17(15)22/h3-8,10,13,21-22H,9,11H2,1-2H3/t13-/m1/s1	Oc1ccc(c(c1)O)[C@H]1COc2c(C1)ccc1c2C=CC(O1)(C)C	P78536,P51151,P07900,P43220,P14735,O75164,O15118,P04637,P84022,O75496,Q13526,Q99700,Q96QE3,P37840	14
Pterocarpin	Others	</td></tr>\r\n\t\t\t\t<tr><td align=right><b>Synonyms: &nbsp</b>	C17H14O5	YLZYAUCOYZKLMA-SJCJKPOMSA-N	InChI=1S/C17H14O5/c1-18-9-2-3-10-13(4-9)19-7-12-11-5-15-16(21-8-20-15)6-14(11)22-17(10)12/h2-6,12,17H,7-8H2,1H3/t12-,17-/m0/s1	COc1ccc2c(c1)OC[C@@H]1[C@H]2Oc2c1cc1c(c2)OCO1	Q13951,P10636,P13866,Q9NUW8,P28482	5
Demethylmoracin I	Others	5-(6-hydroxy-1-benzofuran-2-yl)-4-(3-methylbut-2-enyl)benzene-1,3-diol	C19H18O4	KDDIWXQFRQYXCG-UHFFFAOYSA-N	InChI=1S/C19H18O4/c1-11(2)3-6-15-16(8-14(21)9-17(15)22)19-7-12-4-5-13(20)10-18(12)23-19/h3-5,7-10,20-22H,6H2,1-2H3	CC(=CCc1c(O)cc(cc1c1oc2c(c1)ccc(c2)O)O)C	P11511	1
(-)-Moracin O	Others	5-[(6R)-6-(2-hydroxypropan-2-yl)-5,6-dihydrofuro[3,2-f][1]benzofuran-2-yl]benzene-1,3-diol	C19H18O5	HMTMYIWMPJSCAZ-GOSISDBHSA-N	InChI=1S/C19H18O5/c1-19(2,22)18-7-11-3-10-6-15(23-16(10)9-17(11)24-18)12-4-13(20)8-14(21)5-12/h3-6,8-9,18,20-22H,7H2,1-2H3/t18-/m1/s1	Oc1cc(O)cc(c1)c1oc2c(c1)cc1c(c2)O[C@H](C1)C(O)(C)C	Q16665	1
Bonducellin	Others	(3E)-7-hydroxy-3-[(4-methoxyphenyl)methylidene]chromen-4-one	C17H14O4	DLQSYZMPSWHYMW-XYOKQWHBSA-N	InChI=1S/C17H14O4/c1-20-14-5-2-11(3-6-14)8-12-10-21-16-9-13(18)4-7-15(16)17(12)19/h2-9,18H,10H2,1H3/b12-8+	COc1ccc(cc1)/C=C/1COc2c(C1=O)ccc(c2)O	P21397,P10721,P12931,P11362,P27338,P35968	6
Kaempferol 3-O-Alpha-L-Arabinopyranosyl-7-O-Alpha-L-Rhamnopyranoside	Flavonols	5-hydroxy-2-(4-hydroxyphenyl)-7-[(2S,3R,4R,5R,6S)-3,4,5-trihydroxy-6-methyloxan-2-yl]oxy-3-[(2S,3R,4S,5S)-3,4,5-trihydroxyoxan-2-yl]oxychromen-4-one	C26H28O14	DQBVFTJNUYZVQL-CLFUFSEMSA-N	InChI=1S/C26H28O14/c1-9-17(30)20(33)22(35)26(37-9)38-12-6-13(28)16-15(7-12)39-23(10-2-4-11(27)5-3-10)24(19(16)32)40-25-21(34)18(31)14(29)8-36-25/h2-7,9,14,17-18,20-22,25-31,33-35H,8H2,1H3/t9-,14-,17-,18-,20+,21+,22+,25-,26-/m0/s1	Oc1ccc(cc1)c1oc2cc(O[C@@H]3O[C@@H](C)[C@@H]([C@H]([C@H]3O)O)O)cc(c2c(=O)c1O[C@@H]1OC[C@@H]([C@@H]([C@H]1O)O)O)O	P11388,P11387	2
b"7,7-Di-O-Methylamentoflavone"	Flavones	5-hydroxy-8-[2-hydroxy-5-(5-hydroxy-7-methoxy-4-oxochromen-2-yl)phenyl]-2-(4-hydroxyphenyl)-7-methoxychromen-4-one	C32H22O10	SVIMIMQAVRQGEK-UHFFFAOYSA-N	InChI=1S/C32H22O10/c1-39-18-10-21(35)30-22(36)12-26(41-28(30)11-18)16-5-8-20(34)19(9-16)29-27(40-2)14-24(38)31-23(37)13-25(42-32(29)31)15-3-6-17(33)7-4-15/h3-14,33-35,38H,1-2H3	COc1cc(O)c2c(c1c1cc(ccc1O)c1cc(=O)c3c(o1)cc(cc3O)OC)oc(cc2=O)c1ccc(cc1)O	P56817	1
(2S,3S)-2-(3,4,5-Trihydroxy-Phenyl)-Chroman-3,5,7-Triol	Flavan-3-ols	(2S,3S)-2-(3,4,5-trihydroxyphenyl)-3,4-dihydro-2H-chromene-3,5,7-triol	C15H14O7	XMOCLSLCDHWDHP-WFASDCNBSA-N	InChI=1S/C15H14O7/c16-7-3-9(17)8-5-12(20)15(22-13(8)4-7)6-1-10(18)14(21)11(19)2-6/h1-4,12,15-21H,5H2/t12-,15-/m0/s1	Oc1cc2O[C@@H](c3cc(O)c(c(c3)O)O)[C@H](Cc2c(c1)O)O	P56817	1
n.a.	Flavonols	</td></tr>\r\n\t\t\t\t<tr><td align=right><b>Synonyms: &nbsp</b>	C20H20O9	GGNGEESEARSAMF-UHFFFAOYSA-N	InChI=1S/C20H20O9/c1-24-12-6-9(7-13(25-2)19(12)27-4)17-20(28-5)16(23)14-11(29-17)8-10(21)18(26-3)15(14)22/h6-8,21-22H,1-5H3	COc1c(OC)cc(cc1OC)c1oc2cc(O)c(c(c2c(=O)c1OC)O)OC	Q9BUF5	1
Epicatechin Pentaacetate	Flavan-3-ols	[(2R,3R)-5,7-diacetyloxy-2-(3,4-diacetyloxyphenyl)-3,4-dihydro-2H-chromen-3-yl] acetate	C25H24O11	BKYWAYNSDFXIPL-JWQCQUIFSA-N	InChI=1S/C25H24O11/c1-12(26)31-18-9-21(33-14(3)28)19-11-24(35-16(5)30)25(36-22(19)10-18)17-6-7-20(32-13(2)27)23(8-17)34-15(4)29/h6-10,24-25H,11H2,1-5H3/t24-,25-/m1/s1	CC(=O)Oc1cc2O[C@H](c3ccc(c(c3)OC(=O)C)OC(=O)C)[C@@H](Cc2c(c1)OC(=O)C)OC(=O)C	Q9NPD5,Q9Y6L6	2
Iridin	Isoflavones	5-hydroxy-3-(3-hydroxy-4,5-dimethoxyphenyl)-6-methoxy-7-[(2S,3R,4S,5S,6R)-3,4,5-trihydroxy-6-(hydroxymethyl)oxan-2-yl]oxychromen-4-one	C24H26O13	LNQCUTNLHUQZLR-OZJWLQQPSA-N	InChI=1S/C24H26O13/c1-32-13-5-9(4-11(26)22(13)33-2)10-8-35-12-6-14(23(34-3)19(29)16(12)17(10)27)36-24-21(31)20(30)18(28)15(7-25)37-24/h4-6,8,15,18,20-21,24-26,28-31H,7H2,1-3H3/t15-,18-,20+,21-,24-/m1/s1	OC[C@H]1O[C@@H](Oc2cc3occ(c(=O)c3c(c2OC)O)c2cc(O)c(c(c2)OC)OC)[C@@H]([C@H]([C@@H]1O)O)O	Q9NPD5,Q9Y6L6	2
7-Methoxy-2-Methyl-3-Phenylchromen-4-One	Isoflavones	7-methoxy-2-methyl-3-phenylchromen-4-one	C17H14O3	XRGWZIGGCNSFRY-UHFFFAOYSA-N	InChI=1S/C17H14O3/c1-11-16(12-6-4-3-5-7-12)17(18)14-9-8-13(19-2)10-15(14)20-11/h3-10H,1-2H3	COc1ccc2c(c1)oc(c(c2=O)c1ccccc1)C	P00352,P05177,P04637,P33261,Q96QE3,P38398	6
(3R)-2-(3,5-Dihydroxy-4-Methoxyphenyl)-6-((E)-3,7-Dimethylocta-2,6-Dienyl)-3,5,7-Trihydroxychroman-4-One	Flavanonol	(3R)-2-(3,5-dihydroxy-4-methoxyphenyl)-6-[(2E)-3,7-dimethylocta-2,6-dienyl]-3,5,7-trihydroxy-2,3-dihydrochromen-4-one	C26H30O8	IZMSMYAPBBZFQP-IMTZNOAFSA-N	InChI=1S/C26H30O8/c1-13(2)6-5-7-14(3)8-9-16-17(27)12-20-21(22(16)30)23(31)24(32)25(34-20)15-10-18(28)26(33-4)19(29)11-15/h6,8,10-12,24-25,27-30,32H,5,7,9H2,1-4H3/b14-8+/t24-,25?/m0/s1	COc1c(O)cc(cc1O)C1Oc2cc(O)c(c(c2C(=O)[C@@H]1O)O)C/C=C(/CCC=C(C)C)C	P22303	1
(2E)-2-[(3,4-Dihydroxyphenyl)Methylidene]-6-Hydroxy-1-Benzofuran-3-One	Others	(2E)-2-[(3,4-dihydroxyphenyl)methylidene]-6-hydroxy-1-benzofuran-3-one	C15H10O5	RGNXWPVNPFAADO-MKMNVTDBSA-N	InChI=1S/C15H10O5/c16-9-2-3-10-13(7-9)20-14(15(10)19)6-8-1-4-11(17)12(18)5-8/h1-7,16-18H/b14-6+	Oc1ccc2c(c1)O/C(=C/c1ccc(c(c1)O)O)/C2=O	Q13951,Q03164,Q9UBT6,Q92830,P11473,P46063,P11021,P10828	8
Nevadensin	Flavones	5,7-dihydroxy-6,8-dimethoxy-2-(4-methoxyphenyl)chromen-4-one	C18H16O7	KRFBMPVGAYGGJE-UHFFFAOYSA-N	InChI=1S/C18H16O7/c1-22-10-6-4-9(5-7-10)12-8-11(19)13-14(20)17(23-2)15(21)18(24-3)16(13)25-12/h4-8,20-21H,1-3H3	COc1ccc(cc1)c1cc(=O)c2c(o1)c(OC)c(c(c2O)OC)O	P15559	1
Tricin	Flavones	5,7-dihydroxy-2-(4-hydroxy-3,5-dimethoxyphenyl)chromen-4-one	C17H14O7	HRGUSFBJBOKSML-UHFFFAOYSA-N	InChI=1S/C17H14O7/c1-22-14-3-8(4-15(23-2)17(14)21)12-7-11(20)16-10(19)5-9(18)6-13(16)24-12/h3-7,18-19,21H,1-2H3	COc1cc(cc(c1O)OC)c1cc(=O)c2c(o1)cc(cc2O)O	P15121	1
(6Ar,11Ar)-9-Methoxy-6A,11A-Dihydro-6H-[1]Benzofuro[3,2-C]Chromen-3-Ol	Others	(6aR,11aR)-9-methoxy-6a,11a-dihydro-6H-[1]benzofuro[3,2-c]chromen-3-ol	C16H14O4	NSRJSISNDPOJOP-BBRMVZONSA-N	InChI=1S/C16H14O4/c1-18-10-3-5-11-13-8-19-14-6-9(17)2-4-12(14)16(13)20-15(11)7-10/h2-7,13,16-17H,8H2,1H3/t13-,16-/m0/s1	COc1ccc2c(c1)O[C@@H]1[C@H]2COc2c1ccc(c2)O	O75496,Q16236	2
Lonicerin	Flavones	7-[(2S,3R,4S,5S,6R)-4,5-dihydroxy-6-(hydroxymethyl)-3-[(2S,3R,4R,5R,6S)-3,4,5-trihydroxy-6-methyloxan-2-yl]oxyoxan-2-yl]oxy-2-(3,4-dihydroxyphenyl)-5-hydroxychromen-4-one	C27H30O15	SHPPXMGVUDNKLV-KMFFXDMSSA-N	InChI=1S/C27H30O15/c1-9-20(33)22(35)24(37)26(38-9)42-25-23(36)21(34)18(8-28)41-27(25)39-11-5-14(31)19-15(32)7-16(40-17(19)6-11)10-2-3-12(29)13(30)4-10/h2-7,9,18,20-31,33-37H,8H2,1H3/t9-,18+,20-,21+,22+,23-,24+,25+,26-,27+/m0/s1	OC[C@H]1O[C@@H](Oc2cc(O)c3c(c2)oc(cc3=O)c2ccc(c(c2)O)O)[C@@H]([C@H]([C@@H]1O)O)O[C@@H]1O[C@@H](C)[C@@H]([C@H]([C@H]1O)O)O	P47989	1
5-Hydroxy-2-(4-Hydroxyphenyl)-7-Methoxy-2,3-Dihydrochromen-4-One	Flavanones	5-hydroxy-2-(4-hydroxyphenyl)-7-methoxy-2,3-dihydrochromen-4-one	C16H14O5	DJOJDHGQRNZXQQ-UHFFFAOYSA-N	InChI=1S/C16H14O5/c1-20-11-6-12(18)16-13(19)8-14(21-15(16)7-11)9-2-4-10(17)5-3-9/h2-7,14,17-18H,8H2,1H3	COc1cc2OC(CC(=O)c2c(c1)O)c1ccc(cc1)O	P04062,Q9NUW8,P0DMS8,P00352,O75496,Q13526,Q99700,Q9Y253,Q96QE3,Q13951,P10636	11
Cycloheterphyllin	Flavones	</td></tr>\r\n\t\t\t\t<tr><td align=right><b>Synonyms: &nbsp</b>	C30H30O7	ZZPIXEJZTXAVCX-UHFFFAOYSA-N	InChI=1S/C30H30O7/c1-14(2)7-8-17-27-16(9-10-30(5,6)37-27)25(33)24-26(34)23-22(11-15(3)4)35-21-13-20(32)19(31)12-18(21)29(23)36-28(17)24/h7,9-13,22,31-33H,8H2,1-6H3	CC(=CCc1c2OC(C)(C)C=Cc2c(c2c1oc1c3cc(O)c(cc3OC(c1c2=O)C=C(C)C)O)O)C	P83916,O75164,O75496,Q16236,Q03431,P17405	6
Theaflavin Digallate	Flavan-3-ols	[(2R,3R)-2-[1-[(2R,3R)-5,7-dihydroxy-3-(3,4,5-trihydroxybenzoyl)oxy-3,4-dihydro-2H-chromen-2-yl]-3,4,5-trihydroxy-6-oxobenzo[7]annulen-8-yl]-5,7-dihydroxy-3,4-dihydro-2H-chromen-3-yl] 3,4,5-trihydroxybenzoate	C43H32O20	ZEASWHWETFMWCV-ISBUVJFSSA-N	InChI=1S/C43H32O20/c44-17-7-23(46)21-12-33(62-42(58)15-3-25(48)36(54)26(49)4-15)40(60-31(21)9-17)14-1-19-20(11-30(53)39(57)35(19)38(56)29(52)2-14)41-34(13-22-24(47)8-18(45)10-32(22)61-41)63-43(59)16-5-27(50)37(55)28(51)6-16/h1-11,33-34,40-41,44-51,53-55,57H,12-13H2,(H,52,56)/t33-,34-,40-,41-/m1/s1	Oc1cc2O[C@@H]([C@@H](Cc2c(c1)O)OC(=O)c1cc(O)c(c(c1)O)O)c1cc(O)c(=O)c2c(c1)c(cc(c2O)O)[C@H]1Oc2cc(O)cc(c2C[C@H]1OC(=O)c1cc(O)c(c(c1)O)O)O	Q9NPD5,Q9Y6L6	2
Quercetagetin	Flavonols	2-(3,4-dihydroxyphenyl)-3,5,6,7-tetrahydroxychromen-4-one	C15H10O8	ZVOLCUVKHLEPEV-UHFFFAOYSA-N	InChI=1S/C15H10O8/c16-6-2-1-5(3-7(6)17)15-14(22)13(21)10-9(23-15)4-8(18)11(19)12(10)20/h1-4,16-20,22H	Oc1ccc(cc1O)c1oc2cc(O)c(c(c2c(=O)c1O)O)O	P28907,P11309,P04745	3
Pinocembrin	Flavanones	(2S)-5,7-dihydroxy-2-phenyl-2,3-dihydrochromen-4-one	C15H12O4	URFCJEUYXNAHFI-ZDUSSCGKSA-N	InChI=1S/C15H12O4/c16-10-6-11(17)15-12(18)8-13(19-14(15)7-10)9-4-2-1-3-5-9/h1-7,13,16-17H,8H2/t13-/m0/s1	Oc1cc2O[C@@H](CC(=O)c2c(c1)O)c1ccccc1	Q9NPD5,Q9Y6L6,P04798,P11511,P11309,P63092,P05177,Q16678	8
(3S)-3,5,7-Trihydroxy-2-[(2S,3S)-3-(4-Hydroxy-3-Methoxyphenyl)-2-(Hydroxymethyl)-2,3-Dihydro-1,4-Benzodioxin-6-Yl]-2,3-Dihydrochromen-4-One	Flavanonol	(3S)-3,5,7-trihydroxy-2-[(2S,3S)-3-(4-hydroxy-3-methoxyphenyl)-2-(hydroxymethyl)-2,3-dihydro-1,4-benzodioxin-6-yl]-2,3-dihydrochromen-4-one	C25H22O10	SEBFKMXJBCUCAI-ILJKEPSESA-N	InChI=1S/C25H22O10/c1-32-17-6-11(2-4-14(17)28)24-20(10-26)33-16-5-3-12(7-18(16)34-24)25-23(31)22(30)21-15(29)8-13(27)9-19(21)35-25/h2-9,20,23-29,31H,10H2,1H3/t20-,23+,24-,25?/m0/s1	OC[C@@H]1Oc2ccc(cc2O[C@H]1c1ccc(c(c1)OC)O)C1Oc2cc(O)cc(c2C(=O)[C@H]1O)O	O75496,Q96KQ7,Q9UNA4,Q9Y253	4
b"(2S)-2-Methoxykurarinone"	Flavanones	(2S)-7-hydroxy-2-(4-hydroxy-2-methoxyphenyl)-5-methoxy-8-[(2R)-5-methyl-2-prop-1-en-2-ylhex-4-enyl]-2,3-dihydrochromen-4-one	C27H32O6	KTAQQSUPNZAWEY-OSPHWJPCSA-N	InChI=1S/C27H32O6/c1-15(2)7-8-17(16(3)4)11-20-21(29)13-25(32-6)26-22(30)14-24(33-27(20)26)19-10-9-18(28)12-23(19)31-5/h7,9-10,12-13,17,24,28-29H,3,8,11,14H2,1-2,4-6H3/t17-,24+/m1/s1	COc1cc(O)c(c2c1C(=O)C[C@H](O2)c1ccc(cc1OC)O)C[C@H](C(=C)C)CC=C(C)C	P56817	1
Fisetin Tetramethyl Ether	Flavonols	2-(3,4-dimethoxyphenyl)-3,7-dimethoxychromen-4-one	C19H18O6	NAMFTZBUZYVNST-UHFFFAOYSA-N	InChI=1S/C19H18O6/c1-21-12-6-7-13-15(10-12)25-18(19(24-4)17(13)20)11-5-8-14(22-2)16(9-11)23-3/h5-10H,1-4H3	COc1ccc2c(c1)oc(c(c2=O)OC)c1ccc(c(c1)OC)OC	Q9UNQ0	1
b"5,7,3-Trihydroxy-3,5-Dimethoxy-2-(3-Methylbut-2-Enyl)Flavone"	Flavonols	5,7-dihydroxy-2-[3-hydroxy-5-methoxy-2-(3-methylbut-2-enyl)phenyl]-3-methoxychromen-4-one	C22H22O7	DFZUWIAIIXJYQQ-UHFFFAOYSA-N	InChI=1S/C22H22O7/c1-11(2)5-6-14-15(9-13(27-3)10-16(14)24)21-22(28-4)20(26)19-17(25)7-12(23)8-18(19)29-21/h5,7-10,23-25H,6H2,1-4H3	COc1cc(O)c(c(c1)c1oc2cc(O)cc(c2c(=O)c1OC)O)CC=C(C)C	Q9UNQ0	1
b"(2S)-3,4,7,8-Tetrahydroxy-2,2-Dimethyl-2,6-Bichroman-4-One"	Flavanones	(2S)-7-hydroxy-2-(3,4,8-trihydroxy-2,2-dimethyl-3,4-dihydrochromen-6-yl)-2,3-dihydrochromen-4-one	C20H20O7	CKBIVADBUPGTKI-DMKPSLHHSA-N	InChI=1S/C20H20O7/c1-20(2)19(25)17(24)12-5-9(6-14(23)18(12)27-20)15-8-13(22)11-4-3-10(21)7-16(11)26-15/h3-7,15,17,19,21,23-25H,8H2,1-2H3/t15-,17?,19?/m0/s1	Oc1ccc2c(c1)O[C@@H](CC2=O)c1cc(O)c2c(c1)C(O)C(C(O2)(C)C)O	P18031	1
Isoformonentin	Isoflavones	3-(4-hydroxyphenyl)-7-methoxychromen-4-one	C16H12O4	LNIQZRIHAMVRJA-UHFFFAOYSA-N	InChI=1S/C16H12O4/c1-19-12-6-7-13-15(8-12)20-9-14(16(13)18)10-2-4-11(17)5-3-10/h2-9,17H,1H3	COc1ccc2c(c1)occ(c2=O)c1ccc(cc1)O	P03372	1
b"4,7-Dimethoxy-5-Hydroxygenistein"	Isoflavones	5-hydroxy-7-methoxy-3-(4-methoxyphenyl)chromen-4-one	C17H14O5	DQNLRFRBAWCJHQ-UHFFFAOYSA-N	InChI=1S/C17H14O5/c1-20-11-5-3-10(4-6-11)13-9-22-15-8-12(21-2)7-14(18)16(15)17(13)19/h3-9,18H,1-2H3	COc1ccc(cc1)c1coc2c(c1=O)c(O)cc(c2)OC	Q16637,P33261,P51151,P38398,O15118,Q04206,P10635,Q96QE3,P11712,P49798,Q03164,P05177,Q16236,Q9UNA4	14
Geranin	Flavan-3-ols	</td></tr>\r\n\t\t\t\t<tr><td align=right><b>Synonyms: &nbsp</b>	C30H24O11	GVKLXAPXNKDQGB-TXZJYACMSA-N	InChI=1S/C30H24O11/c31-14-4-1-12(2-5-14)27-21(37)10-16-18(34)11-23-25(28(16)39-27)26-24-20(36)8-15(32)9-22(24)40-30(41-23,29(26)38)13-3-6-17(33)19(35)7-13/h1-9,11,21,26-27,29,31-38H,10H2/t21-,26+,27+,29+,30-/m0/s1	Oc1cc(O)c2c(c1)O[C@@]1([C@@H]([C@H]2c2c(O1)cc(c1c2O[C@H](c2ccc(cc2)O)[C@H](C1)O)O)O)c1ccc(c(c1)O)O	P15692,P17948,P49763	3
Icaritin	Flavonols	3,5,7-trihydroxy-2-(4-methoxyphenyl)-8-(3-methylbut-2-enyl)chromen-4-one	C21H20O6	TUUXBSASAQJECY-UHFFFAOYSA-N	InChI=1S/C21H20O6/c1-11(2)4-9-14-15(22)10-16(23)17-18(24)19(25)20(27-21(14)17)12-5-7-13(26-3)8-6-12/h4-8,10,22-23,25H,9H2,1-3H3	COc1ccc(cc1)c1oc2c(CC=C(C)C)c(O)cc(c2c(=O)c1O)O	O76074,P08183,O75874	3
Acacetin	Flavones	5,7-dihydroxy-2-(4-methoxyphenyl)chromen-4-one	C16H12O5	DANYIYRPLHHOCZ-UHFFFAOYSA-N	InChI=1S/C16H12O5/c1-20-11-4-2-9(3-5-11)14-8-13(19)16-12(18)6-10(17)7-15(16)21-14/h2-8,17-18H,1H3	COc1ccc(cc1)c1cc(=O)c2c(o1)cc(cc2O)O	Q03181,Q16637,P33261,P51151,P49336,Q16665,O15118,P04798,P00352,P02545,Q07869,P04745,P10635,Q13148,Q99700,Q96QE3,P37231,P00533,P11712,O75604,Q03164,P10636,P08684,P05177,Q16678	25
Burttinonedehydrate	Flavanones	(2S)-5,7-dihydroxy-2-[4-methoxy-3-[(1E)-3-methylbuta-1,3-dienyl]-5-(3-methylbut-2-enyl)phenyl]-2,3-dihydrochromen-4-one	C26H28O5	NCRSCUAICIRLHP-DRGXBFSJSA-N	InChI=1S/C26H28O5/c1-15(2)6-8-17-10-19(11-18(26(17)30-5)9-7-16(3)4)23-14-22(29)25-21(28)12-20(27)13-24(25)31-23/h6-8,10-13,23,27-28H,1,9,14H2,2-5H3/b8-6+/t23-/m0/s1	COc1c(CC=C(C)C)cc(cc1/C=C/C(=C)C)[C@@H]1CC(=O)c2c(O1)cc(cc2O)O	P18031	1
Bavachinin A	Flavanones	(2S)-2-(4-hydroxyphenyl)-7-methoxy-6-(3-methylbut-2-enyl)-2,3-dihydrochromen-4-one	C21H22O4	VOCGSQHKPZSIKB-FQEVSTJZSA-N	InChI=1S/C21H22O4/c1-13(2)4-5-15-10-17-18(23)11-20(14-6-8-16(22)9-7-14)25-21(17)12-19(15)24-3/h4,6-10,12,20,22H,5,11H2,1-3H3/t20-/m0/s1	COc1cc2O[C@@H](CC(=O)c2cc1CC=C(C)C)c1ccc(cc1)O	Q9UBT6,Q03164,O00748,Q9NUW8,P23141,P11021,P37231	7
Scandenin	Others	4-hydroxy-3-(4-hydroxyphenyl)-5-methoxy-8,8-dimethyl-6-(3-methylbut-2-enyl)pyrano[2,3-h]chromen-2-one	C26H26O6	AAKJUGSASOCUFQ-UHFFFAOYSA-N	InChI=1S/C26H26O6/c1-14(2)6-11-17-22-18(12-13-26(3,4)32-22)24-20(23(17)30-5)21(28)19(25(29)31-24)15-7-9-16(27)10-8-15/h6-10,12-13,27-28H,11H2,1-5H3	COc1c(CC=C(C)C)c2OC(C)(C)C=Cc2c2c1c(O)c(c(=O)o2)c1ccc(cc1)O	P00352,O94782,P08684,Q9Y6L6,Q9NPD5,Q9NUW8,Q99714,P11473,B2RXH2	9
Retusin 7-Methyl Ether	Isoflavones	8-hydroxy-7-methoxy-3-(4-methoxyphenyl)chromen-4-one	C17H14O5	RRCYPDDIDYVEIW-UHFFFAOYSA-N	InChI=1S/C17H14O5/c1-20-11-5-3-10(4-6-11)13-9-22-17-12(15(13)18)7-8-14(21-2)16(17)19/h3-9,19H,1-2H3	COc1ccc(cc1)c1coc2c(c1=O)ccc(c2O)OC	P00352,P10636,P08684,Q9NPD5,P04637,Q9Y6L6,Q16637,P10828	8
Pmf	Flavones	5,7-dimethoxy-2-(3,4,5-trimethoxyphenyl)chromen-4-one	C20H20O7	GIKVSFNAEBQLGB-UHFFFAOYSA-N	InChI=1S/C20H20O7/c1-22-12-8-15(23-2)19-13(21)10-14(27-16(19)9-12)11-6-17(24-3)20(26-5)18(7-11)25-4/h6-10H,1-5H3	COc1cc(OC)c2c(c1)oc(cc2=O)c1cc(OC)c(c(c1)OC)OC	P08183	1
Cirsimaritin	Flavones	5-hydroxy-2-(4-hydroxyphenyl)-6,7-dimethoxychromen-4-one	C17H14O6	ZIIAJIWLQUVGHB-UHFFFAOYSA-N	InChI=1S/C17H14O6/c1-21-14-8-13-15(16(20)17(14)22-2)11(19)7-12(23-13)9-3-5-10(18)6-4-9/h3-8,18,20H,1-2H3	COc1cc2oc(cc(=O)c2c(c1OC)O)c1ccc(cc1)O	P04062,P06746,P35354,P0DMS8,P23219,Q9UIF8,P63092,Q9UNA4,Q96QE3,B2RXH2	10
Glisoflavone	Isoflavones	3-[3,4-dihydroxy-5-(3-methylbut-2-enyl)phenyl]-7-hydroxy-5-methoxychromen-4-one	C21H20O6	PYVPKOSKOWDDSV-UHFFFAOYSA-N	InChI=1S/C21H20O6/c1-11(2)4-5-12-6-13(7-16(23)20(12)24)15-10-27-18-9-14(22)8-17(26-3)19(18)21(15)25/h4,6-10,22-24H,5H2,1-3H3	COc1cc(O)cc2c1c(=O)c(co2)c1cc(O)c(c(c1)CC=C(C)C)O	P18031,P17706,P51452	3
b"(2S)-7,4-Dihydroxyflavan"	Others	(2S)-2-(4-hydroxyphenyl)-3,4-dihydro-2H-chromen-7-ol	C15H14O3	YXMLGIGHGPSEKA-AWEZNQCLSA-N	InChI=1S/C15H14O3/c16-12-5-1-10(2-6-12)14-8-4-11-3-7-13(17)9-15(11)18-14/h1-3,5-7,9,14,16-17H,4,8H2/t14-/m0/s1	Oc1ccc(cc1)[C@@H]1CCc2c(O1)cc(cc2)O	P11511	1
n.a.	Others	</td></tr>\r\n\t\t\t\t<tr><td align=right><b>Synonyms: &nbsp</b>	C42H30O9	KUTVNHOAKHJJFL-ZSIJVUTGSA-N	InChI=1S/C42H30O9/c43-22-7-1-19(2-8-22)40-37-28-13-25(46)17-32-35(28)39(42(50-32)21-5-11-24(45)12-6-21)30-15-27(48)18-33-36(30)38(29-14-26(47)16-31(49-40)34(29)37)41(51-33)20-3-9-23(44)10-4-20/h1-18,37-48H/t37-,38-,39+,40+,41+,42-/m1/s1	Oc1cc2c3c(c1)O[C@H]([C@@H]3c1cc(O)cc3c1[C@@H](c1c4[C@H]2[C@H](Oc4cc(c1)O)c1ccc(cc1)O)[C@@H](O3)c1ccc(cc1)O)c1ccc(cc1)O	P35354	1
Burttinone	Flavanones	(2S)-5,7-dihydroxy-2-[3-[(E)-3-hydroxy-3-methylbut-1-enyl]-4-methoxy-5-(3-methylbut-2-enyl)phenyl]-2,3-dihydrochromen-4-one	C26H30O6	BOBWTYODGOYWRC-UVIRAJKCSA-N	InChI=1S/C26H30O6/c1-15(2)6-7-16-10-18(11-17(25(16)31-5)8-9-26(3,4)30)22-14-21(29)24-20(28)12-19(27)13-23(24)32-22/h6,8-13,22,27-28,30H,7,14H2,1-5H3/b9-8+/t22-/m0/s1	COc1c(CC=C(C)C)cc(cc1/C=C/C(O)(C)C)[C@@H]1CC(=O)c2c(O1)cc(cc2O)O	P18031	1
Biochanin	Isoflavones	5,7-dihydroxy-3-(4-methoxyphenyl)chromen-4-one	C16H12O5	WUADCCWRTIWANL-UHFFFAOYSA-N	InChI=1S/C16H12O5/c1-20-11-4-2-9(3-5-11)12-8-21-14-7-10(17)6-13(18)15(14)16(12)19/h2-8,17-18H,1H3	COc1ccc(cc1)c1coc2c(c1=O)c(O)cc(c2)O	P15121,P19838,Q03181,Q9NPD5,P42224,Q9Y6L6,P18054,Q16637,P43166,P51151,P33261,P16152,P38398,P43220,P10275,P04637,P40763,P14061,P11511,P02545,Q04206,P00352,P37059,Q92887,P11309,O75496,Q99714,P46063,Q13148,O60218,P22748,P27338,Q96QE3,P11712,O43570,Q03164,P10636,P05412,Q16236,P33527,B2RXH2	41
Flavanomarein	Flavanones	(2S)-2-(3,4-dihydroxyphenyl)-8-hydroxy-7-[(2S,3R,4S,5S,6R)-3,4,5-trihydroxy-6-(hydroxymethyl)oxan-2-yl]oxy-2,3-dihydrochromen-4-one	C21H22O11	DGGOLFCPSUVVHX-RTHJTPBESA-N	InChI=1S/C21H22O11/c22-7-15-16(26)18(28)19(29)21(32-15)31-13-4-2-9-11(24)6-14(30-20(9)17(13)27)8-1-3-10(23)12(25)5-8/h1-5,14-16,18-19,21-23,25-29H,6-7H2/t14-,15+,16+,18-,19+,21+/m0/s1	OC[C@H]1O[C@@H](Oc2ccc3c(c2O)O[C@@H](CC3=O)c2ccc(c(c2)O)O)[C@@H]([C@H]([C@@H]1O)O)O	P27695,Q9UBT6	2
2-(3,4-Dihydroxyphenyl)-5,7-Dihydroxy-3-[(2S,3R,4R,5R,6S)-3,4,5-Trihydroxy-6-Methyloxan-2-Yl]Oxychromen-4-One;Hydrate	Flavonols	2-(3,4-dihydroxyphenyl)-5,7-dihydroxy-3-[(2S,3R,4R,5R,6S)-3,4,5-trihydroxy-6-methyloxan-2-yl]oxychromen-4-one;hydrate	C21H20O11.H2O	UGZLJOKGLBVBHF-IKGPWECESA-N	InChI=1S/C21H20O11.H2O/c1-7-15(26)17(28)18(29)21(30-7)32-20-16(27)14-12(25)5-9(22)6-13(14)31-19(20)8-2-3-10(23)11(24)4-8;/h2-7,15,17-18,21-26,28-29H,1H3;1H2/t7-,15-,17+,18+,21-;/m0./s1	Oc1cc(O)c2c(c1)oc(c(c2=O)O[C@@H]1O[C@@H](C)[C@@H]([C@H]([C@H]1O)O)O)c1ccc(c(c1)O)O.O	P83916,O94925,Q9UBT6,O75496,Q16236,O95398,P07237,Q9UNA4,Q9Y253	9
2-(4-Hydroxyphenyl)Chromen-4-One	Flavones	2-(4-hydroxyphenyl)chromen-4-one	C15H10O3	SHGLJXBLXNNCTE-UHFFFAOYSA-N	InChI=1S/C15H10O3/c16-11-7-5-10(6-8-11)15-9-13(17)12-3-1-2-4-14(12)18-15/h1-9,16H	Oc1ccc(cc1)c1cc(=O)c2c(o1)cccc2	P43220,P09917,Q16637,Q16236,Q9NUW8,P63092,P06239,P51151,O95271,B2RXH2,Q96QE3	11
Abyssinone Iv	Flavanones	(2S)-7-hydroxy-2-[4-hydroxy-3,5-bis(3-methylbut-2-enyl)phenyl]-2,3-dihydrochromen-4-one	C25H28O4	JBQLRZGPTDOWQA-QHCPKHFHSA-N	InChI=1S/C25H28O4/c1-15(2)5-7-17-11-19(12-18(25(17)28)8-6-16(3)4)23-14-22(27)21-10-9-20(26)13-24(21)29-23/h5-6,9-13,23,26,28H,7-8,14H2,1-4H3/t23-/m0/s1	CC(=CCc1cc(cc(c1O)CC=C(C)C)[C@@H]1CC(=O)c2c(O1)cc(cc2)O)C	P18031	1
Candidin	Flavones	5-methoxy-8,8-dimethyl-2-phenylpyrano[2,3-h]chromen-4-one	C21H18O4	DPAGRPSAFDXQDN-UHFFFAOYSA-N	InChI=1S/C21H18O4/c1-21(2)10-9-14-17(25-21)12-18(23-3)19-15(22)11-16(24-20(14)19)13-7-5-4-6-8-13/h4-12H,1-3H3	COc1cc2OC(C)(C)C=Cc2c2c1c(=O)cc(o2)c1ccccc1	P00352,P43220,P39748,Q9Y468,O75496,Q9UIF8,P84022,O75874	8
b"(2S)-3,4,5,7-Tetrahydroxy-2,2-Dimethyl-8-(3-Methylbut-2-Enyl)-2,6-Bichroman-4-One"	Flavanones	(2S)-2-[3,4-dihydroxy-2,2-dimethyl-8-(3-methylbut-2-enyl)-3,4-dihydrochromen-6-yl]-5,7-dihydroxy-2,3-dihydrochromen-4-one	C25H28O7	KYGXFLIBLYFPAZ-HRRASNIPSA-N	InChI=1S/C25H28O7/c1-12(2)5-6-13-7-14(8-16-22(29)24(30)25(3,4)32-23(13)16)19-11-18(28)21-17(27)9-15(26)10-20(21)31-19/h5,7-10,19,22,24,26-27,29-30H,6,11H2,1-4H3/t19-,22?,24?/m0/s1	CC(=CCc1cc(cc2c1OC(C)(C)C(C2O)O)[C@@H]1CC(=O)c2c(O1)cc(cc2O)O)C	P18031	1
7-Hydroxy-2-Methyl-3-Phenylchromen-4-One	Isoflavones	7-hydroxy-2-methyl-3-phenylchromen-4-one	C16H12O3	BBCDTCKKROIGAB-UHFFFAOYSA-N	InChI=1S/C16H12O3/c1-10-15(11-5-3-2-4-6-11)16(18)13-8-7-12(17)9-14(13)19-10/h2-9,17H,1H3	Oc1ccc2c(c1)oc(c(c2=O)c1ccccc1)C	P00352,P17405,B2RXH2	3
5-Hydroxy-2-(3-Hydroxy-4-Methoxyphenyl)-7-[(2S,3R,4S,5S,6R)-3,4,5-Trihydroxy-6-(Hydroxymethyl)Oxan-2-Yl]Oxychromen-4-One	Flavones	5-hydroxy-2-(3-hydroxy-4-methoxyphenyl)-7-[(2S,3R,4S,5S,6R)-3,4,5-trihydroxy-6-(hydroxymethyl)oxan-2-yl]oxychromen-4-one	C22H22O11	WKUHPOMCLBLCOV-MIUGBVLSSA-N	InChI=1S/C22H22O11/c1-30-14-3-2-9(4-11(14)24)15-7-13(26)18-12(25)5-10(6-16(18)32-15)31-22-21(29)20(28)19(27)17(8-23)33-22/h2-7,17,19-25,27-29H,8H2,1H3/t17-,19-,20+,21-,22-/m1/s1	OC[C@H]1O[C@@H](Oc2cc(O)c3c(c2)oc(cc3=O)c2ccc(c(c2)O)OC)[C@@H]([C@H]([C@@H]1O)O)O	O75874	1
Kaempferol 3-O-(5-O-Acetyl-Alpha-D-Apiofuranosyl)-7-O-Alpha-L-Rhamnopyranoside	Flavonols	[(3R,4S,5R)-3,4-dihydroxy-5-[5-hydroxy-2-(4-hydroxyphenyl)-4-oxo-7-[(2S,3R,4R,5R,6S)-3,4,5-trihydroxy-6-methyloxan-2-yl]oxychromen-3-yl]oxyoxolan-3-yl]methyl acetate	C28H30O15	XOUMRQRJVFZBHB-BEAAOXLFSA-N	InChI=1S/C28H30O15/c1-11-19(32)21(34)22(35)26(40-11)41-15-7-16(31)18-17(8-15)42-23(13-3-5-14(30)6-4-13)24(20(18)33)43-27-25(36)28(37,10-39-27)9-38-12(2)29/h3-8,11,19,21-22,25-27,30-32,34-37H,9-10H2,1-2H3/t11-,19-,21+,22+,25+,26-,27+,28-/m0/s1	CC(=O)OC[C@]1(O)CO[C@@H]([C@H]1O)Oc1c(oc2c(c1=O)c(O)cc(c2)O[C@@H]1O[C@@H](C)[C@@H]([C@H]([C@H]1O)O)O)c1ccc(cc1)O	P11387,P11388	2
Chrysin	Flavones	5,7-dihydroxy-2-phenylchromen-4-one	C15H10O4	RTIXKCRFFJGDFG-UHFFFAOYSA-N	InChI=1S/C15H10O4/c16-10-6-11(17)15-12(18)8-13(19-14(15)7-10)9-4-2-1-3-5-9/h1-8,16-17H	Oc1cc(O)c2c(c1)oc(cc2=O)c1ccccc1	P43166,P47989,P16152,P22309,Q07869,P10635,P49841,P11712,P10636,P56937,Q9HAW9,Q9NPD5,Q9Y6L6,P33261,Q16665,P19793,O00519,P00915,P11511,P00352,Q16445,P20813,O95067,O75496,P22748,P37231,O75874,Q03164,P00918,P05177,Q16236,P33527,P14151,P15121,Q03181,P35354,Q16637,P22310,P10275,P04798,Q9Y3R4,P14061,P37059,Q9HAW8,P11309,P08183,P27338,Q04760,Q16678,P04792,P62158,P16109,Q9UNQ0,P16581,Q00534,P54855,Q16790,…	61
(2S)-7-hydroxy-2-[2-(2-hydroxypropan-2-yl)-7-(3-methylbut-2-enyl)-2,3-dihydro-1-benzofuran-5-yl]-8-(3-methylbut-2-enyl)-2,3-dihydrochromen-4-one	Flavanones	(2S)-7-hydroxy-2-[2-(2-hydroxypropan-2-yl)-7-(3-methylbut-2-enyl)-2,3-dihydro-1-benzofuran-5-yl]-8-(3-methylbut-2-enyl)-2,3-dihydrochromen-4-one	C30H36O5	GUOZFKYIHZVTRA-QBHOUYDASA-N	InChI=1S/C30H36O5/c1-17(2)7-9-19-13-20(14-21-15-27(30(5,6)33)35-28(19)21)26-16-25(32)23-11-12-24(31)22(29(23)34-26)10-8-18(3)4/h7-8,11-14,26-27,31,33H,9-10,15-16H2,1-6H3/t26-,27?/m0/s1	CC(=CCc1c(O)ccc2c1O[C@@H](CC2=O)c1cc(CC=C(C)C)c2c(c1)CC(O2)C(O)(C)C)C	P19793	1
b"(2S)-3,7,8-Trihydroxy-2,2-Dimethyl-2,6-Bichroman-4-One"	Flavanones	(2S)-2-(3,8-dihydroxy-2,2-dimethyl-3,4-dihydrochromen-6-yl)-7-hydroxy-2,3-dihydrochromen-4-one	C20H20O6	VQRCDZLYMBXGNJ-ATNAJCNCSA-N	InChI=1S/C20H20O6/c1-20(2)18(24)7-11-5-10(6-15(23)19(11)26-20)16-9-14(22)13-4-3-12(21)8-17(13)25-16/h3-6,8,16,18,21,23-24H,7,9H2,1-2H3/t16-,18?/m0/s1	Oc1ccc2c(c1)O[C@@H](CC2=O)c1cc(O)c2c(c1)CC(C(O2)(C)C)O	P18031	1
Podocarpusflavone	Flavones	5,7-dihydroxy-8-[2-hydroxy-5-(5-hydroxy-7-methoxy-4-oxochromen-2-yl)phenyl]-2-(4-methoxyphenyl)chromen-4-one	C32H22O10	GZTVUTQZSAZUIY-UHFFFAOYSA-N	InChI=1S/C32H22O10/c1-39-17-6-3-15(4-7-17)26-14-25(38)31-23(36)12-22(35)29(32(31)42-26)19-9-16(5-8-20(19)33)27-13-24(37)30-21(34)10-18(40-2)11-28(30)41-27/h3-14,33-36H,1-2H3	COc1ccc(cc1)c1cc(=O)c2c(o1)c(c(cc2O)O)c1cc(ccc1O)c1cc(=O)c2c(o1)cc(cc2O)OC	P56817	1
2-(2,4-Dihydroxyphenyl)-5-(E)-Propenylbenzofuran	Others	4-[5-[(E)-prop-1-enyl]-1-benzofuran-2-yl]benzene-1,3-diol	C17H14O3	SDWZWUUOXFFJSA-NSCUHMNNSA-N	InChI=1S/C17H14O3/c1-2-3-11-4-7-16-12(8-11)9-17(20-16)14-6-5-13(18)10-15(14)19/h2-10,18-19H,1H3/b3-2+	C/C=C/c1ccc2c(c1)cc(o2)c1ccc(cc1O)O	O14684,P09917	2
Fustin	Flavanonol	(2R,3R)-2-(3,4-dihydroxyphenyl)-3,7-dihydroxy-2,3-dihydrochromen-4-one	C15H12O6	FNUPUYFWZXZMIE-LSDHHAIUSA-N	InChI=1S/C15H12O6/c16-8-2-3-9-12(6-8)21-15(14(20)13(9)19)7-1-4-10(17)11(18)5-7/h1-6,14-18,20H/t14-,15+/m0/s1	Oc1ccc2c(c1)O[C@@H]([C@H](C2=O)O)c1ccc(c(c1)O)O	P11511	1
Khrinone E	Isoflavones	7-hydroxy-3-(3-hydroxy-2,4-dimethoxyphenyl)chromen-4-one	C17H14O6	WDHLJEOPUWGKKG-UHFFFAOYSA-N	InChI=1S/C17H14O6/c1-21-13-6-5-10(17(22-2)16(13)20)12-8-23-14-7-9(18)3-4-11(14)15(12)19/h3-8,18,20H,1-2H3	COc1c(O)c(OC)ccc1c1coc2c(c1=O)ccc(c2)O	Q9NPD5,Q9Y6L6,Q99714,B2RXH2	4
3-Methoxy-4-(6-Methoxybenzofuran-2-Yl)Phenol	Others	3-methoxy-4-(6-methoxy-1-benzofuran-2-yl)phenol	C16H14O4	YCDZKMJZSGRQML-UHFFFAOYSA-N	InChI=1S/C16H14O4/c1-18-12-5-3-10-7-16(20-14(10)9-12)13-6-4-11(17)8-15(13)19-2/h3-9,17H,1-2H3	COc1cc(O)ccc1c1cc2c(o1)cc(cc2)OC	P18031	1
Licoagrone	Others	2-[4,5-dihydroxy-2-[(Z)-[6-hydroxy-7-(3-methylbut-2-enyl)-3-oxo-1-benzofuran-2-ylidene]methyl]phenyl]-6-hydroxy-2-[4-hydroxy-3-(3-methylbut-2-enyl)benzoyl]-5-(3-methylbut-2-enyl)-1-benzofuran-3-one	C45H42O10	MEJLVLSNRYLDSG-MDCVPAOJSA-N	InChI=1S/C45H42O10/c1-23(2)7-10-26-17-28(12-15-34(26)46)43(52)45(44(53)32-18-27(11-8-24(3)4)36(48)22-39(32)55-45)33-21-38(50)37(49)19-29(33)20-40-41(51)31-14-16-35(47)30(42(31)54-40)13-9-25(5)6/h7-9,12,14-22,46-50H,10-11,13H2,1-6H3/b40-20-	CC(=CCc1cc2c(cc1O)OC(C2=O)(C(=O)c1ccc(c(c1)CC=C(C)C)O)c1cc(O)c(cc1/C=C/1Oc2c(C1=O)ccc(c2CC=C(C)C)O)O)C	P18031,P17706,P51452	3
5-Methoxy-2-Phenylchromen-4-One	Flavones	5-methoxy-2-phenylchromen-4-one	C16H12O3	XRQSPUXANRGDAV-UHFFFAOYSA-N	InChI=1S/C16H12O3/c1-18-13-8-5-9-14-16(13)12(17)10-15(19-14)11-6-3-2-4-7-11/h2-10H,1H3	COc1cccc2c1c(=O)cc(o2)c1ccccc1	P00352,Q9UBT6,P08684,P10636,P04637,P10275,Q99714,B2RXH2,Q96QE3	9
Cirsimarin	Flavones	5-hydroxy-6,7-dimethoxy-2-[4-[(2S,3R,4S,5S,6R)-3,4,5-trihydroxy-6-(hydroxymethyl)oxan-2-yl]oxyphenyl]chromen-4-one	C23H24O11	RETJLKUBHXTIGH-FZFRBNDOSA-N	InChI=1S/C23H24O11/c1-30-15-8-14-17(19(27)22(15)31-2)12(25)7-13(33-14)10-3-5-11(6-4-10)32-23-21(29)20(28)18(26)16(9-24)34-23/h3-8,16,18,20-21,23-24,26-29H,9H2,1-2H3/t16-,18-,20+,21-,23-/m1/s1	OC[C@H]1O[C@@H](Oc2ccc(cc2)c2cc(=O)c3c(o2)cc(c(c3O)OC)OC)[C@@H]([C@H]([C@@H]1O)O)O	P47989	1
Epigalocatechin Gallate	Flavan-3-ols	[(2R,3R)-5,7-dihydroxy-2-(3,4,5-trihydroxyphenyl)-3,4-dihydro-2H-chromen-3-yl] 3,4,5-trihydroxybenzoate	C22H18O11	WMBWREPUVVBILR-WIYYLYMNSA-N	InChI=1S/C22H18O11/c23-10-5-12(24)11-7-18(33-22(31)9-3-15(27)20(30)16(28)4-9)21(32-17(11)6-10)8-1-13(25)19(29)14(26)2-8/h1-6,18,21,23-30H,7H2/t18-,21-/m1/s1	Oc1cc(O)c2c(c1)O[C@@H]([C@@H](C2)OC(=O)c1cc(O)c(c(c1)O)O)c1cc(O)c(c(c1)O)O	P06746,Q09472,Q13526,O95342,P10636,P05412,P52209,P08246,P27695,Q9NPD5,Q9Y6L6,P23219,P04626,P08865,P05067,Q16539,P14618,P04745,P10828,P37231,Q03164,P08253,Q16236,Q96KQ7,P56817,P08581,P50281,Q9NUW8,P26358,P02768,P10275,Q92831,P08183,P08238,P04792,P00374,B2RXH2,P10415,P49327,O14746,P46063,Q13627,P09237	43
Glabrol	Flavanones	(2S)-7-hydroxy-2-[4-hydroxy-3-(3-methylbut-2-enyl)phenyl]-8-(3-methylbut-2-enyl)-2,3-dihydrochromen-4-one	C25H28O4	CUFAXDWQDQQKFF-DEOSSOPVSA-N	InChI=1S/C25H28O4/c1-15(2)5-7-17-13-18(8-11-21(17)26)24-14-23(28)20-10-12-22(27)19(25(20)29-24)9-6-16(3)4/h5-6,8,10-13,24,26-27H,7,9,14H2,1-4H3/t24-/m0/s1	CC(=CCc1cc(ccc1O)[C@@H]1CC(=O)c2c(O1)c(CC=C(C)C)c(cc2)O)C	P18031,O75164,O75496,Q03431,P84022,P37840,Q99700,O75874	8
Isolicoflavonol	Flavonols	3,5,7-trihydroxy-2-[4-hydroxy-3-(3-methylbut-2-enyl)phenyl]chromen-4-one	C20H18O6	PGCKDCPTJAQQSQ-UHFFFAOYSA-N	InChI=1S/C20H18O6/c1-10(2)3-4-11-7-12(5-6-14(11)22)20-19(25)18(24)17-15(23)8-13(21)9-16(17)26-20/h3,5-9,21-23,25H,4H2,1-2H3	CC(=CCc1cc(ccc1O)c1oc2cc(O)cc(c2c(=O)c1O)O)C	P11511,P18031,O75496,Q03431,P84022,Q9UNA4,Q9Y253	7
Daidzein	Isoflavones	7-hydroxy-3-(4-hydroxyphenyl)chromen-4-one	C15H10O4	ZQSIJRDFPHDXIC-UHFFFAOYSA-N	InChI=1S/C15H10O4/c16-10-3-1-9(2-4-10)13-8-19-14-7-11(17)5-6-12(14)15(13)18/h1-8,16-17H	Oc1ccc(cc1)c1coc2c(c1=O)ccc(c2)O	P27695,Q9H0H5,P15121,P19838,P15289,Q03181,P11021,Q9NPD5,Q9Y6L6,Q9NUW8,P47989,O15118,P10275,P22309,P14061,P00352,P37059,P03372,Q07869,B2RXH2,O75496,P51449,P04745,Q99714,Q01453,Q92731,O60218,P22748,P10828,P27338,P37231,Q96QE3,O43570,O60656,P11712,P49798,P15428,P08684,P10636,Q16236,Q96KQ7,P05091,P40225	43
Mucronulatol(+/-)	Others	3-(3-hydroxy-2,4-dimethoxyphenyl)-3,4-dihydro-2H-chromen-7-ol	C17H18O5	NUNFZNIXYWTZMW-UHFFFAOYSA-N	InChI=1S/C17H18O5/c1-20-14-6-5-13(17(21-2)16(14)19)11-7-10-3-4-12(18)8-15(10)22-9-11/h3-6,8,11,18-19H,7,9H2,1-2H3	COc1c(ccc(c1O)OC)C1COc2c(C1)ccc(c2)O	P43220,Q9NPD5,O75496,Q9Y6L6,Q9HC16,Q9UNA4	6
Narcissin	Flavonols	5,7-dihydroxy-2-(4-hydroxy-3-methoxyphenyl)-3-[(2S,3R,4S,5S,6R)-3,4,5-trihydroxy-6-[[(2R,3R,4R,5R,6S)-3,4,5-trihydroxy-6-methyloxan-2-yl]oxymethyl]oxan-2-yl]oxychromen-4-one	C28H32O16	UIDGLYUNOUKLBM-GEBJFKNCSA-N	InChI=1S/C28H32O16/c1-9-18(32)21(35)23(37)27(41-9)40-8-16-19(33)22(36)24(38)28(43-16)44-26-20(34)17-13(31)6-11(29)7-15(17)42-25(26)10-3-4-12(30)14(5-10)39-2/h3-7,9,16,18-19,21-24,27-33,35-38H,8H2,1-2H3/t9-,16+,18-,19+,21+,22-,23+,24+,27+,28-/m0/s1	COc1cc(ccc1O)c1oc2cc(O)cc(c2c(=O)c1O[C@@H]1O[C@H](CO[C@@H]2O[C@@H](C)[C@@H]([C@H]([C@H]2O)O)O)[C@H]([C@@H]([C@H]1O)O)O)O	P03372,P08684	2
Sophoraflavanone A	Flavanones	(2S)-8-[(2E)-3,7-dimethylocta-2,6-dienyl]-5,7-dihydroxy-2-(4-hydroxyphenyl)-2,3-dihydrochromen-4-one	C25H28O5	GOAUTULGLLBZSR-YLLUOSTHSA-N	InChI=1S/C25H28O5/c1-15(2)5-4-6-16(3)7-12-19-20(27)13-21(28)24-22(29)14-23(30-25(19)24)17-8-10-18(26)11-9-17/h5,7-11,13,23,26-28H,4,6,12,14H2,1-3H3/b16-7+/t23-/m0/s1	C/C(=CCc1c(O)cc(c2c1O[C@@H](CC2=O)c1ccc(cc1)O)O)/CCC=C(C)C	Q9UNQ0	1
Addisofuran	Others	2-(4-hydroxy-2-methoxyphenyl)-5-(3-methylbut-2-enyl)-1-benzofuran-6-ol	C20H20O4	QZVJJJNZJBVWPG-UHFFFAOYSA-N	InChI=1S/C20H20O4/c1-12(2)4-5-13-8-14-9-20(24-18(14)11-17(13)22)16-7-6-15(21)10-19(16)23-3/h4,6-11,21-22H,5H2,1-3H3	COc1cc(O)ccc1c1oc2c(c1)cc(c(c2)O)CC=C(C)C	P18031	1
Boeravinone D	Isoflavones	3,9,11-trihydroxy-6-methoxy-10-methyl-6H-chromeno[3,4-b]chromen-12-one	C18H14O7	ZESAOJOQKPXOPG-UHFFFAOYSA-N	InChI=1S/C18H14O7/c1-7-10(20)6-12-14(15(7)21)16(22)13-9-4-3-8(19)5-11(9)25-18(23-2)17(13)24-12/h3-6,18-21H,1-2H3	COC1Oc2cc(O)ccc2c2c1oc1cc(O)c(c(c1c2=O)O)C	P56817	1
Sakuranetin	Flavanones	(2S)-5-hydroxy-2-(4-hydroxyphenyl)-7-methoxy-2,3-dihydrochromen-4-one	C16H14O5	DJOJDHGQRNZXQQ-AWEZNQCLSA-N	InChI=1S/C16H14O5/c1-20-11-6-12(18)16-13(19)8-14(21-15(16)7-11)9-2-4-10(17)5-3-9/h2-7,14,17-18H,8H2,1H3/t14-/m0/s1	COc1cc2O[C@@H](CC(=O)c2c(c1)O)c1ccc(cc1)O	P59538,Q9Y3R4	2
Tamarixetin	Flavonols	3,5,7-trihydroxy-2-(3-hydroxy-4-methoxyphenyl)chromen-4-one	C16H12O7	FPLMIPQZHHQWHN-UHFFFAOYSA-N	InChI=1S/C16H12O7/c1-22-11-3-2-7(4-9(11)18)16-15(21)14(20)13-10(19)5-8(17)6-12(13)23-16/h2-6,17-19,21H,1H3	COc1ccc(cc1O)c1oc2cc(O)cc(c2c(=O)c1O)O	P05177,P04798,Q16678	3
4-((2S,3R)-3-(Hydroxymethyl)-5-((E)-Prop-1-Enyl)-2,3-Dihydrobenzofuran-2-Yl)Phenol	Others	4-[(2S,3R)-3-(hydroxymethyl)-5-[(E)-prop-1-enyl]-2,3-dihydro-1-benzofuran-2-yl]phenol	C18H18O3	OGRAMAAKQPETEE-TYZWSJGGSA-N	InChI=1S/C18H18O3/c1-2-3-12-4-9-17-15(10-12)16(11-19)18(21-17)13-5-7-14(20)8-6-13/h2-10,16,18-20H,11H2,1H3/b3-2+/t16-,18+/m0/s1	C/C=C/c1ccc2c(c1)[C@H](CO)[C@H](O2)c1ccc(cc1)O	O14684	1
Kuwanon L	Flavanones	(2S)-2-[3-[(1S,5R,6S)-6-(2,4-dihydroxybenzoyl)-5-(2,4-dihydroxyphenyl)-3-methylcyclohex-2-en-1-yl]-2,4-dihydroxyphenyl]-5,7-dihydroxy-2,3-dihydrochromen-4-one	C35H30O11	ZEZOBFSLMMTYFF-HQSFFLIMSA-N	InChI=1S/C35H30O11/c1-15-8-22(19-4-2-16(36)10-25(19)40)31(34(44)20-5-3-17(37)11-26(20)41)23(9-15)32-24(39)7-6-21(35(32)45)29-14-28(43)33-27(42)12-18(38)13-30(33)46-29/h2-7,9-13,22-23,29,31,36-42,45H,8,14H2,1H3/t22-,23-,29-,31-/m0/s1	Oc1ccc(c(c1)O)[C@@H]1CC(=C[C@@H]([C@H]1C(=O)c1ccc(cc1O)O)c1c(O)ccc(c1O)[C@@H]1CC(=O)c2c(O1)cc(cc2O)O)C	P18031,P51452	2
Kaempferol-3-O-Alpha-L-(2,4-Bis-E-P-Coumaroyl)Rhamnoside	Flavonols	[(2S,3R,4R,5R,6S)-6-[5,7-dihydroxy-2-(4-hydroxyphenyl)-4-oxochromen-3-yl]oxy-4-hydroxy-5-[(E)-3-(4-hydroxyphenyl)prop-2-enoyl]oxy-2-methyloxan-3-yl] (E)-3-(4-hydroxyphenyl)prop-2-enoate	C39H32O14	KMOHJUXDKSMQOG-NCLAQALISA-N	InChI=1S/C39H32O14/c1-20-35(51-30(45)16-6-21-2-10-24(40)11-3-21)34(48)38(52-31(46)17-7-22-4-12-25(41)13-5-22)39(49-20)53-37-33(47)32-28(44)18-27(43)19-29(32)50-36(37)23-8-14-26(42)15-9-23/h2-20,34-35,38-44,48H,1H3/b16-6+,17-7+/t20-,34+,35-,38+,39-/m0/s1	Oc1ccc(cc1)/C=C/C(=O)O[C@H]1[C@H](C)O[C@H]([C@@H]([C@@H]1O)OC(=O)/C=C/c1ccc(cc1)O)Oc1c(oc2c(c1=O)c(O)cc(c2)O)c1ccc(cc1)O	P98170	1
(2S)-Euchrenone A7	Flavanones	(2S)-2-(2,4-dihydroxyphenyl)-7-hydroxy-8-(3-methylbut-2-enyl)-2,3-dihydrochromen-4-one	C20H20O5	JJOUBYOHNYJCOU-IBGZPJMESA-N	InChI=1S/C20H20O5/c1-11(2)3-5-14-16(22)8-7-15-18(24)10-19(25-20(14)15)13-6-4-12(21)9-17(13)23/h3-4,6-9,19,21-23H,5,10H2,1-2H3/t19-/m0/s1	CC(=CCc1c(O)ccc2c1O[C@@H](CC2=O)c1ccc(cc1O)O)C	P11511	1
b"(2S)-6-(Gamma,Gamma-Dimethylallyl)-5-Hydroxy-3,4-Dimethoxy-6,6-Dimethylpyran[2,3:7,8]Flavanone"	Flavanones	(2S)-2-(3,4-dimethoxyphenyl)-5-hydroxy-8,8-dimethyl-6-(3-methylbut-2-enyl)-2,3-dihydropyrano[2,3-h]chromen-4-one	C27H30O6	FUBFEZXQVKEAMQ-NRFANRHFSA-N	InChI=1S/C27H30O6/c1-15(2)7-9-17-24(29)23-19(28)14-21(16-8-10-20(30-5)22(13-16)31-6)32-26(23)18-11-12-27(3,4)33-25(17)18/h7-8,10-13,21,29H,9,14H2,1-6H3/t21-/m0/s1	COc1cc(ccc1OC)[C@@H]1CC(=O)c2c(O1)c1C=CC(Oc1c(c2O)CC=C(C)C)(C)C	P11926	1
Agrandol	Flavanones	(2S)-5,7-dihydroxy-6-methoxy-8-(3-methylbut-2-enyl)-2-phenyl-2,3-dihydrochromen-4-one	C21H22O5	DPWCTCFTFSFYCZ-INIZCTEOSA-N	InChI=1S/C21H22O5/c1-12(2)9-10-14-18(23)21(25-3)19(24)17-15(22)11-16(26-20(14)17)13-7-5-4-6-8-13/h4-9,16,23-24H,10-11H2,1-3H3/t16-/m0/s1	COc1c(O)c(CC=C(C)C)c2c(c1O)C(=O)C[C@H](O2)c1ccccc1	P03372	1
Isosakutanetin	Flavanones	(2S)-5,7-dihydroxy-2-(4-methoxyphenyl)-2,3-dihydrochromen-4-one	C16H14O5	HMUJXQRRKBLVOO-AWEZNQCLSA-N	InChI=1S/C16H14O5/c1-20-11-4-2-9(3-5-11)14-8-13(19)16-12(18)6-10(17)7-15(16)21-14/h2-7,14,17-18H,8H2,1H3/t14-/m0/s1	COc1ccc(cc1)[C@@H]1CC(=O)c2c(O1)cc(cc2O)O	P05177,P04798,Q16678	3
Guajaverin	Flavonols	2-(3,4-dihydroxyphenyl)-5,7-dihydroxy-3-[(2S,3R,4S,5S)-3,4,5-trihydroxyoxan-2-yl]oxychromen-4-one	C20H18O11	PZZRDJXEMZMZFD-IEGSVRCHSA-N	InChI=1S/C20H18O11/c21-8-4-11(24)14-13(5-8)30-18(7-1-2-9(22)10(23)3-7)19(16(14)27)31-20-17(28)15(26)12(25)6-29-20/h1-5,12,15,17,20-26,28H,6H2/t12-,15-,17+,20-/m0/s1	Oc1cc(O)c2c(c1)oc(c(c2=O)O[C@@H]1OC[C@@H]([C@@H]([C@H]1O)O)O)c1ccc(c(c1)O)O	P18031	1
Kaempferol	Flavonols	3,5,7-trihydroxy-2-(4-hydroxyphenyl)chromen-4-one	C15H10O6	IYRMWMYZSQPJKC-UHFFFAOYSA-N	InChI=1S/C15H10O6/c16-8-3-1-7(2-4-8)15-14(20)13(19)12-10(18)5-9(17)6-11(12)21-15/h1-6,16-18,20H	Oc1ccc(cc1)c1oc2cc(O)cc(c2c(=O)c1O)O	P47989,P19784,P11474,P39748,P16050,P02545,Q07869,Q9H0H5,P49841,P11712,Q9GZU7,P19838,P06276,P33261,P29372,Q16665,P14679,P19793,P00352,P05067,O95067,P04745,P11388,O75874,P37231,Q03164,P15428,P00918,P05177,Q16236,P56817,P33527,P04040,Q13332,Q03181,P35354,P27487,Q9NUW8,P36888,Q12809,P04150,P22303,Q9NPH5,P10275,P35869,P04798,Q9Y3R4,P14061,P37059,P11309,O15296,P08183,P00533,Q04760,Q16678,B2RXH2,P04792,…	68
5,6,7,8-Tetrahydroxy-2-(4-Hydroxyphenyl)Chromen-4-One	Flavones	5,6,7,8-tetrahydroxy-2-(4-hydroxyphenyl)chromen-4-one	C15H10O7	SPZXXUUDYMHBSG-UHFFFAOYSA-N	InChI=1S/C15H10O7/c16-7-3-1-6(2-4-7)9-5-8(17)10-11(18)12(19)13(20)14(21)15(10)22-9/h1-5,16,18-21H	Oc1ccc(cc1)c1cc(=O)c2c(o1)c(O)c(c(c2O)O)O	P27695,P06746,P09923,Q9NUW8,P83916,Q07817,Q16875,Q9Y468,Q13526,Q9UIF8,P54132,P46063,Q07820,P10696,O95398,Q9Y253,O75874,O94925,P04406,Q9UBT6,P10636,P05186,Q16236,Q03164,Q9UNA4,P10253	26
Biochanin A, Dimethyl Ether	Isoflavones	5,7-dimethoxy-3-(4-methoxyphenyl)chromen-4-one	C18H16O5	PVVORTURQPBPEQ-UHFFFAOYSA-N	InChI=1S/C18H16O5/c1-20-12-6-4-11(5-7-12)14-10-23-16-9-13(21-2)8-15(22-3)17(16)18(14)19/h4-10H,1-3H3	COc1ccc(cc1)c1coc2c(c1=O)c(OC)cc(c2)OC	P27695,P00352,P08684,Q9NPD5,O15118,Q9Y6L6,O75496,Q03431,Q99714,P51151,P37840,Q96QE3	12
Catechin	Flavan-3-ols	2-(3,4-dihydroxyphenyl)-3,4-dihydro-2H-chromene-3,5,7-triol	C15H14O6	PFTAWBLQPZVEMU-UHFFFAOYSA-N	InChI=1S/C15H14O6/c16-8-4-11(18)9-6-13(20)15(21-14(9)5-8)7-1-2-10(17)12(19)3-7/h1-5,13,15-20H,6H2	Oc1cc2OC(c3ccc(c(c3)O)O)C(Cc2c(c1)O)O	P10415,P27695,P35218,O94782,Q9ULX7,P43166,Q9NUW8,P23280,P16050,P11473,P22309,Q16790,P00915,P07451,P04745,P46063,Q9Y2D0,P22748,O43570,Q03164,P10636,P15428,P00918,Q8N1Q1,B2RXH2,P07998	26
Cassiatannin A	Flavan-3-ols	</td></tr>\r\n\t\t\t\t<tr><td align=right><b>Synonyms: &nbsp</b>	C60H48O24	MIKRORKCMXNOCX-IATHEQPCSA-N	InChI=1S/C60H48O24/c61-23-13-35(72)41-39(15-23)80-54(20-2-6-27(64)32(69)10-20)51(77)44(41)48-50(76)47-45(43-37(74)18-30(67)25-17-38(75)53(81-56(25)43)19-1-5-26(63)31(68)9-19)52(78)55(21-3-7-28(65)33(70)11-21)82-57(47)49-46-42-36(73)14-24(62)16-40(42)83-60(59(46)79,84-58(48)49)22-4-8-29(66)34(71)12-22/h1-16,18,38,44-46,51-55,59,61-79H,17H2/t38-,44+,45-,46+,51+,52+,53+,54+,55+,59+,60-/m0/s1	Oc1cc(O)c2c(c1)O[C@@H]([C@@H]([C@H]2c1c(O)c2[C@@H]([C@@H](O)[C@H](Oc2c2c1O[C@@]1(Oc3c([C@H]2[C@H]1O)c(O)cc(c3)O)c1ccc(c(c1)O)O)c1ccc(c(c1)O)O)c1c(O)cc(c2c1O[C@@H]([C@H](C2)O)c1ccc(c(c1)O)O)O)O)c1ccc(c(c1)O)O	P35354	1
b"(2S)-3,5,7-Trihydroxy-2,2-Dimethyl-8-(3-Methylbut-2-Enyl)-2,6-Bichroman-4-One"	Flavanones	(2S)-5,7-dihydroxy-2-[3-hydroxy-2,2-dimethyl-8-(3-methylbut-2-enyl)-3,4-dihydrochromen-6-yl]-2,3-dihydrochromen-4-one	C25H28O6	WJBWITXUNBMVLF-AIBWNMTMSA-N	InChI=1S/C25H28O6/c1-13(2)5-6-14-7-15(8-16-9-22(29)25(3,4)31-24(14)16)20-12-19(28)23-18(27)10-17(26)11-21(23)30-20/h5,7-8,10-11,20,22,26-27,29H,6,9,12H2,1-4H3/t20-,22?/m0/s1	CC(=CCc1cc(cc2c1OC(C)(C)C(C2)O)[C@@H]1CC(=O)c2c(O1)cc(cc2O)O)C	P18031	1
Morusin	Flavones	2-(2,4-dihydroxyphenyl)-5-hydroxy-8,8-dimethyl-3-(3-methylbut-2-enyl)pyrano[2,3-h]chromen-4-one	C25H24O6	XFFOMNJIDRDDLQ-UHFFFAOYSA-N	InChI=1S/C25H24O6/c1-13(2)5-7-17-22(29)21-19(28)12-20-16(9-10-25(3,4)31-20)24(21)30-23(17)15-8-6-14(26)11-18(15)27/h5-6,8-12,26-28H,7H2,1-4H3	CC(=CCc1c(oc2c(c1=O)c(O)cc1c2C=CC(O1)(C)C)c1ccc(cc1O)O)C	P35354,P06276,P43220,P22303,P39748,O75164,P11166,P84022,Q13526,P63092,O95398,Q13148,Q99700,O75874,Q16236,P56817	16
(S)-5-Hydroxy-7-Methoxy-6,8-Dimethyl-2-Phenylchroman-4-One	Flavanones	(2S)-5-hydroxy-7-methoxy-6,8-dimethyl-2-phenyl-2,3-dihydrochromen-4-one	C18H18O4	KZNAGLGLKRUIPD-AWEZNQCLSA-N	InChI=1S/C18H18O4/c1-10-16(20)15-13(19)9-14(12-7-5-4-6-8-12)22-18(15)11(2)17(10)21-3/h4-8,14,20H,9H2,1-3H3/t14-/m0/s1	COc1c(C)c2O[C@@H](CC(=O)c2c(c1C)O)c1ccccc1	P11511	1
2-(4-Hydroxyphenyl)-3,4-Dihydro-2H-Chromene-3,5,7-Triol	Flavan-3-ols	2-(4-hydroxyphenyl)-3,4-dihydro-2H-chromene-3,5,7-triol	C15H14O5	RSYUFYQTACJFML-UHFFFAOYSA-N	InChI=1S/C15H14O5/c16-9-3-1-8(2-4-9)15-13(19)7-11-12(18)5-10(17)6-14(11)20-15/h1-6,13,15-19H,7H2	Oc1ccc(cc1)C1Oc2cc(O)cc(c2CC1O)O	Q9UBT6,Q9UM73,Q03164,P08684	4
Liquiritin	Flavanones	(2S)-7-hydroxy-2-[4-[(2S,3R,4S,5S,6R)-3,4,5-trihydroxy-6-(hydroxymethyl)oxan-2-yl]oxyphenyl]-2,3-dihydrochromen-4-one	C21H22O9	DEMKZLAVQYISIA-ZRWXNEIDSA-N	InChI=1S/C21H22O9/c22-9-17-18(25)19(26)20(27)21(30-17)28-12-4-1-10(2-5-12)15-8-14(24)13-6-3-11(23)7-16(13)29-15/h1-7,15,17-23,25-27H,8-9H2/t15-,17+,18+,19-,20+,21+/m0/s1	OC[C@H]1O[C@@H](Oc2ccc(cc2)[C@@H]2CC(=O)c3c(O2)cc(cc3)O)[C@@H]([C@H]([C@@H]1O)O)O	P18031,Q9UIF8,P04637,P07550,P07237,Q9UNA4,Q9NR56,Q96QE3	8
Gossypetin	Flavonols	2-(3,4-dihydroxyphenyl)-3,5,7,8-tetrahydroxychromen-4-one	C15H10O8	YRRAGUMVDQQZIY-UHFFFAOYSA-N	InChI=1S/C15H10O8/c16-6-2-1-5(3-7(6)17)14-13(22)12(21)10-8(18)4-9(19)11(20)15(10)23-14/h1-4,16-20,22H	Oc1cc(ccc1O)c1oc2c(O)c(O)cc(c2c(=O)c1O)O	P27695,O94782,P16050,P11473,P11511,P00352,P05067,Q9UBT6,Q03164,P15428,P10636,P53355,B2RXH2	13
Dihydrobaicalin	Flavanones	(2S,3S,4S,5R,6S)-6-[[(2S)-5,6-dihydroxy-4-oxo-2-phenyl-2,3-dihydrochromen-7-yl]oxy]-3,4,5-trihydroxyoxane-2-carboxylic acid	C21H20O11	UVNUGBQJLDGZKE-XDZPIWCFSA-N	InChI=1S/C21H20O11/c22-9-6-10(8-4-2-1-3-5-8)30-11-7-12(14(23)15(24)13(9)11)31-21-18(27)16(25)17(26)19(32-21)20(28)29/h1-5,7,10,16-19,21,23-27H,6H2,(H,28,29)/t10-,16-,17-,18+,19-,21+/m0/s1	OC(=O)[C@H]1O[C@@H](Oc2cc3O[C@@H](CC(=O)c3c(c2O)O)c2ccccc2)[C@@H]([C@H]([C@@H]1O)O)O	P34969	1
(2R,3R)-Lespedezaflavanone C	Flavanonol	(2R,3R)-3,5,7-trihydroxy-2-[4-hydroxy-3-(3-methylbut-2-enyl)phenyl]-8-(3-methylbut-2-enyl)-2,3-dihydrochromen-4-one	C25H28O6	WFHBGCVPESHDKZ-BJKOFHAPSA-N	InChI=1S/C25H28O6/c1-13(2)5-7-15-11-16(8-10-18(15)26)24-23(30)22(29)21-20(28)12-19(27)17(25(21)31-24)9-6-14(3)4/h5-6,8,10-12,23-24,26-28,30H,7,9H2,1-4H3/t23-,24+/m0/s1	CC(=CCc1cc(ccc1O)[C@H]1Oc2c(CC=C(C)C)c(O)cc(c2C(=O)[C@@H]1O)O)C	P11511	1
b"3,5,6,7,8,3,4-Heptamethoxyflavone"	Flavonols	2-(3,4-dimethoxyphenyl)-3,5,6,7,8-pentamethoxychromen-4-one	C22H24O9	SSXJHQZOHUYEGD-UHFFFAOYSA-N	InChI=1S/C22H24O9/c1-24-12-9-8-11(10-13(12)25-2)16-19(27-4)15(23)14-17(26-3)20(28-5)22(30-7)21(29-6)18(14)31-16/h8-10H,1-7H3	COc1cc(ccc1OC)c1oc2c(OC)c(OC)c(c(c2c(=O)c1OC)OC)OC	Q9BUF5,Q08493,Q9UNQ0,P08183	4
Icariin	Flavonols	5-hydroxy-2-(4-methoxyphenyl)-8-(3-methylbut-2-enyl)-7-[(2S,3R,4S,5S,6R)-3,4,5-trihydroxy-6-(hydroxymethyl)oxan-2-yl]oxy-3-[(2S,3R,4R,5R,6S)-3,4,5-trihydroxy-6-methyloxan-2-yl]oxychromen-4-one	C33H40O15	TZJALUIVHRYQQB-XLRXWWTNSA-N	InChI=1S/C33H40O15/c1-13(2)5-10-17-19(45-33-28(42)26(40)23(37)20(12-34)46-33)11-18(35)21-24(38)31(48-32-27(41)25(39)22(36)14(3)44-32)29(47-30(17)21)15-6-8-16(43-4)9-7-15/h5-9,11,14,20,22-23,25-28,32-37,39-42H,10,12H2,1-4H3/t14-,20+,22-,23+,25+,26-,27+,28+,32-,33+/m0/s1	COc1ccc(cc1)c1oc2c(CC=C(C)C)c(O[C@@H]3O[C@H](CO)[C@H]([C@@H]([C@H]3O)O)O)cc(c2c(=O)c1O[C@@H]1O[C@@H](C)[C@@H]([C@H]([C@H]1O)O)O)O	P27695,Q9NPD5,P06746,Q9Y6L6,O76074,P51160,O75874	7
2-(3,4-Dimethoxyphenyl)-3-Hydroxy-5,7-Dimethoxychromen-4-One	Flavonols	2-(3,4-dimethoxyphenyl)-3-hydroxy-5,7-dimethoxychromen-4-one	C19H18O7	AAASNKNLMQBKFV-UHFFFAOYSA-N	InChI=1S/C19H18O7/c1-22-11-8-14(25-4)16-15(9-11)26-19(18(21)17(16)20)10-5-6-12(23-2)13(7-10)24-3/h5-9,21H,1-4H3	COc1cc(OC)c2c(c1)oc(c(c2=O)O)c1ccc(c(c1)OC)OC	Q9BUF5,P55210,Q9UNQ0,P04637,P02545,P10636,P08684,P33527,B2RXH2	9
Auriculasin	Isoflavones	7-(3,4-dihydroxyphenyl)-5-hydroxy-2,2-dimethyl-10-(3-methylbut-2-enyl)pyrano[3,2-g]chromen-6-one	C25H24O6	PSEBCAMYGWGJMH-UHFFFAOYSA-N	InChI=1S/C25H24O6/c1-13(2)5-7-16-23-15(9-10-25(3,4)31-23)21(28)20-22(29)17(12-30-24(16)20)14-6-8-18(26)19(27)11-14/h5-6,8-12,26-28H,7H2,1-4H3	CC(=CCc1c2OC(C)(C)C=Cc2c(c2c1occ(c2=O)c1ccc(c(c1)O)O)O)C	P18031	1
Rataniaphenol I	Others	5-methoxy-2-[5-[(E)-prop-1-enyl]-1-benzofuran-2-yl]phenol	C18H16O3	VSRAHYZSNLDBKG-ONEGZZNKSA-N	InChI=1S/C18H16O3/c1-3-4-12-5-8-17-13(9-12)10-18(21-17)15-7-6-14(20-2)11-16(15)19/h3-11,19H,1-2H3/b4-3+	C/C=C/c1ccc2c(c1)cc(o2)c1ccc(cc1O)OC	O14684	1
Kaempferol-3-O-2-O-Acetyl-Alpha-L-Rhamnopyranoside	Flavonols	[(2S,3R,4R,5S,6S)-2-[5,7-dihydroxy-2-(4-hydroxyphenyl)-4-oxochromen-3-yl]oxy-3,5-dihydroxy-6-methyloxan-4-yl] acetate	C23H22O11	APRVHMRKRPHQLM-NDUFOHEISA-N	InChI=1S/C23H22O11/c1-9-17(28)21(32-10(2)24)19(30)23(31-9)34-22-18(29)16-14(27)7-13(26)8-15(16)33-20(22)11-3-5-12(25)6-4-11/h3-9,17,19,21,23,25-28,30H,1-2H3/t9-,17-,19+,21+,23-/m0/s1	CC(=O)O[C@H]1[C@@H](O)[C@@H](O[C@H]([C@@H]1O)C)Oc1c(oc2c(c1=O)c(O)cc(c2)O)c1ccc(cc1)O	P10635,P08684	2
b"7,3,4-Trimethoxyflavone"	Flavones	2-(3,4-dimethoxyphenyl)-7-methoxychromen-4-one	C18H16O5	VSFZYCDPDWSYSS-UHFFFAOYSA-N	InChI=1S/C18H16O5/c1-20-12-5-6-13-14(19)10-16(23-17(13)9-12)11-4-7-15(21-2)18(8-11)22-3/h4-10H,1-3H3	COc1ccc2c(c1)oc(cc2=O)c1ccc(c(c1)OC)OC	P08183	1
Neorautenol	Others	</td></tr>\r\n\t\t\t\t<tr><td align=right><b>Synonyms: &nbsp</b>	C20H18O4	OGFFMQWYZCTXCM-KXBFYZLASA-N	InChI=1S/C20H18O4/c1-20(2)6-5-11-7-14-17(9-16(11)24-20)22-10-15-13-4-3-12(21)8-18(13)23-19(14)15/h3-9,15,19,21H,10H2,1-2H3/t15-,19-/m0/s1	Oc1ccc2c(c1)O[C@@H]1[C@H]2COc2c1cc1C=CC(Oc1c2)(C)C	P18031	1
Calycosin-7-O-Beta-D-Glucoside	Isoflavones	3-(3-hydroxy-4-methoxyphenyl)-7-[(2S,3R,4S,5S,6R)-3,4,5-trihydroxy-6-(hydroxymethyl)oxan-2-yl]oxychromen-4-one	C22H22O10	WACBUPFEGWUGPB-MIUGBVLSSA-N	InChI=1S/C22H22O10/c1-29-15-5-2-10(6-14(15)24)13-9-30-16-7-11(3-4-12(16)18(13)25)31-22-21(28)20(27)19(26)17(8-23)32-22/h2-7,9,17,19-24,26-28H,8H2,1H3/t17-,19-,20+,21-,22-/m1/s1	OC[C@H]1O[C@@H](Oc2ccc3c(c2)occ(c3=O)c2ccc(c(c2)O)OC)[C@@H]([C@H]([C@@H]1O)O)O	P01375,P60568	2
5,7-Dihydroxy-2-(4-Hydroxyphenyl)-2,3-Dihydrochromen-4-One	Flavanones	5,7-dihydroxy-2-(4-hydroxyphenyl)-2,3-dihydrochromen-4-one	C15H12O5	FTVWIRXFELQLPI-UHFFFAOYSA-N	InChI=1S/C15H12O5/c16-9-3-1-8(2-4-9)13-7-12(19)15-11(18)5-10(17)6-14(15)20-13/h1-6,13,16-18H,7H2	Oc1ccc(cc1)C1CC(=O)c2c(O1)cc(cc2O)O	P27695,P24941,P04062,Q03164,P08684,O75496,P18054,P09917,Q9UNA4	9
Chrysosplenol D	Flavonols	2-(3,4-dihydroxyphenyl)-5-hydroxy-3,6,7-trimethoxychromen-4-one	C18H16O8	BYWLLSQTJBXAPV-UHFFFAOYSA-N	InChI=1S/C18H16O8/c1-23-12-7-11-13(14(21)17(12)24-2)15(22)18(25-3)16(26-11)8-4-5-9(19)10(20)6-8/h4-7,19-21H,1-3H3	COc1c(oc2c(c1=O)c(O)c(c(c2)OC)OC)c1ccc(c(c1)O)O	P15121	1
Glabridin	Others	4-[(3R)-8,8-dimethyl-3,4-dihydro-2H-pyrano[2,3-f]chromen-3-yl]benzene-1,3-diol	C20H20O4	LBQIJVLKGVZRIW-ZDUSSCGKSA-N	InChI=1S/C20H20O4/c1-20(2)8-7-16-18(24-20)6-3-12-9-13(11-23-19(12)16)15-5-4-14(21)10-17(15)22/h3-8,10,13,21-22H,9,11H2,1-2H3/t13-/m0/s1	Oc1ccc(c(c1)O)[C@@H]1COc2c(C1)ccc1c2C=CC(O1)(C)C	P18031,P43220,O75164,P08684,O75496,Q16236,P84022,P37840,Q13148	9
Ohioensin A	Others	</td></tr>\r\n\t\t\t\t<tr><td align=right><b>Synonyms: &nbsp</b>	C23H16O5	DBGJQYIYUBGFLT-GQIHDASDSA-N	InChI=1S/C23H16O5/c24-10-5-6-12-14(7-10)23-20-13(11-3-1-2-4-18(11)28-23)8-15(25)21-17(27)9-16(26)19(12)22(20)21/h1-7,9,13,20,23-24,26-27H,8H2/t13-,20+,23+/m1/s1	Oc1ccc2c(c1)[C@@H]1Oc3ccccc3[C@@H]3[C@H]1c1c2c(O)cc(c1C(=O)C3)O	P18031	1
3-(3,4-Dihydroxyphenyl)-7-Hydroxychromen-4-One	Isoflavones	3-(3,4-dihydroxyphenyl)-7-hydroxychromen-4-one	C15H10O5	DDKGKOOLFLYZDL-UHFFFAOYSA-N	InChI=1S/C15H10O5/c16-9-2-3-10-14(6-9)20-7-11(15(10)19)8-1-4-12(17)13(18)5-8/h1-7,16-18H	Oc1ccc2c(c1)occ(c2=O)c1ccc(c(c1)O)O	P53355,P47989,P14174,P37231	4
b"(2S)-5,7,8-Trihydroxy-2-(Hydroxymethyl)-2-Methyl-2,6-Bichroman-4-One"	Flavanones	(2S)-5,7-dihydroxy-2-[8-hydroxy-2-(hydroxymethyl)-2-methylchromen-6-yl]-2,3-dihydrochromen-4-one	C20H18O7	PNMOOGSNXGIKSQ-DJZRFWRSSA-N	InChI=1S/C20H18O7/c1-20(9-21)3-2-10-4-11(5-15(25)19(10)27-20)16-8-14(24)18-13(23)6-12(22)7-17(18)26-16/h2-7,16,21-23,25H,8-9H2,1H3/t16-,20?/m0/s1	OCC1(C)C=Cc2c(O1)c(O)cc(c2)[C@@H]1CC(=O)c2c(O1)cc(cc2O)O	P18031	1
Epicoccolide	Others	2-(2-formyl-3,4,5-trihydroxy-6-methylphenyl)-6,7-dihydroxy-5-methyl-1-benzofuran-4-carbaldehyde	C18H14O8	HTCVSLIHSFBUEL-UHFFFAOYSA-N	InChI=1S/C18H14O8/c1-6-9(4-19)8-3-11(26-18(8)17(25)13(6)21)12-7(2)14(22)16(24)15(23)10(12)5-20/h3-5,21-25H,1-2H3	O=Cc1c(c2cc3c(o2)c(O)c(c(c3C=O)C)O)c(C)c(c(c1O)O)O	P08069,P51955,O60285,P31749,Q9HC98,P35968,P08581,Q02750,P53350,Q16512,Q969S8,P12931,Q05397,Q969S8,Q9UBN7,Q13547,Q92769,P11309,Q96GD4,O15379,Q9UM73,P30530,Q9BY41,Q96DB2	24
6-[2-(3,4-Dihydroxyphenyl)-5,7-Dihydroxy-4-Oxochromen-3-Yl]Oxy-3,4,5-Trihydroxyoxane-2-Carboxylic Acid	Flavonols	6-[2-(3,4-dihydroxyphenyl)-5,7-dihydroxy-4-oxochromen-3-yl]oxy-3,4,5-trihydroxyoxane-2-carboxylic acid	C21H18O13	DUBCCGAQYVUYEU-UHFFFAOYSA-N	InChI=1S/C21H18O13/c22-7-4-10(25)12-11(5-7)32-17(6-1-2-8(23)9(24)3-6)18(13(12)26)33-21-16(29)14(27)15(28)19(34-21)20(30)31/h1-5,14-16,19,21-25,27-29H,(H,30,31)	Oc1cc(O)c2c(c1)oc(c(c2=O)OC1OC(C(=O)O)C(C(C1O)O)O)c1ccc(c(c1)O)O	P27695,P06746,P09923,O75164,Q03431,P00352,P02545,Q13526,Q9UIF8,P10696,Q9UNA4,Q9NR56,Q9Y253,Q9UBT6,Q14191,P10636,B2RXH2,P10253	18
b"4,7-O-Methylamentoflavone"	Flavones	8-[5-(5,7-dihydroxy-4-oxochromen-2-yl)-2-methoxyphenyl]-5-hydroxy-2-(4-hydroxyphenyl)-7-methoxychromen-4-one	C32H22O10	OVCFMRWVQJAWDY-UHFFFAOYSA-N	InChI=1S/C32H22O10/c1-39-24-8-5-16(26-12-21(36)30-20(35)10-18(34)11-28(30)41-26)9-19(24)29-27(40-2)14-23(38)31-22(37)13-25(42-32(29)31)15-3-6-17(33)7-4-15/h3-14,33-35,38H,1-2H3	COc1ccc(cc1c1c(OC)cc(c2c1oc(cc2=O)c1ccc(cc1)O)O)c1cc(=O)c2c(o1)cc(cc2O)O	P56817	1
Isolupabigenin	Isoflavones	5,7-dihydroxy-3-[4-hydroxy-3-(3-methylbut-2-enyl)phenyl]-8-(3-methylbut-2-enyl)chromen-4-one	C25H26O5	FXJPTJQFJYNFKC-UHFFFAOYSA-N	InChI=1S/C25H26O5/c1-14(2)5-7-17-11-16(8-10-20(17)26)19-13-30-25-18(9-6-15(3)4)21(27)12-22(28)23(25)24(19)29/h5-6,8,10-13,26-28H,7,9H2,1-4H3	CC(=CCc1cc(ccc1O)c1coc2c(c1=O)c(O)cc(c2CC=C(C)C)O)C	P18031	1
Naringin	Flavanones	(2S)-7-[(2S,3R,4S,5S,6R)-4,5-dihydroxy-6-(hydroxymethyl)-3-[(2S,3R,4R,5R,6S)-3,4,5-trihydroxy-6-methyloxan-2-yl]oxyoxan-2-yl]oxy-5-hydroxy-2-(4-hydroxyphenyl)-2,3-dihydrochromen-4-one	C27H32O14	DFPMSGMNTNDNHN-ZPHOTFPESA-N	InChI=1S/C27H32O14/c1-10-20(32)22(34)24(36)26(37-10)41-25-23(35)21(33)18(9-28)40-27(25)38-13-6-14(30)19-15(31)8-16(39-17(19)7-13)11-2-4-12(29)5-3-11/h2-7,10,16,18,20-30,32-36H,8-9H2,1H3/t10-,16-,18+,20-,21+,22+,23-,24+,25+,26-,27+/m0/s1	OC[C@H]1O[C@@H](Oc2cc(O)c3c(c2)O[C@@H](CC3=O)c2ccc(cc2)O)[C@@H]([C@H]([C@@H]1O)O)O[C@@H]1O[C@@H](C)[C@@H]([C@H]([C@H]1O)O)O	O94782,Q9NPD5,Q9Y6L6,P49841,P83916,P22309,P11511,O94956,O75496,Q13148,O75874,P18031,P61088,Q9Y251,P11308,Q96KQ7	16
Apigetrin	Flavones	5-hydroxy-2-(4-hydroxyphenyl)-7-[(2S,3R,4S,5S,6R)-3,4,5-trihydroxy-6-(hydroxymethyl)oxan-2-yl]oxychromen-4-one	C21H20O10	KMOUJOKENFFTPU-QNDFHXLGSA-N	InChI=1S/C21H20O10/c22-8-16-18(26)19(27)20(28)21(31-16)29-11-5-12(24)17-13(25)7-14(30-15(17)6-11)9-1-3-10(23)4-2-9/h1-7,16,18-24,26-28H,8H2/t16-,18-,19+,20-,21-/m1/s1	OC[C@H]1O[C@@H](Oc2cc(O)c3c(c2)oc(cc3=O)c2ccc(cc2)O)[C@@H]([C@H]([C@@H]1O)O)O	Q9NPD5,Q9Y6L6,P01375	3
(-)-Epicatechin	Flavan-3-ols	(2R,3R)-2-(3,4-dihydroxyphenyl)-3,4-dihydro-2H-chromene-3,5,7-triol	C15H14O6	PFTAWBLQPZVEMU-UKRRQHHQSA-N	InChI=1S/C15H14O6/c16-8-4-11(18)9-6-13(20)15(21-14(9)5-8)7-1-2-10(17)12(19)3-7/h1-5,13,15-20H,6H2/t13-,15-/m1/s1	Oc1cc2O[C@H](c3ccc(c(c3)O)O)[C@@H](Cc2c(c1)O)O	P27695,P19838,Q9NPD5,Q9Y6L6,P00734,P84022,P49327,P16473,P04745,Q99714,P07711,P10696,Q9UNA4,Q9H0H5,Q03164,P08684,P10636,Q9UBT6,P05186,Q16236,Q96KQ7,B2RXH2,P10253,P07998	24
Echrenone B10	Isoflavones	4-hydroxy-6-(4-hydroxyphenyl)-2-(2-hydroxypropan-2-yl)-9-(3-methylbut-2-enyl)-2,3-dihydrofuro[3,2-g]chromen-5-one	C25H26O6	LKFQSODZCVNSSG-UHFFFAOYSA-N	InChI=1S/C25H26O6/c1-13(2)5-10-16-23-17(11-19(31-23)25(3,4)29)21(27)20-22(28)18(12-30-24(16)20)14-6-8-15(26)9-7-14/h5-9,12,19,26-27,29H,10-11H2,1-4H3	CC(=CCc1c2OC(Cc2c(c2c1occ(c2=O)c1ccc(cc1)O)O)C(O)(C)C)C	P18031	1
5-(7-Hydroxy-Chroman-2-Yl)-3-(3-Methyl-But-2-Enyl)-Benzene-1,2-Diol	Others	5-(7-hydroxy-3,4-dihydro-2H-chromen-2-yl)-3-(3-methylbut-2-enyl)benzene-1,2-diol	C20H22O4	MSTNVJDHQJXVFI-UHFFFAOYSA-N	InChI=1S/C20H22O4/c1-12(2)3-4-14-9-15(10-17(22)20(14)23)18-8-6-13-5-7-16(21)11-19(13)24-18/h3,5,7,9-11,18,21-23H,4,6,8H2,1-2H3	CC(=CCc1cc(cc(c1O)O)C1CCc2c(O1)cc(cc2)O)C	P18031	1
Eupafolin	Flavones	2-(3,4-dihydroxyphenyl)-5,7-dihydroxy-6-methoxychromen-4-one	C16H12O7	FHHSEFRSDKWJKJ-UHFFFAOYSA-N	InChI=1S/C16H12O7/c1-22-16-11(20)6-13-14(15(16)21)10(19)5-12(23-13)7-2-3-8(17)9(18)4-7/h2-6,17-18,20-21H,1H3	COc1c(O)cc2c(c1O)c(=O)cc(o2)c1ccc(c(c1)O)O	P27695,P04062,P39748,P55789,O75164,O15118,Q9HC16,B2RXH2,P55212,P04745,P54132,P46063,Q9UNA4,P10828,Q96QE3,Q9Y253,Q03164,Q9UBT6,P10636,P11021	20
Garbanzol	Flavanonol	(2R,3R)-3,7-dihydroxy-2-(4-hydroxyphenyl)-2,3-dihydrochromen-4-one	C15H12O5	VRTGGIJPIYOHGT-LSDHHAIUSA-N	InChI=1S/C15H12O5/c16-9-3-1-8(2-4-9)15-14(19)13(18)11-6-5-10(17)7-12(11)20-15/h1-7,14-17,19H/t14-,15+/m0/s1	Oc1ccc(cc1)[C@H]1Oc2cc(O)ccc2C(=O)[C@@H]1O	P11511	1
Glyasperin D	Others	4-[(3R)-5,7-dimethoxy-6-(3-methylbut-2-enyl)-3,4-dihydro-2H-chromen-3-yl]benzene-1,3-diol	C22H26O5	DDMAUIOCNQXFHL-AWEZNQCLSA-N	InChI=1S/C22H26O5/c1-13(2)5-7-17-20(25-3)11-21-18(22(17)26-4)9-14(12-27-21)16-8-6-15(23)10-19(16)24/h5-6,8,10-11,14,23-24H,7,9,12H2,1-4H3/t14-/m0/s1	COc1c2C[C@@H](COc2cc(c1CC=C(C)C)OC)c1ccc(cc1O)O	P14679,P39748,O75164,Q99700,O75496,P84022,P37840	7
b"4-Hydroxy-5,7-Dimethoxyisoflavone"	Isoflavones	3-(4-hydroxyphenyl)-5,7-dimethoxychromen-4-one	C17H14O5	YZBVKMUAJDLNMZ-UHFFFAOYSA-N	InChI=1S/C17H14O5/c1-20-12-7-14(21-2)16-15(8-12)22-9-13(17(16)19)10-3-5-11(18)6-4-10/h3-9,18H,1-2H3	COc1cc(OC)cc2c1c(=O)c(co2)c1ccc(cc1)O	P18031	1
Avicularin	Flavonols	3-[(2S,3R,4R,5S)-3,4-dihydroxy-5-(hydroxymethyl)oxolan-2-yl]oxy-2-(3,4-dihydroxyphenyl)-5,7-dihydroxychromen-4-one	C20H18O11	BDCDNTVZSILEOY-UXYNSRGZSA-N	InChI=1S/C20H18O11/c21-6-13-15(26)17(28)20(30-13)31-19-16(27)14-11(25)4-8(22)5-12(14)29-18(19)7-1-2-9(23)10(24)3-7/h1-5,13,15,17,20-26,28H,6H2/t13-,15-,17+,20-/m0/s1	OC[C@@H]1O[C@H]([C@@H]([C@H]1O)O)Oc1c(oc2c(c1=O)c(O)cc(c2)O)c1ccc(c(c1)O)O	P15121	1
Homopterocarpin	Others	(6aR,11aR)-3,9-dimethoxy-6a,11a-dihydro-6H-[1]benzofuro[3,2-c]chromene	C17H16O4	VPGIGLKLCFOWDN-YOEHRIQHSA-N	InChI=1S/C17H16O4/c1-18-10-4-6-13-15(7-10)20-9-14-12-5-3-11(19-2)8-16(12)21-17(13)14/h3-8,14,17H,9H2,1-2H3/t14-,17-/m0/s1	COc1ccc2c(c1)OC[C@@H]1[C@H]2Oc2c1ccc(c2)OC	Q9NPD5,Q9Y6L6	2
5,7-Dihydroxy-2-(4-Hydroxy-3-Methoxyphenyl)-3-[(2S,3R,4S,5S,6R)-3,4,5-Trihydroxy-6-[[(3R,4R,5R,6S)-3,4,5-Trihydroxy-6-Methyloxan-2-Yl]Oxymethyl]Oxan-2-Yl]Oxychromen-4-One	Flavonols	5,7-dihydroxy-2-(4-hydroxy-3-methoxyphenyl)-3-[(2S,3R,4S,5S,6R)-3,4,5-trihydroxy-6-[[(3R,4R,5R,6S)-3,4,5-trihydroxy-6-methyloxan-2-yl]oxymethyl]oxan-2-yl]oxychromen-4-one	C28H32O16	UIDGLYUNOUKLBM-PRGLGRKWSA-N	InChI=1S/C28H32O16/c1-9-18(32)21(35)23(37)27(41-9)40-8-16-19(33)22(36)24(38)28(43-16)44-26-20(34)17-13(31)6-11(29)7-15(17)42-25(26)10-3-4-12(30)14(5-10)39-2/h3-7,9,16,18-19,21-24,27-33,35-38H,8H2,1-2H3/t9-,16+,18-,19+,21+,22-,23+,24+,27?,28-/m0/s1	COc1cc(ccc1O)c1oc2cc(O)cc(c2c(=O)c1O[C@@H]1O[C@H](COC2O[C@@H](C)[C@@H]([C@H]([C@H]2O)O)O)[C@H]([C@@H]([C@H]1O)O)O)O	P43220,O75496,P07237,Q9UNA4,Q96QE3	5
Calycosin	Isoflavones	7-hydroxy-3-(3-hydroxy-4-methoxyphenyl)chromen-4-one	C16H12O5	ZZAJQOPSWWVMBI-UHFFFAOYSA-N	InChI=1S/C16H12O5/c1-20-14-5-2-9(6-13(14)18)12-8-21-15-7-10(17)3-4-11(15)16(12)19/h2-8,17-18H,1H3	COc1ccc(cc1O)c1coc2c(c1=O)ccc(c2)O	P06746,P51151,P38398,B2RXH2,Q96QE3,Q9UBT6,P10636,Q9UNA4	8
Kushenol K	Flavanonol	(2R,3S)-2-(2,4-dihydroxyphenyl)-3,7-dihydroxy-8-[(2R)-5-hydroxy-5-methyl-2-prop-1-en-2-ylhexyl]-5-methoxy-2,3-dihydrochromen-4-one	C26H32O8	YWHHRFNOJTVNBI-LBEFLKDASA-N	InChI=1S/C26H32O8/c1-13(2)14(8-9-26(3,4)32)10-17-19(29)12-20(33-5)21-22(30)23(31)25(34-24(17)21)16-7-6-15(27)11-18(16)28/h6-7,11-12,14,23,25,27-29,31-32H,1,8-10H2,2-5H3/t14-,23-,25-/m1/s1	COc1cc(O)c(c2c1C(=O)[C@@H](O)[C@H](O2)c1ccc(cc1O)O)C[C@H](C(=C)C)CCC(O)(C)C	P31639,P13866	2
</td></tr>\r\n\t\t\t\t<tr><td align=right><b>IUPAC Name: &nbsp</b>	Flavones	2-(4-bromophenyl)chromen-4-one	C15H9BrO2	URZUAHXELZUWFE-UHFFFAOYSA-N	InChI=1S/C15H9BrO2/c16-11-7-5-10(6-8-11)15-9-13(17)12-3-1-2-4-14(12)18-15/h1-9H	Brc1ccc(cc1)c1cc(=O)c2c(o1)cccc2	O95271	1
Tephrocandidin A	Flavanones	(2S)-7-hydroxy-8-[(Z)-3-hydroxy-3-methylbut-1-enyl]-5-methoxy-2-phenyl-2,3-dihydrochromen-4-one	C21H22O5	YSYPNKZOQYHUSV-IBSYWUHOSA-N	InChI=1S/C21H22O5/c1-21(2,24)10-9-14-15(22)11-18(25-3)19-16(23)12-17(26-20(14)19)13-7-5-4-6-8-13/h4-11,17,22,24H,12H2,1-3H3/b10-9-/t17-/m0/s1	COc1cc(O)c(c2c1C(=O)C[C@H](O2)c1ccccc1)/C=CC(O)(C)C	P03372	1
b"3-O-Methyldiplacone"	Flavanones	(2S)-6-[(2E)-3,7-dimethylocta-2,6-dienyl]-5,7-dihydroxy-2-(4-hydroxy-3-methoxyphenyl)-2,3-dihydrochromen-4-one	C26H30O6	PMKNILHJZILHLN-AGBQBWRISA-N	InChI=1S/C26H30O6/c1-15(2)6-5-7-16(3)8-10-18-20(28)13-24-25(26(18)30)21(29)14-22(32-24)17-9-11-19(27)23(12-17)31-4/h6,8-9,11-13,22,27-28,30H,5,7,10,14H2,1-4H3/b16-8+/t22-/m0/s1	COc1cc(ccc1O)[C@@H]1CC(=O)c2c(O1)cc(c(c2O)C/C=C(/CCC=C(C)C)C)O	P22303	1
b"4-Methoxyflavone"	Flavones	2-(4-methoxyphenyl)chromen-4-one	C16H12O3	OMICQBVLCVRFGN-UHFFFAOYSA-N	InChI=1S/C16H12O3/c1-18-12-8-6-11(7-9-12)16-10-14(17)13-4-2-3-5-15(13)19-16/h2-10H,1H3	COc1ccc(cc1)c1cc(=O)c2c(o1)cccc2	P04062,O94782,Q92830,Q9NPD5,Q9Y6L6,Q16637,Q96P20,P51151,P27338,P06280,P38398,O15118,P04637,P21397,Q03431,P02545,Q99714,P10828,Q96QE3,P15428,P10636,O95271,B2RXH2,P51843	24
Kaempferol-3-O-(2,4-Di-O-Acetyl-Alpha-L-Rhamnopyranoside)	Flavonols	[(2S,3R,4R,5R,6S)-5-acetyloxy-6-[5,7-dihydroxy-2-(4-hydroxyphenyl)-4-oxochromen-3-yl]oxy-4-hydroxy-2-methyloxan-3-yl] acetate	C25H24O12	VWQNZPASHLNLEM-WKSZPJAWSA-N	InChI=1S/C25H24O12/c1-10-21(34-11(2)26)20(32)24(35-12(3)27)25(33-10)37-23-19(31)18-16(30)8-15(29)9-17(18)36-22(23)13-4-6-14(28)7-5-13/h4-10,20-21,24-25,28-30,32H,1-3H3/t10-,20+,21-,24+,25-/m0/s1	CC(=O)O[C@H]1[C@@H](O[C@H]([C@@H]([C@H]1O)OC(=O)C)C)Oc1c(oc2c(c1=O)c(O)cc(c2)O)c1ccc(cc1)O	P08684,P10635	2
5,6-Dihydroxy-2-Phenyl-7-[(2S,3R,4S,5S,6R)-3,4,5-Trihydroxy-6-(Hydroxymethyl)Oxan-2-Yl]Oxychromen-4-One	Flavones	5,6-dihydroxy-2-phenyl-7-[(2S,3R,4S,5S,6R)-3,4,5-trihydroxy-6-(hydroxymethyl)oxan-2-yl]oxychromen-4-one	C21H20O10	IPQKDIRUZHOIOM-IAAKTDFRSA-N	InChI=1S/C21H20O10/c22-8-14-17(25)19(27)20(28)21(31-14)30-13-7-12-15(18(26)16(13)24)10(23)6-11(29-12)9-4-2-1-3-5-9/h1-7,14,17,19-22,24-28H,8H2/t14-,17-,19+,20-,21-/m1/s1	OC[C@H]1O[C@@H](Oc2cc3oc(cc(=O)c3c(c2O)O)c2ccccc2)[C@@H]([C@H]([C@@H]1O)O)O	P27695,Q9UBT6,Q03164,P15428,B2RXH2,Q9NUW8,Q99714,P11021	8
Heveaflavone	Flavones	5-hydroxy-8-[2-hydroxy-5-(5-hydroxy-7-methoxy-4-oxochromen-2-yl)phenyl]-7-methoxy-2-(4-methoxyphenyl)chromen-4-one	C33H24O10	NXPAGAZHSWSUFJ-UHFFFAOYSA-N	InChI=1S/C33H24O10/c1-39-18-7-4-16(5-8-18)26-14-24(37)32-25(38)15-28(41-3)30(33(32)43-26)20-10-17(6-9-21(20)34)27-13-23(36)31-22(35)11-19(40-2)12-29(31)42-27/h4-15,34-35,38H,1-3H3	COc1ccc(cc1)c1cc(=O)c2c(o1)c(c(cc2O)OC)c1cc(ccc1O)c1cc(=O)c2c(o1)cc(cc2O)OC	P56817	1
Broussoflavonol F	Flavonols	3,5,7-trihydroxy-2-[4-hydroxy-3-(3-methylbut-2-enyl)phenyl]-8-(3-methylbut-2-enyl)chromen-4-one	C25H26O6	KNMMNUQOUANAJS-UHFFFAOYSA-N	InChI=1S/C25H26O6/c1-13(2)5-7-15-11-16(8-10-18(15)26)24-23(30)22(29)21-20(28)12-19(27)17(25(21)31-24)9-6-14(3)4/h5-6,8,10-12,26-28,30H,7,9H2,1-4H3	CC(=CCc1cc(ccc1O)c1oc2c(CC=C(C)C)c(O)cc(c2c(=O)c1O)O)C	P11511	1
2-(4-Methoxyphenyl)-6-Methylchromen-4-One	Flavones	2-(4-methoxyphenyl)-6-methylchromen-4-one	C17H14O3	YTSXWTNKPYQBGN-UHFFFAOYSA-N	InChI=1S/C17H14O3/c1-11-3-8-16-14(9-11)15(18)10-17(20-16)12-4-6-13(19-2)7-5-12/h3-10H,1-2H3	COc1ccc(cc1)c1cc(=O)c2c(o1)ccc(c2)C	P19784	1
Tupichinol C	Others	(2R)-2-(4-hydroxyphenyl)-3,4-dihydro-2H-chromen-7-ol	C15H14O3	YXMLGIGHGPSEKA-CQSZACIVSA-N	InChI=1S/C15H14O3/c16-12-5-1-10(2-6-12)14-8-4-11-3-7-13(17)9-15(11)18-14/h1-3,5-7,9,14,16-17H,4,8H2/t14-/m1/s1	Oc1ccc(cc1)[C@H]1CCc2c(O1)cc(cc2)O	P03372,Q92731	2
Millewanin G	Isoflavones	3-(3,4-dihydroxyphenyl)-5,7-dihydroxy-6-(2-hydroxy-3-methylbut-3-enyl)-8-(3-methylbut-2-enyl)chromen-4-one	C25H26O7	FSQKKJIBNQATIX-UHFFFAOYSA-N	InChI=1S/C25H26O7/c1-12(2)5-7-15-22(29)16(10-19(27)13(3)4)23(30)21-24(31)17(11-32-25(15)21)14-6-8-18(26)20(28)9-14/h5-6,8-9,11,19,26-30H,3,7,10H2,1-2,4H3	CC(=CCc1c(O)c(CC(C(=C)C)O)c(c2c1occ(c2=O)c1ccc(c(c1)O)O)O)C	P03372	1
Morusinol	Flavones	2-(2,4-dihydroxyphenyl)-5-hydroxy-3-(3-hydroxy-3-methylbutyl)-8,8-dimethylpyrano[2,3-h]chromen-4-one	C25H26O7	AFOKZNPZDXHDHD-UHFFFAOYSA-N	InChI=1S/C25H26O7/c1-24(2,30)9-7-16-21(29)20-18(28)12-19-15(8-10-25(3,4)32-19)23(20)31-22(16)14-6-5-13(26)11-17(14)27/h5-6,8,10-12,26-28,30H,7,9H2,1-4H3	Oc1ccc(c(c1)O)c1oc2c3C=CC(Oc3cc(c2c(=O)c1CCC(O)(C)C)O)(C)C	P43220,P22303,O75164,O75496,P06276,Q8IUX4,P84022,P56817,Q99700,O75874	10
Demethyleucomin	Others	(3E)-5,7-dihydroxy-3-[(4-hydroxyphenyl)methylidene]chromen-4-one	C16H12O5	PKCWSPYCHMNVKB-BJMVGYQFSA-N	InChI=1S/C16H12O5/c17-11-3-1-9(2-4-11)5-10-8-21-14-7-12(18)6-13(19)15(14)16(10)20/h1-7,17-19H,8H2/b10-5+	Oc1ccc(cc1)/C=C/1COc2c(C1=O)c(O)cc(c2)O	P21397,P27338	2
Hinokiflavone	Flavones	6-[4-(5,7-dihydroxy-4-oxochromen-2-yl)phenoxy]-5,7-dihydroxy-2-(4-hydroxyphenyl)chromen-4-one	C30H18O10	WTDHMFBJQJSTMH-UHFFFAOYSA-N	InChI=1S/C30H18O10/c31-16-5-1-14(2-6-16)24-12-21(35)28-26(40-24)13-22(36)30(29(28)37)38-18-7-3-15(4-8-18)23-11-20(34)27-19(33)9-17(32)10-25(27)39-23/h1-13,31-33,36-37H	Oc1ccc(cc1)c1cc(=O)c2c(o1)cc(c(c2O)Oc1ccc(cc1)c1cc(=O)c2c(o1)cc(cc2O)O)O	P56817,P43235	2
b"Kaempferol-3-O-(2,6-Di-E-P-Coumaroyl)-Beta-Glucopyranoside"	Flavonols	[(2R,3S,4S,5R,6S)-6-[5,7-dihydroxy-2-(4-hydroxyphenyl)-4-oxochromen-3-yl]oxy-3,4-dihydroxy-5-[(E)-3-(4-hydroxyphenyl)prop-2-enoyl]oxyoxan-2-yl]methyl (E)-3-(4-hydroxyphenyl)prop-2-enoate	C39H32O15	YXXQUJGFZPLXJV-AIBWQOBZSA-N	InChI=1S/C39H32O15/c40-23-9-1-20(2-10-23)5-15-30(45)50-19-29-33(47)35(49)38(53-31(46)16-6-21-3-11-24(41)12-4-21)39(52-29)54-37-34(48)32-27(44)17-26(43)18-28(32)51-36(37)22-7-13-25(42)14-8-22/h1-18,29,33,35,38-44,47,49H,19H2/b15-5+,16-6+/t29-,33-,35+,38-,39+/m1/s1	O=C(OC[C@H]1O[C@@H](Oc2c(oc3c(c2=O)c(O)cc(c3)O)c2ccc(cc2)O)[C@@H]([C@H]([C@@H]1O)O)OC(=O)/C=C/c1ccc(cc1)O)/C=C/c1ccc(cc1)O	O43570,P00918,P43166,P22748,P00915	5
Pseudobaptogenin	Isoflavones	3-(1,3-benzodioxol-5-yl)-7-hydroxychromen-4-one	C16H10O5	KNJNBKINYHZUGC-UHFFFAOYSA-N	InChI=1S/C16H10O5/c17-10-2-3-11-14(6-10)19-7-12(16(11)18)9-1-4-13-15(5-9)21-8-20-13/h1-7,17H,8H2	Oc1ccc2c(c1)occ(c2=O)c1ccc2c(c1)OCO2	Q07869,Q03181,P37231	3
(S)-5,7-Dihydroxy-2-(2,2,9,9-Tetramethyl-2,9-Dihydropyrano[3,2-H]Chromen-5-Yl)Chroman-4-One	Flavanones	(2S)-5,7-dihydroxy-2-(2,2,9,9-tetramethylpyrano[3,2-h]chromen-5-yl)-2,3-dihydrochromen-4-one	C25H24O6	BDKFYPKEQKRWHD-IBGZPJMESA-N	InChI=1S/C25H24O6/c1-24(2)7-5-13-9-16(15-6-8-25(3,4)31-23(15)22(13)30-24)19-12-18(28)21-17(27)10-14(26)11-20(21)29-19/h5-11,19,26-27H,12H2,1-4H3/t19-/m0/s1	Oc1cc2O[C@@H](CC(=O)c2c(c1)O)c1cc2C=CC(Oc2c2c1C=CC(O2)(C)C)(C)C	P18031	1
3-O-Methylquercetin	Flavonols	2-(3,4-dihydroxyphenyl)-5,7-dihydroxy-3-methoxychromen-4-one	C16H12O7	WEPBGSIAWZTEJR-UHFFFAOYSA-N	InChI=1S/C16H12O7/c1-22-16-14(21)13-11(20)5-8(17)6-12(13)23-15(16)7-2-3-9(18)10(19)4-7/h2-6,17-20H,1H3	COc1c(oc2c(c1=O)c(O)cc(c2)O)c1ccc(c(c1)O)O	P27695,P15121,P06746,Q8IUX4,O75164,Q9HC16,P07550,P84022,O75496,P42858,P46063,Q9UNA4,Q9H0H5,Q9NR56,Q9Y253,Q96QE3,Q03164,P10636,Q14191,B2RXH2,P10253	21
(+)-Epitaxifolin	Flavanonol	(2S,3R)-2-(3,4-dihydroxyphenyl)-3,5,7-trihydroxy-2,3-dihydrochromen-4-one	C15H12O7	CXQWRCVTCMQVQX-GJZGRUSLSA-N	InChI=1S/C15H12O7/c16-7-4-10(19)12-11(5-7)22-15(14(21)13(12)20)6-1-2-8(17)9(18)3-6/h1-5,14-19,21H/t14-,15-/m0/s1	Oc1cc2O[C@@H](c3ccc(c(c3)O)O)[C@H](C(=O)c2c(c1)O)O	P19838,P08684,P05177,P16050,Q99714,P28482,Q16665	7
b"(2S)-3,5,7-Trihydroxy-8-Methoxy-2,2-Dimethyl-2,6-Bichroman-4-One"	Flavanones	(2S)-5,7-dihydroxy-2-(3-hydroxy-8-methoxy-2,2-dimethyl-3,4-dihydrochromen-6-yl)-2,3-dihydrochromen-4-one	C21H22O7	HTNJCCKJJVLCTO-BUSXIPJBSA-N	InChI=1S/C21H22O7/c1-21(2)18(25)6-11-4-10(5-17(26-3)20(11)28-21)15-9-14(24)19-13(23)7-12(22)8-16(19)27-15/h4-5,7-8,15,18,22-23,25H,6,9H2,1-3H3/t15-,18?/m0/s1	COc1cc(cc2c1OC(C)(C)C(C2)O)[C@@H]1CC(=O)c2c(O1)cc(cc2O)O	P18031	1
Kaempferol 3-O-[Alpha-L-Rhamnopyranosyl(1->2)-Beta-D-Galactopyranosyl]-7-O-Alpha-L-Rhamnopyranoside	Flavonols	3-[(2S,3R,4S,5R,6R)-4,5-dihydroxy-6-(hydroxymethyl)-3-[(2S,3R,4R,5R,6S)-3,4,5-trihydroxy-6-methyloxan-2-yl]oxyoxan-2-yl]oxy-5-hydroxy-2-(4-hydroxyphenyl)-7-[(2S,3R,4R,5R,6S)-3,4,5-trihydroxy-6-methyloxan-2-yl]oxychromen-4-one	C33H40O19	DDELFAUOHDSZJL-KINVIYQBSA-N	InChI=1S/C33H40O19/c1-10-19(37)23(41)26(44)31(46-10)48-14-7-15(36)18-16(8-14)49-28(12-3-5-13(35)6-4-12)29(22(18)40)51-33-30(25(43)21(39)17(9-34)50-33)52-32-27(45)24(42)20(38)11(2)47-32/h3-8,10-11,17,19-21,23-27,30-39,41-45H,9H2,1-2H3/t10-,11-,17+,19-,20-,21-,23+,24+,25-,26+,27+,30+,31-,32-,33-/m0/s1	OC[C@H]1O[C@@H](Oc2c(oc3c(c2=O)c(O)cc(c3)O[C@@H]2O[C@@H](C)[C@@H]([C@H]([C@H]2O)O)O)c2ccc(cc2)O)[C@@H]([C@H]([C@H]1O)O)O[C@@H]1O[C@@H](C)[C@@H]([C@H]([C@H]1O)O)O	P11387	1
Kuwanon C	Flavones	2-(2,4-dihydroxyphenyl)-5,7-dihydroxy-3,8-bis(3-methylbut-2-enyl)chromen-4-one	C25H26O6	UWQYBLOHTQWSQD-UHFFFAOYSA-N	InChI=1S/C25H26O6/c1-13(2)5-8-17-20(28)12-21(29)22-23(30)18(9-6-14(3)4)24(31-25(17)22)16-10-7-15(26)11-19(16)27/h5-7,10-12,26-29H,8-9H2,1-4H3	CC(=CCc1c(oc2c(c1=O)c(O)cc(c2CC=C(C)C)O)c1ccc(cc1O)O)C	P22303,P35354,P23219,P06276,P56817	5
Ohioensin F	Others	</td></tr>\r\n\t\t\t\t<tr><td align=right><b>Synonyms: &nbsp</b>	C23H16O6	CJDAIJHZTKDLTJ-VABKMULXSA-N	InChI=1S/C23H16O6/c24-10-5-6-11-12(7-10)22-21-20-18(11)14(25)8-15(26)19(20)16(27)9-23(21,28)13-3-1-2-4-17(13)29-22/h1-8,21-22,24-26,28H,9H2/t21-,22-,23-/m0/s1	Oc1ccc2c(c1)[C@@H]1Oc3ccccc3[C@@]3([C@H]1c1c2c(O)cc(c1C(=O)C3)O)O	P18031	1
8-Prenylapigenin	Flavones	5,7-dihydroxy-2-(4-hydroxyphenyl)-8-(3-methylbut-2-enyl)chromen-4-one	C20H18O5	MEHHCBRCXIDGKZ-UHFFFAOYSA-N	InChI=1S/C20H18O5/c1-11(2)3-8-14-15(22)9-16(23)19-17(24)10-18(25-20(14)19)12-4-6-13(21)7-5-12/h3-7,9-10,21-23H,8H2,1-2H3	CC(=CCc1c(O)cc(c2c1oc(cc2=O)c1ccc(cc1)O)O)C	O76074	1
Mulberrofuran D	Others	5-[7-[(2E)-3,7-dimethylocta-2,6-dienyl]-6-hydroxy-1-benzofuran-2-yl]-4-(3-methylbut-2-enyl)benzene-1,3-diol	C29H34O4	WCJPAQJEARHLGS-KEBDBYFISA-N	InChI=1S/C29H34O4/c1-18(2)7-6-8-20(5)10-13-24-26(31)14-11-21-15-28(33-29(21)24)25-16-22(30)17-27(32)23(25)12-9-19(3)4/h7,9-11,14-17,30-32H,6,8,12-13H2,1-5H3/b20-10+	C/C(=CCc1c(O)ccc2c1oc(c2)c1cc(O)cc(c1CC=C(C)C)O)/CCC=C(C)C	P18031	1
Tectorigenin	Isoflavones	5,7-dihydroxy-3-(4-hydroxyphenyl)-6-methoxychromen-4-one	C16H12O6	OBBCRPUNCUPUOS-UHFFFAOYSA-N	InChI=1S/C16H12O6/c1-21-16-11(18)6-12-13(15(16)20)14(19)10(7-22-12)8-2-4-9(17)5-3-8/h2-7,17-18,20H,1H3	COc1c(O)cc2c(c1O)c(=O)c(co2)c1ccc(cc1)O	P00533	1
2-(3,4-Dihydroxyphenyl)-8-[2-(3,4-Dihydroxyphenyl)-3,5,7-Trihydroxy-3,4-Dihydro-2H-Chromen-4-Yl]-3,4-Dihydro-2H-Chromene-3,5,7-Triol	Flavan-3-ols	2-(3,4-dihydroxyphenyl)-8-[2-(3,4-dihydroxyphenyl)-3,5,7-trihydroxy-3,4-dihydro-2H-chromen-4-yl]-3,4-dihydro-2H-chromene-3,5,7-triol	C30H26O12	XFZJEEAOWLFHDH-UHFFFAOYSA-N	InChI=1S/C30H26O12/c31-13-7-20(37)24-23(8-13)41-29(12-2-4-16(33)19(36)6-12)27(40)26(24)25-21(38)10-17(34)14-9-22(39)28(42-30(14)25)11-1-3-15(32)18(35)5-11/h1-8,10,22,26-29,31-40H,9H2	Oc1cc(O)c2c(c1)OC(C(C2c1c(O)cc(c2c1OC(C(C2)O)c1ccc(c(c1)O)O)O)O)c1ccc(c(c1)O)O	P18433,P23467	2
7-Hydroxyflavone	Flavones	7-hydroxy-2-phenylchromen-4-one	C15H10O3	MQGPSCMMNJKMHQ-UHFFFAOYSA-N	InChI=1S/C15H10O3/c16-11-6-7-12-13(17)9-14(18-15(12)8-11)10-4-2-1-3-5-10/h1-9,16H	Oc1ccc2c(c1)oc(cc2=O)c1ccccc1	P15121,P18054,P37058,P47989,Q16790,P00915,P14061,P11511,P05067,P37059,P08183,O60218,P27338,O43570,P00918,P05177,P09917,P62158	18
(2R,3S,3As)-2-(1,3-Benzodioxol-5-Yl)-5,7-Dimethoxy-3-Methyl-3A-Prop-2-Enyl-2,3-Dihydro-1-Benzofuran-6-One	Others	(2R,3S,3aS)-2-(1,3-benzodioxol-5-yl)-5,7-dimethoxy-3-methyl-3a-prop-2-enyl-2,3-dihydro-1-benzofuran-6-one	C21H22O6	GAIYJSQKRRARSH-HXGDPMPDSA-N	InChI=1S/C21H22O6/c1-5-8-21-10-16(23-3)17(22)19(24-4)20(21)27-18(12(21)2)13-6-7-14-15(9-13)26-11-25-14/h5-7,9-10,12,18H,1,8,11H2,2-4H3/t12-,18-,21-/m1/s1	C=CC[C@]12C=C(OC)C(=O)C(=C1O[C@H]([C@H]2C)c1ccc2c(c1)OCO2)OC	Q9UNA4	1
Afzelechin-3-O-Alpha-Lrhamnopyranoside	Flavan-3-ols	(2S,3R,4R,5R,6S)-2-[[(2R,3S)-5,7-dihydroxy-2-(4-hydroxyphenyl)-3,4-dihydro-2H-chromen-3-yl]oxy]-6-methyloxane-3,4,5-triol	C21H24O9	SQJLTDFIOMWZDE-QUYVSAIISA-N	InChI=1S/C21H24O9/c1-9-17(25)18(26)19(27)21(28-9)30-16-8-13-14(24)6-12(23)7-15(13)29-20(16)10-2-4-11(22)5-3-10/h2-7,9,16-27H,8H2,1H3/t9-,16-,17-,18+,19+,20+,21-/m0/s1	Oc1ccc(cc1)[C@H]1Oc2cc(O)cc(c2C[C@@H]1O[C@@H]1O[C@@H](C)[C@@H]([C@H]([C@H]1O)O)O)O	P35354,P23219	2
5,7-Dihydroxy-2-(4-Hydroxyphenyl)-3-[(2R,3S,4R,5R,6S)-3,4,5-Trihydroxy-6-(Hydroxymethyl)Oxan-2-Yl]Oxychromen-4-One	Flavonols	5,7-dihydroxy-2-(4-hydroxyphenyl)-3-[(2R,3S,4R,5R,6S)-3,4,5-trihydroxy-6-(hydroxymethyl)oxan-2-yl]oxychromen-4-one	C21H20O11	JPUKWEQWGBDDQB-LQSBFMDOSA-N	InChI=1S/C21H20O11/c22-7-13-15(26)17(28)18(29)21(31-13)32-20-16(27)14-11(25)5-10(24)6-12(14)30-19(20)8-1-3-9(23)4-2-8/h1-6,13,15,17-18,21-26,28-29H,7H2/t13-,15-,17+,18-,21+/m0/s1	OC[C@@H]1O[C@H](Oc2c(oc3c(c2=O)c(O)cc(c3)O)c2ccc(cc2)O)[C@H]([C@@H]([C@H]1O)O)O	P27695,Q9Y253,Q13526,P07237,Q99700	5
6,7-Dihydroxy-2-(4-Hydroxyphenyl)Chromen-4-One	Flavones	6,7-dihydroxy-2-(4-hydroxyphenyl)chromen-4-one	C15H10O5	XADJWCRESPGUTB-UHFFFAOYSA-N	InChI=1S/C15H10O5/c16-9-3-1-8(2-4-9)14-6-11(17)10-5-12(18)13(19)7-15(10)20-14/h1-7,16,18-19H	Oc1ccc(cc1)c1cc(=O)c2c(o1)cc(c(c2)O)O	P24666	1
5,7-Dihydroxy-3-(8-Hydroxy-2,2-Dimethylchromen-6-Yl)Chromen-4-One	Isoflavones	5,7-dihydroxy-3-(8-hydroxy-2,2-dimethylchromen-6-yl)chromen-4-one	C20H16O6	LWZACZCRAUQSLH-UHFFFAOYSA-N	InChI=1S/C20H16O6/c1-20(2)4-3-10-5-11(6-15(23)19(10)26-20)13-9-25-16-8-12(21)7-14(22)17(16)18(13)24/h3-9,21-23H,1-2H3	Oc1cc(O)c2c(c1)occ(c2=O)c1cc(O)c2c(c1)C=CC(O2)(C)C	O75496,Q8WZA2	2
Puerarin	Isoflavones	7-hydroxy-3-(4-hydroxyphenyl)-8-[(2S,3R,4R,5S,6R)-3,4,5-trihydroxy-6-(hydroxymethyl)oxan-2-yl]chromen-4-one	C21H20O9	HKEAFJYKMMKDOR-VPRICQMDSA-N	InChI=1S/C21H20O9/c22-7-14-17(26)18(27)19(28)21(30-14)15-13(24)6-5-11-16(25)12(8-29-20(11)15)9-1-3-10(23)4-2-9/h1-6,8,14,17-19,21-24,26-28H,7H2/t14-,17-,18+,19-,21+/m1/s1	OC[C@H]1O[C@H]([C@@H]([C@H]([C@@H]1O)O)O)c1c(O)ccc2c1occ(c2=O)c1ccc(cc1)O	O43570,P43166,Q99685,P00915	4
(2S,3S)-2-(3,4-Dihydroxyphenyl)-5,7-Dihydroxy-3-[(2S,3R,4R,5R,6S)-3,4,5-Trihydroxy-6-Methyloxan-2-Yl]Oxy-2,3-Dihydrochromen-4-One	Flavanonol	(2S,3S)-2-(3,4-dihydroxyphenyl)-5,7-dihydroxy-3-[(2S,3R,4R,5R,6S)-3,4,5-trihydroxy-6-methyloxan-2-yl]oxy-2,3-dihydrochromen-4-one	C21H22O11	ZROGCCBNZBKLEL-MFSALPCASA-N	InChI=1S/C21H22O11/c1-7-15(26)17(28)18(29)21(30-7)32-20-16(27)14-12(25)5-9(22)6-13(14)31-19(20)8-2-3-10(23)11(24)4-8/h2-7,15,17-26,28-29H,1H3/t7-,15-,17+,18+,19-,20+,21-/m0/s1	Oc1cc(O)c2c(c1)O[C@H]([C@@H](C2=O)O[C@@H]1O[C@@H](C)[C@@H]([C@H]([C@H]1O)O)O)c1ccc(c(c1)O)O	O94925,P11308,Q13526,Q9HC16,P07237	5
Koparin	Isoflavones	3-(2,3-dihydroxy-4-methoxyphenyl)-7-hydroxychromen-4-one	C16H12O6	SMOFGXHPWCTYQD-UHFFFAOYSA-N	InChI=1S/C16H12O6/c1-21-12-5-4-9(15(19)16(12)20)11-7-22-13-6-8(17)2-3-10(13)14(11)18/h2-7,17,19-20H,1H3	COc1ccc(c(c1O)O)c1coc2c(c1=O)ccc(c2)O	P27695,P00352,O94782,Q9UBT6,P10636,Q92830,P15428,Q9NPD5,Q9Y6L6,Q9NUW8,Q99714,P11473,P46063,B2RXH2	14
Prunetrin	Isoflavones	5-hydroxy-7-methoxy-3-[4-[(2S,3R,4S,5S,6R)-3,4,5-trihydroxy-6-(hydroxymethyl)oxan-2-yl]oxyphenyl]chromen-4-one	C22H22O10	OFUWGCQDMVDLIR-RECXWPGBSA-N	InChI=1S/C22H22O10/c1-29-12-6-14(24)17-15(7-12)30-9-13(18(17)25)10-2-4-11(5-3-10)31-22-21(28)20(27)19(26)16(8-23)32-22/h2-7,9,16,19-24,26-28H,8H2,1H3/t16-,19-,20+,21-,22-/m1/s1	OC[C@H]1O[C@@H](Oc2ccc(cc2)c2coc3c(c2=O)c(O)cc(c3)OC)[C@@H]([C@H]([C@@H]1O)O)O	O15118,Q16236,P51151,Q9UNA4,Q96QE3,P38398	6
Trimethylapigenin	Flavones	5,7-dimethoxy-2-(4-methoxyphenyl)chromen-4-one	C18H16O5	ZXJJBDHPUHUUHD-UHFFFAOYSA-N	InChI=1S/C18H16O5/c1-20-12-6-4-11(5-7-12)15-10-14(19)18-16(22-3)8-13(21-2)9-17(18)23-15/h4-10H,1-3H3	COc1ccc(cc1)c1cc(=O)c2c(o1)cc(cc2OC)OC	P08183	1
Castanin	Isoflavones	7-hydroxy-6-methoxy-3-(4-methoxyphenyl)chromen-4-one	C17H14O5	KJGPBYUQZLUKLL-UHFFFAOYSA-N	InChI=1S/C17H14O5/c1-20-11-5-3-10(4-6-11)13-9-22-15-8-14(18)16(21-2)7-12(15)17(13)19/h3-9,18H,1-2H3	COc1ccc(cc1)c1coc2c(c1=O)cc(c(c2)O)OC	P18031,P04637,O75496,P49862,P17405,P38398,P51151,Q96QE3,O75874	9
Silychristin	Flavanonol	(2R,3R)-3,5,7-trihydroxy-2-[(2R,3S)-7-hydroxy-2-(4-hydroxy-3-methoxyphenyl)-3-(hydroxymethyl)-2,3-dihydro-1-benzofuran-5-yl]-2,3-dihydrochromen-4-one	C25H22O10	BMLIIPOXVWESJG-LMBCONBSSA-N	InChI=1S/C25H22O10/c1-33-18-6-10(2-3-15(18)28)23-14(9-26)13-4-11(5-17(30)25(13)35-23)24-22(32)21(31)20-16(29)7-12(27)8-19(20)34-24/h2-8,14,22-24,26-30,32H,9H2,1H3/t14-,22+,23+,24-/m1/s1	OC[C@@H]1c2cc(cc(c2O[C@H]1c1ccc(c(c1)OC)O)O)[C@H]1Oc2cc(O)cc(c2C(=O)[C@@H]1O)O	O94956,Q9NPD5,Q9Y6L6	3
Gneyulin	Others	4-[(2R,3R)-3-(3,5-dihydroxyphenyl)-5-[(2R,3R)-3-(3,5-dihydroxyphenyl)-4-hydroxy-6-(6-hydroxy-1-benzofuran-2-yl)-2,3-dihydro-1-benzofuran-2-yl]-6-hydroxy-2,3-dihydro-1-benzofuran-2-yl]benzene-1,3-diol	C42H30O12	HGGUGLARKRGHTC-IASBXJNJSA-N	InChI=1S/C42H30O12/c43-22-3-4-28(31(49)14-22)41-38(20-5-24(45)12-25(46)6-20)30-16-29(32(50)17-36(30)53-41)42-39(21-7-26(47)13-27(48)8-21)40-33(51)9-19(11-37(40)54-42)34-10-18-1-2-23(44)15-35(18)52-34/h1-17,38-39,41-51H/t38-,39-,41+,42+/m1/s1	Oc1cc(O)cc(c1)[C@H]1[C@@H](Oc2c1c(O)cc(c2)c1oc2c(c1)ccc(c2)O)c1cc2c(cc1O)O[C@H]([C@@H]2c1cc(O)cc(c1)O)c1ccc(cc1O)O	P31639,P13866	2
Sericetin	Flavonols	5,7-dihydroxy-2,2-dimethyl-10-(3-methylbut-2-enyl)-8-phenylpyrano[3,2-g]chromen-6-one	C25H24O5	BPGVKIFGOXGHPB-UHFFFAOYSA-N	InChI=1S/C25H24O5/c1-14(2)10-11-17-23-16(12-13-25(3,4)30-23)19(26)18-20(27)21(28)22(29-24(17)18)15-8-6-5-7-9-15/h5-10,12-13,26,28H,11H2,1-4H3	CC(=CCc1c2OC(C)(C)C=Cc2c(c2c1oc(c1ccccc1)c(c2=O)O)O)C	O94782,P08684,Q9NPD5,Q9Y6L6	4
Sappanone	Others	(3R)-3-[(3,4-dihydroxyphenyl)methyl]-3,7-dihydroxy-2H-chromen-4-one	C16H14O6	BTLMXNHNFFXBHW-MRXNPFEDSA-N	InChI=1S/C16H14O6/c17-10-2-3-11-14(6-10)22-8-16(21,15(11)20)7-9-1-4-12(18)13(19)5-9/h1-6,17-19,21H,7-8H2/t16-/m1/s1	Oc1ccc2c(c1)OC[C@](C2=O)(O)Cc1ccc(c(c1)O)O	P12931,P35968	2
b"5,7,3,4-Tetrahydroxy-6-Geranylflavono"	Flavonols	2-(3,4-dihydroxyphenyl)-6-[(2E)-3,7-dimethylocta-2,6-dienyl]-3,5,7-trihydroxychromen-4-one	C25H26O7	DMSHSZYADCTYHE-VGOFMYFVSA-N	InChI=1S/C25H26O7/c1-13(2)5-4-6-14(3)7-9-16-18(27)12-20-21(22(16)29)23(30)24(31)25(32-20)15-8-10-17(26)19(28)11-15/h5,7-8,10-12,26-29,31H,4,6,9H2,1-3H3/b14-7+	C/C(=CCc1c(O)cc2c(c1O)c(=O)c(c(o2)c1ccc(c(c1)O)O)O)/CCC=C(C)C	P11511	1
Sulfuretin	Others	(2Z)-2-[(3,4-dihydroxyphenyl)methylidene]-6-hydroxy-1-benzofuran-3-one	C15H10O5	RGNXWPVNPFAADO-NSIKDUERSA-N	InChI=1S/C15H10O5/c16-9-2-3-10-13(7-9)20-14(15(10)19)6-8-1-4-11(17)12(18)5-8/h1-7,16-18H/b14-6-	Oc1ccc2c(c1)O/C(=Cc1ccc(c(c1)O)O)/C2=O	O00487,P09923,P43220,Q15078,O15118,Q03431,Q9HBX9,P84022,P11511,B2RXH2,Q07820,P10696,Q8WXD0,O95398,Q9H0H5,Q9Y253,Q96QE3,Q03164,Q9UBT6,P10636,P05186,P08253,Q03164,Q96KQ7,Q9UNA4,P10253	26
Odoratin	Isoflavones	7-hydroxy-3-(3-hydroxy-4-methoxyphenyl)-6-methoxychromen-4-one	C17H14O6	BYNYZQQDQIQLSO-UHFFFAOYSA-N	InChI=1S/C17H14O6/c1-21-14-4-3-9(5-12(14)18)11-8-23-15-7-13(19)16(22-2)6-10(15)17(11)20/h3-8,18-19H,1-2H3	COc1ccc(cc1O)c1coc2c(c1=O)cc(c(c2)O)OC	P18031,P37231	2
Moracin I	Others	2-[5-hydroxy-3-methoxy-2-(3-methylbut-2-enyl)phenyl]-1-benzofuran-6-ol	C20H20O4	MRJQFSZVXAESPR-UHFFFAOYSA-N	InChI=1S/C20H20O4/c1-12(2)4-7-16-17(9-15(22)11-19(16)23-3)20-8-13-5-6-14(21)10-18(13)24-20/h4-6,8-11,21-22H,7H2,1-3H3	COc1cc(O)cc(c1CC=C(C)C)c1cc2c(o1)cc(cc2)O	P11511	1
b"(2S)-5,7,2,4-Tetrahydroxyflavanone"	Flavanones	(2S)-2-(2,4-dihydroxyphenyl)-5,7-dihydroxy-2,3-dihydrochromen-4-one	C15H12O6	QBLQLKNOKUHRCH-ZDUSSCGKSA-N	InChI=1S/C15H12O6/c16-7-1-2-9(10(18)3-7)13-6-12(20)15-11(19)4-8(17)5-14(15)21-13/h1-5,13,16-19H,6H2/t13-/m0/s1	Oc1ccc(c(c1)O)[C@@H]1CC(=O)c2c(O1)cc(cc2O)O	P11511	1
Centaureidin	Flavonols	5,7-dihydroxy-2-(3-hydroxy-4-methoxyphenyl)-3,6-dimethoxychromen-4-one	C18H16O8	BZXULYMZYPRZOG-UHFFFAOYSA-N	InChI=1S/C18H16O8/c1-23-11-5-4-8(6-9(11)19)16-18(25-3)15(22)13-12(26-16)7-10(20)17(24-2)14(13)21/h4-7,19-21H,1-3H3	COc1ccc(cc1O)c1oc2cc(O)c(c(c2c(=O)c1OC)O)OC	P43220,O75874,O94925,Q9Y253,P51843,P39748,Q9BUF5,O75496,P84022,Q99700	10
8-Prenylquercetin	Flavonols	2-(3,4-dihydroxyphenyl)-3,5,7-trihydroxy-8-(3-methylbut-2-enyl)chromen-4-one	C20H18O7	ZHTTWVRMGWQEOH-UHFFFAOYSA-N	InChI=1S/C20H18O7/c1-9(2)3-5-11-13(22)8-15(24)16-17(25)18(26)19(27-20(11)16)10-4-6-12(21)14(23)7-10/h3-4,6-8,21-24,26H,5H2,1-2H3	CC(=CCc1c(O)cc(c2c1oc(c1ccc(c(c1)O)O)c(c2=O)O)O)C	O76074	1
Folitenol	Others	</td></tr>\r\n\t\t\t\t<tr><td align=right><b>Synonyms: &nbsp</b>	C25H26O4	XERSCIKBWOLVNC-CYFREDJKSA-N	InChI=1S/C25H26O4/c1-14(2)5-6-15-11-18-22(12-20(15)26)27-13-19-16-7-8-21-17(23(16)28-24(18)19)9-10-25(3,4)29-21/h5,7-12,19,24,26H,6,13H2,1-4H3/t19-,24-/m0/s1	CC(=CCc1cc2c(cc1O)OC[C@@H]1[C@H]2Oc2c1ccc1c2C=CC(O1)(C)C)C	P18031	1
Naringenin	Flavanones	(2S)-5,7-dihydroxy-2-(4-hydroxyphenyl)-2,3-dihydrochromen-4-one	C15H12O5	FTVWIRXFELQLPI-ZDUSSCGKSA-N	InChI=1S/C15H12O5/c16-9-3-1-8(2-4-9)13-7-12(19)15-11(18)5-10(17)6-14(15)20-13/h1-6,13,16-18H,7H2/t13-/m0/s1	Oc1ccc(cc1)[C@@H]1CC(=O)c2c(O1)cc(cc2O)O	P49841,P43166,P47989,P16152,P22309,Q99714,P35503,Q9HAW9,Q9NPD5,Q9Y6L6,P33261,P04278,P11511,O75496,P04745,P22748,O75874,P37231,P03372,P05177,O76074,P33527,P15121,Q03181,P35354,Q9NUW8,P22303,P04798,P14061,P37059,Q9HAW8,P08183,Q04760,Q16678,P62158,O94782,P54855,Q92887,P03372,O94956,Q92731,O43570,P08684	43
b"7,4-Dihydroxyflavan"	Others	2-(4-hydroxyphenyl)-3,4-dihydro-2H-chromen-7-ol	C15H14O3	YXMLGIGHGPSEKA-UHFFFAOYSA-N	InChI=1S/C15H14O3/c16-12-5-1-10(2-6-12)14-8-4-11-3-7-13(17)9-15(11)18-14/h1-3,5-7,9,14,16-17H,4,8H2	Oc1ccc(cc1)C1CCc2c(O1)cc(cc2)O	P14555	1
3-Hydroxy-2-(3-Hydroxy-4-Methoxyphenyl)-5,6,7-Trimethoxychromen-4-One	Flavonols	3-hydroxy-2-(3-hydroxy-4-methoxyphenyl)-5,6,7-trimethoxychromen-4-one	C19H18O8	UEPKLBOJSLVOIP-UHFFFAOYSA-N	InChI=1S/C19H18O8/c1-23-11-6-5-9(7-10(11)20)17-16(22)15(21)14-12(27-17)8-13(24-2)18(25-3)19(14)26-4/h5-8,20,22H,1-4H3	COc1cc2oc(c3ccc(c(c3)O)OC)c(c(=O)c2c(c1OC)OC)O	Q9BUF5	1
Penduletin	Flavonols	5-hydroxy-2-(4-hydroxyphenyl)-3,6,7-trimethoxychromen-4-one	C18H16O7	YSXFFLGRZJWNFM-UHFFFAOYSA-N	InChI=1S/C18H16O7/c1-22-12-8-11-13(14(20)17(12)23-2)15(21)18(24-3)16(25-11)9-4-6-10(19)7-5-9/h4-8,19-20H,1-3H3	COc1c(oc2c(c1=O)c(O)c(c(c2)OC)OC)c1ccc(cc1)O	P15121,Q9UNQ0,P08183	3
b"3,4,7-Trihydroxyflavon"	Flavones	2-(3,4-dihydroxyphenyl)-7-hydroxychromen-4-one	C15H10O5	PVFGJHYLIHMCQD-UHFFFAOYSA-N	InChI=1S/C15H10O5/c16-9-2-3-10-12(18)7-14(20-15(10)6-9)8-1-4-11(17)13(19)5-8/h1-7,16-17,19H	Oc1ccc2c(c1)oc(cc2=O)c1ccc(c(c1)O)O	Q9H2K2,O14746,P09874,P09917,O95271	5
Chrysoeriol	Flavones	5,7-dihydroxy-2-(4-hydroxy-3-methoxyphenyl)chromen-4-one	C16H12O6	SCZVLDHREVKTSH-UHFFFAOYSA-N	InChI=1S/C16H12O6/c1-21-14-4-8(2-3-10(14)18)13-7-12(20)16-11(19)5-9(17)6-15(16)22-13/h2-7,17-19H,1H3	COc1cc(ccc1O)c1cc(=O)c2c(o1)cc(cc2O)O	O94782,Q03181,P39748,P04798,Q92887,Q04206,P00352,O75496,Q13526,Q96QE3,P37231,Q03164,P05177,P09917,Q03164,Q16678,P33527	17
Glycyrrhisoflavone	Isoflavones	3-[3,4-dihydroxy-5-(3-methylbut-2-enyl)phenyl]-5,7-dihydroxychromen-4-one	C20H18O6	JOQWUUJQWPZLAT-UHFFFAOYSA-N	InChI=1S/C20H18O6/c1-10(2)3-4-11-5-12(6-16(23)19(11)24)14-9-26-17-8-13(21)7-15(22)18(17)20(14)25/h3,5-9,21-24H,4H2,1-2H3	CC(=CCc1cc(cc(c1O)O)c1coc2c(c1=O)c(O)cc(c2)O)C	P18031	1
3,5,7-Trimethoxyflavone	Flavonols	3,5,7-trimethoxy-2-phenylchromen-4-one	C18H16O5	CBTHKWVPSIGKMI-UHFFFAOYSA-N	InChI=1S/C18H16O5/c1-20-12-9-13(21-2)15-14(10-12)23-17(18(22-3)16(15)19)11-7-5-4-6-8-11/h4-10H,1-3H3	COc1cc(OC)c2c(c1)oc(c(c2=O)OC)c1ccccc1	P0DMS8	1
Robinetin	Flavonols	3,7-dihydroxy-2-(3,4,5-trihydroxyphenyl)chromen-4-one	C15H10O7	SOEDEYVDCDYMMH-UHFFFAOYSA-N	InChI=1S/C15H10O7/c16-7-1-2-8-11(5-7)22-15(14(21)12(8)19)6-3-9(17)13(20)10(18)4-6/h1-5,16-18,20-21H	Oc1ccc2c(c1)oc(c(c2=O)O)c1cc(O)c(c(c1)O)O	P33527,Q03164,Q9UBT6,P28907,Q9NUW8,P11473,P46063	7
5,7-Dihydroxy-2-(4-Hydroxyphenyl)-3-[3,4,5-Trihydroxy-6-[(3,4,5-Trihydroxy-6-Methyloxan-2-Yl)Oxymethyl]Oxan-2-Yl]Oxychromen-4-One	Flavonols	5,7-dihydroxy-2-(4-hydroxyphenyl)-3-[3,4,5-trihydroxy-6-[(3,4,5-trihydroxy-6-methyloxan-2-yl)oxymethyl]oxan-2-yl]oxychromen-4-one	C27H30O15	RTATXGUCZHCSNG-UHFFFAOYSA-N	InChI=1S/C27H30O15/c1-9-17(31)20(34)22(36)26(39-9)38-8-15-18(32)21(35)23(37)27(41-15)42-25-19(33)16-13(30)6-12(29)7-14(16)40-24(25)10-2-4-11(28)5-3-10/h2-7,9,15,17-18,20-23,26-32,34-37H,8H2,1H3	Oc1ccc(cc1)c1oc2cc(O)cc(c2c(=O)c1OC1OC(COC2OC(C)C(C(C2O)O)O)C(C(C1O)O)O)O	P27695,O94925,Q13951,Q9Y468,Q9UBT6,O75164,Q14191,P06746,O75496,Q9UIF8,P46063,Q9UNA4,P10253,Q9Y253	14
Aureusidin	Others	(2Z)-2-[(3,4-dihydroxyphenyl)methylidene]-4,6-dihydroxy-1-benzofuran-3-one	C15H10O6	WBEFUVAYFSOUEA-PQMHYQBVSA-N	InChI=1S/C15H10O6/c16-8-5-11(19)14-12(6-8)21-13(15(14)20)4-7-1-2-9(17)10(18)3-7/h1-6,16-19H/b13-4-	Oc1cc2O/C(=Cc3ccc(c(c3)O)O)/C(=O)c2c(c1)O	Q13547,Q92769,Q9UBN7,Q15078,Q969S8	5
8-(6-Hydroxy-1-Benzofuran-2-Yl)-2,2-Dimethylchromen-5-Ol	Others	8-(6-hydroxy-1-benzofuran-2-yl)-2,2-dimethylchromen-5-ol	C19H16O4	SJIZTMNAKZAOTA-UHFFFAOYSA-N	InChI=1S/C19H16O4/c1-19(2)8-7-13-15(21)6-5-14(18(13)23-19)17-9-11-3-4-12(20)10-16(11)22-17/h3-10,20-21H,1-2H3	Oc1ccc2c(c1)oc(c2)c1ccc(c2c1OC(C)(C)C=C2)O	P18031	1
b"7,4,7,4-O-Methyl-Amentoflavone"	Flavones	5-hydroxy-8-[5-(5-hydroxy-7-methoxy-4-oxochromen-2-yl)-2-methoxyphenyl]-7-methoxy-2-(4-methoxyphenyl)chromen-4-one	C34H26O10	VXQYICLHHMETFH-UHFFFAOYSA-N	InChI=1S/C34H26O10/c1-39-19-8-5-17(6-9-19)27-15-24(37)33-25(38)16-29(42-4)31(34(33)44-27)21-11-18(7-10-26(21)41-3)28-14-23(36)32-22(35)12-20(40-2)13-30(32)43-28/h5-16,35,38H,1-4H3	COc1ccc(cc1)c1cc(=O)c2c(o1)c(c(cc2O)OC)c1cc(ccc1OC)c1cc(=O)c2c(o1)cc(cc2O)OC	P56817	1
b"Apigenin-4-O-(2,6-Di-O-P-Coumaroyl)-Beta-D-Glucopyranoside"	Flavones	[(2S,3R,4R,5S,6R)-6-[4-(5,7-dihydroxy-4-oxochromen-2-yl)phenoxy]-3,4-dihydroxy-5-[(E)-3-(4-hydroxyphenyl)prop-2-enoyl]oxyoxan-2-yl]methyl (E)-3-(4-hydroxyphenyl)prop-2-enoate	C39H32O14	CGRSWPSYXURRMV-LJFOHRRRSA-N	InChI=1S/C39H32O14/c40-24-9-1-21(2-10-24)5-15-33(45)49-20-32-36(47)37(48)38(53-34(46)16-6-22-3-11-25(41)12-4-22)39(52-32)50-27-13-7-23(8-14-27)30-19-29(44)35-28(43)17-26(42)18-31(35)51-30/h1-19,32,36-43,47-48H,20H2/b15-5+,16-6+/t32-,36-,37+,38-,39-/m0/s1	O=C(O[C@@H]1[C@@H](Oc2ccc(cc2)c2cc(=O)c3c(o2)cc(cc3O)O)O[C@H]([C@@H]([C@H]1O)O)COC(=O)/C=C/c1ccc(cc1)O)/C=C/c1ccc(cc1)O	P47989	1
Kaempferol-3-O-(2,3,4-Tri-O-Acetyl-Alpha-L-Rhamnopyranoside)	Flavonols	[(2S,3S,4R,5R,6S)-4,5-diacetyloxy-6-[5,7-dihydroxy-2-(4-hydroxyphenyl)-4-oxochromen-3-yl]oxy-2-methyloxan-3-yl] acetate	C27H26O13	OFWDHNGVKNRLFY-LHZKXVGGSA-N	InChI=1S/C27H26O13/c1-11-22(36-12(2)28)25(37-13(3)29)26(38-14(4)30)27(35-11)40-24-21(34)20-18(33)9-17(32)10-19(20)39-23(24)15-5-7-16(31)8-6-15/h5-11,22,25-27,31-33H,1-4H3/t11-,22-,25+,26+,27-/m0/s1	CC(=O)O[C@H]1[C@@H](O[C@H]([C@@H]([C@H]1OC(=O)C)OC(=O)C)C)Oc1c(oc2c(c1=O)c(O)cc(c2)O)c1ccc(cc1)O	P08684,P10635	2
Artocarpin	Flavones	2-(2,4-dihydroxyphenyl)-5-hydroxy-7-methoxy-6-[(E)-3-methylbut-1-enyl]-3-(3-methylbut-2-enyl)chromen-4-one	C26H28O6	KRGDFVQWQJIMEK-RMKNXTFCSA-N	InChI=1S/C26H28O6/c1-14(2)6-9-18-21(31-5)13-22-23(24(18)29)25(30)19(10-7-15(3)4)26(32-22)17-11-8-16(27)12-20(17)28/h6-9,11-14,27-29H,10H2,1-5H3/b9-6+	COc1cc2oc(c3ccc(cc3O)O)c(c(=O)c2c(c1/C=C/C(C)C)O)CC=C(C)C	P0DMS8	1
b"5,7,3,5-Tetrahydroxy-3,4-Dimethyoxyflavone"	Flavonols	2-(3,5-dihydroxy-4-methoxyphenyl)-5,7-dihydroxy-3-methoxychromen-4-one	C17H14O8	MVJHAGLBHWPKLS-UHFFFAOYSA-N	InChI=1S/C17H14O8/c1-23-16-10(20)3-7(4-11(16)21)15-17(24-2)14(22)13-9(19)5-8(18)6-12(13)25-15/h3-6,18-21H,1-2H3	COc1c(O)cc(cc1O)c1oc2cc(O)cc(c2c(=O)c1OC)O	O14763	1
Bilobetin	Flavones	8-[5-(5,7-dihydroxy-4-oxochromen-2-yl)-2-methoxyphenyl]-5,7-dihydroxy-2-(4-hydroxyphenyl)chromen-4-one	C31H20O10	IWEIJEPIYMAGTH-UHFFFAOYSA-N	InChI=1S/C31H20O10/c1-39-24-7-4-15(26-12-22(37)29-19(34)9-17(33)10-27(29)40-26)8-18(24)28-20(35)11-21(36)30-23(38)13-25(41-31(28)30)14-2-5-16(32)6-3-14/h2-13,32-36H,1H3	COc1ccc(cc1c1c(O)cc(c2c1oc(cc2=O)c1ccc(cc1)O)O)c1cc(=O)c2c(o1)cc(cc2O)O	P43235,P56817	2
7-O-Methyl-Isoginkgetin	Flavones	5-hydroxy-8-[5-(5-hydroxy-7-methoxy-4-oxochromen-2-yl)-2-methoxyphenyl]-2-(4-hydroxyphenyl)-7-methoxychromen-4-one	C33H24O10	UXZIDQIKMJUHLZ-UHFFFAOYSA-N	InChI=1S/C33H24O10/c1-39-19-11-21(35)31-22(36)13-27(42-29(31)12-19)17-6-9-25(40-2)20(10-17)30-28(41-3)15-24(38)32-23(37)14-26(43-33(30)32)16-4-7-18(34)8-5-16/h4-15,34-35,38H,1-3H3	COc1ccc(cc1c1c(OC)cc(c2c1oc(cc2=O)c1ccc(cc1)O)O)c1cc(=O)c2c(o1)cc(cc2O)OC	P56817	1
Sigmoidin	Flavanones	(2S)-2-[3,4-dihydroxy-5-(3-methylbut-2-enyl)phenyl]-5,7-dihydroxy-2,3-dihydrochromen-4-one	C20H20O6	SFQIGPZCFNTPOD-KRWDZBQOSA-N	InChI=1S/C20H20O6/c1-10(2)3-4-11-5-12(6-16(24)20(11)25)17-9-15(23)19-14(22)7-13(21)8-18(19)26-17/h3,5-8,17,21-22,24-25H,4,9H2,1-2H3/t17-/m0/s1	CC(=CCc1cc(cc(c1O)O)[C@@H]1CC(=O)c2c(O1)cc(cc2O)O)C	P18031	1
Kaempferol-3-O-(2,3-Di-O-Acetyl-Alpha-L-Rhamnopyranoside)	Flavonols	[(2S,3R,4R,5S,6S)-3-acetyloxy-2-[5,7-dihydroxy-2-(4-hydroxyphenyl)-4-oxochromen-3-yl]oxy-5-hydroxy-6-methyloxan-4-yl] acetate	C25H24O12	BHCRVKVXJRBQJR-YPDHAKIYSA-N	InChI=1S/C25H24O12/c1-10-19(31)22(34-11(2)26)24(35-12(3)27)25(33-10)37-23-20(32)18-16(30)8-15(29)9-17(18)36-21(23)13-4-6-14(28)7-5-13/h4-10,19,22,24-25,28-31H,1-3H3/t10-,19-,22+,24+,25-/m0/s1	CC(=O)O[C@H]1[C@@H](O[C@H]([C@@H]([C@H]1OC(=O)C)O)C)Oc1c(oc2c(c1=O)c(O)cc(c2)O)c1ccc(cc1)O	P10635,P08684	2
7-Hydroxy-2-(4-Hydroxyphenyl)Chromen-4-One	Flavones	7-hydroxy-2-(4-hydroxyphenyl)chromen-4-one	C15H10O4	LCAWNFIFMLXZPQ-UHFFFAOYSA-N	InChI=1S/C15H10O4/c16-10-3-1-9(2-4-10)14-8-13(18)12-6-5-11(17)7-15(12)19-14/h1-8,16-17H	Oc1ccc(cc1)c1cc(=O)c2c(o1)cc(cc2)O	Q03181,Q16637,Q16769,P06280,Q9Y3R4,P11511,P00352,Q07869,Q99714,P28482,P27338,P37231,P18031,P06239,B2RXH2	15
4-[5-(3-Hydroxypropyl)-1-Benzofuran-2-Yl]-3-Methoxyphenol	Others	4-[5-(3-hydroxypropyl)-1-benzofuran-2-yl]-3-methoxyphenol	C18H18O4	CLYYUOMSXIPPJS-UHFFFAOYSA-N	InChI=1S/C18H18O4/c1-21-17-11-14(20)5-6-15(17)18-10-13-9-12(3-2-8-19)4-7-16(13)22-18/h4-7,9-11,19-20H,2-3,8H2,1H3	OCCCc1ccc2c(c1)cc(o2)c1ccc(cc1OC)O	P09917	1
Abyssinoflavanone Vi	Flavanones	(2S)-5,7-dihydroxy-2-[7-(3-methylbut-2-enyl)-1-benzofuran-5-yl]-2,3-dihydrochromen-4-one	C22H20O5	MXJNLOCPZJNQMY-IBGZPJMESA-N	InChI=1S/C22H20O5/c1-12(2)3-4-13-7-15(8-14-5-6-26-22(13)14)19-11-18(25)21-17(24)9-16(23)10-20(21)27-19/h3,5-10,19,23-24H,4,11H2,1-2H3/t19-/m0/s1	CC(=CCc1cc(cc2c1occ2)[C@@H]1CC(=O)c2c(O1)cc(cc2O)O)C	P18031	1
Sigmoidin F	Flavanones	(2R)-5,7-dihydroxy-2-[8-hydroxy-2,2-dimethyl-7-(3-methylbut-2-enyl)chromen-6-yl]-2,3-dihydrochromen-4-one	C25H26O6	WPVMLODCRMLWMB-HXUWFJFHSA-N	InChI=1S/C25H26O6/c1-13(2)5-6-16-17(9-14-7-8-25(3,4)31-24(14)23(16)29)20-12-19(28)22-18(27)10-15(26)11-21(22)30-20/h5,7-11,20,26-27,29H,6,12H2,1-4H3/t20-/m1/s1	CC(=CCc1c(cc2c(c1O)OC(C=C2)(C)C)[C@H]1CC(=O)c2c(O1)cc(cc2O)O)C	P18031	1
Hyperoside	Flavonols	2-(3,4-dihydroxyphenyl)-5,7-dihydroxy-3-[(2S,3R,4S,5R,6R)-3,4,5-trihydroxy-6-(hydroxymethyl)oxan-2-yl]oxychromen-4-one	C21H20O12	OVSQVDMCBVZWGM-DTGCRPNFSA-N	InChI=1S/C21H20O12/c22-6-13-15(27)17(29)18(30)21(32-13)33-20-16(28)14-11(26)4-8(23)5-12(14)31-19(20)7-1-2-9(24)10(25)3-7/h1-5,13,15,17-18,21-27,29-30H,6H2/t13-,15+,17+,18-,21+/m1/s1	OC[C@H]1O[C@@H](Oc2c(oc3c(c2=O)c(O)cc(c3)O)c2ccc(c(c2)O)O)[C@@H]([C@H]([C@H]1O)O)O	P04062,P15121,P06746,Q15078,P02545,B2RXH2,Q9UIF8,P28482,P34913,P08908,P10636,Q96KQ7,P10253	13
n.a.	Flavan-3-ols	</td></tr>\r\n\t\t\t\t<tr><td align=right><b>Synonyms: &nbsp</b>	C60H48O24	MIKRORKCMXNOCX-DYNSHIFESA-N	InChI=1S/C60H48O24/c61-23-13-35(72)41-39(15-23)80-54(20-2-6-27(64)32(69)10-20)51(77)44(41)48-50(76)47-45(43-37(74)18-30(67)25-17-38(75)53(81-56(25)43)19-1-5-26(63)31(68)9-19)52(78)55(21-3-7-28(65)33(70)11-21)82-57(47)49-46-42-36(73)14-24(62)16-40(42)83-60(59(46)79,84-58(48)49)22-4-8-29(66)34(71)12-22/h1-16,18,38,44-46,51-55,59,61-79H,17H2/t38-,44-,45+,46-,51-,52-,53-,54-,55-,59-,60+/m1/s1	Oc1cc(O)c2c(c1)O[C@@H]([C@@H]([C@H]2c1c(O)c2[C@@H]([C@@H](O)[C@H](Oc2c2c1O[C@@]1(Oc3c([C@H]2[C@H]1O)c(O)cc(c3)O)c1ccc(c(c1)O)O)c1ccc(c(c1)O)O)c1c(O)cc(c2c1O[C@@H]([C@@H](C2)O)c1ccc(c(c1)O)O)O)O)c1ccc(c(c1)O)O	P35354	1
Tilianine	Flavones	5-hydroxy-2-(4-methoxyphenyl)-7-[(2S,3R,4S,5S,6R)-3,4,5-trihydroxy-6-(hydroxymethyl)oxan-2-yl]oxychromen-4-one	C22H22O10	NLZCOTZRUWYPTP-MIUGBVLSSA-N	InChI=1S/C22H22O10/c1-29-11-4-2-10(3-5-11)15-8-14(25)18-13(24)6-12(7-16(18)31-15)30-22-21(28)20(27)19(26)17(9-23)32-22/h2-8,17,19-24,26-28H,9H2,1H3/t17-,19-,20+,21-,22-/m1/s1	OC[C@H]1O[C@@H](Oc2cc(O)c3c(c2)oc(cc3=O)c2ccc(cc2)OC)[C@@H]([C@H]([C@@H]1O)O)O	P00747	1
Retusin	Flavonols	2-(3,4-dimethoxyphenyl)-5-hydroxy-3,7-dimethoxychromen-4-one	C19H18O7	HHGPYJLEJGNWJA-UHFFFAOYSA-N	InChI=1S/C19H18O7/c1-22-11-8-12(20)16-15(9-11)26-18(19(25-4)17(16)21)10-5-6-13(23-2)14(7-10)24-3/h5-9,20H,1-4H3	COc1cc(O)c2c(c1)oc(c(c2=O)OC)c1ccc(c(c1)OC)OC	Q9UNQ0,P08183,P33527	3
Ebenfuran I	Others	4-(5-hydroxy-6-methoxy-1-benzofuran-2-yl)benzene-1,3-diol	C15H12O5	KJOUKFLQGCLIOG-UHFFFAOYSA-N	InChI=1S/C15H12O5/c1-19-15-7-13-8(4-12(15)18)5-14(20-13)10-3-2-9(16)6-11(10)17/h2-7,16-18H,1H3	COc1cc2oc(cc2cc1O)c1ccc(cc1O)O	P03372	1
[(2R,3S,4R,5R,6S)-2-[4-(5,7-dihydroxy-4-oxochromen-2-yl)phenoxy]-4,5-dihydroxy-6-(hydroxymethyl)oxan-3-yl] (E)-3-(4-hydroxyphenyl)prop-2-enoate	Flavones	[(2R,3S,4R,5R,6S)-2-[4-(5,7-dihydroxy-4-oxochromen-2-yl)phenoxy]-4,5-dihydroxy-6-(hydroxymethyl)oxan-3-yl] (E)-3-(4-hydroxyphenyl)prop-2-enoate	C30H26O12	FITSQGVBTPBMCU-CMAQPADGSA-N	InChI=1S/C30H26O12/c31-14-24-27(37)28(38)29(42-25(36)10-3-15-1-6-17(32)7-2-15)30(41-24)39-19-8-4-16(5-9-19)22-13-21(35)26-20(34)11-18(33)12-23(26)40-22/h1-13,24,27-34,37-38H,14H2/b10-3+/t24-,27-,28+,29-,30-/m0/s1	OC[C@@H]1O[C@H](Oc2ccc(cc2)c2cc(=O)c3c(o2)cc(cc3O)O)[C@H]([C@@H]([C@H]1O)O)OC(=O)/C=C/c1ccc(cc1)O	P47989	1
Sigmoidin A	Flavanones	(2S)-2-[3,4-dihydroxy-2,5-bis(3-methylbut-2-enyl)phenyl]-5,7-dihydroxy-2,3-dihydrochromen-4-one	C25H28O6	BVHLNRAYBCPKOY-NRFANRHFSA-N	InChI=1S/C25H28O6/c1-13(2)5-7-15-9-18(17(8-6-14(3)4)25(30)24(15)29)21-12-20(28)23-19(27)10-16(26)11-22(23)31-21/h5-6,9-11,21,26-27,29-30H,7-8,12H2,1-4H3/t21-/m0/s1	CC(=CCc1c(cc(c(c1O)O)CC=C(C)C)[C@@H]1CC(=O)c2c(O1)cc(cc2O)O)C	P18031	1
Isoglycycoumarin	Others	7-(2,4-dihydroxyphenyl)-5-methoxy-2,2-dimethyl-3,4-dihydropyrano[3,2-g]chromen-8-one	C21H20O6	PHHAXWBLJNBVNS-UHFFFAOYSA-N	InChI=1S/C21H20O6/c1-21(2)7-6-13-18(27-21)10-17-15(19(13)25-3)9-14(20(24)26-17)12-5-4-11(22)8-16(12)23/h4-5,8-10,22-23H,6-7H2,1-3H3	COc1c2CCC(Oc2cc2c1cc(c(=O)o2)c1ccc(cc1O)O)(C)C	Q16236	1
3,4,5-Trihydroxy-Benzoic Acid (2S,3S)-2-(3,4-Dihydroxy-Phenyl)-5,7-Dihydroxy-Chroman-3-Yl Ester	Flavan-3-ols	[(2S,3S)-2-(3,4-dihydroxyphenyl)-5,7-dihydroxy-3,4-dihydro-2H-chromen-3-yl] 3,4,5-trihydroxybenzoate	C22H18O10	LSHVYAFMTMFKBA-FPOVZHCZSA-N	InChI=1S/C22H18O10/c23-11-6-14(25)12-8-19(32-22(30)10-4-16(27)20(29)17(28)5-10)21(31-18(12)7-11)9-1-2-13(24)15(26)3-9/h1-7,19,21,23-29H,8H2/t19-,21-/m0/s1	Oc1cc(O)c2c(c1)O[C@H]([C@H](C2)OC(=O)c1cc(O)c(c(c1)O)O)c1ccc(c(c1)O)O	P56817	1
Cudraflavone	Flavones	8-(2,4-dihydroxyphenyl)-5-hydroxy-2,2-dimethyl-7-(3-methylbut-2-enyl)pyrano[3,2-g]chromen-6-one	C25H24O6	XIWCDUHPYMOFIL-UHFFFAOYSA-N	InChI=1S/C25H24O6/c1-13(2)5-7-17-23(29)21-20(30-24(17)15-8-6-14(26)11-18(15)27)12-19-16(22(21)28)9-10-25(3,4)31-19/h5-6,8-12,26-28H,7H2,1-4H3	CC(=CCc1c(oc2c(c1=O)c(O)c1c(c2)OC(C=C1)(C)C)c1ccc(cc1O)O)C	P35354,P43220,O75164,P11473,P84022,O75908,O75496,Q13148,Q99700,Q9UNA4	10
Cyanidin	Others	2-(3,4-dihydroxyphenyl)chromenylium-3,5,7-triol	C15H10O6	VEVZSMAEJFVWIL-UHFFFAOYSA-O	InChI=1S/C15H10O6/c16-8-4-11(18)9-6-13(20)15(21-14(9)5-8)7-1-2-10(17)12(19)3-7/h1-6H,(H4-,16,17,18,19,20)/p+1	Oc1cc(O)c2c(c1)[o+]c(c(c2)O)c1ccc(c(c1)O)O	P53355,P28907,P55055,P55055,P23219,P35354,P00734,Q13133	8
Scutellarin	Flavones	(2S,3S,4S,5R,6S)-6-[5,6-dihydroxy-2-(4-hydroxyphenyl)-4-oxochromen-7-yl]oxy-3,4,5-trihydroxyoxane-2-carboxylic acid	C21H18O12	DJSISFGPUUYILV-ZFORQUDYSA-N	InChI=1S/C21H18O12/c22-8-3-1-7(2-4-8)10-5-9(23)13-11(31-10)6-12(14(24)15(13)25)32-21-18(28)16(26)17(27)19(33-21)20(29)30/h1-6,16-19,21-22,24-28H,(H,29,30)/t16-,17-,18+,19-,21+/m0/s1	OC(=O)[C@H]1O[C@@H](Oc2cc3oc(cc(=O)c3c(c2O)O)c2ccc(cc2)O)[C@@H]([C@H]([C@@H]1O)O)O	P03372,Q9HAW8,O94956,Q9UNQ0,P34969,P22309,O15438,Q92887,O75874	9
Silibinin	Flavanonol	3,5,7-trihydroxy-2-[3-(4-hydroxy-3-methoxyphenyl)-2-(hydroxymethyl)-2,3-dihydro-1,4-benzodioxin-6-yl]-2,3-dihydrochromen-4-one	C25H22O10	SEBFKMXJBCUCAI-UHFFFAOYSA-N	InChI=1S/C25H22O10/c1-32-17-6-11(2-4-14(17)28)24-20(10-26)33-16-5-3-12(7-18(16)34-24)25-23(31)22(30)21-15(29)8-13(27)9-19(21)35-25/h2-9,20,23-29,31H,10H2,1H3	OCC1Oc2ccc(cc2OC1c1ccc(c(c1)OC)O)C1Oc2cc(O)cc(c2C(=O)C1O)O	P27695,P35218,Q03181,Q9NPD5,Q9ULX7,Q9Y6L6,P43166,Q9NUW8,P47989,P23280,Q16665,P33527,P10275,P16050,P00734,P84022,P17405,Q16790,Q92887,P00915,P00352,P02545,P10145,O94956,P16473,P07451,O75496,Q9UIF8,Q99714,Q9Y2D0,P22748,P10828,P11712,O43570,P15428,P08684,P10636,P00918,P10253,P35030,Q16236,Q8N1Q1,Q96KQ7	43
Glyasperin C	Others	4-[(3R)-7-hydroxy-5-methoxy-6-(3-methylbut-2-enyl)-3,4-dihydro-2H-chromen-3-yl]benzene-1,3-diol	C21H24O5	RCZMWVKBVFOCEE-ZDUSSCGKSA-N	InChI=1S/C21H24O5/c1-12(2)4-6-16-19(24)10-20-17(21(16)25-3)8-13(11-26-20)15-7-5-14(22)9-18(15)23/h4-5,7,9-10,13,22-24H,6,8,11H2,1-3H3/t13-/m0/s1	COc1c2C[C@@H](COc2cc(c1CC=C(C)C)O)c1ccc(cc1O)O	P14679	1
b"4-O-Methyldiplacol"	Flavanonol	(2R,3R)-6-[(2E)-3,7-dimethylocta-2,6-dienyl]-3,5,7-trihydroxy-2-(3-hydroxy-4-methoxyphenyl)-2,3-dihydrochromen-4-one	C26H30O7	HXSRAKGAZOSYEH-WFQOKMFZSA-N	InChI=1S/C26H30O7/c1-14(2)6-5-7-15(3)8-10-17-18(27)13-21-22(23(17)29)24(30)25(31)26(33-21)16-9-11-20(32-4)19(28)12-16/h6,8-9,11-13,25-29,31H,5,7,10H2,1-4H3/b15-8+/t25-,26+/m0/s1	COc1ccc(cc1O)[C@H]1Oc2cc(O)c(c(c2C(=O)[C@@H]1O)O)C/C=C(/CCC=C(C)C)C	P22303	1
Gancaonin I	Others	4-[4,6-dimethoxy-5-(3-methylbut-2-enyl)-1-benzofuran-2-yl]benzene-1,3-diol	C21H22O5	DKVBYQAVNNRVNN-UHFFFAOYSA-N	InChI=1S/C21H22O5/c1-12(2)5-7-15-18(24-3)11-20-16(21(15)25-4)10-19(26-20)14-8-6-13(22)9-17(14)23/h5-6,8-11,22-23H,7H2,1-4H3	COc1c(CC=C(C)C)c(OC)cc2c1cc(o2)c1ccc(cc1O)O	P18031	1
Amentoflavone	Flavones	8-[5-(5,7-dihydroxy-4-oxochromen-2-yl)-2-hydroxyphenyl]-5,7-dihydroxy-2-(4-hydroxyphenyl)chromen-4-one	C30H18O10	YUSWMAULDXZHPY-UHFFFAOYSA-N	InChI=1S/C30H18O10/c31-15-4-1-13(2-5-15)24-12-23(38)29-21(36)10-20(35)27(30(29)40-24)17-7-14(3-6-18(17)33)25-11-22(37)28-19(34)8-16(32)9-26(28)39-25/h1-12,31-36H	Oc1ccc(cc1)c1cc(=O)c2c(o1)c(c(cc2O)O)c1cc(ccc1O)c1cc(=O)c2c(o1)cc(cc2O)O	P15692,P18507,P28335,P41143,P55072,P35462,P53350,O75164,P39748,Q03431,P84022,P17405,P00352,Q16445,P63092,Q07820,O95398,Q9UNA4,P43235,P14555,P10828,Q9Y253,P18031,P19174,Q03164,Q14191,P10636,Q9UBT6,P56817,P49763	30
Isorhamnetin	Flavonols	3,5,7-trihydroxy-2-(4-hydroxy-3-methoxyphenyl)chromen-4-one	C16H12O7	IZQSVPBOUDKVDZ-UHFFFAOYSA-N	InChI=1S/C16H12O7/c1-22-11-4-7(2-3-9(11)18)16-15(21)14(20)13-10(19)5-8(17)6-12(13)23-16/h2-6,17-19,21H,1H3	COc1cc(ccc1O)c1oc2cc(O)cc(c2c(=O)c1O)O	P27695,P43166,P47989,P39748,P04798,P04745,P22748,O43570,Q03164,Q9UBT6,P00918,P05177,Q16678	13
Kaempferol-3-O-(4-O-Acetyl-Alpha-L-Rhamnopyranoside)	Flavonols	[(2S,3R,4S,5R,6S)-6-[5,7-dihydroxy-2-(4-hydroxyphenyl)-4-oxochromen-3-yl]oxy-4,5-dihydroxy-2-methyloxan-3-yl] acetate	C23H22O11	AGQLGMXLTFMOAP-OEHKQELHSA-N	InChI=1S/C23H22O11/c1-9-20(32-10(2)24)18(29)19(30)23(31-9)34-22-17(28)16-14(27)7-13(26)8-15(16)33-21(22)11-3-5-12(25)6-4-11/h3-9,18-20,23,25-27,29-30H,1-2H3/t9-,18-,19+,20-,23-/m0/s1	CC(=O)O[C@H]1[C@H](C)O[C@H]([C@@H]([C@@H]1O)O)Oc1c(oc2c(c1=O)c(O)cc(c2)O)c1ccc(cc1)O	P10635,P08684	2
b"5,6,3-Trihydroxy-3,7,4-Trimethoxyflavone"	Flavonols	5,6-dihydroxy-2-(3-hydroxy-4-methoxyphenyl)-3,7-dimethoxychromen-4-one	C18H16O8	UQBUUCDVKDSHCE-UHFFFAOYSA-N	InChI=1S/C18H16O8/c1-23-10-5-4-8(6-9(10)19)17-18(25-3)16(22)13-11(26-17)7-12(24-2)14(20)15(13)21/h4-7,19-21H,1-3H3	COc1ccc(cc1O)c1oc2cc(OC)c(c(c2c(=O)c1OC)O)O	P19838	1
Kayaflavone	Flavones	8-[5-(5,7-dihydroxy-4-oxochromen-2-yl)-2-methoxyphenyl]-5-hydroxy-7-methoxy-2-(4-methoxyphenyl)chromen-4-one	C33H24O10	RROKRDUARFDCDH-UHFFFAOYSA-N	InChI=1S/C33H24O10/c1-39-19-7-4-16(5-8-19)26-14-23(37)32-24(38)15-28(41-3)30(33(32)43-26)20-10-17(6-9-25(20)40-2)27-13-22(36)31-21(35)11-18(34)12-29(31)42-27/h4-15,34-35,38H,1-3H3	COc1ccc(cc1)c1cc(=O)c2c(o1)c(c(cc2O)OC)c1cc(ccc1OC)c1cc(=O)c2c(o1)cc(cc2O)O	P56817	1
Erythraddison Iv	Others	(3S)-5,7-dihydroxy-3-(7-methoxy-2,2-dimethylchromen-6-yl)-2,3-dihydrochromen-4-one	C21H20O6	WDJAZIFUJKIZSU-CQSZACIVSA-N	InChI=1S/C21H20O6/c1-21(2)5-4-11-6-13(17(25-3)9-16(11)27-21)14-10-26-18-8-12(22)7-15(23)19(18)20(14)24/h4-9,14,22-23H,10H2,1-3H3/t14-/m1/s1	COc1cc2OC(C)(C)C=Cc2cc1[C@H]1COc2c(C1=O)c(O)cc(c2)O	P18031	1
Cyclomorusin	Flavones	</td></tr>\r\n\t\t\t\t<tr><td align=right><b>Synonyms: &nbsp</b>	C25H22O6	GDQXJMLXEYSICD-UHFFFAOYSA-N	InChI=1S/C25H22O6/c1-12(2)9-19-21-22(28)20-16(27)11-18-15(7-8-25(3,4)31-18)23(20)30-24(21)14-6-5-13(26)10-17(14)29-19/h5-11,19,26-27H,1-4H3	CC(=CC1Oc2cc(O)ccc2c2c1c(=O)c1c(o2)c2C=CC(Oc2cc1O)(C)C)C	P06276,P22303,P56817	3
b"2-(4-Hydroxybenzylidene)-6-Hydroxybenzofuran-3(2H)-One"	Others	(2Z)-6-hydroxy-2-[(4-hydroxyphenyl)methylidene]-1-benzofuran-3-one	C15H10O4	KEZLDSPIRVZOKZ-AUWJEWJLSA-N	InChI=1S/C15H10O4/c16-10-3-1-9(2-4-10)7-14-15(18)12-6-5-11(17)8-13(12)19-14/h1-8,16-17H/b14-7-	Oc1ccc(cc1)/C=C/1Oc2c(C1=O)ccc(c2)O	P14679,P15559	2
Wedelolactone	Others	1,8,9-trihydroxy-3-methoxy-[1]benzofuro[3,2-c]chromen-6-one	C16H10O7	XQDCKJKKMFWXGB-UHFFFAOYSA-N	InChI=1S/C16H10O7/c1-21-6-2-10(19)14-12(3-6)23-16(20)13-7-4-8(17)9(18)5-11(7)22-15(13)14/h2-5,17-19H,1H3	COc1cc(O)c2c(c1)oc(=O)c1c2oc2c1cc(c(c2)O)O	P27695,Q92830,Q9NUW8,P16152,P54132,P46063,P10828,Q13951,Q9UBT6,O15111,Q03164,P09917,P11021	13
5,7-Dihydroxy-2-(4-Hydroxy-3-Methoxyphenyl)-3,6,8-Trimethoxychromen-4-One	Flavonols	5,7-dihydroxy-2-(4-hydroxy-3-methoxyphenyl)-3,6,8-trimethoxychromen-4-one	C19H18O9	DEQJJTUOVGHXHW-UHFFFAOYSA-N	InChI=1S/C19H18O9/c1-24-10-7-8(5-6-9(10)20)15-18(26-3)13(22)11-12(21)17(25-2)14(23)19(27-4)16(11)28-15/h5-7,20-21,23H,1-4H3	COc1cc(ccc1O)c1oc2c(OC)c(O)c(c(c2c(=O)c1OC)O)OC	Q9BUF5	1
b"4-Methoxyglabridin"	Others	2-[(3R)-8,8-dimethyl-3,4-dihydro-2H-pyrano[2,3-f]chromen-3-yl]-5-methoxyphenol	C21H22O4	ZZAIPFIGEGQNHP-AWEZNQCLSA-N	InChI=1S/C21H22O4/c1-21(2)9-8-17-19(25-21)7-4-13-10-14(12-24-20(13)17)16-6-5-15(23-3)11-18(16)22/h4-9,11,14,22H,10,12H2,1-3H3/t14-/m0/s1	COc1ccc(c(c1)O)[C@@H]1COc2c(C1)ccc1c2C=CC(O1)(C)C	P18031	1
2-(3,4-Dihydroxyphenyl)-5,7-Dihydroxy-3-[3,4,5-Trihydroxy-6-[(3,4,5-Trihydroxy-6-Methyloxan-2-Yl)Oxymethyl]Oxan-2-Yl]Oxychromen-4-One	Flavonols	2-(3,4-dihydroxyphenyl)-5,7-dihydroxy-3-[3,4,5-trihydroxy-6-[(3,4,5-trihydroxy-6-methyloxan-2-yl)oxymethyl]oxan-2-yl]oxychromen-4-one	C27H30O16	IKGXIBQEEMLURG-UHFFFAOYSA-N	InChI=1S/C27H30O16/c1-8-17(32)20(35)22(37)26(40-8)39-7-15-18(33)21(36)23(38)27(42-15)43-25-19(34)16-13(31)5-10(28)6-14(16)41-24(25)9-2-3-11(29)12(30)4-9/h2-6,8,15,17-18,20-23,26-33,35-38H,7H2,1H3	Oc1cc(O)c2c(c1)oc(c(c2=O)OC1OC(COC2OC(C)C(C(C2O)O)O)C(C(C1O)O)O)c1ccc(c(c1)O)O	P27695,Q9UBT6,P10636,P08684,B2RXH2	5
Sanggenon G	Flavanones	(2S)-6-[(1S,5R,6S)-6-(2,4-dihydroxybenzoyl)-5-(2,4-dihydroxyphenyl)-3-(4-methylpent-3-enyl)cyclohex-2-en-1-yl]-2-(2,5-dihydroxyphenyl)-5,7-dihydroxy-2,3-dihydrochromen-4-one	C40H38O11	ZXTQHAMOONDJDJ-YTAXAHCSSA-N	InChI=1S/C40H38O11/c1-19(2)4-3-5-20-12-26(24-9-6-22(42)15-30(24)45)36(39(49)25-10-7-23(43)16-31(25)46)28(13-20)37-32(47)18-35-38(40(37)50)33(48)17-34(51-35)27-14-21(41)8-11-29(27)44/h4,6-11,13-16,18,26,28,34,36,41-47,50H,3,5,12,17H2,1-2H3/t26-,28-,34-,36-/m0/s1	CC(=CCCC1=C[C@H](c2c(O)cc3c(c2O)C(=O)C[C@H](O3)c2cc(O)ccc2O)[C@H]([C@@H](C1)c1ccc(cc1O)O)C(=O)c1ccc(cc1O)O)C	P18031,P51452	2
Hesperetin	Flavanones	(2S)-5,7-dihydroxy-2-(3-hydroxy-4-methoxyphenyl)-2,3-dihydrochromen-4-one	C16H14O6	AIONOLUJZLIMTK-AWEZNQCLSA-N	InChI=1S/C16H14O6/c1-21-13-3-2-8(4-10(13)18)14-7-12(20)16-11(19)5-9(17)6-15(16)22-14/h2-6,14,17-19H,7H2,1H3/t14-/m0/s1	COc1ccc(cc1O)[C@@H]1CC(=O)c2c(O1)cc(cc2O)O	Q03181,Q9NPD5,P49841,P43166,Q9Y6L6,P33261,P51151,P83916,P22303,Q03431,P04798,P14061,P00352,P37059,Q07869,P16473,Q13315,P04745,Q99714,P28482,P22748,Q96QE3,P37231,O43570,P37173,P05177,Q16678	27
Kaempferol 3-O-[Alpha-L-Rhamnopyranosyl(1->2)-Beta-D-Glucopyranosyl]-7-O-Alpha-L-Rhamnopyranoside	Flavonols	3-[(2S,3R,4S,5S,6R)-4,5-dihydroxy-6-(hydroxymethyl)-3-[(2S,3R,4R,5R,6S)-3,4,5-trihydroxy-6-methyloxan-2-yl]oxyoxan-2-yl]oxy-5-hydroxy-2-(4-hydroxyphenyl)-7-[(2S,3R,4R,5R,6S)-3,4,5-trihydroxy-6-methyloxan-2-yl]oxychromen-4-one	C33H40O19	DDELFAUOHDSZJL-CPGGTDLHSA-N	InChI=1S/C33H40O19/c1-10-19(37)23(41)26(44)31(46-10)48-14-7-15(36)18-16(8-14)49-28(12-3-5-13(35)6-4-12)29(22(18)40)51-33-30(25(43)21(39)17(9-34)50-33)52-32-27(45)24(42)20(38)11(2)47-32/h3-8,10-11,17,19-21,23-27,30-39,41-45H,9H2,1-2H3/t10-,11-,17+,19-,20-,21+,23+,24+,25-,26+,27+,30+,31-,32-,33-/m0/s1	OC[C@H]1O[C@@H](Oc2c(oc3c(c2=O)c(O)cc(c3)O[C@@H]2O[C@@H](C)[C@@H]([C@H]([C@H]2O)O)O)c2ccc(cc2)O)[C@@H]([C@H]([C@@H]1O)O)O[C@@H]1O[C@@H](C)[C@@H]([C@H]([C@H]1O)O)O	P11387	1
Gallocatechin Gallate	Flavan-3-ols	[(2S,3R)-5,7-dihydroxy-2-(3,4,5-trihydroxyphenyl)-3,4-dihydro-2H-chromen-3-yl] 3,4,5-trihydroxybenzoate	C22H18O11	WMBWREPUVVBILR-NQIIRXRSSA-N	InChI=1S/C22H18O11/c23-10-5-12(24)11-7-18(33-22(31)9-3-15(27)20(30)16(28)4-9)21(32-17(11)6-10)8-1-13(25)19(29)14(26)2-8/h1-6,18,21,23-30H,7H2/t18-,21+/m1/s1	Oc1cc(O)c2c(c1)O[C@H]([C@@H](C2)OC(=O)c1cc(O)c(c(c1)O)O)c1cc(O)c(c(c1)O)O	P10415,P08238,P52209,P08581	4
Kushenol N	Flavanonol	(2R,3S)-2-(2,4-dihydroxyphenyl)-3,7-dihydroxy-5-methoxy-8-(5-methyl-2-prop-1-en-2-ylhex-4-enyl)-2,3-dihydrochromen-4-one	C26H30O7	QKEDJCCCNZWOBS-LMFRUQSNSA-N	InChI=1S/C26H30O7/c1-13(2)6-7-15(14(3)4)10-18-20(29)12-21(32-5)22-23(30)24(31)26(33-25(18)22)17-9-8-16(27)11-19(17)28/h6,8-9,11-12,15,24,26-29,31H,3,7,10H2,1-2,4-5H3/t15?,24-,26-/m1/s1	COc1cc(O)c(c2c1C(=O)[C@@H](O)[C@H](O2)c1ccc(cc1O)O)CC(C(=C)C)CC=C(C)C	P31639,P13866	2
n.a.	Flavonols	</td></tr>\r\n\t\t\t\t<tr><td align=right><b>Synonyms: &nbsp</b>	C22H22O12	JXASPPWQHFOWPL-LFXZADKFSA-N	InChI=1S/C22H22O12/c1-31-12-3-2-8(4-10(12)25)20-21(17(28)15-11(26)5-9(24)6-13(15)32-20)34-22-19(30)18(29)16(27)14(7-23)33-22/h2-6,14,16,18-19,22-27,29-30H,7H2,1H3/t14-,16-,18+,19-,22+/m1/s1	OC[C@H]1O[C@@H](Oc2c(oc3c(c2=O)c(O)cc(c3)O)c2ccc(c(c2)O)OC)[C@@H]([C@H]([C@@H]1O)O)O	P00747	1
3,7-O-Dimethylquercetin	Flavonols	2-(3,4-dihydroxyphenyl)-5-hydroxy-3,7-dimethoxychromen-4-one	C17H14O7	LUJAXSNNYBCFEE-UHFFFAOYSA-N	InChI=1S/C17H14O7/c1-22-9-6-12(20)14-13(7-9)24-16(17(23-2)15(14)21)8-3-4-10(18)11(19)5-8/h3-7,18-20H,1-2H3	COc1cc(O)c2c(c1)oc(c(c2=O)OC)c1ccc(c(c1)O)O	Q9NPH5,P00747	2
n.a.	Others	</td></tr>\r\n\t\t\t\t<tr><td align=right><b>Synonyms: &nbsp</b>	C17H14O6	LZMRDTLRSDRUSU-SJORKVTESA-N	InChI=1S/C17H14O6/c1-19-9-2-3-10-12(4-9)20-7-17(18)11-5-14-15(22-8-21-14)6-13(11)23-16(10)17/h2-6,16,18H,7-8H2,1H3/t16-,17+/m1/s1	COc1ccc2c(c1)OC[C@]1([C@@H]2Oc2c1cc1c(c2)OCO1)O	P03372	1
Cudraflavanone D	Flavanones	(2S)-2-[2,4-dihydroxy-5-(3-methylbut-2-enyl)phenyl]-5,7-dihydroxy-6-(3-methylbut-2-enyl)-2,3-dihydrochromen-4-one	C25H28O6	XLHAGJGNSIEVFB-QFIPXVFZSA-N	InChI=1S/C25H28O6/c1-13(2)5-7-15-9-17(19(27)10-18(15)26)22-12-21(29)24-23(31-22)11-20(28)16(25(24)30)8-6-14(3)4/h5-6,9-11,22,26-28,30H,7-8,12H2,1-4H3/t22-/m0/s1	CC(=CCc1cc([C@@H]2CC(=O)c3c(O2)cc(c(c3O)CC=C(C)C)O)c(cc1O)O)C	O75908	1
(2R)-2-(3,4-Dihydroxyphenyl)-3,5,7-Trihydroxy-2,3-Dihydrochromen-4-One	Flavanonol	(2R)-2-(3,4-dihydroxyphenyl)-3,5,7-trihydroxy-2,3-dihydrochromen-4-one	C15H12O7	CXQWRCVTCMQVQX-YSSOQSIOSA-N	InChI=1S/C15H12O7/c16-7-4-10(19)12-11(5-7)22-15(14(21)13(12)20)6-1-2-8(17)9(18)3-6/h1-5,14-19,21H/t14?,15-/m1/s1	Oc1cc2O[C@H](c3ccc(c(c3)O)O)C(C(=O)c2c(c1)O)O	P27695,Q03164,Q9UBT6,P46063	4
Eriodictyol	Flavanones	(2S)-2-(3,4-dihydroxyphenyl)-5,7-dihydroxy-2,3-dihydrochromen-4-one	C15H12O6	SBHXYTNGIZCORC-ZDUSSCGKSA-N	InChI=1S/C15H12O6/c16-8-4-11(19)15-12(20)6-13(21-14(15)5-8)7-1-2-9(17)10(18)3-7/h1-5,13,16-19H,6H2/t13-/m0/s1	Oc1cc2O[C@@H](CC(=O)c2c(c1)O)c1ccc(c(c1)O)O	P43166,P36888,P22303,P04798,P22748,O43570,P05177,Q16678	8
Astragalin	Flavonols	5,7-dihydroxy-2-(4-hydroxyphenyl)-3-[(2S,3R,4S,5S,6R)-3,4,5-trihydroxy-6-(hydroxymethyl)oxan-2-yl]oxychromen-4-one	C21H20O11	JPUKWEQWGBDDQB-QSOFNFLRSA-N	InChI=1S/C21H20O11/c22-7-13-15(26)17(28)18(29)21(31-13)32-20-16(27)14-11(25)5-10(24)6-12(14)30-19(20)8-1-3-9(23)4-2-8/h1-6,13,15,17-18,21-26,28-29H,7H2/t13-,15-,17+,18-,21+/m1/s1	OC[C@H]1O[C@@H](Oc2c(oc3c(c2=O)c(O)cc(c3)O)c2ccc(cc2)O)[C@@H]([C@H]([C@@H]1O)O)O	P27695,P15121,P43166,P00915,O95398,P34913,P22748,Q96QE3,O43570,P01215,P00918,P07237,Q9UNA4	13
Fisetin	Flavonols	2-(3,4-dihydroxyphenyl)-3,7-dihydroxychromen-4-one	C15H10O6	XHEFDIBZLJXQHF-UHFFFAOYSA-N	InChI=1S/C15H10O6/c16-8-2-3-9-12(6-8)21-15(14(20)13(9)19)7-1-4-10(17)11(18)5-7/h1-6,16-18,20H	Oc1ccc2c(c1)oc(c(c2=O)O)c1ccc(c(c1)O)O	P47989,P24941,P19784,P16050,P22309,P02545,Q99714,P49841,P10636,P27695,P35503,Q9HAW9,Q9NPD5,Q9Y6L6,P18054,P06276,P55210,P11511,P00352,O95067,P04745,P11388,Q03164,P22303,Q9HAW8,P11309,O15296,Q04760,O60656,B2RXH2,Q15078,Q00534,P43405,P46063,Q02880,Q9UBT6	36
Cudraflavanone A	Flavanones	(2S)-5,7-dihydroxy-2-(7-hydroxy-2,2-dimethylchromen-6-yl)-6-(3-methylbut-2-enyl)-2,3-dihydrochromen-4-one	C25H26O6	XPMCEWWRVJLSLM-NRFANRHFSA-N	InChI=1S/C25H26O6/c1-13(2)5-6-15-17(26)11-22-23(24(15)29)19(28)12-21(30-22)16-9-14-7-8-25(3,4)31-20(14)10-18(16)27/h5,7-11,21,26-27,29H,6,12H2,1-4H3/t21-/m0/s1	CC(=CCc1c(O)cc2c(c1O)C(=O)C[C@H](O2)c1cc2C=CC(Oc2cc1O)(C)C)C	O75908,P35610	2
Erystagallin A	Others	(6aS,11aS)-9-methoxy-2,10-bis(3-methylbut-2-enyl)-6,11a-dihydro-[1]benzofuro[3,2-c]chromene-3,6a-diol	C26H30O5	OOAXWUFECWLVEQ-IZZNHLLZSA-N	InChI=1S/C26H30O5/c1-15(2)6-8-17-12-19-23(13-21(17)27)30-14-26(28)20-10-11-22(29-5)18(9-7-16(3)4)24(20)31-25(19)26/h6-7,10-13,25,27-28H,8-9,14H2,1-5H3/t25-,26+/m0/s1	COc1ccc2c(c1CC=C(C)C)O[C@@H]1[C@@]2(O)COc2c1cc(CC=C(C)C)c(c2)O	P18031	1
Rataniaphenol Ii	Others	4-[3-methyl-5-[(E)-prop-1-enyl]-1-benzofuran-2-yl]phenol	C18H16O2	KNFUWJAIDVAYOV-ONEGZZNKSA-N	InChI=1S/C18H16O2/c1-3-4-13-5-10-17-16(11-13)12(2)18(20-17)14-6-8-15(19)9-7-14/h3-11,19H,1-2H3/b4-3+	C/C=C/c1ccc2c(c1)c(C)c(o2)c1ccc(cc1)O	O14684,P10636,P15428,P09917,Q16637,B2RXH2	6
Pachyrrizine	Others	6-(6-methoxy-1,3-benzodioxol-5-yl)furo[3,2-g]chromen-7-one	C19H12O6	PENSQRMNZZWMGV-UHFFFAOYSA-N	InChI=1S/C19H12O6/c1-21-16-8-18-17(23-9-24-18)6-12(16)13-5-11-4-10-2-3-22-14(10)7-15(11)25-19(13)20/h2-8H,9H2,1H3	COc1cc2OCOc2cc1c1cc2cc3ccoc3cc2oc1=O	P55210,Q9UBT6,P08684,Q9NPD5,Q9Y6L6,Q99714	6
Orobol	Isoflavones	3-(3,4-dihydroxyphenyl)-5,7-dihydroxychromen-4-one	C15H10O6	IOYHCQBYQJQBSK-UHFFFAOYSA-N	InChI=1S/C15H10O6/c16-8-4-12(19)14-13(5-8)21-6-9(15(14)20)7-1-2-10(17)11(18)3-7/h1-6,16-19H	Oc1cc(O)c2c(c1)occ(c2=O)c1ccc(c(c1)O)O	Q13332,P00533	2
5,7-Dihydroxy-3-(4-Hydroxyphenyl)-6,8-Bis(3-Methylbut-2-Enyl)Chromen-4-One	Isoflavones	5,7-dihydroxy-3-(4-hydroxyphenyl)-6,8-bis(3-methylbut-2-enyl)chromen-4-one	C25H26O5	UCHYSPNEUSDFQR-UHFFFAOYSA-N	InChI=1S/C25H26O5/c1-14(2)5-11-18-22(27)19(12-6-15(3)4)25-21(23(18)28)24(29)20(13-30-25)16-7-9-17(26)10-8-16/h5-10,13,26-28H,11-12H2,1-4H3	CC(=CCc1c(O)c(CC=C(C)C)c2c(c1O)c(=O)c(co2)c1ccc(cc1)O)C	P04062,P43220,O75164,P84022,O75496,Q96QE3,P18031,P10636,Q16236	9
Macarangin	Flavonols	6-[(2E)-3,7-dimethylocta-2,6-dienyl]-3,5,7-trihydroxy-2-(4-hydroxyphenyl)chromen-4-one	C25H26O6	MBIJQAHZUBUPNM-VIZOYTHASA-N	InChI=1S/C25H26O6/c1-14(2)5-4-6-15(3)7-12-18-19(27)13-20-21(22(18)28)23(29)24(30)25(31-20)16-8-10-17(26)11-9-16/h5,7-11,13,26-28,30H,4,6,12H2,1-3H3/b15-7+	C/C(=CCc1c(O)cc2c(c1O)c(=O)c(c(o2)c1ccc(cc1)O)O)/CCC=C(C)C	Q9UNQ0	1
(2R,3R,4S)-2-(3,4-Dihydroxyphenyl)-4-(2,4,6-Trihydroxyphenyl)Chroman-3,5,7-Triol	Flavan-3-ols	(2R,3R,4S)-2-(3,4-dihydroxyphenyl)-4-(2,4,6-trihydroxyphenyl)-3,4-dihydro-2H-chromene-3,5,7-triol	C21H18O9	OKJJBTUOKCQSPH-PWRODBHTSA-N	InChI=1S/C21H18O9/c22-9-4-13(26)17(14(27)5-9)19-18-15(28)6-10(23)7-16(18)30-21(20(19)29)8-1-2-11(24)12(25)3-8/h1-7,19-29H/t19-,20+,21+/m0/s1	Oc1cc2O[C@H](c3ccc(c(c3)O)O)[C@@H]([C@H](c2c(c1)O)c1c(O)cc(cc1O)O)O	P07998	1
(S)-5-Hydroxy-7-Methoxy-8-Methyl-2-Phenylchroman-4-One	Flavanones	(2S)-5-hydroxy-7-methoxy-8-methyl-2-phenyl-2,3-dihydrochromen-4-one	C17H16O4	SNHQMOIKQSCRFM-HNNXBMFYSA-N	InChI=1S/C17H16O4/c1-10-14(20-2)8-12(18)16-13(19)9-15(21-17(10)16)11-6-4-3-5-7-11/h3-8,15,18H,9H2,1-2H3/t15-/m0/s1	COc1cc(O)c2c(c1C)O[C@@H](CC2=O)c1ccccc1	P11511	1
3,7-Dihydroxyflavone	Flavonols	3,7-dihydroxy-2-phenylchromen-4-one	C15H10O4	UWQJWDYDYIJWKY-UHFFFAOYSA-N	InChI=1S/C15H10O4/c16-10-6-7-11-12(8-10)19-15(14(18)13(11)17)9-4-2-1-3-5-9/h1-8,16,18H	Oc1ccc2c(c1)oc(c(c2=O)O)c1ccccc1	P55210,O94782,Q03164,Q9NPD5,Q9Y6L6,P18054,P16050,Q99714,P48147,B2RXH2	10
b"Astragalin 2-O-Gallate"	Flavonols	[(2S,3R,4S,5S,6R)-2-[5,7-dihydroxy-2-(4-hydroxyphenyl)-4-oxochromen-3-yl]oxy-4,5-dihydroxy-6-(hydroxymethyl)oxan-3-yl] 3,4,5-trihydroxybenzoate	C28H24O15	UWIQWJHBYRTKAL-KQOASZHBSA-N	InChI=1S/C28H24O15/c29-9-18-21(36)23(38)26(42-27(39)11-5-15(33)20(35)16(34)6-11)28(41-18)43-25-22(37)19-14(32)7-13(31)8-17(19)40-24(25)10-1-3-12(30)4-2-10/h1-8,18,21,23,26,28-36,38H,9H2/t18-,21-,23+,26-,28+/m1/s1	OC[C@H]1O[C@@H](Oc2c(oc3c(c2=O)c(O)cc(c3)O)c2ccc(cc2)O)[C@@H]([C@H]([C@@H]1O)O)OC(=O)c1cc(O)c(c(c1)O)O	P34913	1
Sappanone A	Others	(3E)-3-[(3,4-dihydroxyphenyl)methylidene]-7-hydroxychromen-4-one	C16H12O5	KVYZXXBTJHJISR-BJMVGYQFSA-N	InChI=1S/C16H12O5/c17-11-2-3-12-15(7-11)21-8-10(16(12)20)5-9-1-4-13(18)14(19)6-9/h1-7,17-19H,8H2/b10-5+	Oc1ccc2c(c1)OC/C(=Cc1ccc(c(c1)O)O)/C2=O	P21802,P10721,P12931,P11362,P00533,P08581,P35968	7
Centaurein	Flavonols	5-hydroxy-2-(3-hydroxy-4-methoxyphenyl)-3,6-dimethoxy-7-[(2S,3R,4S,5S,6R)-3,4,5-trihydroxy-6-(hydroxymethyl)oxan-2-yl]oxychromen-4-one	C24H26O13	GGMCFLXPZMBJMV-NPVWYNPDSA-N	InChI=1S/C24H26O13/c1-32-11-5-4-9(6-10(11)26)21-23(34-3)18(29)15-12(35-21)7-13(22(33-2)17(15)28)36-24-20(31)19(30)16(27)14(8-25)37-24/h4-7,14,16,19-20,24-28,30-31H,8H2,1-3H3/t14-,16-,19+,20-,24-/m1/s1	OC[C@H]1O[C@@H](Oc2cc3oc(c4ccc(c(c4)O)OC)c(c(=O)c3c(c2OC)O)OC)[C@@H]([C@H]([C@@H]1O)O)O	P15121,Q9NPD5,Q9Y6L6	3
4-Methylabyssinone V	Flavanones	(2S)-5,7-dihydroxy-2-[4-methoxy-3,5-bis(3-methylbut-2-enyl)phenyl]-2,3-dihydrochromen-4-one	C26H30O5	JHEBMTRMMJXPTM-QHCPKHFHSA-N	InChI=1S/C26H30O5/c1-15(2)6-8-17-10-19(11-18(26(17)30-5)9-7-16(3)4)23-14-22(29)25-21(28)12-20(27)13-24(25)31-23/h6-7,10-13,23,27-28H,8-9,14H2,1-5H3/t23-/m0/s1	COc1c(CC=C(C)C)cc(cc1CC=C(C)C)[C@@H]1CC(=O)c2c(O1)cc(cc2O)O	P18031	1
b"5,7,3-Trihydroxy-3,4-Dimethoxyflavone"	Flavonols	5,7-dihydroxy-2-(3-hydroxy-4-methoxyphenyl)-3-methoxychromen-4-one	C17H14O7	ZSPZNFOLWQEVQJ-UHFFFAOYSA-N	InChI=1S/C17H14O7/c1-22-12-4-3-8(5-10(12)19)16-17(23-2)15(21)14-11(20)6-9(18)7-13(14)24-16/h3-7,18-20H,1-2H3	COc1ccc(cc1O)c1oc2cc(O)cc(c2c(=O)c1OC)O	O14763,Q13332,Q9BUF5	3
Chrysin Dimethyl Ether	Flavones	5,7-dimethoxy-2-phenylchromen-4-one	C17H14O4	JRFZSUMZAUHNSL-UHFFFAOYSA-N	InChI=1S/C17H14O4/c1-19-12-8-15(20-2)17-13(18)10-14(21-16(17)9-12)11-6-4-3-5-7-11/h3-10H,1-2H3	COc1cc(OC)c2c(c1)oc(cc2=O)c1ccccc1	Q9NPD5,Q9Y6L6,P51151,P38398,P43220,Q9UNQ0,O15118,Q03431,P00352,Q9UNA4,Q96QE3,Q03164,Q9UBT6,B2RXH2	14
b"(S)-5,7,7-Trihydroxy-8-(3-Hydroxy-3-Methylbutyl)-2,2-Dimethyl-2,6-Bichroman-4-One"	Flavanones	(2S)-5,7-dihydroxy-2-(7-hydroxy-2,2-dimethylchromen-6-yl)-8-(3-hydroxy-3-methylbutyl)-2,3-dihydrochromen-4-one	C25H28O7	YRFONVUVHGLFMJ-NRFANRHFSA-N	InChI=1S/C25H28O7/c1-24(2,30)7-6-14-16(26)10-18(28)22-19(29)12-21(31-23(14)22)15-9-13-5-8-25(3,4)32-20(13)11-17(15)27/h5,8-11,21,26-28,30H,6-7,12H2,1-4H3/t21-/m0/s1	Oc1cc2OC(C)(C)C=Cc2cc1[C@@H]1CC(=O)c2c(O1)c(CCC(O)(C)C)c(cc2O)O	O75908,P35610	2
Quercetin 3,7-Dimethyl Ether	Flavonols	2-(3,4-dihydroxyphenyl)-5,6-dihydroxy-3,7-dimethoxychromen-4-one	C17H14O8	WGWGXVOAFMLMJZ-UHFFFAOYSA-N	InChI=1S/C17H14O8/c1-23-11-6-10-12(14(21)13(11)20)15(22)17(24-2)16(25-10)7-3-4-8(18)9(19)5-7/h3-6,18-21H,1-2H3	COc1cc2oc(c3ccc(c(c3)O)O)c(c(=O)c2c(c1O)O)OC	P15121	1
Eupatorin	Flavones	5-hydroxy-2-(3-hydroxy-4-methoxyphenyl)-6,7-dimethoxychromen-4-one	C18H16O7	KLAOKWJLUQKWIF-UHFFFAOYSA-N	InChI=1S/C18H16O7/c1-22-12-5-4-9(6-10(12)19)13-7-11(20)16-14(25-13)8-15(23-2)18(24-3)17(16)21/h4-8,19,21H,1-3H3	COc1cc2oc(cc(=O)c2c(c1OC)O)c1ccc(c(c1)O)OC	O14965,Q9NPD5,Q9Y6L6,P04798,Q16678,Q96GD4,P35968	7
Abyssinone Ii	Flavanones	(2S)-7-hydroxy-2-[4-hydroxy-3-(3-methylbut-2-enyl)phenyl]-2,3-dihydrochromen-4-one	C20H20O4	NLTOTZSPOYWSSP-IBGZPJMESA-N	InChI=1S/C20H20O4/c1-12(2)3-4-13-9-14(5-8-17(13)22)19-11-18(23)16-7-6-15(21)10-20(16)24-19/h3,5-10,19,21-22H,4,11H2,1-2H3/t19-/m0/s1	CC(=CCc1cc(ccc1O)[C@@H]1CC(=O)c2c(O1)cc(cc2)O)C	P18031,P11511	2
Isoxanthohumol	Flavanones	7-hydroxy-2-(4-hydroxyphenyl)-5-methoxy-8-(3-methylbut-2-enyl)-2,3-dihydrochromen-4-one	C21H22O5	YKGCBLWILMDSAV-UHFFFAOYSA-N	InChI=1S/C21H22O5/c1-12(2)4-9-15-16(23)10-19(25-3)20-17(24)11-18(26-21(15)20)13-5-7-14(22)8-6-13/h4-8,10,18,22-23H,9,11H2,1-3H3	COc1cc(O)c(c2c1C(=O)CC(O2)c1ccc(cc1)O)CC=C(C)C	P17252,O15530,Q04759,P56817	4
5,7-Dihydroxy-3-(3,4,5-Trihydroxy-6-Methyloxan-2-Yl)Oxy-2-(3,4,5-Trihydroxyphenyl)Chromen-4-One	Flavonols	5,7-dihydroxy-3-(3,4,5-trihydroxy-6-methyloxan-2-yl)oxy-2-(3,4,5-trihydroxyphenyl)chromen-4-one	C21H20O12	DCYOADKBABEMIQ-UHFFFAOYSA-N	InChI=1S/C21H20O12/c1-6-14(26)17(29)18(30)21(31-6)33-20-16(28)13-9(23)4-8(22)5-12(13)32-19(20)7-2-10(24)15(27)11(25)3-7/h2-6,14,17-18,21-27,29-30H,1H3	Oc1cc(O)c2c(c1)oc(c(c2=O)OC1OC(C)C(C(C1O)O)O)c1cc(O)c(c(c1)O)O	P06746,P53350,P39748,O75164,Q9Y468,Q13526,O94925,P10636,Q9UNA4,P10253	10
b"(2S)-6-(Gamma,Gamma-Dimethylallyl)-5-3-Dihydroxy-4-Methoxy-6,6dimethylpyran[2,37,8]Flavanone"	Flavanones	(2S)-5-hydroxy-2-(3-hydroxy-4-methoxyphenyl)-8,8-dimethyl-6-(3-methylbut-2-enyl)-2,3-dihydropyrano[2,3-h]chromen-4-one	C26H28O6	RGXSRPKLOMKRQU-NRFANRHFSA-N	InChI=1S/C26H28O6/c1-14(2)6-8-16-23(29)22-19(28)13-21(15-7-9-20(30-5)18(27)12-15)31-25(22)17-10-11-26(3,4)32-24(16)17/h6-7,9-12,21,27,29H,8,13H2,1-5H3/t21-/m0/s1	COc1ccc(cc1O)[C@@H]1CC(=O)c2c(O1)c1C=CC(Oc1c(c2O)CC=C(C)C)(C)C	P11926	1
Rhoifolin	Flavones	7-[(2S,3R,4S,5S,6R)-4,5-dihydroxy-6-(hydroxymethyl)-3-[(2S,3R,4R,5R,6S)-3,4,5-trihydroxy-6-methyloxan-2-yl]oxyoxan-2-yl]oxy-5-hydroxy-2-(4-hydroxyphenyl)chromen-4-one	C27H30O14	RPMNUQRUHXIGHK-PYXJVEIZSA-N	InChI=1S/C27H30O14/c1-10-20(32)22(34)24(36)26(37-10)41-25-23(35)21(33)18(9-28)40-27(25)38-13-6-14(30)19-15(31)8-16(39-17(19)7-13)11-2-4-12(29)5-3-11/h2-8,10,18,20-30,32-36H,9H2,1H3/t10-,18+,20-,21+,22+,23-,24+,25+,26-,27+/m0/s1	OC[C@H]1O[C@@H](Oc2cc(O)c3c(c2)oc(cc3=O)c2ccc(cc2)O)[C@@H]([C@H]([C@@H]1O)O)O[C@@H]1O[C@@H](C)[C@@H]([C@H]([C@H]1O)O)O	Q9NPD5,P35354,Q9Y6L6	3
2-(3,4-Dihydroxyphenyl)-5-Hydroxy-7-Methoxychromen-4-One	Flavones	2-(3,4-dihydroxyphenyl)-5-hydroxy-7-methoxychromen-4-one	C16H12O6	RRRSSAVLTCVNIQ-UHFFFAOYSA-N	InChI=1S/C16H12O6/c1-21-9-5-12(19)16-13(20)7-14(22-15(16)6-9)8-2-3-10(17)11(18)4-8/h2-7,17-19H,1H3	COc1cc(O)c2c(c1)oc(cc2=O)c1ccc(c(c1)O)O	P00747	1
b"(2S)-5,7,3-Trihydroxy-4-Methoxy-8-(3-Methylbut-2-Enyl)-Flavonone"	Flavanones	(2S)-5,7-dihydroxy-2-(3-hydroxy-4-methoxyphenyl)-8-(3-methylbut-2-enyl)-2,3-dihydrochromen-4-one	C21H22O6	MDRKJMLXLVCUIU-IBGZPJMESA-N	InChI=1S/C21H22O6/c1-11(2)4-6-13-14(22)9-16(24)20-17(25)10-19(27-21(13)20)12-5-7-18(26-3)15(23)8-12/h4-5,7-9,19,22-24H,6,10H2,1-3H3/t19-/m0/s1	COc1ccc(cc1O)[C@@H]1CC(=O)c2c(O1)c(CC=C(C)C)c(cc2O)O	Q9UNQ0	1
Glycycoumarin	Others	3-(2,4-dihydroxyphenyl)-7-hydroxy-5-methoxy-6-(3-methylbut-2-enyl)chromen-2-one	C21H20O6	NZYSZZDSYIBYLC-UHFFFAOYSA-N	InChI=1S/C21H20O6/c1-11(2)4-6-14-18(24)10-19-16(20(14)26-3)9-15(21(25)27-19)13-7-5-12(22)8-17(13)23/h4-5,7-10,22-24H,6H2,1-3H3	COc1c(CC=C(C)C)c(O)cc2c1cc(c(=O)o2)c1ccc(cc1O)O	Q16236,P18031	2
Dihydromorin	Flavanonol	(2R,3R)-2-(2,4-dihydroxyphenyl)-3,5,7-trihydroxy-2,3-dihydrochromen-4-one	C15H12O7	QIWOFDHUQPJCJF-LSDHHAIUSA-N	InChI=1S/C15H12O7/c16-6-1-2-8(9(18)3-6)15-14(21)13(20)12-10(19)4-7(17)5-11(12)22-15/h1-5,14-19,21H/t14-,15+/m0/s1	Oc1ccc(c(c1)O)[C@H]1Oc2cc(O)cc(c2C(=O)[C@@H]1O)O	P11511,P35354,P23219	3
Uncinanone A	Isoflavones	3-(2,4-dihydroxyphenyl)-5,7-dihydroxy-6-(3-methylbut-2-enyl)chromen-4-one	C20H18O6	MMPVAPMCVABQPS-UHFFFAOYSA-N	InChI=1S/C20H18O6/c1-10(2)3-5-13-16(23)8-17-18(19(13)24)20(25)14(9-26-17)12-6-4-11(21)7-15(12)22/h3-4,6-9,21-24H,5H2,1-2H3	CC(=CCc1c(O)cc2c(c1O)c(=O)c(co2)c1ccc(cc1O)O)C	Q16236	1
b"(2S)-5,7-Dihydroxy-2-(Hydroxymethyl)-8-Methoxy-2-Methyl-2,6-Bichroman-4-One"	Flavanones	(2S)-5,7-dihydroxy-2-[2-(hydroxymethyl)-8-methoxy-2-methylchromen-6-yl]-2,3-dihydrochromen-4-one	C21H20O7	DNWBCRWFRVKNFW-BJQOMGFOSA-N	InChI=1S/C21H20O7/c1-21(10-22)4-3-11-5-12(6-18(26-2)20(11)28-21)16-9-15(25)19-14(24)7-13(23)8-17(19)27-16/h3-8,16,22-24H,9-10H2,1-2H3/t16-,21?/m0/s1	COc1cc(cc2c1OC(C)(CO)C=C2)[C@@H]1CC(=O)c2c(O1)cc(cc2O)O	P18031	1
Isohamnetin 3-O-Galactoside	Flavonols	5,7-dihydroxy-2-(4-hydroxy-3-methoxyphenyl)-3-[(2S,3R,4S,5R,6R)-3,4,5-trihydroxy-6-(hydroxymethyl)oxan-2-yl]oxychromen-4-one	C22H22O12	CQLRUIIRRZYHHS-UVHBULKNSA-N	InChI=1S/C22H22O12/c1-31-12-4-8(2-3-10(12)25)20-21(17(28)15-11(26)5-9(24)6-13(15)32-20)34-22-19(30)18(29)16(27)14(7-23)33-22/h2-6,14,16,18-19,22-27,29-30H,7H2,1H3/t14-,16+,18+,19-,22+/m1/s1	OC[C@H]1O[C@@H](Oc2c(oc3c(c2=O)c(O)cc(c3)O)c2ccc(c(c2)OC)O)[C@@H]([C@H]([C@H]1O)O)O	P08908	1
6-(6-Hydroxy-1-Benzofuran-2-Yl)-2,2-Dimethylchromen-5-Ol	Others	6-(6-hydroxy-1-benzofuran-2-yl)-2,2-dimethylchromen-5-ol	C19H16O4	AOVQEAUIBICOLQ-UHFFFAOYSA-N	InChI=1S/C19H16O4/c1-19(2)8-7-14-15(23-19)6-5-13(18(14)21)17-9-11-3-4-12(20)10-16(11)22-17/h3-10,20-21H,1-2H3	Oc1ccc2c(c1)oc(c2)c1ccc2c(c1O)C=CC(O2)(C)C	P18031	1
Bonannione A	Flavanones	(2S)-6-[(2E)-3,7-dimethylocta-2,6-dienyl]-5,7-dihydroxy-2-(4-hydroxyphenyl)-2,3-dihydrochromen-4-one	C25H28O5	XYIQIBWIEGCVQY-RWHUQTJRSA-N	InChI=1S/C25H28O5/c1-15(2)5-4-6-16(3)7-12-19-20(27)13-23-24(25(19)29)21(28)14-22(30-23)17-8-10-18(26)11-9-17/h5,7-11,13,22,26-27,29H,4,6,12,14H2,1-3H3/b16-7+/t22-/m0/s1	C/C(=CCc1c(O)cc2c(c1O)C(=O)C[C@H](O2)c1ccc(cc1)O)/CCC=C(C)C	P22303	1
(S)-2-(3,5-Dihydroxyphenyl)-5,7-Dihydroxy-6,8-Bis(3-Methylbut-2-Enyl)Chroman-4-One	Flavanones	(2S)-2-(3,5-dihydroxyphenyl)-5,7-dihydroxy-6,8-bis(3-methylbut-2-enyl)-2,3-dihydrochromen-4-one	C25H28O6	OKBQXURKDRNMAB-NRFANRHFSA-N	InChI=1S/C25H28O6/c1-13(2)5-7-18-23(29)19(8-6-14(3)4)25-22(24(18)30)20(28)12-21(31-25)15-9-16(26)11-17(27)10-15/h5-6,9-11,21,26-27,29-30H,7-8,12H2,1-4H3/t21-/m0/s1	CC(=CCc1c2O[C@@H](CC(=O)c2c(c(c1O)CC=C(C)C)O)c1cc(O)cc(c1)O)C	Q9UNQ0	1
Taiwaniaflavone	Isoflavones	3-[5-(5,7-dihydroxy-4-oxochromen-2-yl)-2-hydroxyphenyl]-5,7-dihydroxy-2-(4-hydroxyphenyl)chromen-4-one	C30H18O10	IMKDLTDRZZSWPR-UHFFFAOYSA-N	InChI=1S/C30H18O10/c31-15-4-1-13(2-5-15)30-26(29(38)28-21(36)9-17(33)11-25(28)40-30)18-7-14(3-6-19(18)34)23-12-22(37)27-20(35)8-16(32)10-24(27)39-23/h1-12,31-36H	Oc1ccc(cc1)c1oc2cc(O)cc(c2c(=O)c1c1cc(ccc1O)c1cc(=O)c2c(o1)cc(cc2O)O)O	P18031	1
Bavachinin	Flavones	2-(4-hydroxyphenyl)-7-methoxy-6-(3-methylbut-2-enyl)chromen-4-one	C21H20O4	BVTZAHKRSBADDO-UHFFFAOYSA-N	InChI=1S/C21H20O4/c1-13(2)4-5-15-10-17-18(23)11-20(14-6-8-16(22)9-7-14)25-21(17)12-19(15)24-3/h4,6-12,22H,5H2,1-3H3	COc1cc2oc(cc(=O)c2cc1CC=C(C)C)c1ccc(cc1)O	P37231	1
Engeletin	Flavan-3-ols	(2S,3R,4R,5R,6S)-2-[[(2R,3R)-5,7-dihydroxy-2-(4-hydroxyphenyl)-3,4-dihydro-2H-chromen-3-yl]oxy]-6-methyloxane-3,4,5-triol	C21H24O9	SQJLTDFIOMWZDE-LPKHTLNGSA-N	InChI=1S/C21H24O9/c1-9-17(25)18(26)19(27)21(28-9)30-16-8-13-14(24)6-12(23)7-15(13)29-20(16)10-2-4-11(22)5-3-10/h2-7,9,16-27H,8H2,1H3/t9-,16+,17-,18+,19+,20+,21-/m0/s1	Oc1ccc(cc1)[C@H]1Oc2cc(O)cc(c2C[C@H]1O[C@@H]1O[C@@H](C)[C@@H]([C@H]([C@H]1O)O)O)O	P23219	1
Egonol	Others	3-[2-(1,3-benzodioxol-5-yl)-7-methoxy-1-benzofuran-5-yl]propan-1-ol	C19H18O5	VOLZBKQSLGCZGC-UHFFFAOYSA-N	InChI=1S/C19H18O5/c1-21-18-8-12(3-2-6-20)7-14-10-16(24-19(14)18)13-4-5-15-17(9-13)23-11-22-15/h4-5,7-10,20H,2-3,6,11H2,1H3	OCCCc1cc2cc(oc2c(c1)OC)c1ccc2c(c1)OCO2	P22303,P49327	2
Sophoricoside	Isoflavones	5,7-dihydroxy-3-[4-[(2S,3R,4S,5S,6R)-3,4,5-trihydroxy-6-(hydroxymethyl)oxan-2-yl]oxyphenyl]chromen-4-one	C21H20O10	ISQRJFLLIDGZEP-CMWLGVBASA-N	InChI=1S/C21H20O10/c22-7-15-18(26)19(27)20(28)21(31-15)30-11-3-1-9(2-4-11)12-8-29-14-6-10(23)5-13(24)16(14)17(12)25/h1-6,8,15,18-24,26-28H,7H2/t15-,18-,19+,20-,21-/m1/s1	OC[C@H]1O[C@@H](Oc2ccc(cc2)c2coc3c(c2=O)c(O)cc(c3)O)[C@@H]([C@H]([C@@H]1O)O)O	P00352,B2RXH2	2
Licuroside	Others	(E)-1-[4-[(2S,3R,4S,5S,6R)-3-[(2S,3R,4R)-3,4-dihydroxy-4-(hydroxymethyl)oxolan-2-yl]oxy-4,5-dihydroxy-6-(hydroxymethyl)oxan-2-yl]oxy-2-hydroxyphenyl]-3-(4-hydroxyphenyl)prop-2-en-1-one	C26H30O13	NIZFPXZQERMCLE-KVFWHIKKSA-N	InChI=1S/C26H30O13/c27-10-19-20(32)21(33)22(39-25-23(34)26(35,11-28)12-36-25)24(38-19)37-15-6-7-16(18(31)9-15)17(30)8-3-13-1-4-14(29)5-2-13/h1-9,19-25,27-29,31-35H,10-12H2/b8-3+/t19-,20-,21+,22-,23+,24-,25+,26-/m1/s1	OC[C@H]1O[C@@H](Oc2ccc(c(c2)O)C(=O)/C=C/c2ccc(cc2)O)[C@@H]([C@H]([C@@H]1O)O)O[C@@H]1OC[C@]([C@H]1O)(O)CO	P18031,P15121	2
O-Demethylbuchenavianine	Flavones	5,7-dihydroxy-8-(1-methylpiperidin-2-yl)-2-phenylchromen-4-one	C21H21NO4	BBZGOLNDVQZCIH-UHFFFAOYSA-N	InChI=1S/C21H21NO4/c1-22-10-6-5-9-14(22)19-15(23)11-16(24)20-17(25)12-18(26-21(19)20)13-7-3-2-4-8-13/h2-4,7-8,11-12,14,23-24H,5-6,9-10H2,1H3	CN1CCCCC1c1c(O)cc(c2c1oc(cc2=O)c1ccccc1)O	Q15078	1
3-(3,4-Dimethoxyphenyl)-7-Hydroxy-4-Methylchromen-2-One	Others	3-(3,4-dimethoxyphenyl)-7-hydroxy-4-methylchromen-2-one	C18H16O5	AQGVQGLSKSEDGI-UHFFFAOYSA-N	InChI=1S/C18H16O5/c1-10-13-6-5-12(19)9-15(13)23-18(20)17(10)11-4-7-14(21-2)16(8-11)22-3/h4-9,19H,1-3H3	COc1cc(ccc1OC)c1c(=O)oc2c(c1C)ccc(c2)O	P83916,P04062,O75496,P11473,P63092,Q9UNA4,Q9NR56,Q99700	8
8-Prenylnaringenin	Flavanones	(2S)-5,7-dihydroxy-2-(4-hydroxyphenyl)-8-(3-methylbut-2-enyl)-2,3-dihydrochromen-4-one	C20H20O5	LPEPZZAVFJPLNZ-SFHVURJKSA-N	InChI=1S/C20H20O5/c1-11(2)3-8-14-15(22)9-16(23)19-17(24)10-18(25-20(14)19)12-4-6-13(21)7-5-12/h3-7,9,18,21-23H,8,10H2,1-2H3/t18-/m0/s1	CC(=CCc1c(O)cc(c2c1O[C@@H](CC2=O)c1ccc(cc1)O)O)C	O14684,Q9UNQ0,P09917	3
5-Hydroxy-2-(3-Hydroxy-4-Methoxyphenyl)-7-[3,4,5-Trihydroxy-6-[(3,4,5-Trihydroxy-6-Methyloxan-2-Yl)Oxymethyl]Oxan-2-Yl]Oxy-2,3-Dihydrochromen-4-One	Flavanones	5-hydroxy-2-(3-hydroxy-4-methoxyphenyl)-7-[3,4,5-trihydroxy-6-[(3,4,5-trihydroxy-6-methyloxan-2-yl)oxymethyl]oxan-2-yl]oxy-2,3-dihydrochromen-4-one	C28H34O15	QUQPHWDTPGMPEX-UHFFFAOYSA-N	InChI=1S/C28H34O15/c1-10-21(32)23(34)25(36)27(40-10)39-9-19-22(33)24(35)26(37)28(43-19)41-12-6-14(30)20-15(31)8-17(42-18(20)7-12)11-3-4-16(38-2)13(29)5-11/h3-7,10,17,19,21-30,32-37H,8-9H2,1-2H3	COc1ccc(cc1O)C1CC(=O)c2c(O1)cc(cc2O)OC1OC(COC2OC(C)C(C(C2O)O)O)C(C(C1O)O)O	Q9NUW8,P27695,Q9UBT6	3
Prunetin	Isoflavones	5-hydroxy-3-(4-hydroxyphenyl)-7-methoxychromen-4-one	C16H12O5	KQMVAGISDHMXJJ-UHFFFAOYSA-N	InChI=1S/C16H12O5/c1-20-11-6-13(18)15-14(7-11)21-8-12(16(15)19)9-2-4-10(17)5-3-9/h2-8,17-18H,1H3	COc1cc(O)c2c(c1)occ(c2=O)c1ccc(cc1)O	P15121,P05091,P00533,P11388	4
(2R,3R)-5,7-Diacetoxy-2-(3,4,5-Triacetoxyphenyl)-3,4-Dihydro-2H-Chromen-3-Yl 3,4,5-Triacetoxybenzoate	Flavan-3-ols	[(2R,3R)-5,7-diacetyloxy-2-(3,4,5-triacetyloxyphenyl)-3,4-dihydro-2H-chromen-3-yl] 3,4,5-triacetyloxybenzoate	C38H34O19	SVHJCTSSYQPWEV-VSJLXWSYSA-N	InChI=1S/C38H34O19/c1-16(39)48-26-13-28(49-17(2)40)27-15-34(57-38(47)25-11-32(52-20(5)43)37(55-23(8)46)33(12-25)53-21(6)44)35(56-29(27)14-26)24-9-30(50-18(3)41)36(54-22(7)45)31(10-24)51-19(4)42/h9-14,34-35H,15H2,1-8H3/t34-,35-/m1/s1	CC(=O)Oc1cc(OC(=O)C)c2c(c1)O[C@@H]([C@@H](C2)OC(=O)c1cc(OC(=O)C)c(c(c1)OC(=O)C)OC(=O)C)c1cc(OC(=O)C)c(c(c1)OC(=O)C)OC(=O)C	P08183	1
b"6-Geranyl-4,5,7-Trihydroxy-3,5-Dimethoxyflavanone"	Flavanones	6-[(2E)-3,7-dimethylocta-2,6-dienyl]-5,7-dihydroxy-2-(4-hydroxy-3,5-dimethoxyphenyl)-2,3-dihydrochromen-4-one	C27H32O7	UPBJEHBYZUPVDF-CXUHLZMHSA-N	InChI=1S/C27H32O7/c1-15(2)7-6-8-16(3)9-10-18-19(28)13-22-25(26(18)30)20(29)14-21(34-22)17-11-23(32-4)27(31)24(12-17)33-5/h7,9,11-13,21,28,30-31H,6,8,10,14H2,1-5H3/b16-9+	COc1cc(cc(c1O)OC)C1CC(=O)c2c(O1)cc(c(c2O)C/C=C(/CCC=C(C)C)C)O	P22303	1
Tricetin	Flavones	5,7-dihydroxy-2-(3,4,5-trihydroxyphenyl)chromen-4-one	C15H10O7	ARSRJFRKVXALTF-UHFFFAOYSA-N	InChI=1S/C15H10O7/c16-7-3-8(17)14-9(18)5-12(22-13(14)4-7)6-1-10(19)15(21)11(20)2-6/h1-5,16-17,19-21H	Oc1cc(O)c2c(c1)oc(cc2=O)c1cc(O)c(c(c1)O)O	P00352,P27695,Q13332,O94782,Q03164,Q9UBT6,P10636,P15428,Q9NPD5,P16050,P51570,Q9Y6L6,Q99714,P46063,B2RXH2,Q9Y3R4	16
Flavone	Flavones	2-phenylchromen-4-one	C15H10O2	VHBFFQKBGNRLFZ-UHFFFAOYSA-N	InChI=1S/C15H10O2/c16-13-10-15(11-6-2-1-3-7-11)17-14-9-5-4-8-12(13)14/h1-10H	O=c1cc(oc2c1cccc2)c1ccccc1	P19838,P09874,Q03181,Q16637,Q08493,P51151,P78527,P0DMS8,P83916,P43220,P04150,P15144,P19793,Q9UNQ0,P10275,P21397,P35869,O15118,Q16790,P00915,P14061,P11511,P28845,P03372,P37059,Q16445,P10145,O75496,P51449,P08183,P00533,Q96QE3,O43570,Q9H2K2,P15428,P08684,P00918,Q16236,O95271,P04792,P62158	41
(2-Methyl-4-Oxo-3-Phenylchromen-7-Yl) Acetate	Isoflavones	(2-methyl-4-oxo-3-phenylchromen-7-yl) acetate	C18H14O4	DPIAJERHFDBLPT-UHFFFAOYSA-N	InChI=1S/C18H14O4/c1-11-17(13-6-4-3-5-7-13)18(20)15-9-8-14(22-12(2)19)10-16(15)21-11/h3-10H,1-2H3	CC(=O)Oc1ccc2c(c1)oc(c(c2=O)c1ccccc1)C	P83916,P10636,P63092,P17405,B2RXH2	5
Eupatilin	Flavones	2-(3,4-dimethoxyphenyl)-5,7-dihydroxy-6-methoxychromen-4-one	C18H16O7	DRRWBCNQOKKKOL-UHFFFAOYSA-N	InChI=1S/C18H16O7/c1-22-12-5-4-9(6-14(12)23-2)13-7-10(19)16-15(25-13)8-11(20)18(24-3)17(16)21/h4-8,20-21H,1-3H3	COc1cc(ccc1OC)c1cc(=O)c2c(o1)cc(c(c2O)OC)O	P41145,P34972,Q9BUF5,P41143,P35372,P21554	6
2-(3,4-Dihydroxyphenyl)-5,7-Dihydroxy-2,3-Dihydrochromen-4-One	Flavanones	2-(3,4-dihydroxyphenyl)-5,7-dihydroxy-2,3-dihydrochromen-4-one	C15H12O6	SBHXYTNGIZCORC-UHFFFAOYSA-N	InChI=1S/C15H12O6/c16-8-4-11(19)15-12(20)6-13(21-14(15)5-8)7-1-2-9(17)10(18)3-7/h1-5,13,16-19H,6H2	Oc1cc2OC(CC(=O)c2c(c1)O)c1ccc(c(c1)O)O	P27695,P00747,P09923,O75164,P16050,P00352,P05164,P14618,B2RXH2,O75496,Q99714,P46063,P10696,P28482,Q9Y253,Q14191,P15428,P05186,P09917,Q9UNA4	20
Sophoraflavanone	Flavanones	5,7-dihydroxy-2-(4-hydroxyphenyl)-8-(3-methylbut-2-enyl)-2,3-dihydrochromen-4-one	C20H20O5	LPEPZZAVFJPLNZ-UHFFFAOYSA-N	InChI=1S/C20H20O5/c1-11(2)3-8-14-15(22)9-16(23)19-17(24)10-18(25-20(14)19)12-4-6-13(21)7-5-12/h3-7,9,18,21-23H,8,10H2,1-2H3	CC(=CCc1c(O)cc(c2c1OC(CC2=O)c1ccc(cc1)O)O)C	Q8WZA2,P43220,P03372,O75496,Q13526,Q92731,Q13148,P03372,O94925,O76074,P37840	11
5-Hydroxy-2-(3-Hydroxy-4-Methoxyphenyl)-3,6,7,8-Tetramethoxychromen-4-One	Flavonols	5-hydroxy-2-(3-hydroxy-4-methoxyphenyl)-3,6,7,8-tetramethoxychromen-4-one	C20H20O9	GVLMRDDSMVCWKB-UHFFFAOYSA-N	InChI=1S/C20H20O9/c1-24-11-7-6-9(8-10(11)21)15-17(25-2)13(22)12-14(23)18(26-3)20(28-5)19(27-4)16(12)29-15/h6-8,21,23H,1-5H3	COc1ccc(cc1O)c1oc2c(OC)c(OC)c(c(c2c(=O)c1OC)O)OC	Q9BUF5	1
Bavachin	Flavanones	(2S)-7-hydroxy-2-(4-hydroxyphenyl)-6-(3-methylbut-2-enyl)-2,3-dihydrochromen-4-one	C20H20O4	OAUREGNZECGNQS-IBGZPJMESA-N	InChI=1S/C20H20O4/c1-12(2)3-4-14-9-16-18(23)11-19(24-20(16)10-17(14)22)13-5-7-15(21)8-6-13/h3,5-10,19,21-22H,4,11H2,1-2H3/t19-/m0/s1	CC(=CCc1cc2C(=O)C[C@H](Oc2cc1O)c1ccc(cc1)O)C	P11511	1
Catechin Gallate	Flavan-3-ols	[(2R,3S)-2-(3,4-dihydroxyphenyl)-5,7-dihydroxy-3,4-dihydro-2H-chromen-3-yl] 3,4,5-trihydroxybenzoate	C22H18O10	LSHVYAFMTMFKBA-PZJWPPBQSA-N	InChI=1S/C22H18O10/c23-11-6-14(25)12-8-19(32-22(30)10-4-16(27)20(29)17(28)5-10)21(31-18(12)7-11)9-1-2-13(24)15(26)3-9/h1-7,19,21,23-29H,8H2/t19-,21+/m0/s1	Oc1cc(O)c2c(c1)O[C@@H]([C@H](C2)OC(=O)c1cc(O)c(c(c1)O)O)c1ccc(c(c1)O)O	P10415	1
Pectolinarigenin	Flavones	5,7-dihydroxy-6-methoxy-2-(4-methoxyphenyl)chromen-4-one	C17H14O6	GPQLHGCIAUEJQK-UHFFFAOYSA-N	InChI=1S/C17H14O6/c1-21-10-5-3-9(4-6-10)13-7-11(18)15-14(23-13)8-12(19)17(22-2)16(15)20/h3-8,19-20H,1-2H3	COc1ccc(cc1)c1cc(=O)c2c(o1)cc(c(c2O)OC)O	P06746,Q9BUF5,P41143,P51151,P34972,O15118,P10721,Q03431,P35372,Q04206,O75496,Q13526,P63092,P21554,Q99700,Q96QE3,O94925,P10636	18
b"Abyssinone-Iv-4-O-Methyl Ether"	Flavanones	(2S)-7-hydroxy-2-[4-methoxy-3,5-bis(3-methylbut-2-enyl)phenyl]-2,3-dihydrochromen-4-one	C26H30O4	UOOVGAFDYLDFRW-DEOSSOPVSA-N	InChI=1S/C26H30O4/c1-16(2)6-8-18-12-20(13-19(26(18)29-5)9-7-17(3)4)24-15-23(28)22-11-10-21(27)14-25(22)30-24/h6-7,10-14,24,27H,8-9,15H2,1-5H3/t24-/m0/s1	COc1c(CC=C(C)C)cc(cc1CC=C(C)C)[C@@H]1CC(=O)c2c(O1)cc(cc2)O	P18031	1
6,8-Diprenylorobo	Isoflavones	3-(3,4-dihydroxyphenyl)-5,7-dihydroxy-6,8-bis(3-methylbut-2-enyl)chromen-4-one	C25H26O6	OAUIRSVJXOFAOO-UHFFFAOYSA-N	InChI=1S/C25H26O6/c1-13(2)5-8-16-22(28)17(9-6-14(3)4)25-21(23(16)29)24(30)18(12-31-25)15-7-10-19(26)20(27)11-15/h5-7,10-12,26-29H,8-9H2,1-4H3	CC(=CCc1c(O)c(CC=C(C)C)c2c(c1O)c(=O)c(co2)c1ccc(c(c1)O)O)C	P18031	1
b"5,7,3,4-Tetrahydroxy-3-Methoxy-6-Geranylflavone"	Flavonols	2-(3,4-dihydroxyphenyl)-6-[(2E)-3,7-dimethylocta-2,6-dienyl]-5,7-dihydroxy-3-methoxychromen-4-one	C26H28O7	SFMXXEOUUFGNQC-OVCLIPMQSA-N	InChI=1S/C26H28O7/c1-14(2)6-5-7-15(3)8-10-17-19(28)13-21-22(23(17)30)24(31)26(32-4)25(33-21)16-9-11-18(27)20(29)12-16/h6,8-9,11-13,27-30H,5,7,10H2,1-4H3/b15-8+	COc1c(oc2c(c1=O)c(O)c(c(c2)O)C/C=C(/CCC=C(C)C)C)c1ccc(c(c1)O)O	P11511	1
Glabranin	Flavanones	(2S)-5,7-dihydroxy-8-(3-methylbut-2-enyl)-2-phenyl-2,3-dihydrochromen-4-one	C20H20O4	DAWSYIQAGQMLFS-SFHVURJKSA-N	InChI=1S/C20H20O4/c1-12(2)8-9-14-15(21)10-16(22)19-17(23)11-18(24-20(14)19)13-6-4-3-5-7-13/h3-8,10,18,21-22H,9,11H2,1-2H3/t18-/m0/s1	CC(=CCc1c(O)cc(c2c1O[C@@H](CC2=O)c1ccccc1)O)C	P11712,P08684,P33261	3
3-[2-(1,3-Benzodioxol-5-Yl)-7-Methoxy-1-Benzofuran-5-Yl]Propyl (2S)-2-Methylbutanoate	Others	3-[2-(1,3-benzodioxol-5-yl)-7-methoxy-1-benzofuran-5-yl]propyl (2S)-2-methylbutanoate	C24H26O6	MGCSMWCSVJYFBV-HNNXBMFYSA-N	InChI=1S/C24H26O6/c1-4-15(2)24(25)27-9-5-6-16-10-18-13-20(30-23(18)22(11-16)26-3)17-7-8-19-21(12-17)29-14-28-19/h7-8,10-13,15H,4-6,9,14H2,1-3H3/t15-/m0/s1	CC[C@@H](C(=O)OCCCc1cc(OC)c2c(c1)cc(o2)c1ccc2c(c1)OCO2)C	P22303	1
Alvocidi	Flavones	2-(2-chlorophenyl)-5,7-dihydroxy-8-[(3S,4R)-3-hydroxy-1-methylpiperidin-4-yl]chromen-4-one	C21H20ClNO5	BIIVYFLTOXDAOV-YVEFUNNKSA-N	InChI=1S/C21H20ClNO5/c1-23-7-6-12(17(27)10-23)19-14(24)8-15(25)20-16(26)9-18(28-21(19)20)11-4-2-3-5-13(11)22/h2-5,8-9,12,17,24-25,27H,6-7,10H2,1H3/t12-,17+/m0/s1	CN1CC[C@@H]([C@@H](C1)O)c1c(O)cc(c2c1oc(cc2=O)c1ccccc1Cl)O	P49841,P50613,P24941,O00444,P50750,Q00526,Q8WTQ7,Q59H18,P78396,Q00535,P49841,Q9HBH9,Q00536,Q9H422,P29597,P42685,P37173,Q9UQM7,Q9H2X6,P06239,Q9Y463,Q05655,Q13131,Q13554,O94768,P24723,Q7L7X3,P17252,O15075,P10721,P04626,Q86V86,Q9Y2U5,P11217,P24385,O95067,Q5VT25,Q8N5S9,P11802,Q96RR4,P50613,Q9UK32,Q9UHD2,Q04759,Q08881,Q9UEE5,Q9P1W9,Q8IVH8,Q9UPZ9,Q2M2I8,P20794,P05771,Q13164,P36888,Q15418,Q13188,Q02779,…	92
Isoginkgetin	Flavones	8-[5-(5,7-dihydroxy-4-oxochromen-2-yl)-2-methoxyphenyl]-5,7-dihydroxy-2-(4-methoxyphenyl)chromen-4-one	C32H22O10	HUOOMAOYXQFIDQ-UHFFFAOYSA-N	InChI=1S/C32H22O10/c1-39-18-6-3-15(4-7-18)26-14-24(38)31-22(36)12-21(35)29(32(31)42-26)19-9-16(5-8-25(19)40-2)27-13-23(37)30-20(34)10-17(33)11-28(30)41-27/h3-14,33-36H,1-2H3	COc1ccc(cc1)c1cc(=O)c2c(o1)c(c(cc2O)O)c1cc(ccc1OC)c1cc(=O)c2c(o1)cc(cc2O)O	P02545,O94782,Q03164,P10636,P08684,Q9NPD5,P04637,Q9Y6L6,Q99714,P56817	10
Isoliquiritin	Others	(E)-1-(2,4-dihydroxyphenyl)-3-[4-[(2S,3R,4S,5S,6R)-3,4,5-trihydroxy-6-(hydroxymethyl)oxan-2-yl]oxyphenyl]prop-2-en-1-one	C21H22O9	YNWXJFQOCHMPCK-LXGDFETPSA-N	InChI=1S/C21H22O9/c22-10-17-18(26)19(27)20(28)21(30-17)29-13-5-1-11(2-6-13)3-8-15(24)14-7-4-12(23)9-16(14)25/h1-9,17-23,25-28H,10H2/b8-3+/t17-,18-,19+,20-,21-/m1/s1	OC[C@H]1O[C@@H](Oc2ccc(cc2)/C=C/C(=O)c2ccc(cc2O)O)[C@@H]([C@H]([C@@H]1O)O)O	P27487,P15121,P18031	3
n.a.	Flavanones	</td></tr>\r\n\t\t\t\t<tr><td align=right><b>Synonyms: &nbsp</b>	C30H36O5	NUOVQYNGOFQMCJ-QBHOUYDASA-N	InChI=1S/C30H36O5/c1-17(2)7-9-19-13-20(14-21-15-27(33)30(5,6)35-28(19)21)26-16-25(32)23-11-12-24(31)22(29(23)34-26)10-8-18(3)4/h7-8,11-14,26-27,31,33H,9-10,15-16H2,1-6H3/t26-,27?/m0/s1	CC(=CCc1c(O)ccc2c1O[C@@H](CC2=O)c1cc(CC=C(C)C)c2c(c1)CC(C(O2)(C)C)O)C	P19793	1
Epicatechin Gallate	Flavan-3-ols	[(2R,3R)-2-(3,4-dihydroxyphenyl)-5,7-dihydroxy-3,4-dihydro-2H-chromen-3-yl] 3,4,5-trihydroxybenzoate	C22H18O10	LSHVYAFMTMFKBA-TZIWHRDSSA-N	InChI=1S/C22H18O10/c23-11-6-14(25)12-8-19(32-22(30)10-4-16(27)20(29)17(28)5-10)21(31-18(12)7-11)9-1-2-13(24)15(26)3-9/h1-7,19,21,23-29H,8H2/t19-,21-/m1/s1	Oc1cc(O)c2c(c1)O[C@@H]([C@@H](C2)OC(=O)c1cc(O)c(c(c1)O)O)c1ccc(c(c1)O)O	P10415,Q9NPD5,Q9Y6L6,P02768,Q16539,P53355,P52209,P00374	8
Isoglycyrol	Others	</td></tr>\r\n\t\t\t\t<tr><td align=right><b>Synonyms: &nbsp</b>	C21H18O6	CFWLRXJPRRCJTI-UHFFFAOYSA-N	InChI=1S/C21H18O6/c1-21(2)7-6-12-14(27-21)9-15-17(18(12)24-3)19-16(20(23)26-15)11-5-4-10(22)8-13(11)25-19/h4-5,8-9,22H,6-7H2,1-3H3	COc1c2CCC(Oc2cc2c1c1oc3c(c1c(=O)o2)ccc(c3)O)(C)C	P83916,O75496,Q16236,Q03431,P17405,P38398	6
n.a.	Flavones	</td></tr>\r\n\t\t\t\t<tr><td align=right><b>Synonyms: &nbsp</b>	C22H22O11	VSFKAJPKOFGJTH-MIUGBVLSSA-N	InChI=1S/C22H22O11/c1-30-13-3-2-9(14-7-12(26)18-11(25)5-10(24)6-16(18)31-14)4-15(13)32-22-21(29)20(28)19(27)17(8-23)33-22/h2-7,17,19-25,27-29H,8H2,1H3/t17-,19-,20+,21-,22-/m1/s1	OC[C@H]1O[C@@H](Oc2cc(ccc2OC)c2cc(=O)c3c(o2)cc(cc3O)O)[C@@H]([C@H]([C@@H]1O)O)O	P00747	1
Peonidin	Others	2-(4-hydroxy-3-methoxyphenyl)chromenylium-3,5,7-triol	C16H12O6	XFDQJKDGGOEYPI-UHFFFAOYSA-O	InChI=1S/C16H12O6/c1-21-15-4-8(2-3-11(15)18)16-13(20)7-10-12(19)5-9(17)6-14(10)22-16/h2-7H,1H3,(H3-,17,18,19,20)/p+1	COc1cc(ccc1O)c1[o+]c2cc(O)cc(c2cc1O)O	P28907	1
n.a.	Flavones	[(2S,3R,4R,5S,6R)-6-[4-(5,7-dihydroxy-4-oxochromen-2-yl)phenoxy]-3,4,5-trihydroxyoxan-2-yl]methyl (E)-3-(4-hydroxyphenyl)prop-2-enoate	C30H26O12	HIVMDOSHUCWOJU-CMAQPADGSA-N	InChI=1S/C30H26O12/c31-17-6-1-15(2-7-17)3-10-25(35)39-14-24-27(36)28(37)29(38)30(42-24)40-19-8-4-16(5-9-19)22-13-21(34)26-20(33)11-18(32)12-23(26)41-22/h1-13,24,27-33,36-38H,14H2/b10-3+/t24-,27-,28+,29-,30-/m0/s1	O=C(/C=C/c1ccc(cc1)O)OC[C@@H]1O[C@H](Oc2ccc(cc2)c2cc(=O)c3c(o2)cc(cc3O)O)[C@H]([C@@H]([C@H]1O)O)O	P47989	1
Flavonol	Flavonols	3-hydroxy-2-phenylchromen-4-one	C15H10O3	HVQAJTFOCKOKIN-UHFFFAOYSA-N	InChI=1S/C15H10O3/c16-13-11-8-4-5-9-12(11)18-15(14(13)17)10-6-2-1-3-7-10/h1-9,17H	O=c1c(O)c(oc2c1cccc2)c1ccccc1	P27695,P35503,Q9HAW9,Q9NPD5,Q9Y6L6,Q9HAW7,P04637,P10275,P16050,P22309,P54855,Q16790,P49327,P00915,P02545,Q9Y4X1,Q9HAW8,O75496,O15296,P28482,Q9Y253,O43570,O60656,Q03164,P00918,Q9UNA4,P62158	27
Daidzin	Isoflavones	3-(4-hydroxyphenyl)-7-[(2S,3R,4S,5S,6R)-3,4,5-trihydroxy-6-(hydroxymethyl)oxan-2-yl]oxychromen-4-one	C21H20O9	KYQZWONCHDNPDP-QNDFHXLGSA-N	InChI=1S/C21H20O9/c22-8-16-18(25)19(26)20(27)21(30-16)29-12-5-6-13-15(7-12)28-9-14(17(13)24)10-1-3-11(23)4-2-10/h1-7,9,16,18-23,25-27H,8H2/t16-,18-,19+,20-,21-/m1/s1	OC[C@H]1O[C@@H](Oc2ccc3c(c2)occ(c3=O)c2ccc(cc2)O)[C@@H]([C@H]([C@@H]1O)O)O	P83916,O15118,Q16637,P27338,P04637,P51151,P05091,P60568,Q96QE3,P38398	10
Boeravinone E	Isoflavones	3,6,9,11-tetrahydroxy-10-methyl-6H-chromeno[3,4-b]chromen-12-one	C17H12O7	NCWLTPKGFNPAMP-UHFFFAOYSA-N	InChI=1S/C17H12O7/c1-6-9(19)5-11-13(14(6)20)15(21)12-8-3-2-7(18)4-10(8)24-17(22)16(12)23-11/h2-5,17-20,22H,1H3	Oc1ccc2c(c1)OC(c1c2c(=O)c2c(o1)cc(c(c2O)C)O)O	Q9UNQ0	1
Oroxylin A	Flavones	5,7-dihydroxy-6-methoxy-2-phenylchromen-4-one	C16H12O5	LKOJGSWUMISDOF-UHFFFAOYSA-N	InChI=1S/C16H12O5/c1-20-16-11(18)8-13-14(15(16)19)10(17)7-12(21-13)9-5-3-2-4-6-9/h2-8,18-19H,1H3	COc1c(O)cc2c(c1O)c(=O)cc(o2)c1ccccc1	P35030,P05412,P16220,P36888	4
Kaempferol 3-O-D-Galactoside	Flavonols	5,7-dihydroxy-2-(4-hydroxyphenyl)-3-[(3R,4S,5R,6R)-3,4,5-trihydroxy-6-(hydroxymethyl)oxan-2-yl]oxychromen-4-one	C21H20O11	JPUKWEQWGBDDQB-HBDJNLTOSA-N	InChI=1S/C21H20O11/c22-7-13-15(26)17(28)18(29)21(31-13)32-20-16(27)14-11(25)5-10(24)6-12(14)30-19(20)8-1-3-9(23)4-2-8/h1-6,13,15,17-18,21-26,28-29H,7H2/t13-,15+,17+,18-,21?/m1/s1	OC[C@H]1OC(Oc2c(oc3c(c2=O)c(O)cc(c3)O)c2ccc(cc2)O)[C@@H]([C@H]([C@H]1O)O)O	P22303	1
Liquirtigenin	Flavanones	(2S)-7-hydroxy-2-(4-hydroxyphenyl)-2,3-dihydrochromen-4-one	C15H12O4	FURUXTVZLHCCNA-AWEZNQCLSA-N	InChI=1S/C15H12O4/c16-10-3-1-9(2-4-10)14-8-13(18)12-6-5-11(17)7-15(12)19-14/h1-7,14,16-17H,8H2/t14-/m0/s1	Oc1ccc(cc1)[C@@H]1CC(=O)c2c(O1)cc(cc2)O	P14780,Q04206,P11511,P18031,P05412	5
b"3,4,5,7-Tetrahydroxy-8-(3,3-Dimethylallyl)-Flavone"	Flavones	2-(3,4-dihydroxyphenyl)-5,7-dihydroxy-8-(3-methylbut-2-enyl)chromen-4-one	C20H18O6	WLZYCSNLBZYEHT-UHFFFAOYSA-N	InChI=1S/C20H18O6/c1-10(2)3-5-12-14(22)8-16(24)19-17(25)9-18(26-20(12)19)11-4-6-13(21)15(23)7-11/h3-4,6-9,21-24H,5H2,1-2H3	CC(=CCc1c(O)cc(c2c1oc(cc2=O)c1ccc(c(c1)O)O)O)C	P31749	1
Albanol A	Others	</td></tr>\r\n\t\t\t\t<tr><td align=right><b>Synonyms: &nbsp</b>	C34H26O8	MJJWBJFYYRAYKU-WLKQUGLZSA-N	InChI=1S/C34H26O8/c1-16-8-23-22-6-4-21(37)15-30(22)41-34(25-7-5-19(35)13-26(25)38)33(23)24(9-16)32-27(39)10-18(12-31(32)42-34)28-11-17-2-3-20(36)14-29(17)40-28/h2-7,9-15,23-24,33,35-39H,8H2,1H3/t23-,24-,33?,34+/m1/s1	CC1=C[C@@H]2c3c(O)cc(cc3O[C@]3(C2[C@H](C1)c1ccc(cc1O3)O)c1ccc(cc1O)O)c1oc2c(c1)ccc(c2)O	P11511	1
5-Hydroxy-2-(4-Hydroxyphenyl)-7-[(2S,3R,4S,5R,6R)-3,4,5-Trihydroxy-6-(Hydroxymethyl)Oxan-2-Yl]Oxychromen-4-One	Flavones	5-hydroxy-2-(4-hydroxyphenyl)-7-[(2S,3R,4S,5R,6R)-3,4,5-trihydroxy-6-(hydroxymethyl)oxan-2-yl]oxychromen-4-one	C21H20O10	KMOUJOKENFFTPU-OBJCFNGXSA-N	InChI=1S/C21H20O10/c22-8-16-18(26)19(27)20(28)21(31-16)29-11-5-12(24)17-13(25)7-14(30-15(17)6-11)9-1-3-10(23)4-2-9/h1-7,16,18-24,26-28H,8H2/t16-,18+,19+,20-,21-/m1/s1	OC[C@H]1O[C@@H](Oc2cc(O)c3c(c2)oc(cc3=O)c2ccc(cc2)O)[C@@H]([C@H]([C@H]1O)O)O	P83916	1
Kaempferol-3-O-(2-O-Acetyl-Alpha-L-Rhamnopyranoside)	Flavonols	[(2S,3R,4R,5R,6S)-2-[5,7-dihydroxy-2-(4-hydroxyphenyl)-4-oxochromen-3-yl]oxy-4,5-dihydroxy-6-methyloxan-3-yl] acetate	C23H22O11	QGPZJURATJCKHO-KNRSITRYSA-N	InChI=1S/C23H22O11/c1-9-17(28)19(30)22(32-10(2)24)23(31-9)34-21-18(29)16-14(27)7-13(26)8-15(16)33-20(21)11-3-5-12(25)6-4-11/h3-9,17,19,22-23,25-28,30H,1-2H3/t9-,17-,19+,22+,23-/m0/s1	CC(=O)O[C@H]1[C@@H](O[C@H]([C@@H]([C@H]1O)O)C)Oc1c(oc2c(c1=O)c(O)cc(c2)O)c1ccc(cc1)O	P10635,P08684	2
Erythraddison Iii	Others	(3S)-5,7-dihydroxy-3-[4-methoxy-3-(3-methylbut-2-enyl)phenyl]-2,3-dihydrochromen-4-one	C21H22O5	MGSNGDMLFQANLV-MRXNPFEDSA-N	InChI=1S/C21H22O5/c1-12(2)4-5-14-8-13(6-7-18(14)25-3)16-11-26-19-10-15(22)9-17(23)20(19)21(16)24/h4,6-10,16,22-23H,5,11H2,1-3H3/t16-/m1/s1	COc1ccc(cc1CC=C(C)C)[C@H]1COc2c(C1=O)c(O)cc(c2)O	P18031	1
Ikonnikoside I	Flavones	(2S,3S,4S,5R,6S)-6-[5,6-dihydroxy-2-(2-hydroxyphenyl)-4-oxochromen-7-yl]oxy-3,4,5-trihydroxyoxane-2-carboxylic acid	C21H18O12	ARCCSELFQKSKDR-ZFORQUDYSA-N	InChI=1S/C21H18O12/c22-8-4-2-1-3-7(8)10-5-9(23)13-11(31-10)6-12(14(24)15(13)25)32-21-18(28)16(26)17(27)19(33-21)20(29)30/h1-6,16-19,21-22,24-28H,(H,29,30)/t16-,17-,18+,19-,21+/m0/s1	OC(=O)[C@H]1O[C@@H](Oc2cc3oc(cc(=O)c3c(c2O)O)c2ccccc2O)[C@@H]([C@H]([C@@H]1O)O)O	P34969	1
Ginkgetin	Flavones	5,7-dihydroxy-8-[5-(5-hydroxy-7-methoxy-4-oxochromen-2-yl)-2-methoxyphenyl]-2-(4-hydroxyphenyl)chromen-4-one	C32H22O10	AIFCFBUSLAEIBR-UHFFFAOYSA-N	InChI=1S/C32H22O10/c1-39-18-10-20(34)30-23(37)13-27(41-28(30)11-18)16-5-8-25(40-2)19(9-16)29-21(35)12-22(36)31-24(38)14-26(42-32(29)31)15-3-6-17(33)7-4-15/h3-14,33-36H,1-2H3	COc1ccc(cc1c1c(O)cc(c2c1oc(cc2=O)c1ccc(cc1)O)O)c1cc(=O)c2c(o1)cc(cc2O)OC	P56817	1
3-[2-(1,3-Benzodioxol-5-Yl)-1-Benzofuran-5-Yl]Propyl (2S)-2-Methylbutanoate	Others	3-[2-(1,3-benzodioxol-5-yl)-1-benzofuran-5-yl]propyl (2S)-2-methylbutanoate	C23H24O5	MBOVWBBJDJPNSN-HNNXBMFYSA-N	InChI=1S/C23H24O5/c1-3-15(2)23(24)25-10-4-5-16-6-8-19-18(11-16)13-21(28-19)17-7-9-20-22(12-17)27-14-26-20/h6-9,11-13,15H,3-5,10,14H2,1-2H3/t15-/m0/s1	CC[C@@H](C(=O)OCCCc1ccc2c(c1)cc(o2)c1ccc2c(c1)OCO2)C	P22303	1
7-Methoxy-3-(4-Methoxyphenyl)Chromen-4-One	Isoflavones	7-methoxy-3-(4-methoxyphenyl)chromen-4-one	C17H14O4	LPNBCGIVZXHHHO-UHFFFAOYSA-N	InChI=1S/C17H14O4/c1-19-12-5-3-11(4-6-12)15-10-21-16-9-13(20-2)7-8-14(16)17(15)18/h3-10H,1-2H3	COc1ccc(cc1)c1coc2c(c1=O)ccc(c2)OC	O94782,Q16236,Q03431,P84022,Q9UNA4,Q13148,P38398	7
7-Hydroxyflavanone	Flavanones	7-hydroxy-2-phenyl-2,3-dihydrochromen-4-one	C15H12O3	SWAJPHCXKPCPQZ-UHFFFAOYSA-N	InChI=1S/C15H12O3/c16-11-6-7-12-13(17)9-14(18-15(12)8-11)10-4-2-1-3-5-10/h1-8,14,16H,9H2	Oc1ccc2c(c1)OC(CC2=O)c1ccccc1	P11511,P43220,P04637,P27338,P38398	5
Dehydrorotenone	Isoflavones	</td></tr>\r\n\t\t\t\t<tr><td align=right><b>Synonyms: &nbsp</b>	C23H20O6	GFERNZCCTZEIET-MRXNPFEDSA-N	InChI=1S/C23H20O6/c1-11(2)16-8-14-15(28-16)6-5-12-22(24)21-13-7-18(25-3)19(26-4)9-17(13)27-10-20(21)29-23(12)14/h5-7,9,16H,1,8,10H2,2-4H3/t16-/m1/s1	COc1cc2c(cc1OC)OCc1c2c(=O)c2c(o1)c1C[C@@H](Oc1cc2)C(=C)C	Q9NPD5,Q9Y6L6	2
(2S)-7-[(2S,3R,4S,5S,6R)-4,5-Dihydroxy-6-(Hydroxymethyl)-3-[(3R,4R,5R,6S)-3,4,5-Trihydroxy-6-Methyloxan-2-Yl]Oxyoxan-2-Yl]Oxy-5-Hydroxy-2-(3-Hydroxy-4-Methoxyphenyl)-2,3-Dihydrochromen-4-One	Flavanones	(2S)-7-[(2S,3R,4S,5S,6R)-4,5-dihydroxy-6-(hydroxymethyl)-3-[(3R,4R,5R,6S)-3,4,5-trihydroxy-6-methyloxan-2-yl]oxyoxan-2-yl]oxy-5-hydroxy-2-(3-hydroxy-4-methoxyphenyl)-2,3-dihydrochromen-4-one	C28H34O15	ARGKVCXINMKCAZ-QGFYHPQASA-N	InChI=1S/C28H34O15/c1-10-21(33)23(35)25(37)27(39-10)43-26-24(36)22(34)19(9-29)42-28(26)40-12-6-14(31)20-15(32)8-17(41-18(20)7-12)11-3-4-16(38-2)13(30)5-11/h3-7,10,17,19,21-31,33-37H,8-9H2,1-2H3/t10-,17-,19+,21-,22+,23+,24-,25+,26+,27?,28+/m0/s1	OC[C@H]1O[C@@H](Oc2cc3O[C@@H](CC(=O)c3c(c2)O)c2ccc(c(c2)O)OC)[C@@H]([C@H]([C@@H]1O)O)OC1O[C@@H](C)[C@@H]([C@H]([C@H]1O)O)O	Q9UBT6	1
Abyssinone V	Flavanones	(2S)-5,7-dihydroxy-2-[4-hydroxy-3,5-bis(3-methylbut-2-enyl)phenyl]-2,3-dihydrochromen-4-one	C25H28O5	LQHKFMYWTKORCE-QFIPXVFZSA-N	InChI=1S/C25H28O5/c1-14(2)5-7-16-9-18(10-17(25(16)29)8-6-15(3)4)22-13-21(28)24-20(27)11-19(26)12-23(24)30-22/h5-6,9-12,22,26-27,29H,7-8,13H2,1-4H3/t22-/m0/s1	CC(=CCc1cc(cc(c1O)CC=C(C)C)[C@@H]1CC(=O)c2c(O1)cc(cc2O)O)C	P18031,P04054	2
3-[(2S,5R)-3,4-Dihydroxy-5-(Hydroxymethyl)Oxolan-2-Yl]Oxy-2-(3,4-Dihydroxyphenyl)-5,7-Dihydroxychromen-4-One	Flavonols	3-[(2S,5R)-3,4-dihydroxy-5-(hydroxymethyl)oxolan-2-yl]oxy-2-(3,4-dihydroxyphenyl)-5,7-dihydroxychromen-4-one	C20H18O11	BDCDNTVZSILEOY-MRTZERJCSA-N	InChI=1S/C20H18O11/c21-6-13-15(26)17(28)20(30-13)31-19-16(27)14-11(25)4-8(22)5-12(14)29-18(19)7-1-2-9(23)10(24)3-7/h1-5,13,15,17,20-26,28H,6H2/t13-,15?,17?,20+/m1/s1	OC[C@H]1O[C@H](C(C1O)O)Oc1c(oc2c(c1=O)c(O)cc(c2)O)c1ccc(c(c1)O)O	O94925,Q9Y468,P11308,Q9UBT6,P39748,O75496,Q9UNA4,Q96QE3	8
b"(2S)-2,3,5,6,7-Pentahydroxyflavanone"	Flavanonol	(2R,3R)-2-(2,6-dihydroxyphenyl)-3,5,7-trihydroxy-2,3-dihydrochromen-4-one	C15H12O7	NBQYBZYBTNQEQG-LSDHHAIUSA-N	InChI=1S/C15H12O7/c16-6-4-9(19)12-10(5-6)22-15(14(21)13(12)20)11-7(17)2-1-3-8(11)18/h1-5,14-19,21H/t14-,15+/m0/s1	Oc1cc2O[C@H](c3c(O)cccc3O)[C@H](C(=O)c2c(c1)O)O	P35030	1
Marein	Others	(E)-3-(3,4-dihydroxyphenyl)-1-[2,3-dihydroxy-4-[(2S,3R,4S,5S,6R)-3,4,5-trihydroxy-6-(hydroxymethyl)oxan-2-yl]oxyphenyl]prop-2-en-1-one	C21H22O11	XGEYXJDOVMEJNG-HTFDPZBKSA-N	InChI=1S/C21H22O11/c22-8-15-18(28)19(29)20(30)21(32-15)31-14-6-3-10(16(26)17(14)27)11(23)4-1-9-2-5-12(24)13(25)7-9/h1-7,15,18-22,24-30H,8H2/b4-1+/t15-,18-,19+,20-,21-/m1/s1	OC[C@H]1O[C@@H](Oc2ccc(c(c2O)O)C(=O)/C=C/c2ccc(c(c2)O)O)[C@@H]([C@H]([C@@H]1O)O)O	P27695,Q9UBT6,Q9NUW8,P11473,P10253,P00533	6
Osajin	Isoflavones	5-hydroxy-3-(4-hydroxyphenyl)-8,8-dimethyl-6-(3-methylbut-2-enyl)pyrano[2,3-h]chromen-4-one	C25H24O5	DCTLJGWMHPGCOS-UHFFFAOYSA-N	InChI=1S/C25H24O5/c1-14(2)5-10-17-21(27)20-22(28)19(15-6-8-16(26)9-7-15)13-29-24(20)18-11-12-25(3,4)30-23(17)18/h5-9,11-13,26-27H,10H2,1-4H3	CC(=CCc1c2OC(C)(C)C=Cc2c2c(c1O)c(=O)c(co2)c1ccc(cc1)O)C	P04062,Q9NPD5,Q9Y6L6,Q16637,Q969S8,P84022,P17405,P00352,P02545,O75496,Q13526,Q9UIF8,P42858,P28482,Q9Y253,P18031,O00167,Q9UBT6,P10636,Q16236	20
Nymphaeol A	Flavanones	(2S)-2-(3,4-dihydroxyphenyl)-6-[(2E)-3,7-dimethylocta-2,6-dienyl]-5,7-dihydroxy-2,3-dihydrochromen-4-one	C25H28O6	XCYSQFHYFNWYFP-CEMXSPGASA-N	InChI=1S/C25H28O6/c1-14(2)5-4-6-15(3)7-9-17-19(27)12-23-24(25(17)30)21(29)13-22(31-23)16-8-10-18(26)20(28)11-16/h5,7-8,10-12,22,26-28,30H,4,6,9,13H2,1-3H3/b15-7+/t22-/m0/s1	C/C(=CCc1c(O)cc2c(c1O)C(=O)C[C@H](O2)c1ccc(c(c1)O)O)/CCC=C(C)C	P22303	1
b"Quercitrin 2-O-Gallate"	Flavonols	[(2S,3R,4R,5R,6S)-2-[2-(3,4-dihydroxyphenyl)-5,7-dihydroxy-4-oxochromen-3-yl]oxy-4,5-dihydroxy-6-methyloxan-3-yl] 3,4,5-trihydroxybenzoate	C28H24O15	KTTNFIOZYNBKEY-YIOJSCHVSA-N	InChI=1S/C28H24O15/c1-9-20(35)23(38)26(42-27(39)11-5-16(33)21(36)17(34)6-11)28(40-9)43-25-22(37)19-15(32)7-12(29)8-18(19)41-24(25)10-2-3-13(30)14(31)4-10/h2-9,20,23,26,28-36,38H,1H3/t9-,20-,23+,26+,28-/m0/s1	Oc1cc(O)c2c(c1)oc(c(c2=O)O[C@@H]1O[C@@H](C)[C@@H]([C@H]([C@H]1OC(=O)c1cc(O)c(c(c1)O)O)O)O)c1ccc(c(c1)O)O	P34913	1
(3S,4R)-3-(4-hydroxy-3-methoxyphenyl)-3,4-dihydro-2H-chromen-4-ol	Others	(3S,4R)-3-(4-hydroxy-3-methoxyphenyl)-3,4-dihydro-2H-chromen-4-ol	C16H16O4	MOQNWTYYZUVPQT-WBMJQRKESA-N	InChI=1S/C16H16O4/c1-19-15-8-10(6-7-13(15)17)12-9-20-14-5-3-2-4-11(14)16(12)18/h2-8,12,16-18H,9H2,1H3/t12-,16+/m1/s1	COc1cc(ccc1O)[C@H]1COc2c([C@@H]1O)cccc2	P10635,P08684	2
5,7-Dihydroxy-3-Methoxy-2-Phenylchromen-4-One	Flavonols	5,7-dihydroxy-3-methoxy-2-phenylchromen-4-one	C16H12O5	LYISDADPVOHJBJ-UHFFFAOYSA-N	InChI=1S/C16H12O5/c1-20-16-14(19)13-11(18)7-10(17)8-12(13)21-15(16)9-5-3-2-4-6-9/h2-8,17-18H,1H3	COc1c(oc2c(c1=O)c(O)cc(c2)O)c1ccccc1	P08183	1
5,7-Dihydroxy-2-(4-Hydroxyphenyl)-6-Methyl-2,3-Dihydrochromen-4-One	Flavanones	5,7-dihydroxy-2-(4-hydroxyphenyl)-6-methyl-2,3-dihydrochromen-4-one	C16H14O5	SLFZBNOERHGNMI-UHFFFAOYSA-N	InChI=1S/C16H14O5/c1-8-11(18)6-14-15(16(8)20)12(19)7-13(21-14)9-2-4-10(17)5-3-9/h2-6,13,17-18,20H,7H2,1H3	Oc1ccc(cc1)C1CC(=O)c2c(O1)cc(c(c2O)C)O	P27695,Q02410,P06746,P39748,O75164,P11473,Q9Y468,Q13526,Q9UIF8,P63092,P46063,Q07820,Q9NR56,Q9Y253,Q9GZU7,Q9UNA4	16
7-Demethoxyegonol Oleate	Others	3-[2-(1,3-benzodioxol-5-yl)-1-benzofuran-5-yl]propyl (Z)-octadec-9-enoate	C36H48O5	GIGIGVBVJACSBJ-KTKRTIGZSA-N	InChI=1S/C36H48O5/c1-2-3-4-5-6-7-8-9-10-11-12-13-14-15-16-19-36(37)38-24-17-18-29-20-22-32-31(25-29)27-34(41-32)30-21-23-33-35(26-30)40-28-39-33/h9-10,20-23,25-27H,2-8,11-19,24,28H2,1H3/b10-9-	CCCCCCCC/C=CCCCCCCCC(=O)OCCCc1ccc2c(c1)cc(o2)c1ccc2c(c1)OCO2	P22303	1
Miconioside A	Flavanones	(2S)-5-hydroxy-2-(4-methoxyphenyl)-6,8-dimethyl-7-[(2S,3R,4S,5S,6R)-3,4,5-trihydroxy-6-[[(2S,3R,4S,5S)-3,4,5-trihydroxyoxan-2-yl]oxymethyl]oxan-2-yl]oxy-2,3-dihydrochromen-4-one	C29H36O14	CUEAVYXDEUPPTP-LNRHCFMRSA-N	InChI=1S/C29H36O14/c1-11-20(32)19-15(30)8-17(13-4-6-14(38-3)7-5-13)41-27(19)12(2)26(11)43-29-25(37)23(35)22(34)18(42-29)10-40-28-24(36)21(33)16(31)9-39-28/h4-7,16-18,21-25,28-29,31-37H,8-10H2,1-3H3/t16-,17-,18+,21-,22+,23-,24+,25+,28-,29-/m0/s1	COc1ccc(cc1)[C@@H]1CC(=O)c2c(O1)c(C)c(c(c2O)C)O[C@@H]1O[C@H](CO[C@@H]2OC[C@@H]([C@@H]([C@H]2O)O)O)[C@H]([C@@H]([C@H]1O)O)O	P49327	1
Dimethyl Lithospermate	Others	methyl (2S,3S)-2-(3,4-dihydroxyphenyl)-4-[(E)-3-[(2R)-3-(3,4-dihydroxyphenyl)-1-methoxy-1-oxopropan-2-yl]oxy-3-oxoprop-1-enyl]-7-hydroxy-2,3-dihydro-1-benzofuran-3-carboxylate	C29H26O12	YAXTXMBBIHBGPZ-ZBBBDWFHSA-N	InChI=1S/C29H26O12/c1-38-28(36)22(12-14-3-7-17(30)20(33)11-14)40-23(35)10-6-15-4-9-19(32)27-24(15)25(29(37)39-2)26(41-27)16-5-8-18(31)21(34)13-16/h3-11,13,22,25-26,30-34H,12H2,1-2H3/b10-6+/t22-,25+,26-/m1/s1	COC(=O)[C@@H](Cc1ccc(c(c1)O)O)OC(=O)/C=C/c1ccc(c2c1[C@H](C(=O)OC)[C@H](O2)c1ccc(c(c1)O)O)O	P45452,P14780,P08253,P39900,P03956,P08254	6
(Z)-2-(3,4-Dihydroxybenzylidene)-6,7-Dihydroxybenzofuran-3(2H)-One	Others	(2Z)-2-[(3,4-dihydroxyphenyl)methylidene]-6,7-dihydroxy-1-benzofuran-3-one	C15H10O6	PNIFOHGQPKXLJE-SDQBBNPISA-N	InChI=1S/C15H10O6/c16-9-3-1-7(5-11(9)18)6-12-13(19)8-2-4-10(17)14(20)15(8)21-12/h1-6,16-18,20H/b12-6-	O=C1/C(=C/c2ccc(c(c2)O)O)/Oc2c1ccc(c2O)O	P05067	1
Ichthynone	Isoflavones	6-methoxy-3-(6-methoxy-1,3-benzodioxol-5-yl)-8,8-dimethylpyrano[2,3-h]chromen-4-one	C23H20O7	NPYOKEDYJXYSTA-UHFFFAOYSA-N	InChI=1S/C23H20O7/c1-23(2)6-5-12-21-14(8-19(26-4)22(12)30-23)20(24)15(10-27-21)13-7-17-18(29-11-28-17)9-16(13)25-3/h5-10H,11H2,1-4H3	COc1cc2c(=O)c(coc2c2c1OC(C)(C)C=C2)c1cc2OCOc2cc1OC	Q9NPD5,Q9Y6L6	2
Glycyrin	Others	3-(2,4-dihydroxyphenyl)-5,7-dimethoxy-6-(3-methylbut-2-enyl)chromen-2-one	C22H22O6	FWWGXZYUURXJLK-UHFFFAOYSA-N	InChI=1S/C22H22O6/c1-12(2)5-7-15-19(26-3)11-20-17(21(15)27-4)10-16(22(25)28-20)14-8-6-13(23)9-18(14)24/h5-6,8-11,23-24H,7H2,1-4H3	COc1c(CC=C(C)C)c(OC)cc2c1cc(c(=O)o2)c1ccc(cc1O)O	Q16236	1
Moracin C	Others	5-(6-hydroxy-1-benzofuran-2-yl)-2-(3-methylbut-2-enyl)benzene-1,3-diol	C19H18O4	ZTGHWUWBQNCCOH-UHFFFAOYSA-N	InChI=1S/C19H18O4/c1-11(2)3-6-15-16(21)7-13(8-17(15)22)18-9-12-4-5-14(20)10-19(12)23-18/h3-5,7-10,20-22H,6H2,1-2H3	CC(=CCc1c(O)cc(cc1O)c1cc2c(o1)cc(cc2)O)C	Q08499,O76083,Q07343,O76074	4
(+)-Taxifolin	Flavanonol	(2R,3R)-2-(3,4-dihydroxyphenyl)-3,5,7-trihydroxy-2,3-dihydrochromen-4-one	C15H12O7	CXQWRCVTCMQVQX-LSDHHAIUSA-N	InChI=1S/C15H12O7/c16-7-4-10(19)12-11(5-7)22-15(14(21)13(12)20)6-1-2-8(17)9(18)3-6/h1-5,14-19,21H/t14-,15+/m0/s1	Oc1cc2O[C@H](c3ccc(c(c3)O)O)[C@H](C(=O)c2c(c1)O)O	P06746,P39748,P10721,P05067,O75496,Q9UIF8,P46063,Q9UNA4,P10636,Q04759,P56817,B2RXH2,P10253	13
Baicalein	Flavones	5,6,7-trihydroxy-2-phenylchromen-4-one	C15H10O5	FXNFHKRTJBSTCS-UHFFFAOYSA-N	InChI=1S/C15H10O5/c16-9-6-11(8-4-2-1-3-5-8)20-12-7-10(17)14(18)15(19)13(9)12/h1-7,17-19H	Oc1cc2oc(cc(=O)c2c(c1O)O)c1ccccc1	P80404,P47989,P34969,P16050,P22309,P14410,Q13526,Q99714,Q9Y253,P10636,P05412,P27695,P68871,Q9NPD5,Q9Y6L6,P18054,P37058,P16220,P00352,Q16445,O75496,P54132,P10828,Q03164,P15428,P35030,P05177,Q9UNA4,P14151,Q13332,Q9HC97,P27487,P06493,P04798,Q9Y3R4,P11309,O15296,Q04760,Q14191,B2RXH2,P10253,P16109,O75164,P16581,P48147,P54855,P03372,P46063,Q96QE3,Q9UBT6,P53355,P08684,P09917,P43250	54
b"(S)-5,7,8-Trihydroxy-2,2-Dimethyl-5-(3-Methylbut-2-Enyl)-2,6-Bichroman-4-One"	Flavanones	(2S)-5,7-dihydroxy-2-[8-hydroxy-2,2-dimethyl-5-(3-methylbut-2-enyl)chromen-6-yl]-2,3-dihydrochromen-4-one	C25H26O6	DOHUWPORVBGXGM-NRFANRHFSA-N	InChI=1S/C25H26O6/c1-13(2)5-6-15-16-7-8-25(3,4)31-24(16)20(29)11-17(15)21-12-19(28)23-18(27)9-14(26)10-22(23)30-21/h5,7-11,21,26-27,29H,6,12H2,1-4H3/t21-/m0/s1	CC(=CCc1c(cc(c2c1C=CC(O2)(C)C)O)[C@@H]1CC(=O)c2c(O1)cc(cc2O)O)C	P18031	1
Resveratrol (E)-Dehydrodimer 11-O-Beta-D-Glucopyranoside	Others	(2S,3R,4S,5S,6R)-2-[3-[(2S,3S)-5-[(E)-2-(3,5-dihydroxyphenyl)ethenyl]-2-(4-hydroxyphenyl)-2,3-dihydro-1-benzofuran-3-yl]-5-hydroxyphenoxy]-6-(hydroxymethyl)oxane-3,4,5-triol	C34H32O11	ZJIBDVBTKQSZQZ-REZQOROLSA-N	InChI=1S/C34H32O11/c35-16-28-30(40)31(41)32(42)34(45-28)43-25-13-20(12-24(39)15-25)29-26-11-17(1-2-18-9-22(37)14-23(38)10-18)3-8-27(26)44-33(29)19-4-6-21(36)7-5-19/h1-15,28-42H,16H2/b2-1+/t28-,29+,30-,31+,32-,33-,34-/m1/s1	OC[C@H]1O[C@@H](Oc2cc(O)cc(c2)[C@@H]2[C@H](Oc3c2cc(/C=C/c2cc(O)cc(c2)O)cc3)c2ccc(cc2)O)[C@@H]([C@H]([C@@H]1O)O)O	P35354,P23219	2
Spiraeoside	Flavonols	3,5,7-trihydroxy-2-[3-hydroxy-4-[(2S,3R,4S,5S,6R)-3,4,5-trihydroxy-6-(hydroxymethyl)oxan-2-yl]oxyphenyl]chromen-4-one	C21H20O12	OIUBYZLTFSLSBY-HMGRVEAOSA-N	InChI=1S/C21H20O12/c22-6-13-15(26)17(28)19(30)21(33-13)32-11-2-1-7(3-9(11)24)20-18(29)16(27)14-10(25)4-8(23)5-12(14)31-20/h1-5,13,15,17,19,21-26,28-30H,6H2/t13-,15-,17+,19-,21-/m1/s1	OC[C@H]1O[C@@H](Oc2ccc(cc2O)c2oc3cc(O)cc(c3c(=O)c2O)O)[C@@H]([C@H]([C@@H]1O)O)O	P27695,P15121,Q03164,P00747,P10253	5
Erybreadin D	Others	</td></tr>\r\n\t\t\t\t<tr><td align=right><b>Synonyms: &nbsp</b>	C25H26O4	YODBFZQPDZJGJG-CVDCTZTESA-N	InChI=1S/C25H26O4/c1-14(2)5-7-17-20(26)10-9-18-22(17)27-13-19-16-8-6-15-11-12-25(3,4)29-21(15)24(16)28-23(18)19/h5-6,8-12,19,23,26H,7,13H2,1-4H3/t19-,23-/m0/s1	CC(=CCc1c(O)ccc2c1OC[C@@H]1[C@H]2Oc2c1ccc1c2OC(C)(C)C=C1)C	P18031	1
Quercetin-3-O-Rhamnoside	Flavonols	2-(3,4-dihydroxyphenyl)-5,7-dihydroxy-3-[(2R,3S,4S,5S,6R)-3,4,5-trihydroxy-6-methyloxan-2-yl]oxychromen-4-one	C21H20O11	OXGUCUVFOIWWQJ-JHPRLSDPSA-N	InChI=1S/C21H20O11/c1-7-15(26)17(28)18(29)21(30-7)32-20-16(27)14-12(25)5-9(22)6-13(14)31-19(20)8-2-3-10(23)11(24)4-8/h2-7,15,17-18,21-26,28-29H,1H3/t7-,15-,17+,18+,21-/m1/s1	Oc1cc(O)c2c(c1)oc(c(c2=O)O[C@H]1O[C@H](C)[C@H]([C@@H]([C@@H]1O)O)O)c1ccc(c(c1)O)O	O43570,P00918,P43166,P22748,P00915	5
Isosilybin A	Flavanonol	(2R,3R)-3,5,7-trihydroxy-2-[(2R,3R)-2-(4-hydroxy-3-methoxyphenyl)-3-(hydroxymethyl)-2,3-dihydro-1,4-benzodioxin-6-yl]-2,3-dihydrochromen-4-one	C25H22O10	FDQAOULAVFHKBX-HKTJVKLFSA-N	InChI=1S/C25H22O10/c1-32-17-6-11(2-4-14(17)28)24-20(10-26)33-18-7-12(3-5-16(18)34-24)25-23(31)22(30)21-15(29)8-13(27)9-19(21)35-25/h2-9,20,23-29,31H,10H2,1H3/t20-,23+,24-,25-/m1/s1	OC[C@H]1Oc2cc(ccc2O[C@@H]1c1ccc(c(c1)OC)O)[C@H]1Oc2cc(O)cc(c2C(=O)[C@@H]1O)O	P37231	1
Pelargonidin	Others	2-(4-hydroxyphenyl)chromenylium-3,5,7-triol	C15H10O5	XVFMGWDSJLBXDZ-UHFFFAOYSA-O	InChI=1S/C15H10O5/c16-9-3-1-8(2-4-9)15-13(19)7-11-12(18)5-10(17)6-14(11)20-15/h1-7H,(H3-,16,17,18,19)/p+1	Oc1ccc(cc1)c1[o+]c2cc(O)cc(c2cc1O)O	P28907,P53355	2
b"Dalbergione, 4-Methoxy-4-Hydroxy-"	Others	2-[1-(4-hydroxyphenyl)prop-2-enyl]-5-methoxycyclohexa-2,5-diene-1,4-dione	C16H14O4	DLCVFIMWFKVRTM-UHFFFAOYSA-N	InChI=1S/C16H14O4/c1-3-12(10-4-6-11(17)7-5-10)13-8-15(19)16(20-2)9-14(13)18/h3-9,12,17H,1H2,2H3	COC1=CC(=O)C(=CC1=O)C(c1ccc(cc1)O)C=C	P10636,Q9NPD5,Q9Y6L6,O15296,B2RXH2	5
b"(2S)-6-(Gamma,Gamma-Dimethylallyl)-3,4-Dimethoxy-6,6-Dimethylpyran[2,3:7,8]Flavanone"	Flavanones	(2S)-2-(3,4-dimethoxyphenyl)-8,8-dimethyl-6-(3-methylbut-2-enyl)-2,3-dihydropyrano[2,3-h]chromen-4-one	C27H30O5	KJBZFWLVOZNDBN-QHCPKHFHSA-N	InChI=1S/C27H30O5/c1-16(2)7-8-18-13-20-21(28)15-23(17-9-10-22(29-5)24(14-17)30-6)31-26(20)19-11-12-27(3,4)32-25(18)19/h7,9-14,23H,8,15H2,1-6H3/t23-/m0/s1	COc1cc(ccc1OC)[C@@H]1CC(=O)c2c(O1)c1C=CC(Oc1c(c2)CC=C(C)C)(C)C	P11926	1
b"(2S)-2,4-Dihydroxy-7-Methoxy-8-Prenylflavan"	Others	4-[(2S)-5-hydroxy-7-methoxy-8-(3-methylbut-2-enyl)-3,4-dihydro-2H-chromen-2-yl]benzene-1,3-diol	C21H24O5	NKWZCXSFJQEDSE-IBGZPJMESA-N	InChI=1S/C21H24O5/c1-12(2)4-6-16-20(25-3)11-18(24)15-8-9-19(26-21(15)16)14-7-5-13(22)10-17(14)23/h4-5,7,10-11,19,22-24H,6,8-9H2,1-3H3/t19-/m0/s1	COc1cc(O)c2c(c1CC=C(C)C)O[C@@H](CC2)c1ccc(cc1O)O	P11511	1
Sotetsuflavone	Flavones	8-[5-(5,7-dihydroxy-4-oxochromen-2-yl)-2-hydroxyphenyl]-5-hydroxy-2-(4-hydroxyphenyl)-7-methoxychromen-4-one	C31H20O10	OIFVLHZEBAXHPM-UHFFFAOYSA-N	InChI=1S/C31H20O10/c1-39-26-13-23(38)30-22(37)12-24(14-2-5-16(32)6-3-14)41-31(30)28(26)18-8-15(4-7-19(18)34)25-11-21(36)29-20(35)9-17(33)10-27(29)40-25/h2-13,32-35,38H,1H3	COc1cc(O)c2c(c1c1cc(ccc1O)c1cc(=O)c3c(o1)cc(cc3O)O)oc(cc2=O)c1ccc(cc1)O	P56817	1
b"(-)-Epigallocatechin-3-(3-O-Methyl)Gallate"	Flavan-3-ols	[(2R,3R)-5,7-dihydroxy-2-(3,4,5-trihydroxyphenyl)-3,4-dihydro-2H-chromen-3-yl] 3,4-dihydroxy-5-methoxybenzoate	C23H20O11	WVRDOLPMKOCJRJ-DENIHFKCSA-N	InChI=1S/C23H20O11/c1-32-18-5-10(4-16(28)21(18)30)23(31)34-19-8-12-13(25)6-11(24)7-17(12)33-22(19)9-2-14(26)20(29)15(27)3-9/h2-7,19,22,24-30H,8H2,1H3/t19-,22-/m1/s1	COc1cc(cc(c1O)O)C(=O)O[C@@H]1Cc2c(O)cc(cc2O[C@@H]1c1cc(O)c(c(c1)O)O)O	P08253,P50281,P09237	3
Pratol	Flavones	7-hydroxy-2-(4-methoxyphenyl)chromen-4-one	C16H12O4	SQVXWIUVAILQRH-UHFFFAOYSA-N	InChI=1S/C16H12O4/c1-19-12-5-2-10(3-6-12)15-9-14(18)13-7-4-11(17)8-16(13)20-15/h2-9,17H,1H3	COc1ccc(cc1)c1cc(=O)c2c(o1)cc(cc2)O	P11712,Q9H2K2,P11308,P09874,Q03164,Q9UBT6,P08684,P04637,Q13526,P63092,O95271,Q16769,P33261,P38398	14
3-Hydroxyglabrol	Flavanonol	(2R,3R)-3,7-dihydroxy-2-[4-hydroxy-3-(3-methylbut-2-enyl)phenyl]-8-(3-methylbut-2-enyl)-2,3-dihydrochromen-4-one	C25H28O5	LAQLCZKPJGMFRM-BJKOFHAPSA-N	InChI=1S/C25H28O5/c1-14(2)5-7-16-13-17(8-11-20(16)26)24-23(29)22(28)19-10-12-21(27)18(25(19)30-24)9-6-15(3)4/h5-6,8,10-13,23-24,26-27,29H,7,9H2,1-4H3/t23-,24+/m0/s1	CC(=CCc1cc(ccc1O)[C@H]1Oc2c(C(=O)[C@@H]1O)ccc(c2CC=C(C)C)O)C	P18031	1
Rhamnetin	Flavonols	2-(3,4-dihydroxyphenyl)-3,5-dihydroxy-7-methoxychromen-4-one	C16H12O7	JGUZGNYPMHHYRK-UHFFFAOYSA-N	InChI=1S/C16H12O7/c1-22-8-5-11(19)13-12(6-8)23-16(15(21)14(13)20)7-2-3-9(17)10(18)4-7/h2-6,17-19,21H,1H3	COc1cc(O)c2c(c1)oc(c(c2=O)O)c1ccc(c(c1)O)O	P15121,Q9NPD5,Q9Y6L6,P02545,P04745,P46063,O15296,P10828,Q03164,Q9UBT6,P10636,B2RXH2	12
3-[5,7-Dihydroxy-2-(4-Hydroxyphenyl)-4-Oxochromen-8-Yl]-5,7-Dihydroxy-2-(4-Hydroxyphenyl)Chromen-4-One	Isoflavones	3-[5,7-dihydroxy-2-(4-hydroxyphenyl)-4-oxochromen-8-yl]-5,7-dihydroxy-2-(4-hydroxyphenyl)chromen-4-one	C30H18O10	IQAMTZLKUHMPPE-UHFFFAOYSA-N	InChI=1S/C30H18O10/c31-15-5-1-13(2-6-15)22-12-21(37)24-19(35)11-20(36)26(30(24)39-22)27-28(38)25-18(34)9-17(33)10-23(25)40-29(27)14-3-7-16(32)8-4-14/h1-12,31-36H	Oc1ccc(cc1)c1cc(=O)c2c(o1)c(c(cc2O)O)c1c(oc2c(c1=O)c(O)cc(c2)O)c1ccc(cc1)O	P27695,P04062,P06746,P53350,O75164,Q03431,P63165,P14618,B2RXH2,O75496,P46063,Q07820,Q9Y253,P18031,Q14191,P10636,P08684,Q9UNA4	18
Ayanin	Flavonols	5-hydroxy-2-(3-hydroxy-4-methoxyphenyl)-3,7-dimethoxychromen-4-one	C18H16O7	KPCRYSMUMBNTCK-UHFFFAOYSA-N	InChI=1S/C18H16O7/c1-22-10-7-12(20)15-14(8-10)25-17(18(24-3)16(15)21)9-4-5-13(23-2)11(19)6-9/h4-8,19-20H,1-3H3	COc1cc(O)c2c(c1)oc(c(c2=O)OC)c1ccc(c(c1)O)OC	Q9BUF5,P33527,Q9UNQ0,P08183	4
Angolensin	Others	1-(2,4-dihydroxyphenyl)-2-(4-methoxyphenyl)propan-1-one	C16H16O4	CCOJFDRSZSSKOG-UHFFFAOYSA-N	InChI=1S/C16H16O4/c1-10(11-3-6-13(20-2)7-4-11)16(19)14-8-5-12(17)9-15(14)18/h3-10,17-18H,1-2H3	COc1ccc(cc1)C(C(=O)c1ccc(cc1O)O)C	O94782,Q03164,P10636,P37231	4
Gallocatechin	Flavan-3-ols	(2R,3S)-2-(3,4,5-trihydroxyphenyl)-3,4-dihydro-2H-chromene-3,5,7-triol	C15H14O7	XMOCLSLCDHWDHP-SWLSCSKDSA-N	InChI=1S/C15H14O7/c16-7-3-9(17)8-5-12(20)15(22-13(8)4-7)6-1-10(18)14(21)11(19)2-6/h1-4,12,15-21H,5H2/t12-,15+/m0/s1	Oc1cc2O[C@H](c3cc(O)c(c(c3)O)O)[C@H](Cc2c(c1)O)O	P35354,P23219,P56817	3
Miquelianin	Flavonols	2-(3,4-dihydroxyphenyl)-5,7-dihydroxy-3-[(2R,3R,4S,5S,6R)-3,4,5-trihydroxy-6-(hydroxymethyl)oxan-2-yl]oxychromen-4-one	C21H20O12	OVSQVDMCBVZWGM-DHALZPNHSA-N	InChI=1S/C21H20O12/c22-6-13-15(27)17(29)18(30)21(32-13)33-20-16(28)14-11(26)4-8(23)5-12(14)31-19(20)7-1-2-9(24)10(25)3-7/h1-5,13,15,17-18,21-27,29-30H,6H2/t13-,15-,17+,18-,21-/m1/s1	OC[C@H]1O[C@H](Oc2c(oc3c(c2=O)c(O)cc(c3)O)c2ccc(c(c2)O)O)[C@@H]([C@H]([C@@H]1O)O)O	Q9NPH5,P18825	2
Microfolione	Flavanones	(2R)-5,7-dihydroxy-8-methoxy-6-(3-methylbut-2-enyl)-2-phenyl-2,3-dihydrochromen-4-one	C21H22O5	IMGRRXXTMXIKTA-MRXNPFEDSA-N	InChI=1S/C21H22O5/c1-12(2)9-10-14-18(23)17-15(22)11-16(13-7-5-4-6-8-13)26-20(17)21(25-3)19(14)24/h4-9,16,23-24H,10-11H2,1-3H3/t16-/m1/s1	COc1c2O[C@H](CC(=O)c2c(c(c1O)CC=C(C)C)O)c1ccccc1	Q92731	1
2-[5-(3-Hydroxypropyl)-1-Benzofuran-2-Yl]-5-Methoxyphenol	Others	2-[5-(3-hydroxypropyl)-1-benzofuran-2-yl]-5-methoxyphenol	C18H18O4	DZMMGSFVLBBPIA-UHFFFAOYSA-N	InChI=1S/C18H18O4/c1-21-14-5-6-15(16(20)11-14)18-10-13-9-12(3-2-8-19)4-7-17(13)22-18/h4-7,9-11,19-20H,2-3,8H2,1H3	OCCCc1ccc2c(c1)cc(o2)c1ccc(cc1O)OC	O14684,P09917	2
Kushenol T	Flavanones	(2S)-5,7-dihydroxy-8-[(2R)-5-hydroxy-5-methyl-2-prop-1-en-2-ylhexyl]-2-(2-hydroxyphenyl)-2,3-dihydrochromen-4-one	C25H30O6	PMFICSJNAUBMIQ-QRQCRPRQSA-N	InChI=1S/C25H30O6/c1-14(2)15(9-10-25(3,4)30)11-17-19(27)12-20(28)23-21(29)13-22(31-24(17)23)16-7-5-6-8-18(16)26/h5-8,12,15,22,26-28,30H,1,9-11,13H2,2-4H3/t15-,22+/m1/s1	CC(=C)[C@@H](Cc1c(O)cc(c2c1O[C@@H](CC2=O)c1ccccc1O)O)CCC(O)(C)C	P56817	1
Epicatechin-(4Beta-8)-Epicatechin-(4Beta-6)-Epicatechin	Flavan-3-ols	(2R,3R,4S)-2-(3,4-dihydroxyphenyl)-4-[(2R,3R)-2-(3,4-dihydroxyphenyl)-3,5,7-trihydroxy-3,4-dihydro-2H-chromen-6-yl]-8-[(2R,3R,4R)-2-(3,4-dihydroxyphenyl)-3,5,7-trihydroxy-3,4-dihydro-2H-chromen-4-yl]-3,4-dihydro-2H-chromene-3,5,7-triol	C45H38O18	PBYRKMXDROOXMU-KCXYZFMFSA-N	InChI=1S/C45H38O18/c46-18-10-26(53)33-32(11-18)62-43(16-2-5-21(48)24(51)8-16)40(59)37(33)35-27(54)13-28(55)36-38(41(60)44(63-45(35)36)17-3-6-22(49)25(52)9-17)34-29(56)14-31-19(39(34)58)12-30(57)42(61-31)15-1-4-20(47)23(50)7-15/h1-11,13-14,30,37-38,40-44,46-60H,12H2/t30-,37-,38+,40-,41-,42-,43-,44-/m1/s1	Oc1cc(O)c2c(c1)O[C@@H]([C@@H]([C@H]2c1c(O)cc(c2c1O[C@H](c1ccc(c(c1)O)O)[C@@H]([C@H]2c1c(O)cc2c(c1O)C[C@H]([C@H](O2)c1ccc(c(c1)O)O)O)O)O)O)c1ccc(c(c1)O)O	P14780,P08253	2
Techtochrysin	Flavones	5-hydroxy-7-methoxy-2-phenylchromen-4-one	C16H12O4	IRZVHDLBAYNPCT-UHFFFAOYSA-N	InChI=1S/C16H12O4/c1-19-11-7-12(17)16-13(18)9-14(20-15(16)8-11)10-5-3-2-4-6-10/h2-9,17H,1H3	COc1cc(O)c2c(c1)oc(cc2=O)c1ccccc1	P04062,P33261,O15118,Q03431,P16473,O75496,O95398,P08183,Q96QE3,P11712,P10636,P08684,P37840	13
b"4-O-Me-Ent-Gallocatechin"	Flavan-3-ols	(2S,3R)-2-(3,5-dihydroxy-4-methoxyphenyl)-3,4-dihydro-2H-chromene-3,5,7-triol	C16H16O7	ITDYPNOEEHONAH-HIFRSBDPSA-N	InChI=1S/C16H16O7/c1-22-16-11(19)2-7(3-12(16)20)15-13(21)6-9-10(18)4-8(17)5-14(9)23-15/h2-5,13,15,17-21H,6H2,1H3/t13-,15+/m1/s1	COc1c(O)cc(cc1O)[C@@H]1Oc2cc(O)cc(c2C[C@H]1O)O	P35354,P23219	2
6,7-Dihydroxy-4-Phenylcoumarin	Others	6,7-dihydroxy-4-phenylchromen-2-one	C15H10O4	TZRNJQYCOSMOJS-UHFFFAOYSA-N	InChI=1S/C15H10O4/c16-12-6-11-10(9-4-2-1-3-5-9)7-15(18)19-14(11)8-13(12)17/h1-8,16-17H	O=c1oc2cc(O)c(cc2c(c1)c1ccccc1)O	P15121,Q00796	2
Egonol Acetate	Others	3-[2-(1,3-benzodioxol-5-yl)-7-methoxy-1-benzofuran-5-yl]propyl acetate	C21H20O6	KOUYRIXNPBTZIN-UHFFFAOYSA-N	InChI=1S/C21H20O6/c1-13(22)24-7-3-4-14-8-16-11-18(27-21(16)20(9-14)23-2)15-5-6-17-19(10-15)26-12-25-17/h5-6,8-11H,3-4,7,12H2,1-2H3	COc1cc(CCCOC(=O)C)cc2c1oc(c2)c1ccc2c(c1)OCO2	P22303	1
Kaempferide	Flavonols	3,5,7-trihydroxy-2-(4-methoxyphenyl)chromen-4-one	C16H12O6	SQFSKOYWJBQGKQ-UHFFFAOYSA-N	InChI=1S/C16H12O6/c1-21-10-4-2-8(3-5-10)16-15(20)14(19)13-11(18)6-9(17)7-12(13)22-16/h2-7,17-18,20H,1H3	COc1ccc(cc1)c1oc2cc(O)cc(c2c(=O)c1O)O	P04798,P08183,P05177,Q16678	4
Sigmoidin D	Flavanones	(2S)-2-[(3S)-3,8-dihydroxy-2,2-dimethyl-3,4-dihydrochromen-6-yl]-5,7-dihydroxy-2,3-dihydrochromen-4-one	C20H20O7	ASQDBJSRWIDYKK-RDJZCZTQSA-N	InChI=1S/C20H20O7/c1-20(2)17(25)5-10-3-9(4-14(24)19(10)27-20)15-8-13(23)18-12(22)6-11(21)7-16(18)26-15/h3-4,6-7,15,17,21-22,24-25H,5,8H2,1-2H3/t15-,17-/m0/s1	Oc1cc2O[C@@H](CC(=O)c2c(c1)O)c1cc(O)c2c(c1)C[C@@H](C(O2)(C)C)O	P18031	1
b"5,4dihydroxy-3,6,7,8,3-Pentamethoxyflavone"	Flavonols	5-hydroxy-2-(4-hydroxy-3-methoxyphenyl)-3,6,7,8-tetramethoxychromen-4-one	C20H20O9	HCAGTMLWEWVIJA-UHFFFAOYSA-N	InChI=1S/C20H20O9/c1-24-11-8-9(6-7-10(11)21)15-17(25-2)13(22)12-14(23)18(26-3)20(28-5)19(27-4)16(12)29-15/h6-8,21,23H,1-5H3	COc1cc(ccc1O)c1oc2c(OC)c(OC)c(c(c2c(=O)c1OC)O)OC	Q9BUF5	1
Flavanone	Flavanones	2-phenyl-2,3-dihydrochromen-4-one	C15H12O2	ZONYXWQDUYMKFB-UHFFFAOYSA-N	InChI=1S/C15H12O2/c16-13-10-15(11-6-2-1-3-7-11)17-14-9-5-4-8-12(13)14/h1-9,15H,10H2	O=C1CC(Oc2c1cccc2)c1ccccc1	Q9NPD5,Q8WZA2,Q9Y6L6,P27338,P0DMS8,P83916,P10275,P14061,P11511,P37059,Q99714,Q13148,Q16236,B2RXH2	14
(2R,3S)-2-(3,4-Dihydroxyphenyl)-3,4-Dihydro-2H-Chromene-3,5,7-Triol;Hydrate	Flavan-3-ols	(2R,3S)-2-(3,4-dihydroxyphenyl)-3,4-dihydro-2H-chromene-3,5,7-triol;hydrate	C15H14O6.H2O	OFUMQWOJBVNKLR-NQQJLSKUSA-N	InChI=1S/C15H14O6.H2O/c16-8-4-11(18)9-6-13(20)15(21-14(9)5-8)7-1-2-10(17)12(19)3-7;/h1-5,13,15-20H,6H2;1H2/t13-,15+;/m0./s1	Oc1cc2O[C@H](c3ccc(c(c3)O)O)[C@H](Cc2c(c1)O)O.O	O94925,Q9UBT6,P06746,P05186,P10696,Q9UNA4,B2RXH2,P10253	8
Silybin	Flavanonol	(2R,3R)-3,5,7-trihydroxy-2-[(2S,3S)-3-(4-hydroxy-3-methoxyphenyl)-2-(hydroxymethyl)-2,3-dihydro-1,4-benzodioxin-6-yl]-2,3-dihydrochromen-4-one	C25H22O10	SEBFKMXJBCUCAI-WAABAYLZSA-N	InChI=1S/C25H22O10/c1-32-17-6-11(2-4-14(17)28)24-20(10-26)33-16-5-3-12(7-18(16)34-24)25-23(31)22(30)21-15(29)8-13(27)9-19(21)35-25/h2-9,20,23-29,31H,10H2,1H3/t20-,23-,24-,25+/m0/s1	OC[C@@H]1Oc2ccc(cc2O[C@H]1c1ccc(c(c1)OC)O)[C@H]1Oc2cc(O)cc(c2C(=O)[C@@H]1O)O	P11712,O94956,Q9NPD5,Q9Y6L6	4
Egonol-9(Z),12(Z)Linoleate	Others	3-[2-(1,3-benzodioxol-5-yl)-7-methoxy-1-benzofuran-5-yl]propyl (9Z,12Z)-octadeca-9,12-dienoate	C37H48O6	NHCDDUNWYVJRPS-NQLNTKRDSA-N	InChI=1S/C37H48O6/c1-3-4-5-6-7-8-9-10-11-12-13-14-15-16-17-20-36(38)40-23-18-19-29-24-31-27-33(43-37(31)35(25-29)39-2)30-21-22-32-34(26-30)42-28-41-32/h7-8,10-11,21-22,24-27H,3-6,9,12-20,23,28H2,1-2H3/b8-7-,11-10-	CCCCC/C=CC/C=CCCCCCCCC(=O)OCCCc1cc(OC)c2c(c1)cc(o2)c1ccc2c(c1)OCO2	P22303	1
(2Z)-2-[(4-Chlorophenyl)Methylidene]-1-Benzofuran-3-One	Others	(2Z)-2-[(4-chlorophenyl)methylidene]-1-benzofuran-3-one	C15H9ClO2	JIWJNEVCSMZRGO-ZROIWOOFSA-N	InChI=1S/C15H9ClO2/c16-11-7-5-10(6-8-11)9-14-15(17)12-3-1-2-4-13(12)18-14/h1-9H/b14-9-	Clc1ccc(cc1)/C=C/1Oc2c(C1=O)cccc2	P27338,Q969S8,P21397	3
Icariside Ii	Flavonols	5,7-dihydroxy-2-(4-methoxyphenyl)-8-(3-methylbut-2-enyl)-3-[(2S,3S,4S,5S,6R)-3,4,5-trihydroxy-6-methyloxan-2-yl]oxychromen-4-one	C27H30O10	NGMYNFJANBHLKA-XAPMVYOVSA-N	InChI=1S/C27H30O10/c1-12(2)5-10-16-17(28)11-18(29)19-21(31)26(37-27-23(33)22(32)20(30)13(3)35-27)24(36-25(16)19)14-6-8-15(34-4)9-7-14/h5-9,11,13,20,22-23,27-30,32-33H,10H2,1-4H3/t13-,20-,22+,23+,27+/m1/s1	COc1ccc(cc1)c1oc2c(CC=C(C)C)c(O)cc(c2c(=O)c1O[C@@H]1O[C@H](C)[C@H]([C@@H]([C@@H]1O)O)O)O	O76074	1
Alpinumisoflavone	Isoflavones	5-hydroxy-7-(4-hydroxyphenyl)-2,2-dimethylpyrano[3,2-g]chromen-6-one	C20H16O5	RQAMSFTXEFSBPK-UHFFFAOYSA-N	InChI=1S/C20H16O5/c1-20(2)8-7-13-15(25-20)9-16-17(18(13)22)19(23)14(10-24-16)11-3-5-12(21)6-4-11/h3-10,21-22H,1-2H3	Oc1ccc(cc1)c1coc2c(c1=O)c(O)c1c(c2)OC(C=C1)(C)C	P18031	1
5,7-Dihydroxy-2-(2-Hydroxyphenyl)Chromen-4-One	Flavones	5,7-dihydroxy-2-(2-hydroxyphenyl)chromen-4-one	C15H10O5	OFYPDAKTVZXXPC-UHFFFAOYSA-N	InChI=1S/C15H10O5/c16-8-5-11(18)15-12(19)7-13(20-14(15)6-8)9-3-1-2-4-10(9)17/h1-7,16-18H	Oc1cc(O)c2c(c1)oc(cc2=O)c1ccccc1O	P11712,Q03164,P10636,P10635,P33261,P28482,Q9Y3R4	7
Aureusidin-6-O-Beta-D-Glucopyranoside	Others	(2Z)-2-[(3,4-dihydroxyphenyl)methylidene]-4-hydroxy-6-[(2S,3R,4S,5S,6R)-3,4,5-trihydroxy-6-(hydroxymethyl)oxan-2-yl]oxy-1-benzofuran-3-one	C21H20O11	AMJCTDBATIKENQ-YRDFTBLNSA-N	InChI=1S/C21H20O11/c22-7-15-18(27)19(28)20(29)21(32-15)30-9-5-12(25)16-13(6-9)31-14(17(16)26)4-8-1-2-10(23)11(24)3-8/h1-6,15,18-25,27-29H,7H2/b14-4-/t15-,18-,19+,20-,21-/m1/s1	OC[C@H]1O[C@@H](Oc2cc3O/C(=Cc4ccc(c(c4)O)O)/C(=O)c3c(c2)O)[C@@H]([C@H]([C@@H]1O)O)O	Q15078	1
Quercetin Dihydrate	Flavonols	2-(3,4-dihydroxyphenyl)-3,5,7-trihydroxychromen-4-one;hydrate	C15H10O7.H2O	OKXFBEYCJRMINR-UHFFFAOYSA-N	InChI=1S/C15H10O7.H2O/c16-7-4-10(19)12-11(5-7)22-15(14(21)13(12)20)6-1-2-8(17)9(18)3-6;/h1-5,16-19,21H;1H2	Oc1cc(O)c2c(c1)oc(c(c2=O)O)c1ccc(c(c1)O)O.O	P27695,O94782,P30559,P06746,P29372,P39748,O75164,Q13526,Q9UIF8,O75496,P54132,P07711,O95398,Q9Y253,Q96QE3,P21802,P11308,Q14191,Q03164,Q9UBT6,Q03164,Q9UNA4,P10253	23
Rotenone	Others	</td></tr>\r\n\t\t\t\t<tr><td align=right><b>Synonyms: &nbsp</b>	C23H22O6	JUVIOZPCNVVQFO-HBGVWJBISA-N	InChI=1S/C23H22O6/c1-11(2)16-8-14-15(28-16)6-5-12-22(24)21-13-7-18(25-3)19(26-4)9-17(13)27-10-20(21)29-23(12)14/h5-7,9,16,20-21H,1,8,10H2,2-4H3/t16-,20-,21+/m1/s1	COc1cc2c(cc1OC)OC[C@@H]1[C@H]2C(=O)c2c(O1)c1C[C@@H](Oc1cc2)C(=C)C	P51151,P42345,P02545,P19838,P50406,Q9NPD5,Q9Y6L6,P33261,P19793,P03905,P00352,P16473,O75496,Q01453,P37231,Q16236,Q96KQ7,Q03181,Q9NUW8,Q16637,P04150,O15118,P10275,Q99700,P04792,B2RXH2,O94782,P04637,P03372,P46063,Q96QE3,P08684,Q99549	33
Boeravinone	Isoflavones	6,9,11-trihydroxy-10-methyl-6H-chromeno[3,4-b]chromen-12-one	C17H12O6	YVVDYYFGAWQOGB-UHFFFAOYSA-N	InChI=1S/C17H12O6/c1-7-9(18)6-11-13(14(7)19)15(20)12-8-4-2-3-5-10(8)23-17(21)16(12)22-11/h2-6,17-19,21H,1H3	OC1Oc2ccccc2c2c1oc1cc(O)c(c(c1c2=O)O)C	Q9UNQ0	1
(Rac)-Abyssinone Ii	Flavanones	7-hydroxy-2-[4-hydroxy-3-(3-methylbut-2-enyl)phenyl]-2,3-dihydrochromen-4-one	C20H20O4	NLTOTZSPOYWSSP-UHFFFAOYSA-N	InChI=1S/C20H20O4/c1-12(2)3-4-13-9-14(5-8-17(13)22)19-11-18(23)16-7-6-15(21)10-20(16)24-19/h3,5-10,19,21-22H,4,11H2,1-2H3	CC(=CCc1cc(ccc1O)C1CC(=O)c2c(O1)cc(cc2)O)C	P11511	1
Coumestrol	Others	3,9-dihydroxy-[1]benzofuro[3,2-c]chromen-6-one	C15H8O5	ZZIALNLLNHEQPJ-UHFFFAOYSA-N	InChI=1S/C15H8O5/c16-7-1-3-9-11(5-7)19-14-10-4-2-8(17)6-12(10)20-15(18)13(9)14/h1-6,16-17H	Oc1ccc2c(c1)oc(=O)c1c2oc2c1ccc(c2)O	P39748,P63165,P02545,Q9H0H5,Q9Y253,P56937,P10636,Q9NPD5,Q9Y6L6,O75469,O75496,P10828,Q03164,P15428,Q16236,Q03181,Q9NUW8,P10275,P04792,B2RXH2,P10253,P53350,P03372,O94956,P46063,Q92731,Q96QE3,O94925,Q9UBT6	29
5,7-Dihydroxy-2-(4-Hydroxy-3,5-Dimethoxyphenyl)-3-[(2S,3R,4S,5S,6R)-3,4,5-Trihydroxy-6-(Hydroxymethyl)Oxan-2-Yl]Oxychromen-4-One	Flavonols	5,7-dihydroxy-2-(4-hydroxy-3,5-dimethoxyphenyl)-3-[(2S,3R,4S,5S,6R)-3,4,5-trihydroxy-6-(hydroxymethyl)oxan-2-yl]oxychromen-4-one	C23H24O13	JMFWYRWPJVEZPV-AVGVHVDKSA-N	InChI=1S/C23H24O13/c1-32-12-3-8(4-13(33-2)16(12)27)21-22(18(29)15-10(26)5-9(25)6-11(15)34-21)36-23-20(31)19(30)17(28)14(7-24)35-23/h3-6,14,17,19-20,23-28,30-31H,7H2,1-2H3/t14-,17-,19+,20-,23+/m1/s1	OC[C@H]1O[C@@H](Oc2c(oc3c(c2=O)c(O)cc(c3)O)c2cc(OC)c(c(c2)OC)O)[C@@H]([C@H]([C@@H]1O)O)O	P27695,Q03164	2
Genkwanin	Flavones	5-hydroxy-2-(4-hydroxyphenyl)-7-methoxychromen-4-one	C16H12O5	JPMYFOBNRRGFNO-UHFFFAOYSA-N	InChI=1S/C16H12O5/c1-20-11-6-12(18)16-13(19)8-14(21-15(16)7-11)9-2-4-10(17)5-3-9/h2-8,17-18H,1H3	COc1cc(O)c2c(c1)oc(cc2=O)c1ccc(cc1)O	Q9NPD5,Q9Y6L6,P04745,P04798,Q9Y3R4	5
Abyssinin I	Flavanones	5,7-dihydroxy-2-(8-methoxy-2,2-dimethylchromen-6-yl)-2,3-dihydrochromen-4-one	C21H20O6	SDUMAACMVUGGAC-UHFFFAOYSA-N	InChI=1S/C21H20O6/c1-21(2)5-4-11-6-12(7-18(25-3)20(11)27-21)16-10-15(24)19-14(23)8-13(22)9-17(19)26-16/h4-9,16,22-23H,10H2,1-3H3	COc1cc(cc2c1OC(C)(C)C=C2)C1CC(=O)c2c(O1)cc(cc2O)O	P18031	1
Apigenin	Flavones	5,7-dihydroxy-2-(4-hydroxyphenyl)chromen-4-one	C15H10O5	KZNIFHPLKGYRTM-UHFFFAOYSA-N	InChI=1S/C15H10O5/c16-9-3-1-8(2-4-9)13-7-12(19)15-11(18)5-10(17)6-14(15)20-13/h1-7,16-18H	Oc1ccc(cc1)c1cc(=O)c2c(o1)cc(cc2O)O	P49841,P47989,P31749,P48729,P24941,P39748,P16050,O00141,P02545,P54646,Q07869,Q13526,Q99714,P49137,P49841,P28482,Q9H2K2,P10636,P05412,P19838,P35503,Q9HAW9,Q9NPD5,Q9Y6L6,P06276,P33261,Q16665,Q9Y4K4,P11511,P00352,Q16445,Q16539,P16473,O95067,P68400,Q01453,P11388,P09769,P37231,P49798,P10828,P03372,O75874,Q03164,P15428,P05177,O76074,Q16236,P56817,P33527,Q03181,P35354,Q16637,Q9NUW8,Q16769,P27338,P36888,…	99
7-O-Methylluteone	Isoflavones	3-(2,4-dihydroxyphenyl)-5-hydroxy-7-methoxy-6-(3-methylbut-2-enyl)chromen-4-one	C21H20O6	AZPLXDBZIQMMMT-UHFFFAOYSA-N	InChI=1S/C21H20O6/c1-11(2)4-6-14-17(26-3)9-18-19(20(14)24)21(25)15(10-27-18)13-7-5-12(22)8-16(13)23/h4-5,7-10,22-24H,6H2,1-3H3	COc1cc2occ(c(=O)c2c(c1CC=C(C)C)O)c1ccc(cc1O)O	P22303	1
Hesperidin	Flavanones	(2S)-5-hydroxy-2-(3-hydroxy-4-methoxyphenyl)-7-[(2S,3R,4S,5S,6R)-3,4,5-trihydroxy-6-[[(2R,3R,4R,5R,6S)-3,4,5-trihydroxy-6-methyloxan-2-yl]oxymethyl]oxan-2-yl]oxy-2,3-dihydrochromen-4-one	C28H34O15	QUQPHWDTPGMPEX-QJBIFVCTSA-N	InChI=1S/C28H34O15/c1-10-21(32)23(34)25(36)27(40-10)39-9-19-22(33)24(35)26(37)28(43-19)41-12-6-14(30)20-15(31)8-17(42-18(20)7-12)11-3-4-16(38-2)13(29)5-11/h3-7,10,17,19,21-30,32-37H,8-9H2,1-2H3/t10-,17-,19+,21-,22+,23+,24-,25+,26+,27+,28+/m0/s1	COc1ccc(cc1O)[C@@H]1CC(=O)c2c(O1)cc(cc2O)O[C@@H]1O[C@H](CO[C@@H]2O[C@@H](C)[C@@H]([C@H]([C@H]2O)O)O)[C@H]([C@@H]([C@H]1O)O)O	Q02410,Q9NPD5,P06746,Q9Y6L6,O75164,Q9UIF8,Q9Y253,O94925,Q9Y251,Q9GZU7,P62158	11
Quercitrin	Flavonols	2-(3,4-dihydroxyphenyl)-5,7-dihydroxy-3-[(2S,3R,4R,5R,6S)-3,4,5-trihydroxy-6-methyloxan-2-yl]oxychromen-4-one	C21H20O11	OXGUCUVFOIWWQJ-HQBVPOQASA-N	InChI=1S/C21H20O11/c1-7-15(26)17(28)18(29)21(30-7)32-20-16(27)14-12(25)5-9(22)6-13(14)31-19(20)8-2-3-10(23)11(24)4-8/h2-7,15,17-18,21-26,28-29H,1H3/t7-,15-,17+,18+,21-/m0/s1	Oc1cc(O)c2c(c1)oc(c(c2=O)O[C@@H]1O[C@@H](C)[C@@H]([C@H]([C@H]1O)O)O)c1ccc(c(c1)O)O	P15121,Q9NPD5,Q9Y6L6,P47989,P39748,O75164,Q9Y468,P18031,Q9UBT6,Q9P1W9,P07237,Q9UNA4	12
Amurensin	Flavonols	3,5-dihydroxy-8-(3-hydroxy-3-methylbutyl)-2-(4-hydroxyphenyl)-7-[(2S,3R,4S,5S,6R)-3,4,5-trihydroxy-6-(hydroxymethyl)oxan-2-yl]oxychromen-4-one	C26H30O12	UNHHWEHQUUGKEE-MLLLWRCASA-N	InChI=1S/C26H30O12/c1-26(2,35)8-7-13-15(36-25-22(34)20(32)18(30)16(10-27)37-25)9-14(29)17-19(31)21(33)23(38-24(13)17)11-3-5-12(28)6-4-11/h3-6,9,16,18,20,22,25,27-30,32-35H,7-8,10H2,1-2H3/t16-,18-,20+,22-,25-/m1/s1	OC[C@H]1O[C@@H](Oc2cc(O)c3c(c2CCC(O)(C)C)oc(c(c3=O)O)c2ccc(cc2)O)[C@@H]([C@H]([C@@H]1O)O)O	P14679	1
Myricetin-3-O-Beta-D-Glucuronide	Flavonols	(2S,3S,4S,5R,6S)-6-[5,7-dihydroxy-4-oxo-2-(3,4,5-trihydroxyphenyl)chromen-3-yl]oxy-3,4,5-trihydroxyoxane-2-carboxylic acid	C21H18O14	MBWOCQLTCWTIJE-ZUGPOPFOSA-N	InChI=1S/C21H18O14/c22-6-3-7(23)11-10(4-6)33-17(5-1-8(24)12(26)9(25)2-5)18(13(11)27)34-21-16(30)14(28)15(29)19(35-21)20(31)32/h1-4,14-16,19,21-26,28-30H,(H,31,32)/t14-,15-,16+,19-,21+/m0/s1	Oc1cc(O)c2c(c1)oc(c(c2=O)O[C@@H]1O[C@H](C(=O)O)[C@H]([C@@H]([C@H]1O)O)O)c1cc(O)c(c(c1)O)O	P35354,P23219	2

## Sheet: 481 targets
uniprot ID	Gene ID	Gene Symbol	Description
Q9HAW9	54576	UGT1A8	UDP glucuronosyltransferase family 1 member A8
P24298	2875	GPT	glutamic--pyruvic transaminase
P06239	3932	LCK	LCK proto-oncogene, Src family tyrosine kinase
Q15746	4638	MYLK	myosin light chain kinase
Q9Y253	5429	POLH	DNA polymerase eta
Q8IW41	8550	MAPKAPK5	mitogen-activated protein kinase-activated protein kinase 5
Q02410	320	APBA1	amyloid beta precursor protein binding family A member 1
O00748	8824	CES2	carboxylesterase 2
P51679	1233	CCR4	C-C motif chemokine receptor 4
P14151	6402	SELL	selectin L
Q96S37	116085	SLC22A12	solute carrier family 22 member 12
P51843	190	NR0B1	nuclear receptor subfamily 0 group B member 1
Q8N5S9	84254	CAMKK1	calcium/calmodulin dependent protein kinase kinase 1
O15530	5170	PDPK1	3-phosphoinositide dependent protein kinase 1
O14746	7015	TERT	telomerase reverse transcriptase
P00915	759	CA1	carbonic anhydrase 1
Q00796	6652	SORD	sorbitol dehydrogenase
P51151	9367	RAB9A	RAB9A, member RAS oncogene family
Q03164	4297	KMT2A	lysine methyltransferase 2A
P51449	6097	RORC	RAR related orphan receptor C
Q14191	7486	WRN	Werner syndrome RecQ like helicase
Q13315	472	ATM	ATM serine/threonine kinase
Q16665	3091	HIF1A	hypoxia inducible factor 1 alpha subunit
P31941	200315	APOBEC3A	apolipoprotein B mRNA editing enzyme catalytic subunit 3A
Q96DB2	79885	HDAC11	histone deacetylase 11
P08913	150	ADRA2A	adrenoceptor alpha 2A
P06746	5423	POLB	DNA polymerase beta
P33527	4363	ABCC1	ATP binding cassette subfamily C member 1
P49137	9261	MAPKAPK2	mitogen-activated protein kinase-activated protein kinase 2
Q6W5P4	387129	NPSR1	neuropeptide S receptor 1
P10696	251	ALPPL2	alkaline phosphatase, placental like 2
P34949	4351	MPI	mannose phosphate isomerase
Q14469	3280	HES1	hes family bHLH transcription factor 1
O60656	54600	UGT1A9	UDP glucuronosyltransferase family 1 member A9
Q9Y4X1	10941	UGT2A1	UDP glucuronosyltransferase family 2 member A1 complex locus
P09923	248	ALPI	alkaline phosphatase, intestinal
O75164	9682	KDM4A	lysine demethylase 4A
Q9BUF5	84617	TUBB6	tubulin beta 6 class V
P15692	7422	VEGFA	vascular endothelial growth factor A
P08253	4313	MMP2	matrix metallopeptidase 2
Q16566	814	CAMK4	calcium/calmodulin dependent protein kinase IV
P49760	1196	CLK2	CDC like kinase 2
P18054	239	ALOX12	arachidonate 12-lipoxygenase, 12S type
Q8WZA2	11069	RAPGEF4	Rap guanine nucleotide exchange factor 4
O14976	2580	GAK	cyclin G associated kinase
Q92831	8850	KAT2B	lysine acetyltransferase 2B
P01375	7124	TNF	tumor necrosis factor
O00487	10213	PSMD14	proteasome 26S subunit, non-ATPase 14
P54855	7366	UGT2B15	UDP glucuronosyltransferase family 2 member B15
P20794	4117	MAK	male germ cell associated kinase
P08238	3326	HSP90AB1	heat shock protein 90 alpha family class B member 1
Q16445	2559	GABRA6	gamma-aminobutyric acid type A receptor alpha6 subunit
P23219	5742	PTGS1	prostaglandin-endoperoxide synthase 1
P08865	3921	RPSA	ribosomal protein SA
P13866	6523	SLC5A1	solute carrier family 5 member 1
P27338	4129	MAOB	monoamine oxidase B
Q13188	6788	STK3	serine/threonine kinase 3
Q99714	3028	HSD17B10	hydroxysteroid 17-beta dehydrogenase 10
P05067	351	APP	amyloid beta precursor protein
O14965	6790	AURKA	aurora kinase A
P54646	5563	PRKAA2	protein kinase AMP-activated catalytic subunit alpha 2
P09237	4316	MMP7	matrix metallopeptidase 7
O15075	9201	DCLK1	doublecortin like kinase 1
P06493	983	CDK1	cyclin dependent kinase 1
P09884	5422	POLA1	DNA polymerase alpha 1, catalytic subunit
Q13164	5598	MAPK7	mitogen-activated protein kinase 7
Q03181	5467	PPARD	peroxisome proliferator activated receptor delta
P49759	1195	CLK1	CDC like kinase 1
P04278	6462	SHBG	sex hormone binding globulin
P10275	367	AR	androgen receptor
P22303	43	ACHE	acetylcholinesterase (Cartwright blood group)
Q15078	8851	CDK5R1	cyclin dependent kinase 5 regulatory subunit 1
P49862	5650	KLK7	kallikrein related peptidase 7
P10635	1565	CYP2D6	cytochrome P450 family 2 subfamily D member 6
P43250	2870	GRK6	G protein-coupled receptor kinase 6
Q13627	1859	DYRK1A	dual specificity tyrosine phosphorylation regulated kinase 1A
Q13705	93	ACVR2B	activin A receptor type 2B
P08069	3480	IGF1R	insulin like growth factor 1 receptor
P08908	3350	HTR1A	5-hydroxytryptamine receptor 1A
P15144	290	ANPEP	alanyl aminopeptidase, membrane
P14679	7299	TYR	tyrosinase
Q9H3R0	23081	KDM4C	lysine demethylase 4C
Q02779	4294	MAP3K10	mitogen-activated protein kinase kinase kinase 10
P30530	558	AXL	AXL receptor tyrosine kinase
P62158		None	None
O00444	10733	PLK4	polo like kinase 4
Q86V86	415116	PIM3	Pim-3 proto-oncogene, serine/threonine kinase
Q99549	54737	MPHOSPH8	M-phase phosphoprotein 8
Q12866	10461	MERTK	MER proto-oncogene, tyrosine kinase
P29274	135	ADORA2A	adenosine A2a receptor
P18825	152	ADRA2C	adrenoceptor alpha 2C
Q16678	1545	CYP1B1	cytochrome P450 family 1 subfamily B member 1
P16083	4835	NQO2	N-ribosyldihydronicotinamide:quinone reductase 2
P17948	2321	FLT1	fms related tyrosine kinase 1
Q9P1W9	11040	PIM2	Pim-2 proto-oncogene, serine/threonine kinase
P35372	4988	OPRM1	opioid receptor mu 1
P14635	891	CCNB1	cyclin B1
O95398	10411	RAPGEF3	Rap guanine nucleotide exchange factor 3
P0DMS8	140	ADORA3	adenosine A3 receptor
Q96KQ7	10919	EHMT2	euchromatic histone lysine methyltransferase 2
Q99685	11343	MGLL	monoglyceride lipase
Q9UNA4	11201	POLI	DNA polymerase iota
Q96GD4	9212	AURKB	aurora kinase B
P29350	5777	PTPN6	protein tyrosine phosphatase, non-receptor type 6
P84022	4088	SMAD3	SMAD family member 3
Q9Y6L6	10599	SLCO1B1	solute carrier organic anion transporter family member 1B1
P04626	2064	ERBB2	erb-b2 receptor tyrosine kinase 2
P37840	6622	SNCA	synuclein alpha
P00519	25	ABL1	ABL proto-oncogene 1, non-receptor tyrosine kinase
P14780	4318	MMP9	matrix metallopeptidase 9
Q06187	695	BTK	Bruton tyrosine kinase
P42345	2475	MTOR	mechanistic target of rapamycin kinase
Q13148	23435	TARDBP	TAR DNA binding protein
P18433	5786	PTPRA	protein tyrosine phosphatase, receptor type A
P68400	1457	CSNK2A1	casein kinase 2 alpha 1
P50750	1025	CDK9	cyclin dependent kinase 9
O00337	9154	SLC28A1	solute carrier family 28 member 1
P80404	18	ABAT	4-aminobutyrate aminotransferase
P21554	1268	CNR1	cannabinoid receptor 1
Q9UIF8	29994	BAZ2B	bromodomain adjacent to zinc finger domain 2B
P43166	766	CA7	carbonic anhydrase 7
Q13332	5802	PTPRS	protein tyrosine phosphatase, receptor type S
P50406	3362	HTR6	5-hydroxytryptamine receptor 6
Q2M2I8	22848	AAK1	AP2 associated kinase 1
P10636	4137	MAPT	microtubule associated protein tau
P48147	5550	PREP	prolyl endopeptidase
P42858	3064	HTT	huntingtin
P78536	6868	ADAM17	ADAM metallopeptidase domain 17
P54756	2044	EPHA5	EPH receptor A5
P11926	4953	ODC1	ornithine decarboxylase 1
P49763	5228	PGF	placental growth factor
P07900	3320	HSP90AA1	heat shock protein 90 alpha family class A member 1
P40763	6774	STAT3	signal transducer and activator of transcription 3
P23141	1066	CES1	carboxylesterase 1
P02545	4000	LMNA	lamin A/C
P09874	142	PARP1	poly(ADP-ribose) polymerase 1
Q8IUX4	200316	APOBEC3F	apolipoprotein B mRNA editing enzyme catalytic subunit 3F
Q92731	2100	ESR2	estrogen receptor 2
P24666	52	ACP1	acid phosphatase 1
P16473	7253	TSHR	thyroid stimulating hormone receptor
Q13131	5562	PRKAA1	protein kinase AMP-activated catalytic subunit alpha 1
P53778	6300	MAPK12	mitogen-activated protein kinase 12
O43868	9153	SLC28A2	solute carrier family 28 member 2
P01215	1081	CGA	glycoprotein hormones, alpha polypeptide
P27487	1803	DPP4	dipeptidyl peptidase 4
O60285	9891	NUAK1	NUAK family kinase 1
P09917	240	ALOX5	arachidonate 5-lipoxygenase
P43220	2740	GLP1R	glucagon like peptide 1 receptor
P21397	4128	MAOA	monoamine oxidase A
P23467	5787	PTPRB	protein tyrosine phosphatase, receptor type B
Q9Y468	26013	L3MBTL1	L3MBTL1, histone methyl-lysine binding protein
P36888	2322	FLT3	fms related tyrosine kinase 3
P05186	249	ALPL	alkaline phosphatase, liver/bone/kidney
P16109	6403	SELP	selectin P
P04062	2629	GBA	glucosylceramidase beta
P15559	1728	NQO1	NAD(P)H quinone dehydrogenase 1
Q9NPD5	28234	SLCO1B3	solute carrier organic anion transporter family member 1B3
P78396	8900	CCNA1	cyclin A1
P11217	5837	PYGM	glycogen phosphorylase, muscle associated
P49327	2194	FASN	fatty acid synthase
P17706	5771	PTPN2	protein tyrosine phosphatase, non-receptor type 2
Q9H2K8	51347	TAOK3	TAO kinase 3
P03372	2099	ESR1	estrogen receptor 1
P07947	7525	YES1	YES proto-oncogene 1, Src family tyrosine kinase
Q05397	5747	PTK2	protein tyrosine kinase 2
Q9NR56	4154	MBNL1	muscleblind like splicing regulator 1
P41240	1445	CSK	C-terminal Src kinase
Q9Y2D0	11238	CA5B	carbonic anhydrase 5B
P31749	207	AKT1	AKT serine/threonine kinase 1
P60568	3558	IL2	interleukin 2
Q15118	5163	PDK1	pyruvate dehydrogenase kinase 1
P09769	2268	FGR	FGR proto-oncogene, Src family tyrosine kinase
P51589	1573	CYP2J2	cytochrome P450 family 2 subfamily J member 2
P37058	3293	HSD17B3	hydroxysteroid 17-beta dehydrogenase 3
P11387	7150	TOP1	DNA topoisomerase I
O15111	1147	CHUK	conserved helix-loop-helix ubiquitous kinase
P07998	6035	RNASE1	ribonuclease A family member 1, pancreatic
P04406	2597	GAPDH	glyceraldehyde-3-phosphate dehydrogenase
Q13554	816	CAMK2B	calcium/calmodulin dependent protein kinase II beta
P10253	2548	GAA	glucosidase alpha, acid
P26358	1786	DNMT1	DNA methyltransferase 1
P03956	4312	MMP1	matrix metallopeptidase 1
Q9UBT6	51426	POLK	DNA polymerase kappa
P24941	1017	CDK2	cyclin dependent kinase 2
P00749	5328	PLAU	plasminogen activator, urokinase
Q00526	1018	CDK3	cyclin dependent kinase 3
P55055	7376	NR1H2	nuclear receptor subfamily 1 group H member 2
P78527	5591	PRKDC	protein kinase, DNA-activated, catalytic polypeptide
P28907	952	CD38	CD38 molecule
P16050	246	ALOX15	arachidonate 15-lipoxygenase
Q9H2K2	80351	TNKS2	tankyrase 2
O15118	4864	NPC1	NPC intracellular cholesterol transporter 1
P51452	1845	DUSP3	dual specificity phosphatase 3
P22612	5568	PRKACG	protein kinase cAMP-activated catalytic subunit gamma
Q8WTQ7	131890	GRK7	G protein-coupled receptor kinase 7
Q969S8	83933	HDAC10	histone deacetylase 10
P55789	2671	GFER	growth factor, augmenter of liver regeneration
P14410	6476	SI	sucrase-isomaltase
P37059	3294	HSD17B2	hydroxysteroid 17-beta dehydrogenase 2
Q07869	5465	PPARA	peroxisome proliferator activated receptor alpha
P08246	1991	ELANE	elastase, neutrophil expressed
Q9H2X6	28996	HIPK2	homeodomain interacting protein kinase 2
P08684	1576	CYP3A4	cytochrome P450 family 3 subfamily A member 4
P04745	276	AMY1A	amylase, alpha 1A (salivary)
Q9UHD2	29110	TBK1	TANK binding kinase 1
P53779	5602	MAPK10	mitogen-activated protein kinase 10
P39748	2237	FEN1	flap structure-specific endonuclease 1
Q9HAS3	64078	SLC28A3	solute carrier family 28 member 3
P80192	4293	MAP3K9	mitogen-activated protein kinase kinase kinase 9
P17252	5578	PRKCA	protein kinase C alpha
Q16620	4915	NTRK2	neurotrophic receptor tyrosine kinase 2
O75604	9099	USP2	ubiquitin specific peptidase 2
P52209	5226	PGD	phosphogluconate dehydrogenase
P48736	5294	PIK3CG	phosphatidylinositol-4,5-bisphosphate 3-kinase catalytic subunit gamma
Q12851	5871	MAP4K2	mitogen-activated protein kinase kinase kinase kinase 2
O00167	2139	EYA2	EYA transcriptional coactivator and phosphatase 2
O75908	8435	SOAT2	sterol O-acyltransferase 2
Q9H422	10114	HIPK3	homeodomain interacting protein kinase 3
P27695	328	APEX1	apurinic/apyrimidinic endodeoxyribonuclease 1
P21728	1812	DRD1	dopamine receptor D1
P18507	2566	GABRG2	gamma-aminobutyric acid type A receptor gamma2 subunit
Q9GZQ4	56923	NMUR2	neuromedin U receptor 2
P21802	2263	FGFR2	fibroblast growth factor receptor 2
Q9HAW7	54577	UGT1A7	UDP glucuronosyltransferase family 1 member A7
P11388	7153	TOP2A	DNA topoisomerase II alpha
O75582	9252	RPS6KA5	ribosomal protein S6 kinase A5
O14684	9536	PTGES	prostaglandin E synthase
P63092	2778	GNAS	GNAS complex locus
Q12809	3757	KCNH2	potassium voltage-gated channel subfamily H member 2
P19793	6256	RXRA	retinoid X receptor alpha
Q16769	25797	QPCT	glutaminyl-peptide cyclotransferase
Q02880	7155	TOP2B	DNA topoisomerase II beta
P07237	5034	P4HB	prolyl 4-hydroxylase subunit beta
P33261	1557	CYP2C19	cytochrome P450 family 2 subfamily C member 19
Q01453	5376	PMP22	peripheral myelin protein 22
P14735	3416	IDE	insulin degrading enzyme
O15438	8714	ABCC3	ATP binding cassette subfamily C member 3
Q03431	5745	PTH1R	parathyroid hormone 1 receptor
P42685	2444	FRK	fyn related Src family tyrosine kinase
O75874	3417	IDH1	isocitrate dehydrogenase (NADP(+)) 1, cytosolic
Q8WXD0	122042	RXFP2	relaxin family peptide receptor 2
Q04760	2739	GLO1	glyoxalase I
Q99759	4215	MAP3K3	mitogen-activated protein kinase kinase kinase 3
Q9ULX7	23632	CA14	carbonic anhydrase 14
Q59H18	51086	TNNI3K	TNNI3 interacting kinase
P04798	1543	CYP1A1	cytochrome P450 family 1 subfamily A member 1
P20813	1555	CYP2B6	cytochrome P450 family 2 subfamily B member 6
O95067	9133	CCNB2	cyclin B2
O94782	7398	USP1	ubiquitin specific peptidase 1
P28845	3290	HSD11B1	hydroxysteroid 11-beta dehydrogenase 1
Q00535	1020	CDK5	cyclin dependent kinase 5
P06737	5836	PYGL	glycogen phosphorylase L
Q9GZU7	58190	CTDSP1	CTD small phosphatase 1
Q16790	768	CA9	carbonic anhydrase 9
Q9HC97	2859	GPR35	G protein-coupled receptor 35
P41145	4986	OPRK1	opioid receptor kappa 1
O00141	6446	SGK1	serum/glucocorticoid regulated kinase 1
P00352	216	ALDH1A1	aldehyde dehydrogenase 1 family member A1
P04040	847	CAT	catalase
Q00613	3297	HSF1	heat shock transcription factor 1
P39900	4321	MMP12	matrix metallopeptidase 12
Q92887	1244	ABCC2	ATP binding cassette subfamily C member 2
P25024	3577	CXCR1	C-X-C motif chemokine receptor 1
P42224	6772	STAT1	signal transducer and activator of transcription 1
O95342	8647	ABCB11	ATP binding cassette subfamily B member 11
P54132	641	BLM	Bloom syndrome RecQ like helicase
P11309	5292	PIM1	Pim-1 proto-oncogene, serine/threonine kinase
Q96RI1	9971	NR1H4	nuclear receptor subfamily 1 group H member 4
Q96P20	114548	NLRP3	NLR family pyrin domain containing 3
Q9P0U3	29843	SENP1	SUMO specific peptidase 1
O15379	8841	HDAC3	histone deacetylase 3
O76039	6792	CDKL5	cyclin dependent kinase like 5
P06276	590	BCHE	butyrylcholinesterase
P00533	1956	EGFR	epidermal growth factor receptor
Q08881	3702	ITK	IL2 inducible T cell kinase
P23443	6198	RPS6KB1	ribosomal protein S6 kinase B1
Q16236	4780	NFE2L2	nuclear factor, erythroid 2 like 2
Q9HBX9	59350	RXFP1	relaxin family peptide receptor 1
Q9NY91	6527	SLC5A4	solute carrier family 5 member 4
P51617	3654	IRAK1	interleukin 1 receptor associated kinase 1
Q07820	4170	MCL1	MCL1, BCL2 family apoptosis regulator
P02766	7276	TTR	transthyretin
Q99700	6311	ATXN2	ataxin 2
P55072	7415	VCP	valosin containing protein
P47989	7498	XDH	xanthine dehydrogenase
Q9NPH5	50507	NOX4	NADPH oxidase 4
Q9HC98	10783	NEK6	NIMA related kinase 6
P34969	3363	HTR7	5-hydroxytryptamine receptor 7
P37173	7048	TGFBR2	transforming growth factor beta receptor 2
P16220	1385	CREB1	cAMP responsive element binding protein 1
P61088	7334	UBE2N	ubiquitin conjugating enzyme E2 N
O15264	5603	MAPK13	mitogen-activated protein kinase 13
P00390	2936	GSR	glutathione-disulfide reductase
O14757	1111	CHEK1	checkpoint kinase 1
P19784	1459	CSNK2A2	casein kinase 2 alpha 2
Q15418	6195	RPS6KA1	ribosomal protein S6 kinase A1
P12931	6714	SRC	SRC proto-oncogene, non-receptor tyrosine kinase
Q9UBN7	10013	HDAC6	histone deacetylase 6
P15289	410	ARSA	arylsulfatase A
Q92830	2648	KAT2A	lysine acetyltransferase 2A
Q9UEE5	9263	STK17A	serine/threonine kinase 17a
Q9UQM7	815	CAMK2A	calcium/calmodulin dependent protein kinase II alpha
Q9H0H5	29127	RACGAP1	Rac GTPase activating protein 1
Q04759	5588	PRKCQ	protein kinase C theta
Q13951	865	CBFB	core-binding factor beta subunit
P05771	5579	PRKCB	protein kinase C beta
P05164	4353	MPO	myeloperoxidase
Q9UNQ0	9429	ABCG2	ATP binding cassette subfamily G member 2 (Junior blood group)
B2RXH2	390245	KDM4E	lysine demethylase 4E
P55210	840	CASP7	caspase 7
Q5VT25	8476	CDC42BPA	CDC42 binding protein kinase alpha
Q9NUW8	55775	TDP1	tyrosyl-DNA phosphodiesterase 1
P00918	760	CA2	carbonic anhydrase 2
P35218	763	CA5A	carbonic anhydrase 5A
P06280	2717	GLA	galactosidase alpha
P11511	1588	CYP19A1	cytochrome P450 family 19 subfamily A member 1
Q9Y2U5	10746	MAP3K2	mitogen-activated protein kinase kinase kinase 2
Q92769	3066	HDAC2	histone deacetylase 2
P30989	4923	NTSR1	neurotensin receptor 1
Q9BYT3	65975	STK33	serine/threonine kinase 33
O95271	8658	TNKS	tankyrase
P11802	1019	CDK4	cyclin dependent kinase 4
Q9UL54	9344	TAOK2	TAO kinase 2
P83916	10951	CBX1	chromobox 1
P07711	1514	CTSL	cathepsin L
P43235	1513	CTSK	cathepsin K
Q7L7X3	57551	TAOK1	TAO kinase 1
O14763	8795	TNFRSF10B	TNF receptor superfamily member 10b
P03905	4538	ND4	NADH dehydrogenase, subunit 4 (complex I)
P22310	54657	UGT1A4	UDP glucuronosyltransferase family 1 member A4
P04637	7157	TP53	tumor protein p53
P50281	4323	MMP14	matrix metallopeptidase 14
P21860	2065	ERBB3	erb-b2 receptor tyrosine kinase 3
P28482	5594	MAPK1	mitogen-activated protein kinase 1
P10415	596	BCL2	BCL2, apoptosis regulator
O75496	51053	GMNN	geminin, DNA replication inhibitor
Q99816	7251	TSG101	tumor susceptibility 101
Q07817	598	BCL2L1	BCL2 like 1
P15121	231	AKR1B1	aldo-keto reductase family 1 member B
Q9HC16	60489	APOBEC3G	apolipoprotein B mRNA editing enzyme catalytic subunit 3G
P43405	6850	SYK	spleen associated tyrosine kinase
P11712	1559	CYP2C9	cytochrome P450 family 2 subfamily C member 9
Q96RR4	10645	CAMKK2	calcium/calmodulin dependent protein kinase kinase 2
P19174	5335	PLCG1	phospholipase C gamma 1
O76074	8654	PDE5A	phosphodiesterase 5A
P08254	4314	MMP3	matrix metallopeptidase 3
P02768	213	ALB	albumin
Q13547	3065	HDAC1	histone deacetylase 1
P06213	3643	INSR	insulin receptor
P00747	5340	PLG	plasminogen
P19838	4790	NFKB1	nuclear factor kappa B subunit 1
P51160	5146	PDE6C	phosphodiesterase 6C
Q13526	5300	PIN1	peptidylprolyl cis/trans isomerase, NIMA-interacting 1
Q15759	5600	MAPK11	mitogen-activated protein kinase 11
P11166	6513	SLC2A1	solute carrier family 2 member 1
P49841	2932	GSK3B	glycogen synthase kinase 3 beta
Q16875	5209	PFKFB3	6-phosphofructo-2-kinase/fructose-2,6-biphosphatase 3
P00374	1719	DHFR	dihydrofolate reductase
Q9BQI3	27102	EIF2AK1	eukaryotic translation initiation factor 2 alpha kinase 1
P22309	54658	UGT1A1	UDP glucuronosyltransferase family 1 member A1
Q08499	5144	PDE4D	phosphodiesterase 4D
P35030	5646	PRSS3	serine protease 3
P45452	4322	MMP13	matrix metallopeptidase 13
P04792	3315	HSPB1	heat shock protein family B (small) member 1
P11473	7421	VDR	vitamin D receptor
Q9Y4K4	11183	MAP4K5	mitogen-activated protein kinase kinase kinase kinase 5
Q9Y3R4	4759	NEU2	neuraminidase 2
P41143	4985	OPRD1	opioid receptor delta 1
P11308	2078	ERG	ERG, ETS transcription factor
Q15349	6196	RPS6KA2	ribosomal protein S6 kinase A2
P35968	3791	KDR	kinase insert domain receptor
P45984	5601	MAPK9	mitogen-activated protein kinase 9
Q9HAW8	54575	UGT1A10	UDP glucuronosyltransferase family 1 member A10
Q99808	2030	SLC29A1	solute carrier family 29 member 1 (Augustine blood group)
P35354	5743	PTGS2	prostaglandin-endoperoxide synthase 2
Q9HBH9	2872	MKNK2	MAP kinase interacting serine/threonine kinase 2
Q02156	5581	PRKCE	protein kinase C epsilon
P14174	4282	MIF	macrophage migration inhibitory factor
P11021	3309	HSPA5	heat shock protein family A (Hsp70) member 5
O43570	771	CA12	carbonic anhydrase 12
P34913	2053	EPHX2	epoxide hydrolase 2
P53355	1612	DAPK1	death associated protein kinase 1
O60218	57016	AKR1B10	aldo-keto reductase family 1 member B10
Q13133	10062	NR1H3	nuclear receptor subfamily 1 group H member 3
Q16637	6606	SMN1	survival of motor neuron 1, telomeric
P14555	5320	PLA2G2A	phospholipase A2 group IIA
P45983	5599	MAPK8	mitogen-activated protein kinase 8
O75469	8856	NR1I2	nuclear receptor subfamily 1 group I member 2
Q16539	1432	MAPK14	mitogen-activated protein kinase 14
Q9UM73	238	ALK	ALK receptor tyrosine kinase
Q92918	11184	MAP4K1	mitogen-activated protein kinase kinase kinase kinase 1
P04054	5319	PLA2G1B	phospholipase A2 group IB
P07550	154	ADRB2	adrenoceptor beta 2
P30518	554	AVPR2	arginine vasopressin receptor 2
P08183	5243	ABCB1	ATP binding cassette subfamily B member 1
P29317	1969	EPHA2	EPH receptor A2
P48729	1452	CSNK1A1	casein kinase 1 alpha 1
P35869	196	AHR	aryl hydrocarbon receptor
P05177	1544	CYP1A2	cytochrome P450 family 1 subfamily A member 2
Q07343	5142	PDE4B	phosphodiesterase 4B
Q9Y251	10855	HPSE	heparanase
Q09472	2033	EP300	E1A binding protein p300
P11362	2260	FGFR1	fibroblast growth factor receptor 1
P14061	3292	HSD17B1	hydroxysteroid 17-beta dehydrogenase 1
Q8IVH8	8491	MAP4K3	mitogen-activated protein kinase kinase kinase kinase 3
P56937	51478	HSD17B7	hydroxysteroid 17-beta dehydrogenase 7
P37231	5468	PPARG	peroxisome proliferator activated receptor gamma
Q9BY41	55869	HDAC8	histone deacetylase 8
P24723	5583	PRKCH	protein kinase C eta
O94768	9262	STK17B	serine/threonine kinase 17b
O14920	3551	IKBKB	inhibitor of nuclear factor kappa B kinase subunit beta
O15296	247	ALOX15B	arachidonate 15-lipoxygenase, type B
P05121	5054	SERPINE1	serpin family E member 1
P51649	7915	ALDH5A1	aldehyde dehydrogenase 5 family member A1
P35610	6646	SOAT1	sterol O-acyltransferase 1
P22748	762	CA4	carbonic anhydrase 4
P14618	5315	PKM	pyruvate kinase M1/2
P00734	2147	F2	coagulation factor II, thrombin
Q96QE3	79915	ATAD5	ATPase family, AAA domain containing 5
P23280	765	CA6	carbonic anhydrase 6
Q9UK32	27330	RPS6KA6	ribosomal protein S6 kinase A6
P38398	672	BRCA1	BRCA1, DNA repair associated
P56817	23621	BACE1	beta-secretase 1
Q02750	5604	MAP2K1	mitogen-activated protein kinase kinase 1
P11474	2101	ESRRA	estrogen related receptor alpha
P68871	3043	HBB	hemoglobin subunit beta
P05091	217	ALDH2	aldehyde dehydrogenase 2 family member
O94925	2744	GLS	glutaminase
Q00534	1021	CDK6	cyclin dependent kinase 6
P24385	595	CCND1	cyclin D1
O76083	5152	PDE9A	phosphodiesterase 9A
P49336	1024	CDK8	cyclin dependent kinase 8
P51955	4751	NEK2	NIMA related kinase 2
P28335	3358	HTR2C	5-hydroxytryptamine receptor 2C
P55212	839	CASP6	caspase 6
Q9NWT6	55662	HIF1AN	hypoxia inducible factor 1 alpha subunit inhibitor
P63165	7341	SUMO1	small ubiquitin-like modifier 1
P10145	3576	CXCL8	C-X-C motif chemokine ligand 8
P07451	761	CA3	carbonic anhydrase 3
Q05655	5580	PRKCD	protein kinase C delta
P30559	5021	OXTR	oxytocin receptor
P31639	6524	SLC5A2	solute carrier family 5 member 2
Q16512	5585	PKN1	protein kinase N1
P16152	873	CBR1	carbonyl reductase 1
Q9UGI9	53632	PRKAG3	protein kinase AMP-activated non-catalytic subunit gamma 3
Q9UPZ9	22858	ICK	intestinal cell kinase
P13569	1080	CFTR	cystic fibrosis transmembrane conductance regulator
P50613	1022	CDK7	cyclin dependent kinase 7
P59538	259290	TAS2R31	taste 2 receptor member 31
P15428	3248	HPGD	15-hydroxyprostaglandin dehydrogenase
Q08493	5143	PDE4C	phosphodiesterase 4C
Q04206	5970	RELA	RELA proto-oncogene, NF-kB subunit
Q9Y463	9149	DYRK1B	dual specificity tyrosine phosphorylation regulated kinase 1B
P40225	7066	THPO	thrombopoietin
P18031	5770	PTPN1	protein tyrosine phosphatase, non-receptor type 1
P51570	2584	GALK1	galactokinase 1
Q8N1Q1	377677	CA13	carbonic anhydrase 13
O94956	11309	SLCO2B1	solute carrier organic anion transporter family member 2B1
P04150	2908	NR3C1	nuclear receptor subfamily 3 group C member 1
P49798	5999	RGS4	regulator of G protein signaling 4
P34972	1269	CNR2	cannabinoid receptor 2
P21917	1815	DRD4	dopamine receptor D4
P08581	4233	MET	MET proto-oncogene, receptor tyrosine kinase
P46063	5965	RECQL	RecQ like helicase
P16581	6401	SELE	selectin E
O00519	2166	FAAH	fatty acid amide hydrolase
P29372	4350	MPG	N-methylpurine DNA glycosylase
P29597	7297	TYK2	tyrosine kinase 2
P10632	1558	CYP2C8	cytochrome P450 family 2 subfamily C member 8
P98170	331	XIAP	X-linked inhibitor of apoptosis
Q00536	5127	CDK16	cyclin dependent kinase 16
P17405	6609	SMPD1	sphingomyelin phosphodiesterase 1
P35462	1814	DRD3	dopamine receptor D3
P10828	7068	THRB	thyroid hormone receptor beta
P10721	3815	KIT	KIT proto-oncogene receptor tyrosine kinase
Q9BWU1	23097	CDK19	cyclin dependent kinase 19
P15735	5261	PHKG2	phosphorylase kinase catalytic subunit gamma 2
O96020	9134	CCNE2	cyclin E2
P35503	54659	UGT1A3	UDP glucuronosyltransferase family 1 member A3
P05412	3725	JUN	Jun proto-oncogene, AP-1 transcription factor subunit
P53350	5347	PLK1	polo like kinase 1
