# Supplementary material for: Exploring the Mechanism of Flavonoids Through Systematic Bioinformatics Analysis
Source: Front Pharmacol. 2018 Aug 15;9:918. doi: 10.3389/fphar.2018.00918 (PMC6104453; doi:10.3389/fphar.2018.00918)
Supplement: Supplementary file 2 [file Table_2.xlsx]

## Sheet: KEGG_QM_result
Supplementary Table 2. KEGG enrichment pathway of flavonoids' targets.
ID	AClass	BClass	Description	flavonoids_LogP	flavonoids_ratio	Flavan3ols_LogP	Flavan3ols_ratio	Flavanones_LogP	Flavanones_ratio	Flavanonol_LogP	Flavanonol_ratio	Flavones_LogP	Flavones_ratio	Flavonols_LogP	Flavonols_ratio	Isoflavones_LogP	Isoflavones_ratio	Others_LogP	Others_ratio
hsa01200	Metabolism	Global and overview maps	Carbon metabolism	-1.45263	1.25	-1.83357	2.9703	-0.821046	1.47059	0	0	-0.609314	0.884956	-0.886017	1.21457	-0.890878	1.62602	-0.230931	0.574713
hsa00040	Metabolism	Carbohydrate metabolism	Pentose and glucuronate interconversions	-11.565	2.5	-0.848601	0.990099	-7.29618	4.41176	0	0	-7.50664	2.35988	-11.6641	4.04858	-9.23846	5.69106	-1.54851	1.14943
hsa00051	Metabolism	Carbohydrate metabolism	Fructose and mannose metabolism	-3.20605	1.04167	0	0	-0.741937	0.735294	0	0	-1.88006	0.884956	-2.2545	1.21457	-3.11478	2.43902	-1.57266	1.14943
hsa00052	Metabolism	Carbohydrate metabolism	Galactose metabolism	-4.37316	1.25	-2.07084	1.9802	-0.766561	0.735294	-0.951452	1.16279	-5.22642	1.76991	-2.33167	1.21457	-3.19547	2.43902	-1.62349	1.14943
hsa00053	Metabolism	Carbohydrate metabolism	Ascorbate and aldarate metabolism	-9.97213	2.08333	-0.942104	0.990099	-6.26839	3.67647	0	0	-5.60013	1.76991	-9.46285	3.23887	-8.20101	4.87805	0	0
hsa00500	Metabolism	Carbohydrate metabolism	Starch and sucrose metabolism	-3.02784	1.04167	-1.94525	1.9802	-0.70793	0.735294	-0.890531	1.16279	-2.69341	1.17994	-2.14812	1.21457	-1.78282	1.62602	-0.613283	0.574713
hsa00620	Metabolism	Carbohydrate metabolism	Pyruvate metabolism	-1.30224	0.625	-0.793718	0.990099	-1.63544	1.47059	0	0	-0.350153	0.294985	-1.16739	0.809717	-1.71695	1.62602	-0.583304	0.574713
hsa00910	Metabolism	Energy metabolism	Nitrogen metabolism	-16.3697	2.5	-24.6937	11.8812	-3.86219	2.20588	-25.5842	13.9535	-6.92369	1.76991	-15.422	4.04858	-5.7207	3.25203	-5.12206	2.29885
hsa00100	Metabolism	Lipid metabolism	Steroid biosynthesis	-2.07797	0.625	0	0	-2.19415	1.47059	0	0	-1.44547	0.589971	0	0	0	0	-0.842726	0.574713
hsa00140	Metabolism	Lipid metabolism	Steroid hormone biosynthesis	-17.2717	3.95833	-2.64709	2.9703	-15	8.82353	-2.84701	3.48837	-15.6625	4.71976	-16.2976	6.07287	-13.8281	8.94309	-1.99029	1.72414
hsa00561	Metabolism	Lipid metabolism	Glycerolipid metabolism	-2.07781	1.04167	0	0	-0.521998	0.735294	0	0	-1.22777	0.884956	-0.320149	0.404858	-3.51599	3.25203	-0.434921	0.574713
hsa00600	Metabolism	Lipid metabolism	Sphingolipid metabolism	-2.50146	1.04167	-0.720172	0.990099	-1.48497	1.47059	-1.85643	2.32558	-3.16569	1.47493	-2.76078	1.61943	-2.66586	2.43902	-1.29176	1.14943
hsa00590	Metabolism	Lipid metabolism	Arachidonic acid metabolism	-12.8087	3.33333	-2.56432	2.9703	-11.4239	7.35294	-5.40658	5.81395	-8.7113	3.24484	-11.515	4.8583	-4.64772	4.06504	-11.8166	6.32184
hsa00591	Metabolism	Lipid metabolism	Linoleic acid metabolism	-8.24139	1.875	-3.53282	2.9703	-7.73742	4.41176	-5.36029	4.65116	-5.40574	1.76991	-9.18476	3.23887	-4.7436	3.25203	-5.5775	2.87356
hsa00230	Metabolism	Nucleotide metabolism	Purine metabolism	-1.88816	1.875	-0.732703	1.9802	-1.04769	2.20588	-0.31059	1.16279	-0.308567	0.884956	-1.35729	2.02429	-0.606292	1.62602	-1.93265	2.87356
hsa00250	Metabolism	Amino acid metabolism	Alanine, aspartate and glutamate metabolism	-2.20009	0.833333	-1.96882	1.9802	-0.718905	0.735294	-0.901962	1.16279	-2.73945	1.17994	-0.494569	0.404858	0	0	-0.623919	0.574713
hsa00330	Metabolism	Amino acid metabolism	Arginine and proline metabolism	-1.66471	0.833333	0	0	-1.43572	1.47059	0	0	-1.4053	0.884956	-0.982489	0.809717	-1.51546	1.62602	-1.24391	1.14943
hsa00340	Metabolism	Amino acid metabolism	Histidine metabolism	-1.8559	0.625	0	0	-0.868824	0.735294	0	0	-1.30029	0.589971	-1.55015	0.809717	-2.12278	1.62602	-1.83477	1.14943
hsa00350	Metabolism	Amino acid metabolism	Tyrosine metabolism	-2.20009	0.833333	0	0	-0.718905	0.735294	0	0	-1.01291	0.589971	-2.18243	1.21457	-1.80611	1.62602	-2.60759	1.72414
hsa00360	Metabolism	Amino acid metabolism	Phenylalanine metabolism	-2.28185	0.625	0	0	-1.00964	0.735294	0	0	-1.57789	0.589971	-1.83577	0.809717	-2.41934	1.62602	-2.1268	1.14943
hsa00380	Metabolism	Amino acid metabolism	Tryptophan metabolism	-4.71455	1.45833	-0.783661	0.990099	-4.00912	2.94118	-0.84798	1.16279	-3.49597	1.47493	-5.3392	2.42915	-4.17852	3.25203	-1.41838	1.14943
hsa00480	Metabolism	Metabolism of other amino acids	Glutathione metabolism	-2.23985	1.04167	-0.666392	0.990099	-1.37495	1.47059	0	0	-1.32184	0.884956	-0.927048	0.809717	-0.591595	0.813008	-0.465607	0.574713
hsa00730	Metabolism	Metabolism of cofactors and vitamins	Thiamine metabolism	-3.52051	0.833333	-2.64014	1.9802	-3.94459	2.20588	0	0	-4.10065	1.17994	-3.18365	1.21457	0	0	-3.62859	1.72414
hsa00790	Metabolism	Metabolism of cofactors and vitamins	Folate biosynthesis	-3.6381	0.833333	-4.41779	2.9703	-4.03284	2.20588	0	0	-2.87236	0.884956	-3.27031	1.21457	0	0	-3.7163	1.72414
hsa00830	Metabolism	Metabolism of cofactors and vitamins	Retinol metabolism	-12.4593	3.33333	-3.68091	3.9604	-11.2091	7.35294	-3.95076	4.65116	-9.66217	3.53982	-14.0342	5.66802	-11.6489	8.13008	-1.04606	1.14943
hsa00860	Metabolism	Metabolism of cofactors and vitamins	Porphyrin and chlorophyll metabolism	-6.6996	1.875	-0.764346	0.990099	-5.27721	3.67647	0	0	-4.43411	1.76991	-7.79881	3.23887	-5.4911	4.06504	0	0
hsa00232	Metabolism	Biosynthesis of other secondary metabolites	Caffeine metabolism	-2.36279	0.416667	-3.70535	1.9802	-3.44715	1.47059	-3.84517	2.32558	-2.65977	0.589971	-2.93169	0.809717	-3.53425	1.62602	0	0
hsa00980	Metabolism	Xenobiotics biodegradation and metabolism	Metabolism of xenobiotics by cytochrome P450	-13.8434	3.75	-2.34712	2.9703	-12.111	8.08824	-2.54365	3.48837	-12.5622	4.42478	-13.1984	5.66802	-12.5961	8.94309	-1.70665	1.72414
hsa00982	Metabolism	Xenobiotics biodegradation and metabolism	Drug metabolism - cytochrome P450	-14.3053	3.75	-2.41495	2.9703	-10.8746	7.35294	-2.61233	3.48837	-11.6781	4.12979	-16.4101	6.47773	-12.8741	8.94309	-3.68016	2.87356
hsa00983	Metabolism	Xenobiotics biodegradation and metabolism	Drug metabolism - other enzymes	-11.0724	2.70833	-2.93829	2.9703	-11.1309	6.61765	-1.87425	2.32558	-6.41735	2.35988	-10.2215	4.04858	-8.26416	5.69106	-0.522698	0.574713
hsa04141	Genetic Information Processing	Folding, sorting and degradation	Protein processing in endoplasmic reticulum	-3.04997	2.29167	-1.41213	2.9703	-1.10039	2.20588	-1.58958	3.48837	-1.88519	2.0649	-1.43972	2.02429	-1.203	2.43902	-0.862015	1.72414
hsa03410	Genetic Information Processing	Replication and repair	Base excision repair	-3.20605	1.04167	-3.36436	2.9703	-2.98847	2.20588	-3.56963	3.48837	-2.83627	1.17994	-3.34811	1.61943	-3.11478	2.43902	-2.68173	1.72414
hsa03450	Genetic Information Processing	Replication and repair	Non-homologous end-joining	-1.5196	0.416667	-1.2462	0.990099	-1.121	0.735294	-1.3143	1.16279	-1.8022	0.589971	-0.874531	0.404858	-1.16314	0.813008	-1.01834	0.574713
hsa03460	Genetic Information Processing	Replication and repair	Fanconi anemia pathway	-3.79715	1.45833	-2.71333	2.9703	-4.69284	3.67647	-4.23595	4.65116	-3.76291	1.76991	-5.64584	2.83401	-4.90403	4.06504	-5.38573	3.44828
hsa02010	Environmental Information Processing	Membrane transport	ABC transporters	-4.36809	1.45833	-1.76027	1.9802	-3.80699	2.94118	-1.89248	2.32558	-4.25949	1.76991	-2.8315	1.61943	-2.72035	2.43902	0	0
hsa04014	Environmental Information Processing	Signal transduction	Ras signaling pathway	-16.6215	6.66667	-4.13156	6.93069	-1.90972	3.67647	-1.25067	3.48837	-13.0922	7.07965	-5.07723	4.8583	-1.444	3.25203	-8.55456	8.04598
hsa04015	Environmental Information Processing	Signal transduction	Rap1 signaling pathway	-13.979	5.83333	-3.43181	5.94059	-1.41324	2.94118	-0.718547	2.32558	-11.0542	6.19469	-7.9172	6.07287	-1.54999	3.25203	-8.99335	8.04598
hsa04010	Environmental Information Processing	Signal transduction	MAPK signaling pathway	-27.4573	9.375	-3.81769	6.93069	-3.78823	5.88235	-1.13079	3.48837	-28.211	11.7994	-8.44558	6.88259	-4.94671	7.31707	-6.13455	6.89655
hsa04012	Environmental Information Processing	Signal transduction	ErbB signaling pathway	-16.0893	4.375	-2.16559	2.9703	-2.73588	2.94118	-0.551851	1.16279	-13.9684	5.01475	-5.3262	3.23887	-1.93247	2.43902	-5.33178	4.02299
hsa04310	Environmental Information Processing	Signal transduction	Wnt signaling pathway	-9.64947	3.95833	-2.40429	3.9604	-3.62966	4.41176	-0.984618	2.32558	-9.28029	4.71976	-5.38125	4.04858	-2.10356	3.25203	-1.00395	1.72414
hsa04330	Environmental Information Processing	Signal transduction	Notch signaling pathway	-4.18179	1.45833	-2.88443	2.9703	0	0	0	0	-0.286323	0.294985	-0.386064	0.404858	-0.635992	0.813008	-3.29053	2.29885
hsa04340	Environmental Information Processing	Signal transduction	Hedgehog signaling pathway	-2.50146	1.04167	-0.720172	0.990099	-0.605905	0.735294	0	0	-3.16569	1.47493	-1.02772	0.809717	0	0	0	0
hsa04350	Environmental Information Processing	Signal transduction	TGF-beta signaling pathway	-2.67769	1.45833	-2.19382	2.9703	-1.84311	2.20588	-1.38719	2.32558	-2.77411	1.76991	-0.629278	0.809717	-1.96009	2.43902	-0.86197	1.14943
hsa04370	Environmental Information Processing	Signal transduction	VEGF signaling pathway	-14.4548	3.54167	-5.17026	4.9505	-2.26286	2.20588	-1.66978	2.32558	-14.1339	4.42478	-7.81343	3.64372	-0.558738	0.813008	-7.76897	4.5977
hsa04371	Environmental Information Processing	Signal transduction	Apelin signaling pathway	-7.36505	3.33333	-0.895135	1.9802	-0.693309	1.47059	-1.01046	2.32558	-5.90862	3.53982	-3.07742	2.83401	-0.759608	1.62602	-3.1428	3.44828
hsa04630	Environmental Information Processing	Signal transduction	Jak-STAT signaling pathway	-5.88382	3.125	-0.810035	1.9802	-0.615272	1.47059	0	0	-3.88334	2.94985	-2.7687	2.83401	-4.61752	5.69106	-2.13492	2.87356
hsa04064	Environmental Information Processing	Signal transduction	NF-kappa B signaling pathway	-16.295	4.58333	-5.35771	5.94059	-2.57812	2.94118	-3.3162	4.65116	-14.4146	5.30973	-7.03122	4.04858	-1.81664	2.43902	-1.4277	1.72414
hsa04668	Environmental Information Processing	Signal transduction	TNF signaling pathway	-17.2768	5	-7.52487	7.92079	-3.29797	3.67647	-4.23009	5.81395	-15.7509	5.89971	-12.0395	6.07287	-3.49826	4.06504	-6.79372	5.17241
hsa04066	Environmental Information Processing	Signal transduction	HIF-1 signaling pathway	-22.9301	5.83333	-7.75472	7.92079	-1.63227	2.20588	-2.16559	3.48837	-17.6085	6.19469	-6.77711	4.04858	-4.7123	4.87805	-7.0462	5.17241
hsa04068	Environmental Information Processing	Signal transduction	FoxO signaling pathway	-24.1327	6.66667	-2.52865	3.9604	-3.81868	4.41176	-1.04298	2.32558	-18.6036	7.07965	-13.0191	6.88259	-3.10009	4.06504	-5.05712	4.5977
hsa04020	Environmental Information Processing	Signal transduction	Calcium signaling pathway	-10.2539	4.58333	-0.251906	0.990099	-1.60865	2.94118	-0.298682	1.16279	-7.75078	4.71976	-3.7255	3.64372	-0.58217	1.62602	-1.27687	2.29885
hsa04072	Environmental Information Processing	Signal transduction	Phospholipase D signaling pathway	-7.81509	3.54167	-0.316926	0.990099	-1.92377	2.94118	-1.7345	3.48837	-6.47157	3.83481	-8.07718	5.26316	-2.07251	3.25203	-5.68459	5.17241
hsa04071	Environmental Information Processing	Signal transduction	Sphingolipid signaling pathway	-15.2432	4.79167	-3.71746	4.9505	-5.12304	5.14706	-4.04725	5.81395	-16.1409	6.19469	-10.3252	5.66802	-5.41153	5.69106	-3.50406	3.44828
hsa04024	Environmental Information Processing	Signal transduction	cAMP signaling pathway	-17.4566	6.45833	-3.56834	5.94059	-5.47811	6.61765	-2.1546	4.65116	-12.486	6.48968	-11.1269	7.28745	-4.87354	6.50407	-7.3218	6.89655
hsa04022	Environmental Information Processing	Signal transduction	cGMP-PKG signaling pathway	-4.96056	2.91667	-0.283698	0.990099	-1.76429	2.94118	-0.891196	2.32558	-3.72719	2.94985	-4.87811	4.04858	-0.228067	0.813008	-1.42224	2.29885
hsa04151	Environmental Information Processing	Signal transduction	PI3K-Akt signaling pathway	-22.861	9.58333	-4.62826	8.91089	-4.35163	7.35294	-0.846264	3.48837	-16.639	9.73451	-12.2016	9.7166	-3.95528	7.31707	-11.6063	11.4943
hsa04152	Environmental Information Processing	Signal transduction	AMPK signaling pathway	-9.0808	3.54167	-0.98908	1.9802	-1.43209	2.20588	-0.430489	1.16279	-8.38486	4.12979	-2.65854	2.42915	-0.849247	1.62602	-2.60159	2.87356
hsa04150	Environmental Information Processing	Signal transduction	mTOR signaling pathway	-10.1	4.16667	-0.306619	0.990099	-1.87461	2.94118	-0.356894	1.16279	-8.9284	4.71976	-2.84979	2.83401	-0.700111	1.62602	-2.93969	3.44828
hsa04080	Environmental Information Processing	Signaling molecules and interaction	Neuroactive ligand-receptor interaction	-16.5481	7.29167	-0.88892	2.9703	-2.8179	5.14706	-3.163	6.97674	-8.78478	6.19469	-11.338	8.50202	-1.17972	3.25203	-3.49132	5.17241
hsa04060	Environmental Information Processing	Signaling molecules and interaction	Cytokine-cytokine receptor interaction	-3.61854	3.33333	-0.916397	2.9703	-0.313137	1.47059	-1.07327	3.48837	-2.56319	3.24484	-1.52577	2.83401	-1.21668	3.25203	-0.804939	2.29885
hsa04144	Cellular Processes	Transport and catabolism	Endocytosis	-3.80455	3.33333	-0.952342	2.9703	-0.682715	2.20588	-0.582887	2.32558	-1.76036	2.65487	-1.17205	2.42915	-0.381028	1.62602	-3.70576	5.17241
hsa04142	Cellular Processes	Transport and catabolism	Lysosome	-2.3121	1.66667	-1.74621	2.9703	-1.41427	2.20588	-1.93247	3.48837	-2.58101	2.0649	-1.93826	2.02429	-3.23901	4.06504	-1.81505	2.29885
hsa04140	Cellular Processes	Transport and catabolism	Autophagy - animal	-12.4182	4.375	-3.55319	4.9505	-1.37124	2.20588	-1.88603	3.48837	-10.0082	4.71976	-4.067	3.23887	-0.810516	1.62602	-4.20429	4.02299
hsa04137	Cellular Processes	Transport and catabolism	Mitophagy - animal	-7.95893	2.5	-1.46286	1.9802	-2.14596	2.20588	-0.65699	1.16279	-7.35037	2.94985	-6.26201	3.23887	-2.26638	2.43902	-1.85633	1.72414
hsa04110	Cellular Processes	Cell growth and death	Cell cycle	-12.6994	4.375	-0.97138	1.9802	-3.02599	3.67647	-0.422133	1.16279	-10.2195	4.71976	-6.90421	4.45344	-1.51537	2.43902	-2.55553	2.87356
hsa04114	Cellular Processes	Cell growth and death	Oocyte meiosis	-9.81811	3.75	-0.97138	1.9802	-1.4055	2.20588	-1.08917	2.32558	-10.2195	4.71976	-4.16422	3.23887	-1.51537	2.43902	-2.55553	2.87356
hsa04210	Cellular Processes	Cell growth and death	Apoptosis	-16.7729	5.41667	-4.43	5.94059	-5.70732	5.88235	-1.79904	3.48837	-12.5458	5.60472	-10.4692	6.07287	-6.03729	6.50407	-5.88845	5.17241
hsa04215	Cellular Processes	Cell growth and death	Apoptosis - multiple species	-5.29853	1.45833	-0.860623	0.990099	0	0	0	0	-2.83627	1.17994	-3.34811	1.61943	0	0	-0.64627	0.574713
hsa04115	Cellular Processes	Cell growth and death	p53 signaling pathway	-8.68646	2.70833	0	0	-2.07453	2.20588	0	0	-6.04182	2.65487	-7.2006	3.64372	-0.501865	0.813008	-1.0023	1.14943
hsa04510	Cellular Processes	Cellular community - eukaryotes	Focal adhesion	-11.9497	5.20833	-5.49311	7.92079	-2.14072	3.67647	-0.272248	1.16279	-7.2045	4.71976	-4.88099	4.45344	-1.02016	2.43902	-4.59595	5.17241
hsa04520	Cellular Processes	Cellular community - eukaryotes	Adherens junction	-14.0704	3.75	-6.06695	5.94059	-3.02241	2.94118	-2.57747	3.48837	-7.99522	3.24484	-7.03637	3.64372	-3.18548	3.25203	-7.07377	4.5977
hsa04530	Cellular Processes	Cellular community - eukaryotes	Tight junction	-4.75303	2.91667	-0.751972	1.9802	-0.191126	0.735294	0	0	-4.9667	3.53982	-0.543725	1.21457	-0.216858	0.813008	-0.134586	0.574713
hsa04540	Cellular Processes	Cellular community - eukaryotes	Gap junction	-8.30215	2.91667	-0.485469	0.990099	-1.78931	2.20588	-1.35076	2.32558	-8.08905	3.53982	-4.2837	2.83401	-1.90558	2.43902	-3.2185	2.87356
hsa04550	Cellular Processes	Cellular community - eukaryotes	Signaling pathways regulating pluripotency of stem cells	-5.77206	2.91667	-1.60778	2.9703	-1.28342	2.20588	-1.0052	2.32558	-4.303	2.94985	-4.63006	3.64372	-1.39067	2.43902	-3.97862	4.02299
hsa04810	Cellular Processes	Cell motility	Regulation of actin cytoskeleton	-1.41513	1.875	-0.609569	1.9802	-0.139966	0.735294	-0.712321	2.32558	-0.207068	0.884956	-1.07341	2.02429	-0.491918	1.62602	-3.60151	4.5977
hsa04640	Organismal Systems	Immune system	Hematopoietic cell lineage	-1.7551	1.25	0	0	-0.351889	0.735294	-1.27519	2.32558	-1.80579	1.47493	-1.04174	1.21457	-1.00653	1.62602	-0.763465	1.14943
hsa04611	Organismal Systems	Immune system	Platelet activation	-6.42081	2.91667	-2.63951	3.9604	-1.41427	2.20588	-1.09519	2.32558	-4.76143	2.94985	-6.94038	4.45344	-0.8379	1.62602	-2.57074	2.87356
hsa04620	Organismal Systems	Immune system	Toll-like receptor signaling pathway	-14.2942	4.375	-3.97533	4.9505	-2.43651	2.94118	-2.13062	3.48837	-13.6914	5.30973	-6.6565	4.04858	-4.63988	4.87805	-2.89086	2.87356
hsa04621	Organismal Systems	Immune system	NOD-like receptor signaling pathway	-13.535	5.20833	-4.93426	6.93069	-1.07652	2.20588	-1.56305	3.48837	-10.9037	5.60472	-6.38982	4.8583	-4.37859	5.69106	-1.36619	2.29885
hsa04622	Organismal Systems	Immune system	RIG-I-like receptor signaling pathway	-10.7775	3.125	-3.55664	3.9604	-1.17449	1.47059	-2.61233	3.48837	-10.4535	3.83481	-6.01055	3.23887	-3.23185	3.25203	-1.77041	1.72414
hsa04623	Organismal Systems	Immune system	Cytosolic DNA-sensing pathway	-1.93245	1.04167	-1.47519	1.9802	-0.492802	0.735294	-0.662935	1.16279	-1.80271	1.17994	-0.808142	0.809717	-1.3204	1.62602	-1.05751	1.14943
hsa04650	Organismal Systems	Immune system	Natural killer cell mediated cytotoxicity	-3.24281	2.08333	-0.346124	0.990099	-0.717426	1.47059	-0.398515	1.16279	-3.72554	2.65487	-1.80364	2.02429	-0.784452	1.62602	-0.56203	1.14943
hsa04612	Organismal Systems	Immune system	Antigen processing and presentation	-2.22215	1.25	-1.32958	1.9802	-0.428287	0.735294	-0.592837	1.16279	-0.959006	0.884956	-1.27862	1.21457	-2.06296	2.43902	-0.923284	1.14943
hsa04660	Organismal Systems	Immune system	T cell receptor signaling pathway	-16.6307	4.79167	-5.15403	5.94059	-4.41751	4.41176	-2.14215	3.48837	-17.4212	6.19469	-7.74483	4.45344	-4.66376	4.87805	-2.90958	2.87356
hsa04658	Organismal Systems	Immune system	Th1 and Th2 cell differentiation	-13.1787	3.95833	-5.43896	5.94059	-2.62876	2.94118	-2.27782	3.48837	-12.2673	4.71976	-7.1653	4.04858	-4.94472	4.87805	-1.46277	1.72414
hsa04659	Organismal Systems	Immune system	Th17 cell differentiation	-23.421	6.04167	-7.55669	7.92079	-5.40492	5.14706	-4.24938	5.81395	-18.3108	6.48968	-14.5794	6.88259	-9.43934	8.13008	-5.73817	4.5977
hsa04657	Organismal Systems	Immune system	IL-17 signaling pathway	-20.1644	5.20833	-8.03959	7.92079	-4.66931	4.41176	-7.17567	8.13953	-17.1032	5.89971	-13.0259	6.07287	-4.91768	4.87805	-7.35999	5.17241
hsa04662	Organismal Systems	Immune system	B cell receptor signaling pathway	-8.52623	2.70833	-4.77364	4.9505	-3.04522	2.94118	-1.52044	2.32558	-8.06141	3.24484	-4.89401	2.83401	-3.20849	3.25203	-3.65114	2.87356
hsa04664	Organismal Systems	Immune system	Fc epsilon RI signaling pathway	-13.3219	3.54167	-2.45048	2.9703	-3.11584	2.94118	-1.55504	2.32558	-11.8617	4.12979	-8.4599	4.04858	-1.27339	1.62602	-2.72073	2.29885
hsa04666	Organismal Systems	Immune system	Fc gamma R-mediated phagocytosis	-4.61899	2.08333	-0.473622	0.990099	-0.980008	1.47059	-0.531192	1.16279	-5.94535	2.94985	-1.74694	1.61943	-0.405783	0.813008	-1.47477	1.72414
hsa04670	Organismal Systems	Immune system	Leukocyte transendothelial migration	-6.01458	2.70833	-1.83357	2.9703	-1.49734	2.20588	-1.15207	2.32558	-6.8111	3.53982	-5.32799	3.64372	-0.332592	0.813008	-2.71453	2.87356
hsa04062	Organismal Systems	Immune system	Chemokine signaling pathway	-10.2539	4.58333	-1.31348	2.9703	-1.0091	2.20588	-1.48769	3.48837	-6.93172	4.42478	-2.39494	2.83401	-2.48694	4.06504	-3.26339	4.02299
hsa04911	Organismal Systems	Endocrine system	Insulin secretion	-4.88222	2.08333	0	0	-2.75455	2.94118	0	0	-6.22331	2.94985	-1.84561	1.61943	-1.94619	2.43902	-1.55026	1.72414
hsa04910	Organismal Systems	Endocrine system	Insulin signaling pathway	-12.7163	4.58333	-0.895135	1.9802	-2.81918	3.67647	-1.01046	2.32558	-11.5061	5.30973	-4.65502	3.64372	-0.759608	1.62602	-3.1428	3.44828
hsa04922	Organismal Systems	Endocrine system	Glucagon signaling pathway	-9.24201	3.33333	-1.10756	1.9802	-1.61022	2.20588	0	0	-8.29374	3.83481	-2.25466	2.02429	-1.7238	2.43902	-0.723531	1.14943
hsa04923	Organismal Systems	Endocrine system	Regulation of lipolysis in adipocytes	-6.74298	2.08333	-2.73629	2.9703	-4.73213	3.67647	-2.93706	3.48837	-5.86207	2.35988	-6.90278	3.23887	-2.49328	2.43902	-4.21983	2.87356
hsa04920	Organismal Systems	Endocrine system	Adipocytokine signaling pathway	-15.6768	3.95833	-2.43258	2.9703	-3.09192	2.94118	-1.54332	2.32558	-13.0403	4.42478	-4.97677	2.83401	-4.4212	4.06504	-3.70965	2.87356
hsa03320	Organismal Systems	Endocrine system	PPAR signaling pathway	-3.07091	1.45833	-0.558052	0.990099	-4.12403	3.67647	-1.50927	2.32558	-1.63363	1.17994	-2.09203	1.61943	-2.1431	2.43902	-3.62258	2.87356
hsa04912	Organismal Systems	Endocrine system	GnRH signaling pathway	-20.2918	5.20833	-4.22876	4.9505	-2.62876	2.94118	-1.31615	2.32558	-18.5099	6.19469	-9.4157	4.8583	-3.82353	4.06504	-4.09716	3.44828
hsa04913	Organismal Systems	Endocrine system	Ovarian steroidogenesis	-11.8175	2.91667	-0.696096	0.990099	-9.20815	5.88235	-3.03456	3.48837	-9.77522	3.24484	-11.2507	4.45344	-6.51565	4.87805	-5.63297	3.44828
hsa04915	Organismal Systems	Endocrine system	Estrogen signaling pathway	-10.5696	3.54167	-4.09779	4.9505	-4.53983	4.41176	-2.20173	3.48837	-9.61527	4.12979	-6.90192	4.04858	-5.95349	5.69106	-9.57727	6.32184
hsa04914	Organismal Systems	Endocrine system	Progesterone-mediated oocyte maturation	-17.366	4.79167	-2.03461	2.9703	-0.94154	1.47059	-0.511833	1.16279	-14.3303	5.30973	-10.3644	5.26316	-1.80456	2.43902	-3.99422	3.44828
hsa04917	Organismal Systems	Endocrine system	Prolactin signaling pathway	-16.8219	4.16667	-3.55664	3.9604	-4.18281	3.67647	-1.53179	2.32558	-12.9414	4.42478	-13.5544	5.66802	-8.35202	6.50407	-5.93828	4.02299
hsa04921	Organismal Systems	Endocrine system	Oxytocin signaling pathway	-12.7068	4.79167	-1.50119	2.9703	-2.6231	3.67647	-0.936052	2.32558	-10.7367	5.30973	-5.98276	4.45344	-2.00291	3.25203	-3.71985	4.02299
hsa04918	Organismal Systems	Endocrine system	Thyroid hormone synthesis	-6.34202	2.29167	-1.3606	1.9802	-2.97784	2.94118	-1.48742	2.32558	-4.81444	2.35988	-3.79045	2.42915	-2.11032	2.43902	-1.70665	1.72414
hsa04919	Organismal Systems	Endocrine system	Thyroid hormone signaling pathway	-17.6297	5.20833	-3.75216	4.9505	-5.17206	5.14706	-2.00121	3.48837	-10.6675	4.71976	-7.20352	4.45344	-4.37173	4.87805	-12.4924	8.04598
hsa04916	Organismal Systems	Endocrine system	Melanogenesis	-6.63068	2.70833	-1.12221	1.9802	-2.48211	2.94118	-1.24412	2.32558	-6.44277	3.24484	-2.29048	2.02429	-0.977223	1.62602	-2.94766	2.87356
hsa04924	Organismal Systems	Endocrine system	Renin secretion	-1.30293	0.833333	0	0	-1.23098	1.47059	0	0	-1.78016	1.17994	-0.797547	0.809717	-0.523363	0.813008	-0.402118	0.574713
hsa04925	Organismal Systems	Endocrine system	Aldosterone synthesis and secretion	-4.20887	1.875	0	0	-1.0561	1.47059	0	0	-5.40264	2.65487	-0.644495	0.809717	-0.441207	0.813008	-0.32704	0.574713
hsa04261	Organismal Systems	Circulatory system	Adrenergic signaling in cardiomyocytes	-8.73759	3.75	-1.56831	2.9703	-2.73788	3.67647	-0.372276	1.16279	-10.1964	5.01475	-8.15007	5.26316	-1.35269	2.43902	-2.27919	2.87356
hsa04270	Organismal Systems	Circulatory system	Vascular smooth muscle contraction	-6.5094	2.91667	-0.98908	1.9802	-3.07382	3.67647	-1.1074	2.32558	-5.65386	3.24484	-2.65854	2.42915	-0.849247	1.62602	-2.60159	2.87356
hsa04970	Organismal Systems	Digestive system	Salivary secretion	-2.50747	1.45833	-0.477517	0.990099	-2.66356	2.94118	0	0	-2.62146	1.76991	-2.5043	2.02429	-1.06147	1.62602	-0.814271	1.14943
hsa04971	Organismal Systems	Digestive system	Gastric acid secretion	-4.5198	1.875	-0.543068	0.990099	-1.12247	1.47059	-0.602701	1.16279	-4.77111	2.35988	-2.03063	1.61943	-0.472278	0.813008	-0.355233	0.574713
hsa04972	Organismal Systems	Digestive system	Pancreatic secretion	-3.67685	1.875	-0.454898	0.990099	-1.68973	2.20588	-1.28319	2.32558	-3.20707	2.0649	-3.17793	2.42915	-0.387963	0.813008	-2.18246	2.29885
hsa04976	Organismal Systems	Digestive system	Bile secretion	-11.8165	3.33333	-6.10317	5.94059	-9.3562	6.61765	-6.51771	6.97674	-11.5886	4.12979	-7.09023	3.64372	-6.91783	5.69106	-4.73627	3.44828
hsa04973	Organismal Systems	Digestive system	Carbohydrate digestion and absorption	-2.62883	1.04167	-0.746014	0.990099	-1.53783	1.47059	-0.809786	1.16279	-2.37166	1.17994	-1.07655	0.809717	-1.61853	1.62602	-1.34323	1.14943
hsa04962	Organismal Systems	Excretory system	Vasopressin-regulated water reabsorption	-1.85125	0.833333	0	0	-0.63081	0.735294	0	0	-1.54721	0.884956	-1.07655	0.809717	-0.669256	0.813008	-0.538846	0.574713
hsa04960	Organismal Systems	Excretory system	Aldosterone-regulated sodium reabsorption	-3.92075	1.25	-0.814702	0.990099	-2.84256	2.20588	-0.879434	1.16279	-3.65881	1.47493	-3.1551	1.61943	-0.73655	0.813008	-0.60298	0.574713
hsa04961	Organismal Systems	Excretory system	Endocrine and other factor-regulated calcium reabsorption	-4.24228	1.45833	-0.720172	0.990099	-5.03166	3.67647	0	0	-5.21188	2.0649	-3.79609	2.02429	-3.9009	3.25203	-3.32571	2.29885
hsa04964	Organismal Systems	Excretory system	Proximal tubule bicarbonate reclamation	-1.9071	0.625	-3.8389	2.9703	-2.07491	1.47059	-4.04632	3.48837	-2.32077	0.884956	-2.7082	1.21457	-0.926958	0.813008	-1.87037	1.14943
hsa04724	Organismal Systems	Nervous system	Glutamatergic synapse	-1.45263	1.25	-1.03251	1.9802	-2.29481	2.94118	-1.15207	2.32558	-2.11917	1.76991	-1.43302	1.61943	-0.890878	1.62602	-1.23314	1.72414
hsa04727	Organismal Systems	Nervous system	GABAergic synapse	-3.2378	1.66667	-0.485469	0.990099	-1.00433	1.47059	-0.543422	1.16279	-3.4363	2.0649	-0.60028	0.809717	0	0	-0.829715	1.14943
hsa04725	Organismal Systems	Nervous system	Cholinergic synapse	-6.10348	2.70833	-1.85406	2.9703	-1.51688	2.20588	-1.16542	2.32558	-6.8965	3.53982	-2.10352	2.02429	-0.903356	1.62602	-1.95178	2.29885
hsa04728	Organismal Systems	Nervous system	Dopaminergic synapse	-12.2815	4.375	-0.353407	0.990099	-2.09576	2.94118	-0.406157	1.16279	-11.9582	5.30973	-8.69567	5.26316	-0.799938	1.62602	-1.7356	2.29885
hsa04726	Organismal Systems	Nervous system	Serotonergic synapse	-17.9235	5.20833	-3.80548	4.9505	-11.3781	8.82353	-6.59203	8.13953	-16.5452	6.19469	-16.7175	7.69231	-6.70276	6.50407	-13.9786	8.62069
hsa04720	Organismal Systems	Nervous system	Long-term potentiation	-8.85245	2.70833	-1.43883	1.9802	-1.2078	1.47059	-0.645404	1.16279	-9.50099	3.53982	-1.42837	1.21457	-0.512422	0.813008	-1.82108	1.72414
hsa04730	Organismal Systems	Nervous system	Long-term depression	-2.76648	1.25	-0.626192	0.990099	-2.24248	2.20588	-0.687804	1.16279	-2.68319	1.47493	-1.5505	1.21457	-1.37084	1.62602	-2.92272	2.29885
hsa04723	Organismal Systems	Nervous system	Retrograde endocannabinoid signaling	-10.3524	3.54167	-1.97474	2.9703	-1.63227	2.20588	-1.24412	2.32558	-10.5087	4.42478	-4.80667	3.23887	-0.977223	1.62602	-0.736499	1.14943
hsa04722	Organismal Systems	Nervous system	Neurotrophin signaling pathway	-26.9492	6.875	-4.79403	5.94059	-4.06664	4.41176	-1.11985	2.32558	-29.058	9.14454	-9.17442	5.26316	-3.3045	4.06504	-2.63305	2.87356
hsa04750	Organismal Systems	Sensory system	Inflammatory mediator regulation of TRP channels	-16.0873	4.58333	-1.15257	1.9802	-2.54537	2.94118	-0.508105	1.16279	-15.4683	5.60472	-5.91452	3.64372	-1.00653	1.62602	-0.763465	1.14943
hsa04360	Organismal Systems	Development	Axon guidance	-4.61167	2.91667	-0.732703	1.9802	-1.04769	2.20588	-0.31059	1.16279	-3.47876	2.94985	-1.35729	2.02429	-0.209275	0.813008	-1.32798	2.29885
hsa04380	Organismal Systems	Development	Osteoclast differentiation	-17.4513	5.41667	-5.70348	6.93069	-3.85497	4.41176	-1.86803	3.48837	-16.3967	6.48968	-8.69567	5.26316	-5.13313	5.69106	-3.27943	3.44828
hsa04211	Organismal Systems	Aging	Longevity regulating pathway	-12.3508	3.75	-3.15951	3.9604	-2.6813	2.94118	-2.31795	3.48837	-11.33	4.42478	-6.23338	3.64372	-3.89151	4.06504	-5.2322	4.02299
hsa04213	Organismal Systems	Aging	Longevity regulating pathway - multiple species	-8.2044	2.5	0	0	0	0	0	0	-4.4025	2.0649	-2.32104	1.61943	0	0	-3.9305	2.87356
hsa04710	Organismal Systems	Environmental adaptation	Circadian rhythm	-3.33601	1.04167	0	0	0	0	0	0	-4.03589	1.47493	-0.538309	0.404858	-0.80653	0.813008	0	0
hsa04713	Organismal Systems	Environmental adaptation	Circadian entrainment	-3.67685	1.875	-0.454898	0.990099	-1.68973	2.20588	-0.511833	1.16279	-4.83679	2.65487	-1.6707	1.61943	-1.01409	1.62602	-0.770431	1.14943
hsa05200	Human Diseases	Cancers: Overview	Pathways in cancer	-33.8071	12.7083	-12.7861	17.8218	-9.5659	12.5	-8.48025	15.1163	-24.6844	12.9794	-17.0429	12.5506	-8.36082	12.1951	-19.4272	16.6667
hsa05230	Human Diseases	Cancers: Overview	Central carbon metabolism in cancer	-14.9308	3.75	-4.96205	4.9505	-5.57445	4.41176	-5.30448	5.81395	-9.66217	3.53982	-12.6245	5.26316	-4.54738	4.06504	-14.594	7.47126
hsa05231	Human Diseases	Cancers: Overview	Choline metabolism in cancer	-8.548	3.125	-1.13721	1.9802	-2.51337	2.94118	-1.25948	2.32558	-7.49995	3.53982	-4.87056	3.23887	-1.76914	2.43902	-3.92018	3.44828
hsa05202	Human Diseases	Cancers: Overview	Transcriptional misregulation in cancer	-13.8627	5.41667	-6.9202	8.91089	-9.00022	8.82353	-7.53284	10.4651	-8.67315	5.01475	-8.8331	6.07287	-3.32924	4.87805	-8.81064	7.47126
hsa05206	Human Diseases	Cancers: Overview	MicroRNAs in cancer	-17.2171	7.70833	-8.00329	11.8812	-7.46578	9.55882	-2.99913	6.97674	-15.6234	8.84956	-9.87107	8.09717	-4.40227	7.31707	-7.0445	8.04598
hsa05205	Human Diseases	Cancers: Overview	Proteoglycans in cancer	-24.1923	7.91667	-5.4291	7.92079	-3.62446	5.14706	-2.11716	4.65116	-17.2201	7.9646	-10.9442	7.28745	-3.05575	4.87805	-11.3078	9.1954
hsa05204	Human Diseases	Cancers: Overview	Chemical carcinogenesis	-14.1581	3.95833	-3.29399	3.9604	-14.6107	9.55882	-3.55997	4.65116	-11.8718	4.42478	-15.2346	6.47773	-12.0869	8.94309	-2.42497	2.29885
hsa05203	Human Diseases	Cancers: Overview	Viral carcinogenesis	-18.2274	6.66667	-6.51311	8.91089	-3.65069	5.14706	-1.37975	3.48837	-8.77574	5.30973	-7.28889	5.66802	-6.79829	8.13008	-8.22784	7.47126
hsa05210	Human Diseases	Cancers: Specific types	Colorectal cancer	-9.48467	2.70833	-3.81599	3.9604	-5.78117	4.41176	-1.65612	2.32558	-10.0921	3.53982	-6.53659	3.23887	-3.48785	3.25203	-3.99876	2.87356
hsa05212	Human Diseases	Cancers: Specific types	Pancreatic cancer	-20.4384	4.58333	-6.37327	5.94059	-4.37092	3.67647	-2.72373	3.48837	-17.7209	5.30973	-10.0103	4.45344	-8.66914	6.50407	-7.48303	4.5977
hsa05214	Human Diseases	Cancers: Specific types	Glioma	-11.3821	3.125	-0.601855	0.990099	-2.16458	2.20588	-0.662935	1.16279	-10.9762	3.83481	-6.31495	3.23887	-2.28519	2.43902	-6.20689	4.02299
hsa05216	Human Diseases	Cancers: Specific types	Thyroid cancer	-4.54782	1.25	-2.12724	1.9802	-4.57201	2.94118	-2.26247	2.32558	-5.40574	1.76991	-4.83749	2.02429	-3.28198	2.43902	-5.5775	2.87356
hsa05221	Human Diseases	Cancers: Specific types	Acute myeloid leukemia	-15.03	3.54167	-2.71333	2.9703	-4.69284	3.67647	-5.66703	5.81395	-13.2372	4.12979	-9.40319	4.04858	-6.26421	4.87805	-9.43081	5.17241
hsa05220	Human Diseases	Cancers: Specific types	Chronic myeloid leukemia	-12.9849	3.54167	-3.53294	3.9604	-4.15319	3.67647	-2.59477	3.48837	-11.5886	4.12979	-7.09023	3.64372	-4.36108	4.06504	-8.40803	5.17241
hsa05218	Human Diseases	Cancers: Specific types	Melanoma	-6.66063	2.29167	-1.41558	1.9802	-1.18541	1.47059	-0.634204	1.16279	-5.04202	2.35988	-4.97677	2.83401	-2.19423	2.43902	-7.22101	4.5977
hsa05211	Human Diseases	Cancers: Specific types	Renal cell carcinoma	-5.03245	1.875	-4.96205	4.9505	-1.23098	1.47059	-1.59134	2.32558	-4.26829	2.0649	-3.13437	2.02429	-1.30834	1.62602	-3.83259	2.87356
hsa05219	Human Diseases	Cancers: Specific types	Bladder cancer	-14.5876	3.125	-7.55922	5.94059	-2.71286	2.20588	-4.74564	4.65116	-13.7137	3.83481	-7.88647	3.23887	-4.13576	3.25203	-10.6495	5.17241
hsa05215	Human Diseases	Cancers: Specific types	Prostate cancer	-20.956	5.20833	-8.27128	7.92079	-6.01105	5.14706	-2.34553	3.48837	-12.663	4.71976	-10.9225	5.26316	-6.30628	5.69106	-12.8631	7.47126
hsa05213	Human Diseases	Cancers: Specific types	Endometrial cancer	-6.01554	1.875	-1.67404	1.9802	-3.62799	2.94118	-0.759052	1.16279	-6.12672	2.35988	-4.76195	2.42915	-2.58868	2.43902	-4.38296	2.87356
hsa05224	Human Diseases	Cancers: Specific types	Breast cancer	-11.3923	4.375	-1.56831	2.9703	-4.55963	5.14706	-0.97958	2.32558	-10.1964	5.01475	-8.15007	5.26316	-4.84247	5.69106	-8.88221	6.89655
hsa05222	Human Diseases	Cancers: Specific types	Small cell lung cancer	-11.7034	3.54167	-3.25432	3.9604	-3.80544	3.67647	-1.38719	2.32558	-10.545	4.12979	-8.69634	4.45344	-1.96009	2.43902	-5.40035	4.02299
hsa05223	Human Diseases	Cancers: Specific types	Non-small cell lung cancer	-13.3086	3.33333	-2.64709	2.9703	-4.57949	3.67647	-0.700945	1.16279	-12.8875	4.12979	-7.88118	3.64372	-3.54465	3.25203	-6.50515	4.02299
hsa05323	Human Diseases	Immune diseases	Rheumatoid arthritis	-3.89194	1.875	-3.14125	3.9604	-0.988008	1.47059	-1.33324	2.32558	-2.62146	1.76991	-1.11685	1.21457	-1.06147	1.62602	-0.814271	1.14943
hsa05321	Human Diseases	Immune diseases	Inflammatory bowel disease (IBD)	-5.03245	1.875	-3.68091	3.9604	-2.14596	2.20588	-1.59134	2.32558	-4.26829	2.0649	-3.13437	2.02429	-10.103	7.31707	-1.04606	1.14943
hsa05010	Human Diseases	Neurodegenerative diseases	Alzheimer's disease	-4.72432	2.91667	-2.98129	4.9505	-3.21567	4.41176	-3.29857	5.81395	-4.22989	3.24484	-3.21051	3.23887	-3.4476	4.87805	-5.12201	5.17241
hsa05014	Human Diseases	Neurodegenerative diseases	Amyotrophic lateral sclerosis (ALS)	-5.93941	1.875	-1.65792	1.9802	-0.575402	0.735294	0	0	-6.05829	2.35988	-5.87339	2.83401	-1.49961	1.62602	-0.485742	0.574713
hsa05020	Human Diseases	Neurodegenerative diseases	Prion diseases	-2.20009	0.833333	-0.836954	0.990099	-1.72395	1.47059	-2.10291	2.32558	-2.73945	1.17994	-1.25045	0.809717	-1.80611	1.62602	-2.60759	1.72414
hsa05030	Human Diseases	Substance dependence	Cocaine addiction	-8.29066	2.29167	-2.85839	2.9703	-3.66218	2.94118	-1.82198	2.32558	-8.59596	2.94985	-7.24536	3.23887	-5.15379	4.06504	-4.42601	2.87356
hsa05031	Human Diseases	Substance dependence	Amphetamine addiction	-8.76871	2.70833	-0.579206	0.990099	-3.11584	2.94118	-0.639757	1.16279	-8.26674	3.24484	-3.99524	2.42915	-2.21182	2.43902	-2.72073	2.29885
hsa05032	Human Diseases	Substance dependence	Morphine addiction	-6.2824	2.5	0	0	-0.980008	1.47059	-0.531192	1.16279	-5.02684	2.65487	-1.74694	1.61943	-0.405783	0.813008	-1.47477	1.72414
hsa05034	Human Diseases	Substance dependence	Alcoholism	-8.72544	4.16667	-0.255023	0.990099	-1.01992	2.20588	-0.822226	2.32558	-3.38177	2.94985	-1.83524	2.42915	-1.76638	3.25203	-8.81064	7.47126
hsa05418	Human Diseases	Cardiovascular diseases	Fluid shear stress and atherosclerosis	-24.2349	6.875	-10.3863	10.8911	-2.76453	3.67647	-2.66756	4.65116	-19.0022	7.37463	-10.29	6.07287	-5.94332	6.50407	-10.0926	7.47126
hsa05410	Human Diseases	Cardiovascular diseases	Hypertrophic cardiomyopathy (HCM)	-1.49255	1.04167	0	0	0	0	-0.564935	1.16279	-2.07883	1.47493	-0.221853	0.404858	-1.12171	1.62602	-0.323276	0.574713
hsa04930	Human Diseases	Endocrine and metabolic diseases	Type II diabetes mellitus	-8.6049	2.29167	-1.74222	1.9802	-1.50216	1.47059	-0.792078	1.16279	-6.41735	2.35988	-3.84107	2.02429	-2.69278	2.43902	-1.30849	1.14943
hsa04932	Human Diseases	Endocrine and metabolic diseases	Non-alcoholic fatty liver disease (NAFLD)	-9.33853	3.95833	-1.53042	2.9703	-2.67311	3.67647	-0.955005	2.32558	-9.01425	4.71976	-5.22186	4.04858	-2.86506	4.06504	-2.21734	2.87356
hsa04931	Human Diseases	Endocrine and metabolic diseases	Insulin resistance	-27.3051	6.66667	-1.90717	2.9703	-4.32433	4.41176	-2.09676	3.48837	-22.2168	7.37463	-6.53985	4.04858	-4.56973	4.87805	-3.73463	3.44828
hsa04933	Human Diseases	Endocrine and metabolic diseases	AGE-RAGE signaling pathway in diabetic complications	-27.1597	6.45833	-9.20178	8.91089	-5.63098	5.14706	-4.41113	5.81395	-25.944	7.9646	-12.6108	6.07287	-8.43676	7.31707	-4.92572	4.02299
hsa05110	Human Diseases	Infectious diseases: Bacterial	Vibrio cholerae infection	-2.34647	1.04167	0	0	-1.42003	1.47059	0	0	-3.00187	1.47493	-0.968135	0.809717	-0.613045	0.813008	-0.485742	0.574713
hsa05120	Human Diseases	Infectious diseases: Bacterial	Epithelial cell signaling in Helicobacter pylori infection	-17.0996	4.16667	-4.8656	4.9505	-1.19651	1.47059	-1.55504	2.32558	-11.8617	4.12979	-9.71277	4.45344	-3.2797	3.25203	-4.84474	3.44828
hsa05132	Human Diseases	Infectious diseases: Bacterial	Salmonella infection	-7.4768	2.70833	-4.3694	4.9505	-1.81585	2.20588	-2.35958	3.48837	-7.16838	3.24484	-7.44921	4.04858	-2.8962	3.25203	-1.53725	1.72414
hsa05131	Human Diseases	Infectious diseases: Bacterial	Shigellosis	-11.2766	3.125	-3.68091	3.9604	-1.23098	1.47059	-2.7044	3.48837	-9.66217	3.53982	-6.26201	3.23887	-2.26638	2.43902	-2.79318	2.29885
hsa05133	Human Diseases	Infectious diseases: Bacterial	Pertussis	-11.3297	3.33333	-4.62936	4.9505	-1.96009	2.20588	-2.51081	3.48837	-11.1624	4.12979	-7.97694	4.04858	-4.21855	4.06504	-1.67626	1.72414
hsa05134	Human Diseases	Infectious diseases: Bacterial	Legionellosis	-4.6948	1.66667	-1.59671	1.9802	-0.547559	0.735294	-1.72705	2.32558	-3.76291	1.76991	-2.50888	1.61943	-2.47064	2.43902	-1.17105	1.14943
hsa05152	Human Diseases	Infectious diseases: Bacterial	Tuberculosis	-10.3972	4.58333	-4.7889	6.93069	-1.02539	2.20588	-0.826055	2.32558	-9.59536	5.30973	-5.31766	4.45344	-3.34205	4.87805	-1.89359	2.87356
hsa05166	Human Diseases	Infectious diseases: Viral	HTLV-I infection	-13.4108	6.25	-5.63852	8.91089	-3.77662	5.88235	-1.12682	3.48837	-11.946	7.07965	-6.77992	6.07287	-4.93314	7.31707	-2.41697	4.02299
hsa05162	Human Diseases	Infectious diseases: Viral	Measles	-13.9831	4.79167	-1.64895	2.9703	-3.783	4.41176	-1.03195	2.32558	-12.7826	5.60472	-6.56023	4.45344	-5.04664	5.69106	-2.41113	2.87356
hsa05164	Human Diseases	Infectious diseases: Viral	Influenza A	-16.2057	5.83333	-3.8859	5.94059	-3.18918	4.41176	-2.35989	4.65116	-15.7848	7.07965	-9.07285	6.07287	-3.42068	4.87805	-1.34309	2.29885
hsa05161	Human Diseases	Infectious diseases: Viral	Hepatitis B	-21.7216	6.45833	-6.55343	7.92079	-5.56879	5.88235	-3.6417	5.81395	-18.8477	7.37463	-8.15007	5.26316	-7.00946	7.31707	-5.73434	5.17241
hsa05160	Human Diseases	Infectious diseases: Viral	Hepatitis C	-18.4601	5.625	-2.54054	3.9604	-4.82557	5.14706	-1.85914	3.48837	-15.1781	6.19469	-9.70864	5.66802	-7.36478	7.31707	-5.08144	4.5977
hsa05168	Human Diseases	Infectious diseases: Viral	Herpes simplex infection	-7.75424	3.95833	-2.01448	3.9604	-1.58594	2.94118	-0.293771	1.16279	-6.83856	4.42478	-3.67245	3.64372	-3.26643	4.87805	-0.763908	1.72414
hsa05169	Human Diseases	Infectious diseases: Viral	Epstein-Barr virus infection	-22.0974	7.5	-4.43819	6.93069	-2.10531	3.67647	-0.26649	1.16279	-18.2723	8.25959	-10.9442	7.28745	-2.28645	4.06504	-4.52799	5.17241
hsa05146	Human Diseases	Infectious diseases: Parasitic	Amoebiasis	-4.41577	2.08333	-2.03461	2.9703	-1.68973	2.20588	-1.28319	2.32558	-4.83679	2.65487	-2.38397	2.02429	-2.72002	3.25203	-2.18246	2.29885
hsa05144	Human Diseases	Infectious diseases: Parasitic	Malaria	-3.23504	1.25	-0.703939	0.990099	0	0	-0.76703	1.16279	-3.08181	1.47493	-0.379285	0.404858	-0.628166	0.813008	-0.49998	0.574713
hsa05145	Human Diseases	Infectious diseases: Parasitic	Toxoplasmosis	-16.7903	5	-3.80548	4.9505	-2.30832	2.94118	-2.03211	3.48837	-11.9266	5.01475	-9.45758	5.26316	-4.43577	4.87805	-2.73133	2.87356
hsa05140	Human Diseases	Infectious diseases: Parasitic	Leishmaniasis	-9.41605	2.91667	-6.03127	5.94059	-2.99996	2.94118	-2.56043	3.48837	-10.2116	3.83481	-6.98336	3.64372	-5.53017	4.87805	-1.72221	1.72414
hsa05142	Human Diseases	Infectious diseases: Parasitic	Chagas disease (American trypanosomiasis)	-15.5903	4.58333	-5.17853	5.94059	-4.44143	4.41176	-3.19955	4.65116	-15.0402	5.60472	-8.8867	4.8583	-7.04908	6.50407	-4.84055	4.02299
hsa05143	Human Diseases	Infectious diseases: Parasitic	African trypanosomiasis	-3.0852	1.04167	0	0	-0.718905	0.735294	0	0	-3.77611	1.47493	-0.494569	0.404858	-0.758401	0.813008	0	0
hsa01521	Human Diseases	Drug resistance: Antineoplastic	EGFR tyrosine kinase inhibitor resistance	-18.1783	4.58333	-4.54764	4.9505	-1.91464	2.20588	-0.583265	1.16279	-13.3555	4.71976	-7.81064	4.04858	-2.03253	2.43902	-10.6158	6.32184
hsa01524	Human Diseases	Drug resistance: Antineoplastic	Platinum drug resistance	-9.41605	2.91667	-2.3637	2.9703	-6.53526	5.14706	-2.56043	3.48837	-9.04951	3.53982	-8.15092	4.04858	-5.53017	4.87805	-3.59446	2.87356
hsa01523	Human Diseases	Drug resistance: Antineoplastic	Antifolate resistance	-10.6772	2.29167	-3.44569	2.9703	-5.95362	3.67647	-3.65139	3.48837	-9.2726	2.65487	-6.02047	2.42915	-9.54345	5.69106	-1.62349	1.14943
hsa01522	Human Diseases	Drug resistance: Antineoplastic	Endocrine resistance	-26.2679	6.25	-7.92975	7.92079	-5.72102	5.14706	-2.22651	3.48837	-22.1088	7.07965	-16.749	7.28745	-7.25573	6.50407	-15.0705	8.62069
